# Supplementary material for: Sequential combination of Michael and acetalization reactions: direct catalytic asymmetric synthesis of functionalized 4-nitromethyl-chromans as drug intermediates
Source: Royal Society of Chemistry journal article supplement (doi:10.1039/c0ob00189a), 2010-01-01

# Supporting Information-I

## Sequential Combination of Michael and Acetalization Reactions: Direct Catalytic Asymmetric Synthesis of Functionalized 4-Nitromethyl-chromans as Drug Intermediates

**Dhevalapally B. Ramachary\* and Rajasekar Sakthidevi**

*School of Chemistry, University of Hyderabad, Central University (P.O.),*

*Hyderabad 500 046, India*

[ramsc@uohyd.ernet.in](mailto:ramsc@uohyd.ernet.in)

**General Methods:** The  $^1\text{H}$  NMR and  $^{13}\text{C}$  NMR spectra were recorded at 400 MHz and 100 MHz, respectively. The chemical shifts are reported in ppm downfield to TMS ( $\delta = 0$ ) for  $^1\text{H}$  NMR and relative to the central  $\text{CDCl}_3$  resonance ( $\delta = 77.0$ ) for  $^{13}\text{C}$  NMR. *In the  $^{13}\text{C}$  NMR spectra, the nature of the carbons (C, CH,  $\text{CH}_2$  or  $\text{CH}_3$ ) was determined by recording the DEPT-135 experiment, and is given in parentheses.* The coupling constants  $J$  are given in Hz. Column chromatography was performed using Acme's silica gel (particle size 0.063-0.200 mm). High-resolution mass spectra were recorded on micromass ESI-TOF MS. GCMS mass spectrometry was performed on Shimadzu GCMS-QP2010 mass spectrometer. IR spectra were recorded on JASCO FT/IR-5300. Elemental analyses were recorded on a Thermo Finnigan Flash EA 1112 analyzer. Mass spectra were recorded on either VG7070H mass spectrometer using EI technique or Shimadzu-LCMS-2010 A mass spectrometer. The X-ray diffraction measurements were carried out at 298 K on an automated Enraf-Nonious MACH 3 diffractometer using graphite monochromated, Mo-K $\alpha$  ( $\lambda = 0.71073 \text{ \AA}$ ) radiation with CAD4 software or the X-ray intensity data were measured at 298 K on a Bruker SMART APEX CCD area detector system equipped with a

graphite monochromator and a Mo-K $\alpha$  fine-focus sealed tube ( $\lambda = 0.71073 \text{ \AA}$ ). For thin-layer chromatography (TLC), silica gel plates Merck 60 F254 were used and compounds were visualized by irradiation with UV light and/or by treatment with a solution of *p*-anisaldehyde (23 mL), conc. H<sub>2</sub>SO<sub>4</sub> (35 mL), acetic acid (10 mL), and ethanol (900 mL) followed by heating.

The enantiomeric excess (ee) of the *SMA* products was determined by chiral stationary phase HPLC using a Daicel Chiralcel OD-H column and hexane/2-propanol as the eluent or using a Daicel Chiralpak AD-H column and hexane/2-propanol as the eluent. Retention times and solvent ratios are indicated in the respective entries.

**Materials:** All solvents and commercially available chemicals were used as received.

### General Experimental Procedures for the *SMA* Reactions:

**Procedure A: General procedure for amine-catalyzed asymmetric *SMA* reaction of acetone **1** with 2-(2-nitro-vinyl)-phenols **2**:** In an ordinary glass vial equipped with a magnetic stirring bar, to a mixture of 9-amino-9-deoxyepiquinine **3h** (16 mg, 0.05 mmol) and diphenylacetic acid (11 mg, 0.05 mmol) in DCM (2.0 mL), was added acetone **1** (1.0 mL, 7.0 mmol) and of 2-hydroxy-nitro styrene **2** (83 mg, 0.5 mmol). After stirring the reaction mixture at 25 °C for 3 days, the crude reaction mixture was worked up with aqueous NH<sub>4</sub>Cl solution and the aqueous layer was extracted with ethyl acetate (3 x 10 mL). The combined organic layers were dried (Na<sub>2</sub>SO<sub>4</sub>), filtered and concentrated. Pure chiral products **4**↔**5**↔**6** were obtained by column chromatography (silica gel, mixture of hexane/ethyl acetate).

**Procedure B: General procedure for amino acid-catalyzed *SMA* reaction of acetone **1** with 2-(2-nitro-vinyl)-phenols **2**:** In an ordinary glass vial equipped with a magnetic stirring bar, to *S*-proline **3a** (6 mg, 0.05 mmol) in DMSO (2.0 mL), was added acetone **1** (1.0 mL, 7.0 mmol) and of 2-(2-nitro-vinyl)-phenols **2** (83 mg, 0.5 mmol). After stirring the reaction mixture at 25 °C for 2h, the crude reaction mixture was worked up with aqueous NH<sub>4</sub>Cl solution and the aqueous layer was extracted with ethyl acetate (3 x 10 mL). The combined organic layers were dried (Na<sub>2</sub>SO<sub>4</sub>), filtered and concentrated. The crude mixture was dissolved in of alcohol **7** (2.5 mL) and cooled to 0 °C, and added *p*-TSA (19 mg, 20 mol %). The mixture was stirred at the same temperature for 30 min and then brought to room temperature and stirred for another 90 min. The crude reaction mixture was worked up with aqueous NaHCO<sub>3</sub> solution and the aqueous layer was extracted with dichloromethane (3 x 10 mL). The combined

organic layers were dried ( $\text{Na}_2\text{SO}_4$ ), filtered and concentrated. Pure achiral products ( $\pm$ )-**8** and ( $\pm$ )-**9** were separated by column chromatography (silica gel, mixture of hexane/ethyl acetate).

**Procedure C: General procedure for amine-catalyzed asymmetric SMA reaction of acetone **1** with 2-(2-nitro-vinyl)-phenols **2**:** In an ordinary glass vial equipped with a magnetic stirring bar, to a mixture of 9-amino-9-deoxyepiquinine **3h** (16 mg, 0.05 mmol) and diphenylacetic acid (11 mg, 0.05 mmol) in DCM (2.0 mL), was added acetone **1** (1.0 mL, 7.0 mmol) and of 2-(2-nitro-vinyl)-phenols **2** (83 mg, 0.5 mmol). After stirring the reaction mixture at 25 °C for 3 days, the crude reaction mixture was worked up with aqueous  $\text{NH}_4\text{Cl}$  solution and the aqueous layer was extracted with ethyl acetate (3 x 10 mL). The combined organic layers were dried ( $\text{Na}_2\text{SO}_4$ ), filtered and concentrated. The crude mixture was dissolved in alcohol **7** (2.5 mL) and cooled to 0 °C, and added *p*-TSA (19 mg, 20 mol %). The mixture was stirred at the same temperature for 30 min and then brought to room temperature and stirred for another 90 min. The crude reaction mixture was worked up with aqueous  $\text{NaHCO}_3$  solution and the aqueous layer was extracted with dichloromethane (3 x 10 mL). The combined organic layers were dried ( $\text{Na}_2\text{SO}_4$ ), filtered and concentrated. Pure chiral products **8** and **9** were separated by column chromatography (silica gel, mixture of hexane/ethyl acetate).

**Procedure D: Bronsted acid-catalyzed hydrolysis of SMA products:** In an oven dried round bottom flask, to the Michael adduct **4a** $\leftrightarrow$ **5a** $\leftrightarrow$ **6a** (46 mg, 0.2 mmol), added toluene (2 mL), and *p*-TSA.H<sub>2</sub>O (7 mg, 20 mol%). After heating reaction mixture to 110 °C for 50 min, it was brought to 25 °C and the crude reaction mixture was worked up with aqueous  $\text{NaHCO}_3$  solution and the aqueous layer was extracted with dichloromethane (3 x 10 mL). The combined organic layers were dried ( $\text{Na}_2\text{SO}_4$ ), filtered and concentrated. Pure chiral product **10a** was obtained by column chromatography (silica gel, mixture of hexane/ethyl acetate).

**Procedure E: Base-catalyzed protection of SMA products:** To a solution of Michael adduct **4a** $\leftrightarrow$ **5a** $\leftrightarrow$ **6a** (44 mg, 0.2 mmol) in dry DCM (4 mL) were added successively *i*-Pr<sub>2</sub>NEt (0.13 mL, 0.8 mmol) and MOMCl (91  $\mu\text{L}$ , 1.2 mmol) at 0 °C. The resulting mixture was stirred at 25 °C for 4 h. The reaction mixture was worked up with aqueous  $\text{NH}_4\text{Cl}$  and the aqueous layer was extracted with ethyl acetate (3 x 10 mL). The combined organic layers were dried ( $\text{Na}_2\text{SO}_4$ ), filtered and concentrated. Pure product **11a** was obtained by column chromatography (silica gel, mixture of hexane/ethyl acetate).

**Procedure F: Methylenation of SMA products:** In an oven dried round bottom flask, to triphenyl(bromomethyl)phosphonium bromide (457 mg, 1.28 mmol), in dry benzene (1 mL), under nitrogen, was added potassium *tert*-butoxide (134 mg, 1.28 mmol). After the mixture becomes deep yellow in colour, added the Michael adduct **4a** $\leftrightarrow$ **5a** $\leftrightarrow$ **6a** (46 mg, 0.2 mmol) in benzene (1 mL). After

stirring the reaction mixture at 25 °C for 2h, the crude reaction mixture was worked up with aqueous NH<sub>4</sub>Cl solution and the aqueous layer was extracted with ethyl acetate (3 x 10 mL). The combined organic layers were dried (Na<sub>2</sub>SO<sub>4</sub>), filtered and concentrated. Pure product **12a** was obtained by column chromatography (silica gel, mixture of hexane/ethyl acetate).

**Procedure G: Iodine-catalyzed cyclization of olefin products:** In an oven dried round bottom flask, was taken 2-(3-methyl-1-nitromethyl-but-3-enyl)-phenol (44 mg, 0.2 mmol) **12a** in DCM and it was cooled to 0 °C. To that added iodine (61 mg, 0.24 mmol) and stirred at same temperature for 15 min. The reaction mixture was worked up with aqueous sodium thiosulphate and the aqueous layer was extracted with ethyl acetate (3 x 10 mL). The combined organic layers were dried (Na<sub>2</sub>SO<sub>4</sub>), filtered and concentrated. Pure product **13a** was obtained by column chromatography (silica gel, mixture of hexane/ethyl acetate).

**Procedure H: Hydrogenation followed by protection of nitro products:** In an oven dried round bottom flask, was taken activated (10%) Pd/C (7 mg, 10 mol-%), with compound **13a** or **9aa** dissolved in MeOH (4 mL) and stirred under H<sub>2</sub> atmosphere at 25 °C for 5 h. The reaction mixture was passed through a pad of celite and concentrated to dryness. The crude mixture was taken in a dry oven dried round bottom flask in dry DCM (2 mL) and added successively dry triethylamine (42 µL, 0.3 mmol) and di-*tert*-butyl carbonate (65 mg, 0.3 mmol) at 0 °C. The resulting mixture was stirred at 25 °C for 2 h and then worked up with aqueous NH<sub>4</sub>Cl and the aqueous layer was extracted with ethyl acetate (3 x 10 mL). The combined organic layers were dried (Na<sub>2</sub>SO<sub>4</sub>), filtered and concentrated. Pure product **14a** or **15aa** was obtained by column chromatography (silica gel, mixture of hexane/ethyl acetate).

**Procedure I: General procedure for diamine-catalyzed asymmetric SMA reaction of acetone 1 with 2-(2-nitro-vinyl)-phenols 2:** In an ordinary glass vial equipped with a magnetic stirring bar, to a mixture of (*S*)-(+)-1-(2-pyrrolidinylmethyl)-pyrrolidine **3d** (8 mg, 0.05 mmol) and diphenylacetic acid (11 mg, 0.05 mmol) in DCM (2.0 mL), was added acetone **1** (1 mL, 7.0 mmol) and of 2-(2-nitro-vinyl)-phenol **2a** (83 mg, 0.5 mmol). After stirring the reaction mixture at 25 °C for 3 days, the crude reaction mixture was worked up with aqueous NH<sub>4</sub>Cl solution and the aqueous layer was extracted with ethyl acetate (3 x 10 mL). The combined organic layers were dried (Na<sub>2</sub>SO<sub>4</sub>), filtered and concentrated. The crude mixture was dissolved in alcohol **7a** (2.5 mL) and cooled to 0 °C and added *p*-TSA (19 mg, 20 mol-%). The mixture was stirred at the same temperature for 30 min and then brought to room temperature and stirred for another 90 min. The crude reaction mixture was worked up with aqueous NaHCO<sub>3</sub> solution and the aqueous layer was extracted with dichloromethane (3 x 10 mL). The combined organic layers were dried (Na<sub>2</sub>SO<sub>4</sub>), filtered and concentrated. Pure products **8aa** and **9aa** were separated by column chromatography (silica gel, mixture of hexane/ethyl acetate).

**Procedure J: Base-catalyzed protection of SMA products:** To a solution of Michael adduct **4a** ↔ **5a** ↔ **6a** (44 mg, 0.2 mmol) in dry THF (2 mL) were added successively NaH (6 mg, 0.24 mmol) and MeI (74  $\mu$ L, 1.2 mmol) at 0 °C. The resulting mixture was stirred at same temperature for 30 min and then brought to 25 °C and stirred for 4.5 h. The reaction mixture was worked up with aqueous NH<sub>4</sub>Cl and the aqueous layer was extracted with ethyl acetate (3 x 10 mL). The combined organic layers were dried (Na<sub>2</sub>SO<sub>4</sub>), filtered and concentrated. Pure product (+)-**11ab** was obtained by column chromatography (silica gel, mixture of hexane/ethyl acetate).

**Procedure K: Hydrogenation of nitro products:** In an oven dried round bottom flask, was taken pre-activated 10% Pd/C (3 mg, 5 mol-%), with compound (+)-**11ab** (24 mg, 0.1 mmol) dissolved in dry ethyl acetate (1.0 mL) and stirred under H<sub>2</sub> atmosphere at 25 °C for 5 h. The reaction mixture was passed through a pad of celite and the pure product (+)-**16ab** was obtained by column chromatography (silica gel, mixture of hexane/ethyl acetate).

**Procedure L: Protection of hydrogenated products:** In an oven dried round bottom flask, were taken (+)-**16ab** (30 mg, 0.16 mmol) in chloroform (0.2 mL) and triethylamine (45  $\mu$ L, 0.32 mmol). To that reaction mixture, *p*-toluenesulphonyl chloride (33 mg, 0.176 mmol) was added drop wise in 0.3 mL chloroform under N<sub>2</sub> atmosphere at 0 °C. After 30 min, it was brought to 25 °C and stirred for overnight. The reaction mixture was then worked up with aqueous NH<sub>4</sub>Cl and the aqueous layer was extracted with ethyl acetate (3 x 10 mL). The combined organic layers were dried (Na<sub>2</sub>SO<sub>4</sub>), filtered and concentrated. Pure product (+)-**17ab** was obtained by column chromatography (silica gel, mixture of hexane/ethyl acetate).

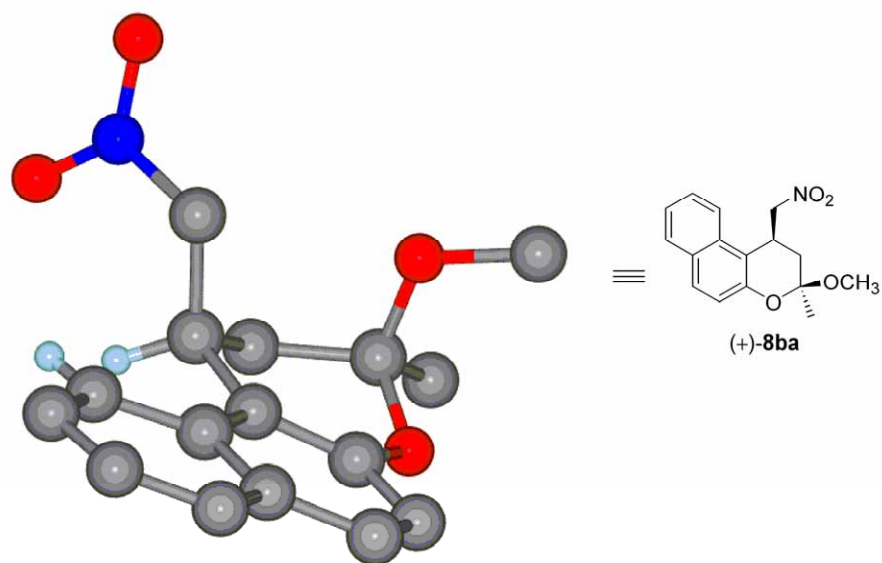

**Figure S1.** X-Ray crystal structure of chiral 3-methoxy-3-methyl-1-nitromethyl-2,3-dihydro-1*H*-benzo[*f*]chromene (**8ba**).

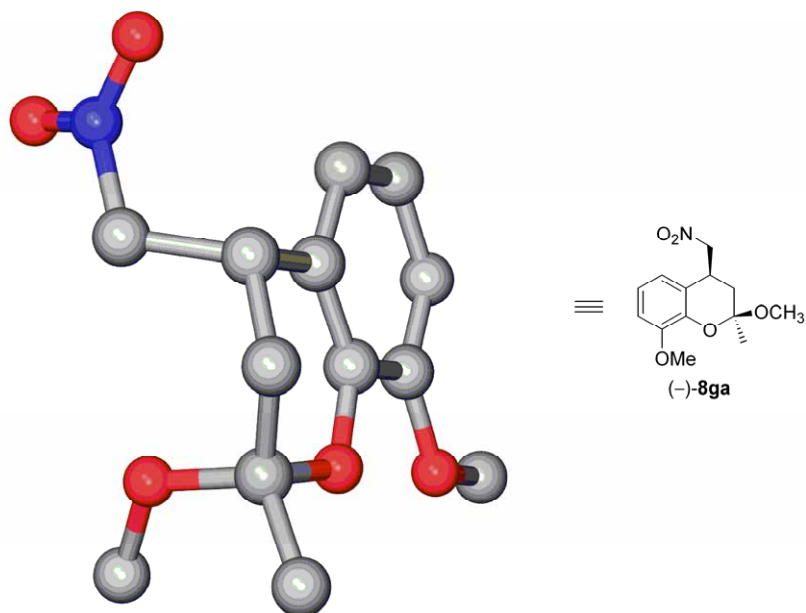

**Figure S2.** X-Ray crystal structure of chiral 2,8-dimethoxy-2-methyl-4-nitromethyl-chroman (**8ga**).

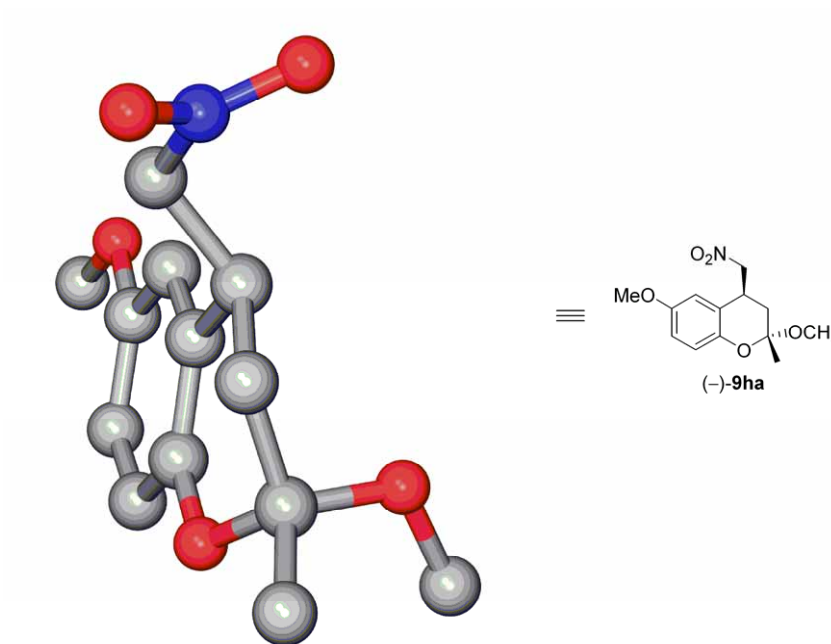

**Figure S3.** X-Ray crystal structure of chiral 2,6-dimethoxy-2-methyl-4-nitromethyl-chroman (**9ha**).

**Table S1:** Optimization for the SMA reaction of **1a**, **2a** and **7a**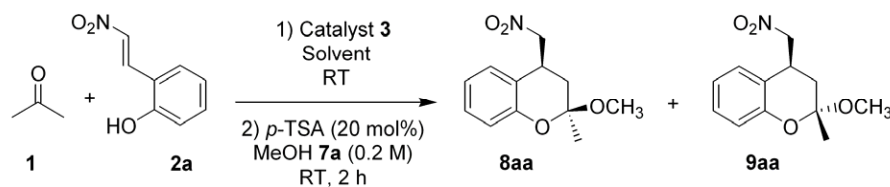

| Entry                    | Catalyst <b>3</b><br>[20 mol%]                             | Solvent<br>[0.25 M]                           | Time<br>[h] | Products yield [%] <sup>[a]</sup> |            | ee [%] <sup>[b]</sup> |            |
|--------------------------|------------------------------------------------------------|-----------------------------------------------|-------------|-----------------------------------|------------|-----------------------|------------|
|                          |                                                            |                                               |             | <b>8aa</b>                        | <b>9aa</b> | <b>8aa</b>            | <b>9aa</b> |
| 1                        | <b>3h</b> /PhCO <sub>2</sub> H                             | C <sub>6</sub> H <sub>5</sub> CH <sub>3</sub> | 24          | 42                                | 43         | 60                    | 58         |
| 2                        | <b>3h</b> /PhCO <sub>2</sub> H                             | Hexane                                        | 48          | 44                                | 46         | 49                    | 52         |
| 3                        | <b>3h</b> /PhCO <sub>2</sub> H                             | DCM                                           | 48          | 47                                | 42         | 64                    | 64         |
| 4                        | <b>3h</b> /PhCO <sub>2</sub> H                             | DCE                                           | 48          | 19                                | 11         | 64                    | 64         |
| 5                        | <b>3h</b> /PhCO <sub>2</sub> H                             | Neat                                          | 48          | 49                                | 42         | 39                    | 38         |
| 6                        | <b>3h</b> /CH <sub>3</sub> CO <sub>2</sub> H               | DCM                                           | 72          | 47                                | 36         | 75                    | 72         |
| 7                        | <b>3h</b> /CCl <sub>3</sub> CO <sub>2</sub> H              | DCM                                           | 96          | –                                 | –          | –                     | –          |
| 8                        | <b>3h</b> /C <sub>2</sub> H <sub>5</sub> CO <sub>2</sub> H | DCM                                           | 72          | 32                                | 25         | 70                    | 76         |
| 9                        | <b>3h</b> /PhCH <sub>2</sub> CO <sub>2</sub> H             | DCM                                           | 72          | 38                                | 33         | 82                    | 80         |
| <b>10</b>                | <b>3h</b> /Ph <sub>2</sub> CHCO <sub>2</sub> H             | <b>DCM</b>                                    | <b>72</b>   | <b>47</b>                         | <b>42</b>  | <b>84</b>             | <b>82</b>  |
| 11                       | <b>3h</b> /Ph <sub>3</sub> CCO <sub>2</sub> H              | DCM                                           | 96          | 44                                | 42         | 76                    | 76         |
| <b>12</b> <sup>[c]</sup> | <b>3h</b> /Ph <sub>2</sub> CHCO <sub>2</sub> H             | <b>DCM</b>                                    | <b>72</b>   | <b>40</b>                         | <b>42</b>  | <b>82</b>             | <b>82</b>  |
| <b>13</b> <sup>[c]</sup> | <b>3h</b> /Naphthalen-1-yl-acetic acid                     | <b>DCM</b>                                    | <b>72</b>   | <b>39</b>                         | <b>45</b>  | <b>82</b>             | <b>82</b>  |
| 14 <sup>[c]</sup>        | <b>3i</b> /PhCO <sub>2</sub> H                             | C <sub>6</sub> H <sub>5</sub> CH <sub>3</sub> | 48          | 19                                | 21         | 45                    | 54         |
| 15 <sup>[c]</sup>        | <b>3j</b> /PhCO <sub>2</sub> H                             | DCM                                           | 48          | 35                                | 35         | –60                   | –57        |
| 16 <sup>[c]</sup>        | <b>3j</b> /Naphthalen-1-yl-acetic acid                     | DCM                                           | 72          | 26                                | 30         | –73                   | –70        |
| 17 <sup>[c]</sup>        | <b>3k</b> /Naphthalen-1-yl-acetic acid                     | DCM                                           | 72          | 30                                | 38         | 79                    | 80         |
| 18 <sup>[c]</sup>        | <b>3l</b> /Naphthalen-1-yl-acetic acid                     | DCM                                           | 72          | 27                                | 27         | –76                   | –76        |

<sup>[a]</sup> Yield refers to the column purified product. <sup>[b]</sup> Ee determined by HPLC analysis. <sup>[c]</sup> Reactions were carried out with 10 mol% of catalyst **3** and 10 mol% of co-catalyst.

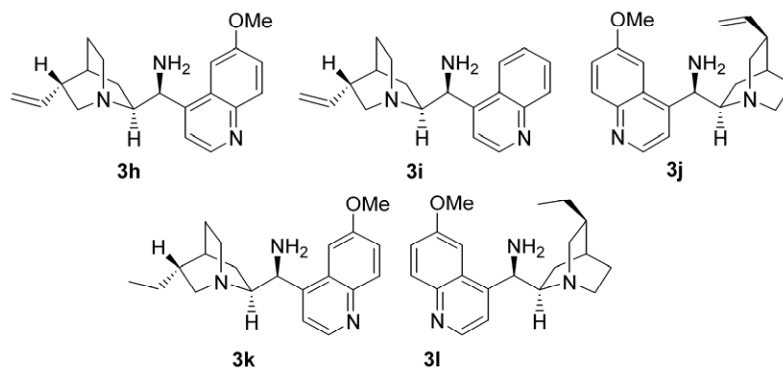



**Table S2:** Synthesis of 2-(2-nitro-vinyl)-phenols **2**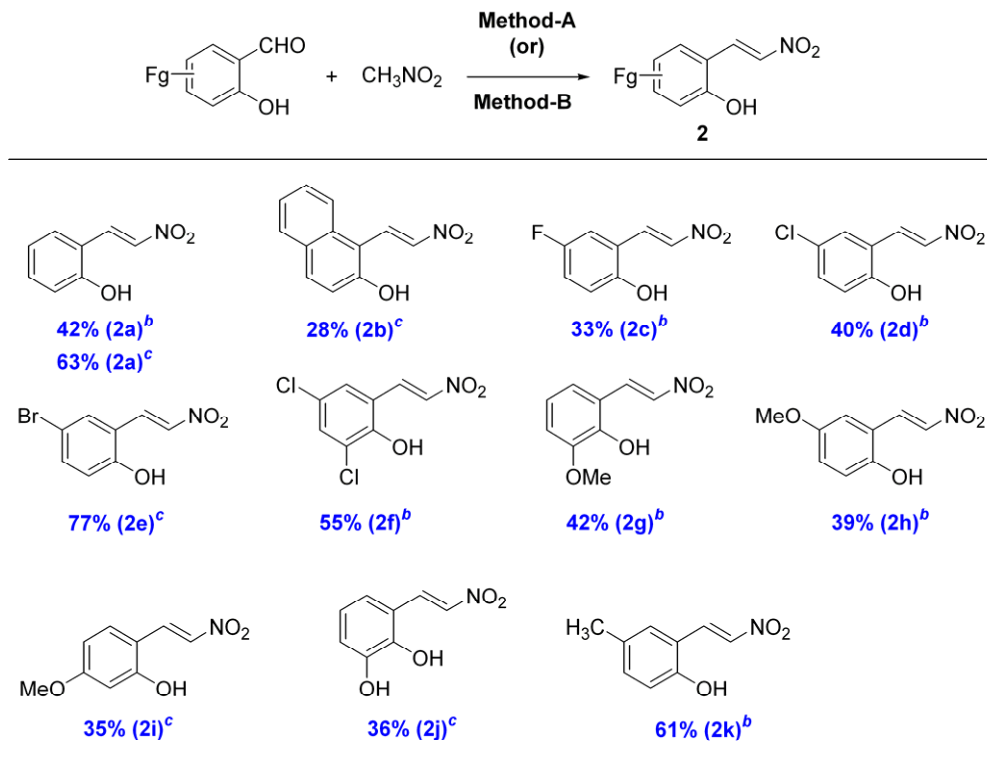

[a] Yield refers to column purified products. [b] Reagents and conditions for **Method-A**: To a mixture of 2-hydroxy-benzaldehydes (3 mmol) and nitromethane (15 mmol) in dry DCM (20 mL), added activated 4Å Molecular sieves (2g) followed by piperidine (20 mol%) and stirred at RT for overnight. [c] Reagents and conditions for **Method-B**: To a mixture of 2-hydroxy-benzaldehydes (3 mmol) and nitromethane (15 mmol) in AcOH (2.4 mL), added ammonium acetate and refluxed for 45 min.

**Table S3:** Synthesis of achiral SMA products **8** and **9**<sup>[a]</sup>

| Entry | 2-(2-Nitro-vinyl)-phenols <b>2</b> | ROH <b>7a/7b</b> | Products <b>8/9</b> | Ratio <sup>[b]</sup> [ <b>8/9</b> ] | Products yield [%] <sup>[c]</sup><br><b>8</b> <b>9</b> |
|-------|------------------------------------|------------------|---------------------|-------------------------------------|--------------------------------------------------------|
| 1     |                                    | <b>7a</b>        | <b>8aa/9aa</b>      | 1:1                                 | 46      46                                             |
| 2     |                                    | <b>7a</b>        | <b>8ba/9ba</b>      | 99:1                                | 82      <1                                             |
| 3     |                                    | <b>7a</b>        | <b>8ca/9ca</b>      | 1:1                                 | 44      44                                             |
| 4     |                                    | <b>7a</b>        | <b>8da/9da</b>      | 1:1                                 | 44      44                                             |
| 5     |                                    | <b>7a</b>        | <b>8ea/9ea</b>      | 1:1                                 | 46      46                                             |
| 6     |                                    | <b>7a</b>        | <b>8fa/9fa</b>      | 1:1                                 | 40      40                                             |
| 7     |                                    | <b>7a</b>        | <b>8ga/9ga</b>      | 1:1                                 | 42      42                                             |
| 8     |                                    | <b>7a</b>        | <b>8ha/9ha</b>      | 1:1                                 | 45      45                                             |
| 9     |                                    | <b>7a</b>        | <b>8ia/9ia</b>      | 1:1                                 | 48      48                                             |
| 10    |                                    | <b>7a</b>        | <b>8ja/9ja</b>      | 1:1                                 | 42      42                                             |
| 11    |                                    | <b>7a</b>        | <b>8ka/9ka</b>      | 1:1                                 | 46      46                                             |
| 12    |                                    | <b>7b</b>        | <b>8ab/9ab</b>      | 1:1                                 | 49      49                                             |
| 13    |                                    | <b>7b</b>        | <b>8eb/9eb</b>      | 1:1                                 | 46      46                                             |

[a] Reactions were carried out in DMSO (0.25 M) with 14 equiv. of **1** relative to the **2a-k** (0.5 mmol) in the presence of 10-mol% of catalyst **3a**. [b] Ratio is based on NMR analysis. [c] Yield refers to the column purified product.

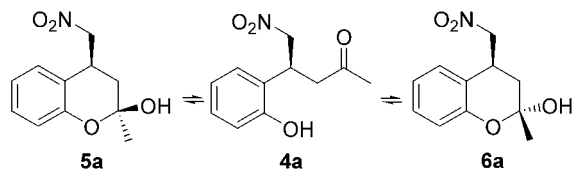

**(2*S*, 4*S*)-2-Methyl-4-nitromethyl-chroman-2-ol (5a),  
 (2*S*)-4-(2-Hydroxy-phenyl)-5-nitro-pentan-2-one  
 (4a), and (2*S*, 4*R*)-2-Methyl-4-nitromethyl-  
 chroman-2-ol (6a):** Prepared following the procedure

**A** and purified by column chromatography using EtOAc/hexane and isolated as liquid. The product **4a/5a/6a** was found to exist in rapid equilibrium with 1:1:1 ratio in solution. The enantiomeric excess (ee) was determined by chiral stationary phase HPLC using a Daicel Chiralpak AD-H column (hexane/2-propanol = 95:5, flow rate 0.5 mL/min,  $\lambda = 254$  nm),  $t_R = 43.21$  min (major),  $t_R = 58.4$  min (minor).  $[\alpha]_D^{25} = +15.0^\circ$  ( $c = 0.3$  g/100 mL,  $\text{CHCl}_3$ , 84% ee); IR (Neat):  $\nu_{\text{max}}$  3350 (O-H), 1708 (C=O), 1547 ( $\text{NO}_2$ ), 1491, 1454, 1378, 1227, 1166, 1117, 891, 758 and 663  $\text{cm}^{-1}$ ;  $^1\text{H}$  NMR ( $\text{CDCl}_3$ , 1:1:1 mixture of  $\delta$ -hydroxy ketone **4a** and lactols **5a/6a**)  $\delta$  7.21-7.16 (2H, m), 7.13-7.09 (3H, m), 7.06 (1H, d,  $J = 7.6$  Hz), 6.96-6.92 (3H, m), 6.89-6.83 (2H, m), 6.78 (1H, d,  $J = 8.0$  Hz), 6.37 (1H, s, Ar-OH), 5.07 (2H, dd,  $J = 12.8, 9.2$  Hz), 4.95 (1H, dd,  $J = 12.2, 5.2$  Hz), 4.72-4.66 (3H, m), 4.49 (1H, dd,  $J = 12.4, 9.2$  Hz), 4.20 (1H, t,  $J = 6.8$  Hz), 3.98-3.90 (1H, m), 3.72 (1H, dd,  $J = 14.6, 6.4$  Hz), 3.01 (1H, d,  $J = 7.2$  Hz), 2.84-2.80 (2H, m), 2.25-2.18 (3H, m), 2.13 (3H, s,  $\text{CH}_3$ ), 2.08-2.02 (2H, m), 1.66 (3H, s,  $\text{CH}_3$ ), 1.64 (3H, s,  $\text{CH}_3$ );  $^{13}\text{C}$  NMR ( $\text{CDCl}_3$ , 1:1:1 mixture of  $\delta$ -hydroxy ketone **4a** and lactols **5a/6a**, DEPT-135)  $\delta$  207.6 (C, C=O), 153.5 (C), 152.1 (C), 152.0 (C), 128.94 (2 x CH), 128.91 (CH), 128.7 (CH), 128.6 (CH), 125.7 (CH), 125.1 (C), 121.4 (CH), 121.3 (CH), 119.9 (C), 119.4 (C), 117.9 (CH), 117.8 (2 x CH), 116.9 (CH), 96.4 (C), 95.8 (C), 80.2 ( $\text{CH}_2$ ), 79.0 ( $\text{CH}_2$ ), 77.8 ( $\text{CH}_2$ ), 45.5 ( $\text{CH}_2$ ), 35.6 ( $\text{CH}_2$ ), 34.1 (CH), 33.0 ( $\text{CH}_2$ ), 32.1 ( $\text{CH}_3$ ), 30.2 (CH), 30.0 (CH), 29.5 ( $\text{CH}_3$ ), 29.1 ( $\text{CH}_3$ ); LRMS  $m/z$  222.15 ( $\text{M} - \text{H}^+$ ), calcd for  $\text{C}_{11}\text{H}_{13}\text{NO}_4$  223.0845; HRMS  $m/z$  246.0740 ( $\text{M} + \text{Na}$ ), calcd for  $\text{C}_{11}\text{H}_{13}\text{NO}_4\text{Na}$  246.0742; Anal. calcd for  $\text{C}_{11}\text{H}_{13}\text{NO}_4$  (223.0845): C, 59.19; H, 5.87; N, 6.27. Found: C, 59.25; H, 5.91; N, 6.23%.

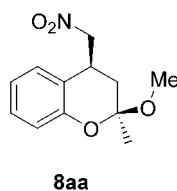

**(2*S*, 4*S*)-2-Methoxy-2-methyl-4-nitromethyl-chroman (8aa):** Prepared following the procedure **C** and purified by column chromatography using EtOAc/hexane and isolated as solid. The enantiomeric excess (ee) was determined by chiral stationary phase HPLC using a Daicel Chiralcel OD-H column (hexane/2-propanol = 99:1, flow rate 0.8 mL/min,  $\lambda = 254$  nm),  $t_R = 14.10$  min (major),  $t_R = 15.2$  min (minor). Mp 46  $^\circ\text{C}$ ;

$[\alpha]_D^{25} = +52.5^\circ$  ( $c = 0.25$  g/100 mL,  $\text{CHCl}_3$ , 84% ee); IR (Neat):  $\nu_{\text{max}}$  2924, 1581, 1550 ( $\text{NO}_2$ ), 1489, 1379, 1251, 1216, 1148, 1122, 1058, 877 and 757  $\text{cm}^{-1}$ ;  $^1\text{H}$  NMR ( $\text{CDCl}_3$ )  $\delta$  7.20 (1H, t,  $J = 7.6$  Hz), 7.12 (1H, d,  $J = 7.6$  Hz), 6.95 (1H, t,  $J = 7.6$  Hz), 6.89 (1H, d,  $J = 8.0$  Hz), 5.01 (1H, dd,  $J = 12.6, 8.8$  Hz), 4.63 (1H, dd,  $J = 12.8, 5.6$  Hz), 3.69 (1H, dd,  $J = 14.6, 6.8$  Hz), 3.24 (3H, s,  $\text{OCH}_3$ ), 2.20 (1H, d,  $J = 14.4$  Hz),

This journal is (c) The Royal Society of Chemistry 2010

2.07 (1H, dd,  $J = 14.4, 6.8$  Hz), 1.55 (3H, s,  $\text{CH}_3$ );  $^{13}\text{C}$  NMR ( $\text{CDCl}_3$ , DEPT-135)  $\delta$  151.8 (C), 128.9 (CH), 128.88 (CH), 121.5 (CH), 120.2 (C), 117.8 (CH), 98.5 (C), 80.7 ( $\text{CH}_2$ ), 48.8 ( $\text{CH}_3$ ,  $\text{OCH}_3$ ), 34.0 ( $\text{CH}_2$ ), 32.0 (CH), 23.0 ( $\text{CH}_3$ ); LRMS  $m/z$  236 ( $\text{M} - \text{H}^+$ ), calcd for  $\text{C}_{12}\text{H}_{15}\text{NO}_4$  237.1001; HRMS  $m/z$  260.0888 ( $\text{M} + \text{Na}$ ), calcd for  $\text{C}_{12}\text{H}_{15}\text{NO}_4\text{Na}$  260.0899; Anal. calcd for  $\text{C}_{12}\text{H}_{15}\text{NO}_4$  (237.1001): C, 60.75; H, 6.37; N, 5.90. Found: C, 60.85; H, 6.35; N, 5.85%.

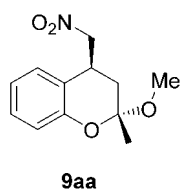

**(2S, 4R)-2-Methoxy-2-methyl-4-nitromethyl-chroman (9aa):** Prepared following the procedure C and purified by column chromatography using EtOAc/hexane and isolated as solid. The enantiomeric excess (ee) was determined by chiral stationary phase HPLC using a Daicel Chiralcel OD-H column (hexane/2-propanol = 99:1, flow rate 0.8 mL/min,  $\lambda = 254$  nm),  $t_{\text{R}} = 16.91$  min (major),  $t_{\text{R}} = 29.16$  min (minor). Mp 58 °C;  $[\alpha]_{\text{D}}^{25} = -22.6^\circ$  ( $c = 0.50$  g/100 mL,  $\text{CHCl}_3$ , 82% ee); IR (Neat):  $\nu_{\text{max}}$  2989, 1551 ( $\text{NO}_2$ ), 1490, 1452, 1379, 1257, 1223, 1188, 1067, 882, 756 and 646  $\text{cm}^{-1}$ ;  $^1\text{H}$  NMR ( $\text{CDCl}_3$ )  $\delta$  7.19 (1H, t,  $J = 7.6$  Hz), 7.10 (1H, d,  $J = 7.6$  Hz), 6.95 (1H, t,  $J = 7.2$  Hz), 6.89 (1H, d,  $J = 8.0$  Hz), 4.94 (1H, dd,  $J = 12.0, 4.8$  Hz), 4.46 (1H, dd,  $J = 12.4, 9.6$  Hz), 3.97-3.89 (1H, m), 3.23 (3H, s,  $\text{OCH}_3$ ), 2.22 (1H, dd,  $J = 13.2, 6.4$  Hz), 1.81 (1H, t,  $J = 12.8$  Hz), 1.57 (3H, s,  $\text{CH}_3$ );  $^{13}\text{C}$  NMR ( $\text{CDCl}_3$ , DEPT-135)  $\delta$  152.1 (C), 128.6 (CH), 125.8 (CH), 121.3 (CH), 120.6 (C), 117.9 (CH), 98.0 (C), 79.2 ( $\text{CH}_2$ ), 49.0 ( $\text{CH}_3$ ,  $\text{OCH}_3$ ), 36.6 ( $\text{CH}_2$ ), 30.2 (CH), 22.9 ( $\text{CH}_3$ ); LRMS  $m/z$  236 ( $\text{M} - \text{H}^+$ ), calcd for  $\text{C}_{12}\text{H}_{15}\text{NO}_4$  237.1001; HRMS  $m/z$  260.0891 ( $\text{M} + \text{Na}$ ), calcd for  $\text{C}_{12}\text{H}_{15}\text{NO}_4\text{Na}$  260.0899; Anal. calcd for  $\text{C}_{12}\text{H}_{15}\text{NO}_4$  (237.1001): C, 60.75; H, 6.37; N, 5.90. Found: C, 60.68; H, 6.32; N, 5.96%.

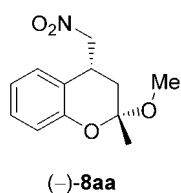

**(2R, 4R)-2-Methoxy-2-methyl-4-nitromethyl-chroman (8aa):** Prepared following the procedure I and purified by column chromatography using EtOAc/hexane and isolated as solid. The enantiomeric excess (ee) was determined by chiral stationary phase HPLC using a Daicel Chiralcel OD-H column (hexane/2-propanol = 99:1, flow rate 0.8 mL/min,  $\lambda = 254$  nm),  $t_{\text{R}} = 16.44$  min (minor),  $t_{\text{R}} = 18.99$  min (major). Mp 46 °C;  $[\alpha]_{\text{D}}^{25} = -17.4^\circ$  ( $c = 0.42$  g/100 mL,  $\text{CHCl}_3$ , 25% ee).

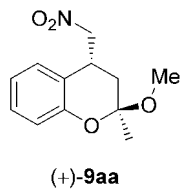

**(2R, 4S)-2-Methoxy-2-methyl-4-nitromethyl-chroman (9aa):** Prepared following the procedure I and purified by column chromatography using EtOAc/hexane and isolated as solid. The enantiomeric excess (ee) was determined by chiral stationary phase HPLC using a Daicel Chiralcel OD-H column (hexane/2-propanol = 99:1, flow rate 0.8 mL/min,  $\lambda = 254$  nm),  $t_{\text{R}} = 20.00$  min (minor),  $t_{\text{R}} = 39.24$  min (major). Mp 58 °C;  $[\alpha]_{\text{D}}^{25} = +10.8^\circ$  ( $c = 0.53$  g/100 mL,  $\text{CHCl}_3$ , 21% ee).

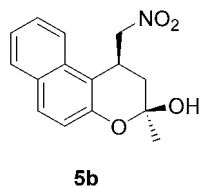

**(1S, 3S)-3-Methyl-1-nitromethyl-2,3-dihydro-1H-benzo[f]chromen-3-ol (5b):** Prepared following the procedure A and purified by column chromatography using EtOAc/hexane and isolated as solid. The enantiomeric excess (ee) was determined by chiral stationary phase HPLC using a Daicel Chiralcel OD-H column (hexane/2-propanol = 90:10, flow rate 1.0 mL/min,  $\lambda = 254$  nm),  $t_R = 13.69$  min (minor),  $t_R = 16.42$  min (major). Mp 116 °C;  $[\alpha]_D^{25} = +30.0^\circ$  ( $c = 0.38$  g/100 mL,  $\text{CHCl}_3$ , 98% ee); IR (Neat):  $\nu_{\text{max}}$  2796, 2758, 1621, 1544 ( $\text{NO}_2$ ), 1514, 1438, 1403, 1382, 1341, 1229, 1160, 1106, 1053, 1023, 975, 892, 819, 782, 682 and 640  $\text{cm}^{-1}$ ;  $^1\text{H}$  NMR ( $\text{CDCl}_3$ )  $\delta$  7.91 (1H, d,  $J = 8.0$  Hz), 7.81 (1H, d,  $J = 8.0$  Hz), 7.72 (1H, d,  $J = 8.0$  Hz), 7.58 (1H, t,  $J = 8.0$  Hz), 7.40 (1H, t,  $J = 8.0$  Hz), 7.04 (1H, d,  $J = 8.0$  Hz), 5.43 (1H, t,  $J = 12.0$  Hz), 4.75 (1H, dd,  $J = 12.0, 4.0$  Hz), 4.26 (1H, t,  $J = 4.0$  Hz), 2.75 (1H, s), 2.45 (1H, d,  $J = 16.0$  Hz), 2.08 (1H, dd,  $J = 14.0, 8.0$  Hz), 1.73 (3H, s,  $\text{CH}_3$ );  $^{13}\text{C}$  NMR ( $\text{CDCl}_3$ , DEPT-135)  $\delta$  150.3 (C), 131.4 (C), 129.9 (CH), 129.5 (C), 129.1 (CH), 127.5 (CH), 123.8 (CH), 121.0 (CH), 119.2 (CH), 110.0 (C), 96.6 (C), 76.9 ( $\text{CH}_2$ ), 31.8 ( $\text{CH}_2$ ), 30.2 (CH), 29.8 ( $\text{CH}_3$ ); LRMS  $m/z$  272.25 ( $\text{M} - \text{H}^+$ ), calcd for  $\text{C}_{15}\text{H}_{15}\text{NO}_4$  273.1001; HRMS  $m/z$  296.0898 ( $\text{M} + \text{Na}$ ), calcd for  $\text{C}_{15}\text{H}_{15}\text{NO}_4\text{Na}$  296.0899; Anal. calcd for  $\text{C}_{15}\text{H}_{15}\text{NO}_4$  (273.1001): C, 65.92; H, 5.53; N, 5.13. Found: C, 65.86; H, 5.49; N, 5.21%.

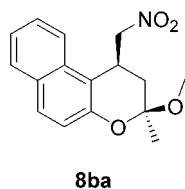

**(1S, 3S)-3-Methoxy-3-methyl-1-nitromethyl-2,3-dihydro-1H-benzo[f]chromene**

**(8ba):** Prepared following the procedure C and purified by column chromatography using EtOAc/hexane and isolated as solid. Mp 84 °C;  $[\alpha]_D^{25} = +71.5^\circ$  ( $c = 0.23$  g/100 mL,  $\text{CHCl}_3$ , 98% ee); IR (Neat):  $\nu_{\text{max}}$  3738, 1624, 1549 ( $\text{NO}_2$ ), 1378, 1176, 1115, 1052 and 817  $\text{cm}^{-1}$ ;  $^1\text{H}$  NMR ( $\text{CDCl}_3$ )  $\delta$  7.87 (1H, d,  $J = 8.4$  Hz), 7.78 (1H, d,  $J = 8.0$

Hz), 7.70 (1H, d,  $J = 8.8$  Hz), 7.55 (1H, t,  $J = 7.2$  Hz), 7.38 (1H, t,  $J = 7.2$  Hz), 7.08 (1H, d,  $J = 8.8$  Hz), 5.33 (1H, dd,  $J = 12.8, 11.2$  Hz), 4.71 (1H, dd,  $J = 13.2, 2.0$  Hz), 4.19-4.15 (1H, m), 3.30 (3H, s,  $\text{OCH}_3$ ), 2.41 (1H, d,  $J = 14.4$  Hz), 2.05 (1H, dd,  $J = 14.8, 6.4$  Hz), 1.60 (3H, s,  $\text{CH}_3$ );  $^{13}\text{C}$  NMR ( $\text{CDCl}_3$ , DEPT-135)  $\delta$  150.1 (C), 131.4 (C), 129.8 (CH), 129.5 (C), 129.0 (CH), 127.4 (CH), 123.7 (CH), 121.1 (CH), 119.1 (CH), 110.7 (C), 98.7 (C), 77.3 ( $\text{CH}_2$ ), 48.8 ( $\text{CH}_3, \text{OCH}_3$ ), 32.8 ( $\text{CH}_2$ ), 29.7 (CH), 23.2 ( $\text{CH}_3$ ); LRMS  $m/z$  286 ( $\text{M} - \text{H}^+$ ), calcd for  $\text{C}_{16}\text{H}_{17}\text{NO}_4$  287.1158; HRMS  $m/z$  310.0975 ( $\text{M} + \text{Na}$ ), calcd for  $\text{C}_{16}\text{H}_{17}\text{NO}_4\text{Na}$  310.1055; Anal. calcd for  $\text{C}_{16}\text{H}_{17}\text{NO}_4$  (287.1158): C, 66.89; H, 5.96; N, 4.88. Found: C, 66.83; H, 5.91; N, 4.92%.

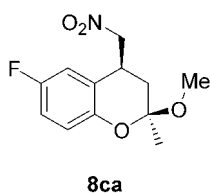

**(2S, 4S)-6-Fluoro-2-methoxy-2-methyl-4-nitromethyl-chroman (8ca):** Prepared

following the procedure C and purified by column chromatography using EtOAc/hexane and isolated as liquid. The enantiomeric excess (ee) was determined by chiral stationary phase HPLC using a Daicel Chiralpak AS-H column (hexane/2-propanol = 95:5, flow rate 1.0 mL/min,  $\lambda = 254$  nm),  $t_R = 6.00$  min (major),  $t_R = 6.73$  min (minor).  $[\alpha]_D^{25}$

= +11.5° (*c* = 0.26 g/100 mL, CHCl<sub>3</sub>, 82% *ee*); IR (Neat):  $\nu_{\max}$  1530 (NO<sub>2</sub>), 1492, 1427, 1379, 1248, 1195, 1145, 1120, 1056, 940, 877, 819 and 636 cm<sup>-1</sup>; <sup>1</sup>H NMR (CDCl<sub>3</sub>)  $\delta$  6.90 (1H, br dt, *J* = 9.0, 2.8 Hz), 6.86-6.82 (2H, m), 4.98 (1H, dd, *J* = 13.0, 8.8 Hz), 4.61 (1H, dd, *J* = 13.2, 5.6 Hz), 3.67 (1H, dd, *J* = 14.4, 6.8 Hz), 3.23 (3H, s, OCH<sub>3</sub>), 2.18 (1H, d, *J* = 14.4 Hz), 2.04 (1H, dd, *J* = 14.6, 6.8 Hz), 1.55 (3H, s, CH<sub>3</sub>); <sup>13</sup>C NMR (CDCl<sub>3</sub>, DEPT-135)  $\delta$  157.1 (C, d, *J* = 238.4 Hz), 147.8 (C), 121.3 (C, d, *J* = 6.8 Hz), 118.8 (CH, d, *J* = 7.9 Hz), 115.8 (CH, d, *J* = 22.9 Hz), 114.8 (CH, d, *J* = 23.0 Hz), 98.6 (C), 80.5 (CH<sub>2</sub>), 48.7 (CH<sub>3</sub>, OCH<sub>3</sub>), 33.8 (CH<sub>2</sub>), 32.0 (CH), 22.8 (CH<sub>3</sub>); LRMS *m/z* 254 (M - H<sup>+</sup>), calcd for C<sub>12</sub>H<sub>14</sub>FNO<sub>4</sub> 255.0907; HRMS *m/z* 301.1362 (M + 2Na), calcd for C<sub>12</sub>H<sub>14</sub>FNO<sub>4</sub>Na<sub>2</sub> 301.0703; Anal. calcd for C<sub>12</sub>H<sub>14</sub>FNO<sub>4</sub> (255.0907): C, 56.47; H, 5.53; N, 5.49. Found: C, 56.41; H, 5.54; N, 5.56%.

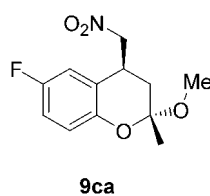

**(2S, 4R)-6-Fluoro-2-methoxy-2-methyl-4-nitromethyl-chroman (9ca):** Prepared following the procedure C and purified by column chromatography using EtOAc/hexane and isolated as liquid. The enantiomeric excess (*ee*) was determined by chiral stationary phase HPLC using a Daicel Chiralcel OD-H column (hexane/2-propanol = 97:3, flow rate 1.0 mL/min,  $\lambda$  = 254 nm), *t<sub>R</sub>* = 10.15 min (major), *t<sub>R</sub>* = 10.75 min (minor).  $[\alpha]_D^{25} = -36.2^\circ$  (*c* = 0.26 g/100 mL, CHCl<sub>3</sub>, 76% *ee*); IR (Neat):  $\nu_{\max}$  2997, 1622, 1535 (NO<sub>2</sub>), 1492, 1430, 1379, 1224, 1191, 1139, 1097, 1065, 883 and 802 cm<sup>-1</sup>; <sup>1</sup>H NMR (CDCl<sub>3</sub>)  $\delta$  6.89 (1H, br dt, *J* = 8.8, 2.8 Hz), 6.85-6.81 (2H, m), 4.85 (1H, dd, *J* = 12.4, 4.8 Hz), 4.47 (1H, dd, *J* = 12.4, 9.2 Hz), 3.93-3.85 (1H, m), 3.21 (3H, s, OCH<sub>3</sub>), 2.20 (1H, dd, *J* = 13.4, 6.0 Hz), 1.79 (1H, t, *J* = 12.8 Hz), 1.55 (3H, s, CH<sub>3</sub>); <sup>13</sup>C NMR (CDCl<sub>3</sub>, DEPT-135)  $\delta$  157.1 (C, d, *J* = 238.2 Hz), 148.1 (C), 121.7 (C, d, *J* = 6.8 Hz), 118.9 (CH, d, *J* = 8.0 Hz), 115.4 (CH, d, *J* = 22.8 Hz), 112.3 (CH, d, *J* = 23.7 Hz), 98.1 (C), 78.8 (CH<sub>2</sub>), 49.0 (CH<sub>3</sub>, OCH<sub>3</sub>), 36.2 (CH<sub>2</sub>), 30.4 (CH), 22.7 (CH<sub>3</sub>); LRMS *m/z* 254 (M - H<sup>+</sup>), calcd for C<sub>12</sub>H<sub>14</sub>FNO<sub>4</sub> 255.0907; HRMS *m/z* 278.0805 (M + Na), calcd for C<sub>12</sub>H<sub>14</sub>FNO<sub>4</sub>Na 278.0805; Anal. calcd for C<sub>12</sub>H<sub>14</sub>FNO<sub>4</sub> (255.0907): C, 56.47; H, 5.53; N, 5.49. Found: C, 56.44; H, 5.49; N, 5.56%.

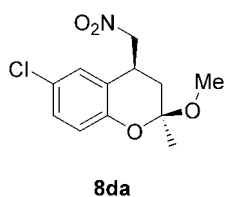

**(2S, 4S)-6-Chloro-2-methoxy-2-methyl-4-nitromethyl-chroman (8da):** Prepared following the procedure C and purified by column chromatography using EtOAc/hexane and isolated as liquid. The enantiomeric excess (*ee*) was determined by chiral stationary phase HPLC using a Daicel Chiralpak AS-H column (hexane/2-propanol = 95:5, flow rate 1.0 mL/min,  $\lambda$  = 254 nm), *t<sub>R</sub>* = 4.73 min (major), *t<sub>R</sub>* = 5.50 min (minor).  $[\alpha]_D^{25} = +13.0^\circ$  (*c* = 0.20 g/100 mL, CHCl<sub>3</sub>, 69% *ee*); IR (Neat):  $\nu_{\max}$  2993, 2941, 1549 (NO<sub>2</sub>), 1514, 1481, 1425, 1379, 1251, 1217, 1177, 1146, 1121, 1053, 877 and 821 cm<sup>-1</sup>; <sup>1</sup>H NMR (CDCl<sub>3</sub>)  $\delta$  7.15 (1H, dd, *J* = 8.8, 2.4 Hz), 7.12 (1H, d, *J* = 2.4 Hz), 6.83 (1H, d, *J* = 8.8 Hz), 5.00 (1H, dd, *J* = 13.0, 9.2 Hz), 4.60 (1H, dd, *J* = 13.0, 5.2 Hz), 3.66 (1H, dd, *J* = 15.2, 6.4 Hz), 3.23 (3H, s, OCH<sub>3</sub>), 2.19 (1H,

dd,  $J = 14.6, 0.8$  Hz), 2.04 (1H, dd,  $J = 14.8, 7.2$  Hz), 1.55 (3H, s,  $\text{CH}_3$ );  $^{13}\text{C}$  NMR ( $\text{CDCl}_3$ , DEPT-135)  $\delta$  150.5 (C), 128.9 (CH), 128.5 (CH), 126.1 (C), 121.8 (C), 119.2 (CH), 98.8 (C), 80.3 ( $\text{CH}_2$ ), 48.8 ( $\text{CH}_3$ ,  $\text{OCH}_3$ ), 33.7 ( $\text{CH}_2$ ), 31.8 (CH), 22.8 ( $\text{CH}_3$ ); LRMS  $m/z$  270 ( $\text{M} - \text{H}^+$ ), calcd for  $\text{C}_{12}\text{H}_{14}\text{ClNO}_4$  271.0611; HRMS  $m/z$  294.0511 ( $\text{M} + \text{Na}$ ), calcd for  $\text{C}_{12}\text{H}_{14}\text{ClNO}_4\text{Na}$  294.0509; Anal. calcd for  $\text{C}_{12}\text{H}_{14}\text{ClNO}_4$  (271.0611): C, 53.05; H, 5.19; N, 5.16. Found: C, 53.12; H, 5.15, N, 5.22%.

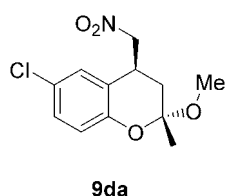

**(2R, 4S)-6-Chloro-2-methoxy-2-methyl-4-nitromethyl-chroman (9da):** Prepared following the procedure C and purified by column chromatography using EtOAc/hexane and isolated as liquid. The enantiomeric excess (ee) was determined by chiral stationary phase HPLC using a Daicel Chiralpak AS-H column (hexane/2-propanol = 95:5, flow rate 1.0 mL/min,  $\lambda = 254$  nm),  $t_R = 8.25$  min (major),  $t_R = 8.84$  min (minor).  $[\alpha]_D^{25} = -10.0^\circ$  ( $c = 0.18$  g/100 mL,  $\text{CHCl}_3$ , 70% ee); IR (Neat):  $\nu_{\text{max}}$  2939, 2299, 1551 ( $\text{NO}_2$ ), 1515, 1482, 1436, 1412, 1378, 1261, 1224, 1186, 1066, 881, 822, 680, 659 and 633  $\text{cm}^{-1}$ ;  $^1\text{H}$  NMR ( $\text{CDCl}_3$ )  $\delta$  7.15-7.13 (1H, m), 7.09-7.08 (1H, m), 6.83 (1H, d,  $J = 8.8$  Hz), 4.88 (1H, dd,  $J = 12.4, 4.8$  Hz), 4.47 (1H, dd,  $J = 12.4, 9.2$  Hz), 3.93-3.89 (1H, m), 3.22 (3H, s,  $\text{OCH}_3$ ), 2.20 (1H, dd,  $J = 11.2, 6.0$  Hz), 1.79 (1H, dd,  $J = 13.2, 12.4$  Hz), 1.56 (3H, s,  $\text{CH}_3$ );  $^{13}\text{C}$  NMR ( $\text{CDCl}_3$ , DEPT-135)  $\delta$  150.8 (C), 128.6 (CH), 126.1 (C), 125.8 (CH), 122.2 (C), 119.2 (CH), 98.3 (C), 78.7 ( $\text{CH}_2$ ), 49.1 ( $\text{CH}_3$ ,  $\text{OCH}_3$ ), 36.2 ( $\text{CH}_2$ ), 30.2 (CH), 22.6 ( $\text{CH}_3$ ); LRMS  $m/z$  270 ( $\text{M} - \text{H}^+$ ), calcd for  $\text{C}_{12}\text{H}_{14}\text{ClNO}_4$  271.0611; HRMS  $m/z$  294.0505 ( $\text{M} + \text{Na}$ ), calcd for  $\text{C}_{12}\text{H}_{14}\text{ClNO}_4\text{Na}$  294.0509; Anal. calcd for  $\text{C}_{12}\text{H}_{14}\text{ClNO}_4$  (271.0611): C, 53.05; H, 5.19; N, 5.16. Found: C, 53.10; H, 5.16; N, 5.23%.

**(2S, 4S)-6-Bromo-2-methoxy-2-methyl-4-nitromethyl-chroman (8ea):** Prepared following the procedure C and purified by column chromatography using EtOAc/hexane and isolated as liquid. The enantiomeric excess (ee) was determined by chiral stationary phase HPLC using a Daicel Chiralpak AS-H column (hexane/2-propanol = 91:9, flow rate 1.0 mL/min,  $\lambda = 254$  nm),  $t_R = 5.43$  min (minor),  $t_R = 5.96$  min (major).

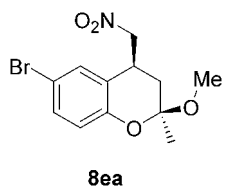

$[\alpha]_D^{25} = +63.2^\circ$  ( $c = 0.23$  g/100 mL,  $\text{CHCl}_3$ , 87% ee); IR (Neat):  $\nu_{\text{max}}$  1549 ( $\text{NO}_2$ ), 1479, 1427, 1379, 1251, 1215, 1174, 1148, 1124, 1055, 877 and 818  $\text{cm}^{-1}$ ;  $^1\text{H}$  NMR ( $\text{CDCl}_3$ )  $\delta$  7.30-7.26 (2H, m), 6.78 (1H, d,  $J = 8.4$  Hz), 5.00 (1H, dd,  $J = 13.2, 9.2$  Hz), 4.60 (1H, dd,  $J = 13.0, 5.2$  Hz), 3.69-3.64 (1H, m), 3.23 (3H, s,  $\text{OCH}_3$ ), 2.19 (1H, dd,  $J = 14.8, 1.2$  Hz), 2.03 (1H, dd,  $J = 14.6, 7.2$  Hz), 1.55 (3H, s,  $\text{CH}_3$ );  $^{13}\text{C}$  NMR ( $\text{CDCl}_3$ , DEPT-135)  $\delta$  151.1 (C), 131.8 (CH), 131.5 (CH), 122.4 (C), 119.6 (CH), 113.4 (C), 98.8 (C), 80.4 ( $\text{CH}_2$ ), 48.8 ( $\text{CH}_3$ ,  $\text{OCH}_3$ ), 33.8 ( $\text{CH}_2$ ), 31.7 (CH), 22.8 ( $\text{CH}_3$ ); LRMS  $m/z$  314 ( $\text{M} - \text{H}^+$ ), calcd for  $\text{C}_{12}\text{H}_{14}\text{BrNO}_4$  315.0106; HRMS  $m/z$  338.0012 ( $\text{M} + \text{Na}$ ), calcd for  $\text{C}_{12}\text{H}_{14}\text{BrNO}_4\text{Na}$  338.0004; Anal.

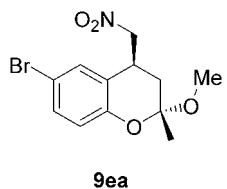

This journal is (c) The Royal Society of Chemistry 2010

calcd for  $C_{12}H_{14}BrNO_4$  (315.0106): C, 45.59; H, 4.46; N, 4.43. Found: C, 45.68; H, 4.39; N, 4.47%.

**(2S, 4R)-6-Bromo-2-methoxy-2-methyl-4-nitromethyl-chroman (9ea):** Prepared following the procedure C and purified by column chromatography using EtOAc/hexane and isolated as liquid. The enantiomeric excess (ee) was determined by chiral stationary phase HPLC using a Daicel Chiralcel OD-H column (hexane/2-propanol = 95:5, flow rate 0.8 mL/min,  $\lambda = 254$  nm),  $t_R = 11.10$  min (major),  $t_R = 14.47$  min (minor).  $[\alpha]_D^{25} = -15.6^\circ$  ( $c = 0.18$  g/100 mL,  $CHCl_3$ , 86% ee); IR (Neat):  $\nu_{max}$  1551 ( $NO_2$ ), 1514, 1481, 1379, 1255, 1224, 1186, 1066 and 881  $cm^{-1}$ ;  $^1H$  NMR ( $CDCl_3$ )  $\delta$  7.29-7.26 (1H, m), 7.23-7.22 (1H, m), 6.77 (1H, d,  $J = 8.8$  Hz), 4.89 (1H, dd,  $J = 12.4, 4.8$  Hz), 4.46 (1H, dd,  $J = 12.0, 9.2$  Hz), 3.94-3.86 (1H, m), 3.22 (3H, s,  $OCH_3$ ), 2.21 (1H, dd,  $J = 13.2, 6.4$  Hz), 1.78 (1H, dd,  $J = 13.0, 12.4$  Hz), 1.56 (3H, s,  $CH_3$ );  $^{13}C$  NMR ( $CDCl_3$ , DEPT-135)  $\delta$  151.3 (C), 131.6 (CH), 128.7 (CH), 122.8 (C), 119.7 (CH), 113.4 (C), 98.3 (C), 78.7 ( $CH_2$ ), 49.1 ( $CH_3, OCH_3$ ), 36.2 ( $CH_2$ ), 30.1 (CH), 22.7 ( $CH_3$ ); LRMS  $m/z$  314 ( $M - H^+$ ), calcd for  $C_{12}H_{14}BrNO_4$  315.0106; HRMS  $m/z$  338.0004 ( $M + Na$ ), calcd for  $C_{12}H_{14}BrNO_4Na$  338.0004; Anal. calcd for  $C_{12}H_{14}BrNO_4$  (315.0106): C, 45.59; H, 4.46; N, 4.43. Found: C, 45.65; H, 4.41; N, 4.51%.

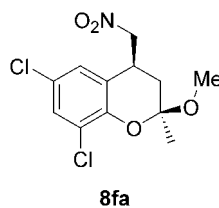

**(2S, 4S)-6,8-Dichloro-2-methoxy-2-methyl-4-nitromethyl-chroman (8fa):**

Prepared following the procedure C and purified by column chromatography using EtOAc/hexane and isolated as solid. The enantiomeric excess (ee) was determined by chiral stationary phase HPLC using a Daicel Chiralpak AS-H column (hexane/2-propanol = 97:3, flow rate 1.0 mL/min,  $\lambda = 254$  nm),  $t_R = 6.43$  min (minor),  $t_R = 7.20$  min (major). Mp 62  $^\circ C$ ;  $[\alpha]_D^{25} = -7.6^\circ$  ( $c = 0.30$  g/100 mL,  $CHCl_3$ , 88% ee); IR (Neat):  $\nu_{max}$  2962, 1548 ( $NO_2$ ), 1450, 1380, 1235, 1177, 1090, 1050, 1024, 937, 882, 823 and 633  $cm^{-1}$ ;  $^1H$  NMR ( $CDCl_3$ )  $\delta$  7.29 (1H, br d,  $J = 2.0$  Hz), 7.05-7.04 (1H, m), 4.98 (1H, dd,  $J = 13.4, 9.2$  Hz), 4.59 (1H, dd,  $J = 13.4, 5.2$  Hz), 3.70 (1H, dd,  $J = 14.2, 6.8$  Hz), 3.25 (3H, s,  $OCH_3$ ), 2.22 (1H, br d,  $J = 14.8$  Hz), 2.09 (1H, dd,  $J = 14.6, 7.2$  Hz), 1.62 (3H, s,  $CH_3$ );  $^{13}C$  NMR ( $CDCl_3$ , DEPT-135)  $\delta$  146.6 (C), 129.2 (CH), 127.0 (CH), 125.9 (C), 123.7 (C), 123.3 (C), 99.6 (C), 80.3 ( $CH_2$ ), 49.1 ( $CH_3, OCH_3$ ), 33.8 ( $CH_2$ ), 31.9 (CH), 22.7 ( $CH_3$ ); LRMS  $m/z$  304 ( $M - H^+$ ), calcd for  $C_{12}H_{13}Cl_2NO_4$  305.0222; HRMS  $m/z$  328.0110 ( $M + Na$ ), calcd for  $C_{12}H_{13}Cl_2NO_4Na$  328.0119.

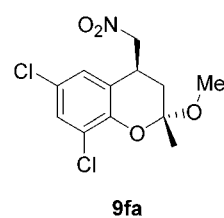

**(2R, 4S)-6,8-Dichloro-2-methoxy-2-methyl-4-nitromethyl-chroman (9fa):**

Prepared following the procedure C and purified by column chromatography using EtOAc/hexane and isolated as solid. The enantiomeric excess (ee) was determined by chiral stationary phase HPLC using a Daicel Chiralpak AS-H column (hexane/2-propanol = 97:3, flow rate 1.0 mL/min,  $\lambda = 254$  nm),  $t_R = 10.39$  min (major),  $t_R =$



This journal is (c) The Royal Society of Chemistry 2010

11.34 min (minor). Mp 94 °C;  $[\alpha]_{\text{D}}^{25} = -64.6^{\circ}$  ( $c = 0.22$  g/100 mL,  $\text{CHCl}_3$ , 91% ee); IR (Neat):  $\nu_{\text{max}}$  2963, 1557 ( $\text{NO}_2$ ), 1455, 1382, 1278, 1239, 1181, 1082, 1051, 1026, 882, 678 and 636  $\text{cm}^{-1}$ ;  $^1\text{H}$  NMR ( $\text{CDCl}_3$ )  $\delta$  7.29-7.28 (1H, m), 7.02-7.01 (1H, m), 4.85 (1H, dd,  $J = 12.6, 4.4$  Hz), 4.50 (1H, dd,  $J = 12.8, 8.8$  Hz), 3.94-3.86 (1H, m), 3.23 (3H, s,  $\text{OCH}_3$ ), 2.25 (1H, dd,  $J = 13.2, 6.4$  Hz), 1.86 (1H, t,  $J = 12.8$  Hz), 1.63 (3H, s,  $\text{CH}_3$ );  $^{13}\text{C}$  NMR ( $\text{CDCl}_3$ , DEPT-135)  $\delta$  146.9 (C), 128.9 (CH), 125.9 (C), 124.5 (CH), 123.8 (C), 123.7 (C), 99.2 (C), 78.5 ( $\text{CH}_2$ ), 49.3 ( $\text{CH}_3$ ,  $\text{OCH}_3$ ), 36.2 ( $\text{CH}_2$ ), 30.5 (CH), 22.5 ( $\text{CH}_3$ ); LRMS  $m/z$  306.30 ( $\text{M} + \text{H}^+$ ), calcd for  $\text{C}_{12}\text{H}_{13}\text{Cl}_2\text{NO}_4$  305.0222; HRMS  $m/z$  328.0110 ( $\text{M} + \text{Na}$ ), calcd for  $\text{C}_{12}\text{H}_{13}\text{Cl}_2\text{NO}_4\text{Na}$  328.0119; Anal. calcd for  $\text{C}_{12}\text{H}_{13}\text{Cl}_2\text{NO}_4$  (306.0222): C, 47.08; H, 4.28; N, 4.58. Found: C, 47.12; H, 4.23; N, 4.51%.

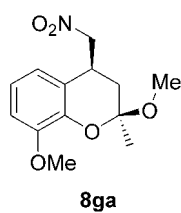

**(2S, 4S)-2,8-Dimethoxy-2-methyl-4-nitromethyl-chroman (8ga):** Prepared following the procedure C and purified by column chromatography using EtOAc/hexane and isolated as solid. The enantiomeric excess (ee) was determined by chiral stationary phase HPLC using a Daicel Chiralpak AS-H column (hexane/2-propanol = 95:5, flow rate 1.0 mL/min,  $\lambda = 254$  nm),  $t_{\text{R}} = 7.40$  min (major),  $t_{\text{R}} = 8.38$  min (minor). Mp 74 °C;  $[\alpha]_{\text{D}}^{25} = -43.1^{\circ}$  ( $c = 0.23$  g/100 mL,  $\text{CHCl}_3$ , 79% ee); IR (Neat):  $\nu_{\text{max}}$  3729, 1584, 1546 ( $\text{NO}_2$ ), 1479, 1378, 1262, 1212, 1086, 1053 and 661  $\text{cm}^{-1}$ ;  $^1\text{H}$  NMR ( $\text{CDCl}_3$ )  $\delta$  6.90 (1H, t,  $J = 8.0$  Hz), 6.81 (1H, dd,  $J = 8.2, 1.2$  Hz), 6.74-6.72 (1H, m), 5.00 (1H, dd,  $J = 12.8, 9.2$  Hz), 4.63 (1H, dd,  $J = 12.8, 5.2$  Hz), 3.86 (3H, s,  $\text{Ar-OCH}_3$ ), 3.72-3.66 (1H, m), 3.25 (3H, s,  $\text{OCH}_3$ ), 2.19 (1H, dd,  $J = 14.6, 1.6$  Hz), 2.08 (1H, dd,  $J = 14.8, 6.8$  Hz), 1.62 (3H, s,  $\text{CH}_3$ );  $^{13}\text{C}$  NMR ( $\text{CDCl}_3$ , DEPT-135)  $\delta$  149.0 (C), 141.3 (C), 121.0 (C), 120.9 (CH), 120.4 (CH), 110.6 (CH), 98.5 (C), 80.6 ( $\text{CH}_2$ ), 55.9 ( $\text{CH}_3$ ,  $\text{OCH}_3$ ), 48.8 ( $\text{CH}_3$ ,  $\text{OCH}_3$ ), 33.8 ( $\text{CH}_2$ ), 31.9 (CH), 23.0 ( $\text{CH}_3$ ); LRMS  $m/z$  268 ( $\text{M} + \text{H}^+$ ), calcd for  $\text{C}_{13}\text{H}_{17}\text{NO}_5$  267.1107; HRMS  $m/z$  290.1001 ( $\text{M} + \text{Na}$ ), calcd for  $\text{C}_{13}\text{H}_{17}\text{NO}_5\text{Na}$  290.1004; Anal. calcd for  $\text{C}_{13}\text{H}_{17}\text{NO}_5$  (267.1107): C, 58.42; H, 6.41; N, 5.24. Found: C, 58.36; H, 6.45; N, 5.28%.

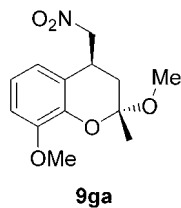

**(2R, 4S)-2,8-Dimethoxy-2-methyl-4-nitromethyl-chroman (9ga):** Prepared following the procedure C and purified by column chromatography using EtOAc/hexane and isolated as liquid. The enantiomeric excess (ee) was determined by chiral stationary phase HPLC using a Daicel Chiralpak AS-H column (hexane/2-propanol = 95:5, flow rate 1.0 mL/min,  $\lambda = 254$  nm),  $t_{\text{R}} = 10.49$  min (major),  $t_{\text{R}} = 12.27$  min (minor).  $[\alpha]_{\text{D}}^{25} = -62.3^{\circ}$  ( $c = 0.14$  g/100 mL,  $\text{CHCl}_3$ , 79% ee); IR (Neat):  $\nu_{\text{max}}$  2921, 2850, 1583, 1546 ( $\text{NO}_2$ ), 1470, 1379, 1261, 1223, 1183, 1082, 1055, 1032, 906, 686 and 632  $\text{cm}^{-1}$ ;  $^1\text{H}$  NMR ( $\text{CDCl}_3$ )  $\delta$  6.90 (1H, t,  $J = 8.0$  Hz), 6.81 (1H, d,  $J = 7.6$  Hz), 6.71 (1H, dt,  $J = 8.0, 1.2$  Hz), 4.91 (1H, dd,  $J = 12.4, 4.8$  Hz), 4.44 (1H, dd,  $J = 12.4, 9.6$  Hz), 3.96-3.88 (1H, m), 3.86 (3H, s,  $\text{Ar-OCH}_3$ ), 3.23 (3H, s,  $\text{OCH}_3$ ), 2.22 (1H, dd,  $J = 13.4, 6.0$

This journal is (c) The Royal Society of Chemistry 2010

Hz), 1.84 (1H, dd,  $J = 13.2, 12.0$  Hz), 1.63 (3H, s,  $CH_3$ );  $^{13}C$  NMR ( $CDCl_3$ , DEPT-135)  $\delta$  149.1 (C), 141.5 (C), 121.5 (C), 120.8 (CH), 117.5 (CH), 110.6 (CH), 98.1 (C), 79.3 ( $CH_2$ ), 56.0 ( $CH_3$ , OCH<sub>3</sub>), 49.1 ( $CH_3$ , OCH<sub>3</sub>), 36.5 ( $CH_2$ ), 30.4 (CH), 22.9 ( $CH_3$ ); LRMS  $m/z$  268 ( $M + H^+$ ), calcd for  $C_{13}H_{17}NO_5$  267.1107; HRMS  $m/z$  290.1000 ( $M + Na$ ), calcd for  $C_{13}H_{17}NO_5Na$  290.1004; Anal. calcd for  $C_{13}H_{17}NO_5$  (267.1107): C, 58.42; H, 6.41; N, 5.24. Found: C, 58.36; H, 6.44; N, 5.32%.

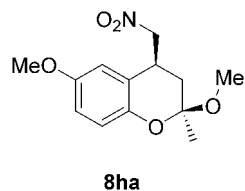

**(2S, 4S)-2,6-Dimethoxy-2-methyl-4-nitromethyl-chroman (8ha):** Prepared following the procedure C and purified by column chromatography using EtOAc/hexane and isolated as solid. The enantiomeric excess (ee) was determined by chiral stationary phase HPLC using a Daicel Chiralpak AS-H column (hexane/2-propanol = 95:5, flow rate 1.0 mL/min,  $\lambda = 254$  nm),  $t_R = 6.21$  min (minor),  $t_R =$

6.91 min (major). Mp 68 °C;  $[\alpha]_D^{25} = +20.7^\circ$  ( $c = 0.28$  g/100 mL,  $CHCl_3$ , 79% ee); IR (Neat):  $\nu_{max}$  2956, 1727, 1550 ( $NO_2$ ), 1495, 1426, 1380, 1251, 1207, 1147, 1107, 1049, 937, 874, 789, and 645  $cm^{-1}$ ;  $^1H$  NMR ( $CDCl_3$ )  $\delta$  6.83-6.76 (2H, m), 6.64 (1H, d,  $J = 2.0$  Hz), 5.00 (1H, dd,  $J = 12.8, 9.2$  Hz), 4.63 (1H, dd,  $J = 12.8, 5.6$  Hz), 3.75 (3H, s, Ar-OCH<sub>3</sub>), 3.65 (1H, dd,  $J = 14.2, 6.8$  Hz), 3.22 (3H, s, OCH<sub>3</sub>), 2.16 (1H, d,  $J = 14.8$  Hz), 2.04 (1H, dd,  $J = 14.4, 6.8$  Hz), 1.53 (3H, s,  $CH_3$ );  $^{13}C$  NMR ( $CDCl_3$ , DEPT-135)  $\delta$  154.0 (C), 145.6 (C), 120.7 (C), 118.4 (CH), 115.1 (CH), 113.1 (CH), 98.3 (C), 80.7 ( $CH_2$ ), 55.6 ( $CH_3$ , OCH<sub>3</sub>), 48.6 ( $CH_3$ , OCH<sub>3</sub>), 33.9 ( $CH_2$ ), 32.3 (CH), 22.9 ( $CH_3$ ); LRMS  $m/z$  266 ( $M - H^+$ ), calcd for  $C_{13}H_{17}NO_5$  267.1107; HRMS  $m/z$  290.0992 ( $M + Na$ ), calcd for  $C_{13}H_{17}NO_5Na$  290.1004; Anal. calcd for  $C_{13}H_{17}NO_5$  (267.1107): C, 58.42; H, 6.41; N, 5.24. Found: C, 58.45; H, 6.38; N, 5.28%.

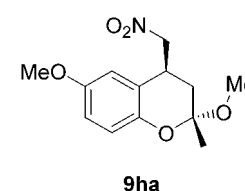

**(2R, 4S)-2,6-Dimethoxy-2-methyl-4-nitromethyl-chroman (9ha):** Prepared following the procedure C and purified by column chromatography using EtOAc/hexane and isolated as solid. The enantiomeric excess (ee) was determined by chiral stationary phase HPLC using a Daicel Chiralpak AS-H column

(hexane/2-propanol = 95:5, flow rate 1.0 mL/min,  $\lambda = 254$  nm),  $t_R = 9.65$  min (major),  $t_R = 11.11$  min (minor). Mp 110 °C;  $[\alpha]_D^{25} = -47.6^\circ$  ( $c = 0.28$  g/100 mL,  $CHCl_3$ , 79% ee); IR (Neat):  $\nu_{max}$  2940, 2340, 1546 ( $NO_2$ ), 1499, 1379, 1281, 1251, 1220, 1150, 1106, 1068, 1037, 887, 821, 665 and 637  $cm^{-1}$ ;  $^1H$  NMR ( $CDCl_3$ )  $\delta$  6.82 (1H, d,  $J = 8.8$  Hz), 6.76 (1H, dd,  $J = 8.8, 2.4$  Hz), 6.63 (1H, d,  $J = 2.0$  Hz), 4.89 (1H, dd,  $J = 12.4, 4.8$  Hz), 4.45 (1H, dd,  $J = 12.2, 9.2$  Hz), 3.93-3.85 (1H, m), 3.75 (3H, s, Ar-OCH<sub>3</sub>), 3.21 (3H, s, OCH<sub>3</sub>), 2.19 (1H, dd,  $J = 13.2, 6.0$  Hz), 1.79 (1H, t,  $J = 12.4$  Hz), 1.54 (3H, s,  $CH_3$ );  $^{13}C$  NMR ( $CDCl_3$ , DEPT-135)  $\delta$  153.9 (C), 145.9 (C), 121.2 (C), 118.4 (CH), 114.1 (CH), 111.2 (CH), 97.8 (C), 79.2 ( $CH_2$ ), 55.6 ( $CH_3$ , OCH<sub>3</sub>), 48.9 ( $CH_3$ , OCH<sub>3</sub>), 36.5 ( $CH_2$ ), 30.6 (CH), 22.8 ( $CH_3$ ); LRMS  $m/z$  266 ( $M - H^+$ ), calcd for  $C_{13}H_{17}NO_5$  267.1107; HRMS  $m/z$  290.0975 ( $M + Na$ ), calcd for  $C_{13}H_{17}NO_5Na$

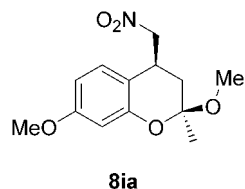

This journal is (c) The Royal Society of Chemistry 2010

290.1004; Anal. calcd for C<sub>13</sub>H<sub>17</sub>NO<sub>5</sub> (267.1107): C, 58.42; H, 6.41; N, 5.24. Found: C, 58.32; H, 6.44; N, 5.28%.

**(2S, 4S)-2,7-Dimethoxy-2-methyl-4-nitromethyl-chroman (8ia):** Prepared following the procedure C and purified by column chromatography using EtOAc/hexane and isolated as liquid. The enantiomeric excess (ee) was determined by chiral stationary phase HPLC using a Daicel Chiralpak AS-H column (hexane/2-propanol = 95:5, flow rate 1.0 mL/min,  $\lambda$  = 254 nm),  $t_R$  = 6.64 min (minor),  $t_R$  = 7.19 min (major).  $[\alpha]_D^{25} = -10.9^\circ$  ( $c = 0.18$  g/100 mL, CHCl<sub>3</sub>, 80% ee); IR (Neat):  $\nu_{\max}$  2960, 1620, 1548 (NO<sub>2</sub>), 1504, 1439, 1379, 1335, 1268, 1197, 1149, 1119, 1055, 979, 804, 648 and 625 cm<sup>-1</sup>; <sup>1</sup>H NMR (CDCl<sub>3</sub>)  $\delta$  7.01 (1H, d,  $J = 8.0$  Hz), 6.54 (1H, dd,  $J = 8.0, 4.0$  Hz), 6.45 (1H, d,  $J = 2.4$ , Hz), 4.95 (1H, dd,  $J = 12.0, 4.0$  Hz), 4.60 (1H, dd,  $J = 12.0, 8.0$  Hz), 3.78 (3H, s, Ar-OCH<sub>3</sub>), 3.66-3.59 (1H, m), 3.26 (3H, s, OCH<sub>3</sub>), 2.18 (1H, d,  $J = 16.0$  Hz), 2.04 (1H, dd,  $J = 14.0, 8.0$  Hz), 1.55 (3H, s, CH<sub>3</sub>); <sup>13</sup>C NMR (CDCl<sub>3</sub>, DEPT-135)  $\delta$  160.1 (C), 152.7 (C), 129.5 (CH), 112.2 (C), 108.3 (CH), 102.4 (CH), 98.6 (C), 80.8 (CH<sub>2</sub>), 55.2 (CH<sub>3</sub>, OCH<sub>3</sub>), 48.8 (CH<sub>3</sub>, OCH<sub>3</sub>), 34.0 (CH<sub>2</sub>), 31.5 (CH), 23.0 (CH<sub>3</sub>); LRMS  $m/z$  266 (M - H<sup>+</sup>), calcd for C<sub>13</sub>H<sub>17</sub>NO<sub>5</sub> 267.1107; HRMS  $m/z$  290.1003 (M + Na), calcd for C<sub>13</sub>H<sub>17</sub>NO<sub>5</sub>Na 290.1004; Anal. calcd for C<sub>13</sub>H<sub>17</sub>NO<sub>5</sub> (267.1107): C, 58.42; H, 6.41; N, 5.24. Found: C, 58.50; H, 6.35; N, 5.21%.

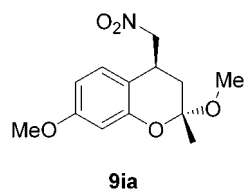

**(2R, 4S)-2,7-Dimethoxy-2-methyl-4-nitromethyl-chroman (9ia):** Prepared following the procedure C and purified by column chromatography using EtOAc/hexane and isolated as solid. The enantiomeric excess (ee) was determined by chiral stationary phase HPLC using a Daicel Chiralpak AS-H column (hexane/2-propanol = 95:5, flow rate 1.0 mL/min,  $\lambda$  = 254 nm),  $t_R$  = 9.60 min (major),  $t_R$  = 11.33 min (minor). Mp 76 °C;  $[\alpha]_D^{25} = -45.5^\circ$  ( $c = 0.18$  g/100 mL, CHCl<sub>3</sub>, 80% ee); IR (Neat):  $\nu_{\max}$  2922, 2851, 1621, 1551 (NO<sub>2</sub>), 1511, 1381, 1301, 1279, 1223, 1192, 1157, 1117, 1059, 1030, 859, 795, 675, and 649 cm<sup>-1</sup>; <sup>1</sup>H NMR (CDCl<sub>3</sub>)  $\delta$  6.99 (1H, dd,  $J = 8.4, 0.8$  Hz), 6.52 (1H, dd,  $J = 8.6, 2.4$  Hz), 6.44 (1H, d,  $J = 4.8$  Hz), 4.89 (1H, dd,  $J = 12.0, 4.8$  Hz), 4.42 (1H, dd,  $J = 12.4, 9.2$  Hz), 3.90-3.81 (1H, m), 3.76 (3H, s, Ar-OCH<sub>3</sub>), 3.24 (3H, s, OCH<sub>3</sub>), 2.19 (1H, dd,  $J = 13.2, 6.0$  Hz), 1.76 (1H, dd,  $J = 13.0, 12.0$  Hz), 1.55 (3H, s, CH<sub>3</sub>); <sup>13</sup>C NMR (CDCl<sub>3</sub>, DEPT-135)  $\delta$  159.8 (C), 153.1 (C), 126.4 (CH), 112.7 (C), 107.8 (CH), 102.7 (CH), 98.2 (C), 79.3 (CH<sub>2</sub>), 55.2 (CH<sub>3</sub>, OCH<sub>3</sub>), 49.0 (CH<sub>3</sub>, OCH<sub>3</sub>), 36.7 (CH<sub>2</sub>), 29.8 (CH), 22.8 (CH<sub>3</sub>); LRMS  $m/z$  266 (M - H<sup>+</sup>), calcd for C<sub>13</sub>H<sub>17</sub>NO<sub>5</sub> 267.1107; HRMS  $m/z$  290.1002 (M + Na), calcd for C<sub>13</sub>H<sub>17</sub>NO<sub>5</sub>Na 290.1004; Anal. calcd for C<sub>13</sub>H<sub>17</sub>NO<sub>5</sub> (267.1107): C, 58.42; H, 6.41; N, 5.24. Found: C, 58.51; H, 6.38; N, 5.31%.

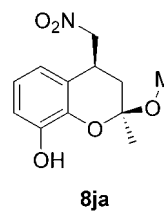

**(2S, 4S)-2-Methoxy-2-methyl-4-nitromethyl-chroman-8-ol (8ja):** Prepared following the procedure C and purified by column chromatography using EtOAc/hexane and

isolated as liquid. The enantiomeric excess (ee) was determined by chiral stationary phase HPLC using a Daicel Chiralpak AD-H column (hexane/2-propanol = 98:2, flow rate 0.5 mL/min,  $\lambda = 254$  nm),  $t_R = 59.74$  min (minor),  $t_R = 64.77$  min (major).  $[\alpha]_D^{25} = +14.2^\circ$  ( $c = 0.25$  g/100 mL,  $\text{CHCl}_3$ , 83% ee); IR (Neat):  $\nu_{\max}$  3509 (OH), 1596, 1547 ( $\text{NO}_2$ ), 1474, 1426, 1378, 1239, 1202, 1148, 1119, 1058, 949, 863, 789, 731, 651, and 606  $\text{cm}^{-1}$ ;  $^1\text{H}$  NMR ( $\text{CDCl}_3$ )  $\delta$  6.86 (2H, d,  $J = 3.5$  Hz), 6.68 (1H, d,  $J = 4.0$  Hz), 5.58 (1H, br s, Ar-OH), 4.99 (1H, dd,  $J = 12.2, 7.6$  Hz), 4.63 (1H, dd,  $J = 12.7, 4.5$  Hz), 3.71 (1H, d,  $J = 6.5$  Hz), 3.24 (3H, s,  $\text{OCH}_3$ ), 2.23 (1H, d,  $J = 14.5$  Hz), 2.10 (1H, dd,  $J = 14.5, 7.0$  Hz), 1.61 (3H, s,  $\text{CH}_3$ );  $^{13}\text{C}$  NMR ( $\text{CDCl}_3$ , DEPT-135)  $\delta$  145.2 (C), 138.9 (C), 121.6 (CH), 120.5 (C), 119.7 (CH), 113.9 (CH), 99.6 (C), 80.4 ( $\text{CH}_2$ ), 48.9 ( $\text{CH}_3$ ), 34.2 ( $\text{CH}_2$ ), 31.7 (CH), 23.0 ( $\text{CH}_3$ ); LRMS  $m/z$  252.15 ( $\text{M} - \text{H}^+$ ), calcd for  $\text{C}_{12}\text{H}_{15}\text{NO}_5$  253.0950; HRMS  $m/z$  276.0841 ( $\text{M} + \text{Na}$ ), calcd for  $\text{C}_{12}\text{H}_{15}\text{NO}_5\text{Na}$  276.0848; Anal. calcd for  $\text{C}_{12}\text{H}_{15}\text{NO}_5$  (253.0950): C, 56.91; H, 5.97; N, 5.53. Found: C, 56.95; H, 5.88; N, 5.65%.

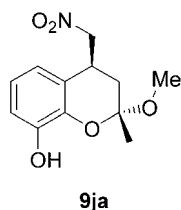

**(2R, 4S)-2-Methoxy-2-methyl-4-nitromethyl-chroman-8-ol (9ja):** Prepared following the procedure C and purified by column chromatography using EtOAc/hexane and isolated as solid. The enantiomeric excess (ee) was determined by chiral stationary phase HPLC using a Daicel Chiralpak AD-H column (hexane/2-propanol = 95:5, flow rate 1.0 mL/min,  $\lambda = 254$  nm),  $t_R = 17.93$  min (major),  $t_R = 23.49$  min (minor). Mp 92 °C;  $[\alpha]_D^{25} = -54.1^\circ$  ( $c = 0.27$  g/100 mL,  $\text{CHCl}_3$ , 82% ee); IR (Neat):  $\nu_{\max}$  3348 (OH), 2940, 1596, 1547 ( $\text{NO}_2$ ), 1475, 1437, 1382, 1255, 1219, 1194, 1105, 1067, 1031, 954, 926, 864, 728, 651, 630, and 608  $\text{cm}^{-1}$ ;  $^1\text{H}$  NMR ( $\text{CDCl}_3$ )  $\delta$  6.86-6.85 (2H, m), 6.66-6.64 (1H, m), 5.75 (1H, br s, Ar-OH), 4.93 (1H, dd,  $J = 12.2, 5.0$  Hz), 4.46 (1H, dd,  $J = 12.2, 9.5$  Hz), 3.96-3.90 (1H, m), 3.23 (3H, s,  $\text{OCH}_3$ ), 2.25 (1H, dd,  $J = 13.5, 6.0$  Hz), 1.85 (1H, dd,  $J = 13.5, 12.0$  Hz), 1.62 (3H, s,  $\text{CH}_3$ );  $^{13}\text{C}$  NMR ( $\text{CDCl}_3$ , DEPT-135)  $\delta$  145.3 (C), 139.0 (C), 121.5 (CH), 120.9 (C), 116.7 (CH), 113.8 (CH), 99.0 (C), 78.9 ( $\text{CH}_2$ ), 49.2 ( $\text{CH}_3$ ,  $\text{OCH}_3$ ), 36.8 ( $\text{CH}_2$ ), 30.1 (CH), 22.8 ( $\text{CH}_3$ ); LRMS  $m/z$  252.15 ( $\text{M} - \text{H}^+$ ), calcd for  $\text{C}_{12}\text{H}_{15}\text{NO}_5$  253.0950; HRMS  $m/z$  276.0843 ( $\text{M} + \text{Na}$ ), calcd for  $\text{C}_{12}\text{H}_{15}\text{NO}_5\text{Na}$  276.0848; Anal. calcd for  $\text{C}_{12}\text{H}_{15}\text{NO}_5$  (253.0950): C, 56.91; H, 5.97; N, 5.53. Found: C, 56.95; H, 5.91; N, 5.49%.

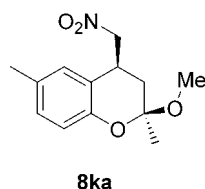

**(2S, 4S)-2-Methoxy-2,6-dimethyl-4-nitromethyl-chroman (8ka):** Prepared following the procedure C and purified by column chromatography using EtOAc/hexane and isolated as solid. The enantiomeric excess (ee) was determined by chiral stationary phase HPLC using a Daicel Chiralpak AS-H column (hexane/2-propanol = 97:3, flow rate 1.0 mL/min,  $\lambda = 254$  nm),  $t_R = 5.02$  min (major),  $t_R = 5.70$  min (minor). Mp 60 °C;  $[\alpha]_D^{25} = +16.0^\circ$  ( $c = 0.30$  g/100 mL,  $\text{CHCl}_3$ , 92% ee); IR (Neat):  $\nu_{\max}$  2951, 1547 ( $\text{NO}_2$ ), 1498, 1378, 1251, 1213, 1153, 1123, 1056, 882 and 819  $\text{cm}^{-1}$ ;  $^1\text{H}$  NMR ( $\text{CDCl}_3$ )  $\delta$  6.99 (1H,

This journal is (c) The Royal Society of Chemistry 2010

dd,  $J = 8.4, 2.0$  Hz), 6.92 (1H, d,  $J = 1.6$  Hz), 6.79 (1H, d,  $J = 8.0$  Hz), 5.00 (1H, dd,  $J = 12.8, 9.6$  Hz), 4.61 (1H, dd,  $J = 12.8, 5.6$  Hz), 3.66-3.61 (1H, m), 3.22 (3H, s, OCH<sub>3</sub>), 2.26 (3H, s, Ar-CH<sub>3</sub>), 2.17 (1H, dd,  $J = 14.4, 1.2$  Hz), 2.02 (1H, dd,  $J = 14.6, 6.8$  Hz), 1.53 (3H, s, CH<sub>3</sub>); <sup>13</sup>C NMR (CDCl<sub>3</sub>, DEPT-135)  $\delta$  149.6 (C), 130.7 (C), 129.5 (CH), 129.1 (CH), 119.8 (C), 117.5 (CH), 98.4 (C), 80.7 (CH<sub>2</sub>), 48.6 (CH<sub>3</sub>, OCH<sub>3</sub>), 33.9 (CH<sub>2</sub>), 32.0 (CH), 23.0 (CH<sub>3</sub>), 20.4 (CH<sub>3</sub>); LRMS  $m/z$  250 (M - H<sup>+</sup>), calcd for C<sub>13</sub>H<sub>17</sub>NO<sub>4</sub> 251.1158; HRMS  $m/z$  274.1050 (M + Na), calcd for C<sub>13</sub>H<sub>17</sub>NO<sub>4</sub>Na 274.1055; Anal. calcd for C<sub>13</sub>H<sub>17</sub>NO<sub>4</sub> (251.1158): C, 62.14; H, 6.82; N, 5.57. Found: C, 62.21; H, 6.78; N, 5.61%.

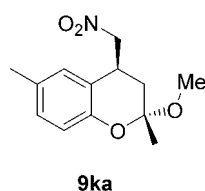

**(2R, 4S)-2-Methoxy-2,6-dimethyl-4-nitromethyl-chroman (9ka):** Prepared following the procedure C and purified by column chromatography using EtOAc/hexane and isolated as solid. The enantiomeric excess (ee) was determined by chiral stationary phase HPLC using a Daicel Chiralpak AS-H column (hexane/2-propanol = 97:3, flow rate 1.0 mL/min,  $\lambda = 254$  nm),  $t_R = 6.58$  min (major),  $t_R = 7.07$  min (minor). Mp 58 °C;  $[\alpha]_D^{25} = -42.5^\circ$  ( $c = 0.20$  g/100 mL, CHCl<sub>3</sub>, 89% ee); IR (Neat):  $\nu_{\max}$  2990, 1551 (NO<sub>2</sub>), 1498, 1435, 1378, 1284, 1228, 1179, 1067, 887, 820 and 639 cm<sup>-1</sup>; <sup>1</sup>H NMR (CDCl<sub>3</sub>)  $\delta$  6.99-6.97 (1H, m), 6.89 (1H, br s), 6.78 (1H, d,  $J = 8.4$  Hz), 4.92 (1H, dd,  $J = 12.4, 4.8$  Hz), 4.42 (1H, dd,  $J = 12.2, 9.2$  Hz), 3.92-3.84 (1H, m), 3.21 (3H, s, OCH<sub>3</sub>), 2.26 (3H, s, Ar-CH<sub>3</sub>), 2.19 (1H, dd,  $J = 13.2, 6.4$  Hz), 1.78 (1H, dd,  $J = 13.2, 12.0$  Hz), 1.54 (3H, s, CH<sub>3</sub>); <sup>13</sup>C NMR (CDCl<sub>3</sub>, DEPT-135)  $\delta$  149.8 (C), 130.5 (C), 129.2 (CH), 126.2 (CH), 120.2 (C), 117.6 (CH), 97.8 (C), 79.2 (CH<sub>2</sub>), 48.9 (CH<sub>3</sub>), 36.6 (CH<sub>2</sub>), 30.2 (CH), 22.8 (CH<sub>3</sub>), 20.6 (CH<sub>3</sub>); LRMS  $m/z$  250 (M - H<sup>+</sup>), calcd for C<sub>13</sub>H<sub>17</sub>NO<sub>4</sub> 251.1158; HRMS  $m/z$  274.1051 (M + Na), calcd for C<sub>13</sub>H<sub>17</sub>NO<sub>4</sub>Na 274.1055; Anal. calcd for C<sub>13</sub>H<sub>17</sub>NO<sub>4</sub> (251.1158): C, 62.14; H, 6.82; N, 5.57. Found: C, 62.25; H, 6.88; N, 5.51%.

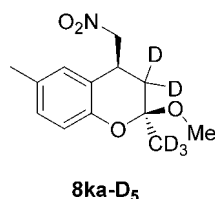

**(2S, 4S)-2-Methoxy-2,6-dimethyl-4-nitromethyl-chroman-1,1,1,3,3,3-d<sub>5</sub> (8ka-d<sub>5</sub>):** Prepared following the procedure C and purified by column chromatography using EtOAc/hexane and isolated as solid. The enantiomeric excess (ee) was determined by chiral stationary phase HPLC using a Daicel Chiralpak AS-H column (hexane/2-propanol = 97:3, flow rate 1.0 mL/min,  $\lambda = 254$  nm),  $t_R = 5.17$  min (major),  $t_R = 6.12$  min (minor). Mp 56 °C;  $[\alpha]_D^{25} = +23.0^\circ$  ( $c = 0.27$  g/100 mL, CHCl<sub>3</sub>, 89% ee); IR (Neat):  $\nu_{\max}$  2962, 1539 (NO<sub>2</sub>), 1498, 1378, 1235, 1178, 1143, 1075, 1035 and 817 cm<sup>-1</sup>; <sup>1</sup>H NMR (CDCl<sub>3</sub>)  $\delta$  7.01 (1H, d,  $J = 8.0$  Hz), 6.94 (1H, s), 6.81 (1H, d,  $J = 8.4$  Hz), 5.00 (1H, d,  $J = 9.2$  Hz, proton resolution is very poor), 4.61 (1H, s, proton resolution is very poor), 3.62 (1H, s), 3.24 (3H, s, OCH<sub>3</sub>), 2.28 (3H, s, Ar-CH<sub>3</sub>); <sup>13</sup>C NMR (CDCl<sub>3</sub>, DEPT-135)  $\delta$  149.6 (C), 130.7 (C), 129.5 (CH), 129.1 (CH), 119.7 (C), 117.5 (CH), 98.3 (C), 80.7 (CH<sub>2</sub>, peak resolution is very poor), 48.6 (CH<sub>3</sub>, OCH<sub>3</sub>), 33.9 (CH<sub>2</sub>, peak resolution is very poor), 31.7 (CH),

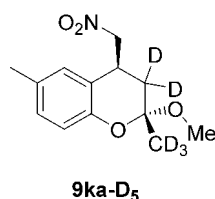

23.0 (CH<sub>3</sub>, peak resolution is very poor), 20.5 (CH<sub>3</sub>); LRMS m/z 257 (M + H<sup>+</sup>), calcd for C<sub>13</sub>H<sub>12</sub>D<sub>5</sub>NO<sub>4</sub> 256.1466.

**(2R, 4S)-2-Methoxy-2,6-dimethyl-4-nitromethyl-chroman-1,1,1,3,3-d<sub>5</sub> (9ka-d<sub>5</sub>):** Prepared following the procedure C and purified by column chromatography using EtOAc/hexane and isolated as solid. The enantiomeric excess (ee) was determined by chiral stationary phase HPLC using a Daicel Chiralpak AS-H column (hexane/2-propanol = 97:3, flow rate 1.0 mL/min, λ = 254 nm), t<sub>R</sub> = 6.84 min (major), t<sub>R</sub> = 7.41 min (minor). Mp 66 °C; [α]<sub>D</sub><sup>25</sup> = -54.9° (c = 0.37 g/100 mL, CHCl<sub>3</sub>, 91% ee); IR (Neat): ν<sub>max</sub> 2939, 1543 (NO<sub>2</sub>), 1496, 1378, 1248, 1196, 1072, 1037, 820 and 642 cm<sup>-1</sup>; <sup>1</sup>H NMR (CDCl<sub>3</sub>) δ 7.00 (1H, d, J = 8.0 Hz), 6.91 (1H, s), 6.80 (1H, d, J = 8.2 Hz), 4.92 (1H, s, proton resolution is very poor), 4.43 (1H, d, J = 9.6 Hz, proton resolution is very poor), 3.87 (1H, s), 3.23 (3H, s, OCH<sub>3</sub>), 2.28 (3H, s, Ar-CH<sub>3</sub>); <sup>13</sup>C NMR (CDCl<sub>3</sub>, DEPT-135) δ 149.8 (C), 130.5 (C), 129.3 (CH), 126.2 (CH), 120.2 (C), 117.7 (CH), 97.7 (C), 79.0 (CH<sub>2</sub>, peak resolution is very poor), 49.0 (CH<sub>3</sub>, OCH<sub>3</sub>), 36.0 (CH<sub>2</sub>, peak resolution is very poor), 30.0 (CH), 22.1 (CH<sub>3</sub>, peak resolution is very poor), 20.7 (CH<sub>3</sub>); LRMS m/z 257.10 (M + H<sup>+</sup>), calcd for C<sub>13</sub>H<sub>12</sub>D<sub>5</sub>NO<sub>4</sub> 256.1466.

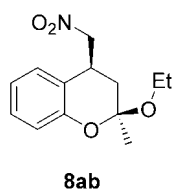

**(2S, 4S)-2-Ethoxy-2-methyl-4-nitromethyl-chroman (8ab):** Prepared following the procedure C and purified by column chromatography using EtOAc/hexane and isolated as liquid. The enantiomeric excess (ee) was determined by chiral stationary phase HPLC using a Daicel Chiralcel OD-H column (hexane/2-propanol = 90:10, flow rate 1.0 mL/min, λ = 254 nm), t<sub>R</sub> = 5.12 min (minor), t<sub>R</sub> = 5.52 min (major). [α]<sub>D</sub><sup>25</sup> = +74.8° (c = 0.67 g/100 mL, CHCl<sub>3</sub>, 80% ee); IR (Neat): ν<sub>max</sub> 2974, 2937, 1582, 1550 (NO<sub>2</sub>), 1488, 1454, 1379, 1247, 1156, 1126, 1101, 1057 and 758 cm<sup>-1</sup>; <sup>1</sup>H NMR (CDCl<sub>3</sub>) δ 7.18 (1H, dt, J = 7.2, 1.0 Hz), 7.11 (1H, br d, J = 7.2 Hz), 6.94 (1H, br t, J = 7.2 Hz), 6.87 (1H, d, J = 8.0 Hz), 5.06 (1H, dd, J = 13.0, 9.2 Hz), 4.65 (1H, dd, J = 12.8, 5.6 Hz), 3.69 (1H, q, J = 6.4 Hz), 3.59 (2H, q, J = 6.8 Hz, OCH<sub>2</sub>CH<sub>3</sub>), 2.22 (1H, d, J = 14.4 Hz), 2.04 (1H, dd, J = 14.4, 6.8 Hz), 1.56 (3H, s, CH<sub>3</sub>), 1.03 (3H, t, J = 6.8 Hz, OCH<sub>2</sub>CH<sub>3</sub>); <sup>13</sup>C NMR (CDCl<sub>3</sub>, DEPT-135) δ 152.0 (C), 128.9 (CH), 128.8 (CH), 121.3 (CH), 120.2 (C), 117.7 (CH), 98.4 (C), 80.9 (CH<sub>2</sub>), 56.8 (CH<sub>2</sub>, OCH<sub>2</sub>CH<sub>3</sub>), 34.2 (CH<sub>2</sub>), 32.1 (CH), 23.7 (CH<sub>3</sub>), 15.4 (CH<sub>3</sub>, OCH<sub>2</sub>CH<sub>3</sub>); LRMS m/z 250 (M - H<sup>+</sup>), calcd for C<sub>13</sub>H<sub>17</sub>NO<sub>4</sub> 251.1158; Anal. calcd for C<sub>13</sub>H<sub>17</sub>NO<sub>4</sub> (251.1158): C, 62.14; H, 6.82; N, 5.57. Found: C, 62.25; H, 6.88; N, 5.61%.

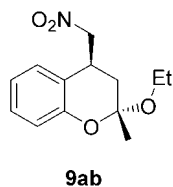

**(2R, 4S)-2-Ethoxy-2-methyl-4-nitromethyl-chroman (9ab):** Prepared following the procedure C and purified by column chromatography using EtOAc/hexane and isolated as solid. The enantiomeric excess (ee) was determined by chiral stationary phase HPLC using a Daicel Chiralcel OD-H column (hexane/2-propanol = 90:10, flow rate 1.0

This journal is (c) The Royal Society of Chemistry 2010

mL/min,  $\lambda = 254$  nm),  $t_R = 5.72$  min (major),  $t_R = 8.69$  min (minor). Mp 60 °C;  $[\alpha]_D^{25} = -54.8^\circ$  ( $c = 0.83$  g/100 mL,  $\text{CHCl}_3$ , 80% ee); IR (Neat):  $\nu_{\max}$  2979, 1552 ( $\text{NO}_2$ ), 1489, 1452, 1379, 1256, 1224, 1188, 1097, 1063, 938, 879, 756 and 655  $\text{cm}^{-1}$ ;  $^1\text{H NMR}$  ( $\text{CDCl}_3$ )  $\delta$  7.17 (1H, t,  $J = 7.6$  Hz), 7.10 (1H, d,  $J = 7.6$  Hz), 6.93 (1H, t,  $J = 7.2$  Hz), 6.86 (1H, d,  $J = 8.0$  Hz), 4.93 (1H, dd,  $J = 12.4, 4.8$  Hz), 4.47 (1H, dd,  $J = 12.0, 9.2$  Hz), 4.00-3.92 (1H, m), 3.64-3.47 (2H, m,  $\text{OCH}_2\text{CH}_3$ ), 2.22 (1H, dd,  $J = 13.4, 6.0$  Hz), 1.79 (1H, t,  $J = 12.8$  Hz), 1.57 (3H, s,  $\text{CH}_3$ ), 0.97 (3H, t,  $J = 7.2$  Hz,  $\text{OCH}_2\text{CH}_3$ );  $^{13}\text{C NMR}$  ( $\text{CDCl}_3$ , DEPT-135)  $\delta$  152.2 (C), 128.5 (CH), 125.7 (CH), 121.1 (CH), 120.6 (C), 117.8 (CH), 97.9 (C), 79.2 ( $\text{CH}_2$ ), 56.8 ( $\text{CH}_2$ ,  $\text{OCH}_2\text{CH}_3$ ), 36.8 ( $\text{CH}_2$ ), 30.3 (CH), 23.7 ( $\text{CH}_3$ ), 15.3 ( $\text{CH}_3$ ,  $\text{OCH}_2\text{CH}_3$ ); LRMS  $m/z$  250 ( $\text{M} - \text{H}^+$ ), calcd for  $\text{C}_{13}\text{H}_{17}\text{NO}_4$  251.1158; HRMS  $m/z$  274.1053 ( $\text{M} + \text{Na}$ ), calcd for  $\text{C}_{13}\text{H}_{17}\text{NO}_4\text{Na}$  274.1055; Anal. calcd for  $\text{C}_{13}\text{H}_{17}\text{NO}_4$  (251.1158): C, 62.14; H, 6.82; N, 5.57. Found: C, 62.10; H, 6.88; N, 5.65%.

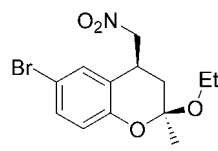

**8eb**

**(2S, 4S)-6-Bromo-2-ethoxy-2-methyl-4-nitromethyl-chroman (8eb):** Prepared following the procedure C and purified by column chromatography using EtOAc/hexane and isolated as liquid. The enantiomeric excess (ee) was determined by chiral stationary phase HPLC using a Daicel Chiralpak AS-H column (hexane/2-propanol = 90:10, flow rate 1.0 mL/min,  $\lambda = 254$  nm),  $t_R = 4.54$  min (minor),  $t_R =$

4.90 min (major).  $[\alpha]_D^{25} = +65.5^\circ$  ( $c = 0.83$  g/100 mL,  $\text{CHCl}_3$ , 88% ee); IR (Neat):  $\nu_{\max}$  2974, 2934, 2893, 1739, 1545 ( $\text{NO}_2$ ), 1483, 1381, 1253, 1215, 1180, 1059, 951, 881, 818, 739, 681, 582 and 490  $\text{cm}^{-1}$ ;  $^1\text{H NMR}$  ( $\text{CDCl}_3$ )  $\delta$  7.30-7.26 (2H, m), 6.76 (1H, d,  $J = 8.8$  Hz), 5.07 (1H, dd,  $J = 13.2, 9.2$  Hz), 4.61 (1H, dd,  $J = 13.0, 5.2$  Hz), 3.70-3.61 (1H, m), 3.59-3.51 (2H, m,  $\text{OCH}_2\text{CH}_3$ ), 2.20 (1H, dd,  $J = 14.8, 1.2$  Hz), 2.01 (1H, dd,  $J = 14.6, 7.2$  Hz), 1.56 (3H, s,  $\text{CH}_3$ ), 1.03 (3H, t,  $J = 8.4$  Hz,  $\text{OCH}_2\text{CH}_3$ );  $^{13}\text{C NMR}$  ( $\text{CDCl}_3$ , DEPT-135)  $\delta$  151.2 (C), 131.8 (CH), 131.5 (CH), 122.4 (C), 119.6 (CH), 113.3 (C), 98.6 (C), 80.5 ( $\text{CH}_2$ ), 57.0 ( $\text{CH}_2$ ,  $\text{OCH}_2\text{CH}_3$ ), 33.9 ( $\text{CH}_2$ ), 31.8 (CH), 23.6 ( $\text{CH}_3$ ), 15.3 ( $\text{CH}_3$ ,  $\text{OCH}_2\text{CH}_3$ ); LRMS  $m/z$  330.15 ( $\text{M} + \text{H}^+$ ), calcd for  $\text{C}_{13}\text{H}_{16}\text{BrNO}_4$  329.0263; Anal. calcd for  $\text{C}_{13}\text{H}_{16}\text{BrNO}_4$  (329.0263): C, 47.29; H, 4.88; N, 4.24. Found: C, 47.32; H, 4.84; N, 4.28%.

**(2R, 4S)-6-Bromo-2-ethoxy-2-methyl-4-nitromethyl-chroman (9eb):** Prepared following the procedure C and purified by column chromatography using EtOAc/hexane and isolated as solid.

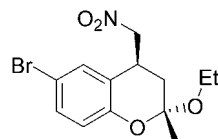

**9eb**

The enantiomeric excess (ee) was determined by chiral stationary phase HPLC using a Daicel Chiralpak AS-H column (hexane/2-propanol = 90:10, flow rate 1.0 mL/min,  $\lambda = 254$  nm),  $t_R = 5.34$  min (major),  $t_R = 6.09$  min (minor). Mp 70 °C;  $[\alpha]_D^{25} = -41.2^\circ$

( $c = 0.83$  g/100 mL,  $\text{CHCl}_3$ , 82% ee); IR (Neat):  $\nu_{\max}$  2974, 2922, 1736, 1548 ( $\text{NO}_2$ ), 1483, 1381, 1217, 1064, 939, 885, 814, 673 and 470  $\text{cm}^{-1}$ ;  $^1\text{H NMR}$  ( $\text{CDCl}_3$ )  $\delta$  7.29-7.26 (1H, m), 7.23-7.22 (1H, m), 6.75 (1H, d,  $J = 8.8$  Hz), 4.89 (1H, dd,  $J = 12.2, 4.4$  Hz), 4.48 (1H, dd,  $J = 12.4, 9.2$  Hz), 3.97-3.89 (1H, m),

This journal is (c) The Royal Society of Chemistry 2010

3.68-3.44 (2H, m, OCH<sub>2</sub>CH<sub>3</sub>), 2.21 (1H, dd, *J* = 13.2, 6.0 Hz), 1.77 (1H, t, *J* = 12.4 Hz), 1.56 (3H, s, CH<sub>3</sub>), 0.98 (3H, t, *J* = 7.2 Hz, OCH<sub>2</sub>CH<sub>3</sub>); <sup>13</sup>C NMR (CDCl<sub>3</sub>, DEPT-135) δ 151.5 (C), 131.5 (CH), 128.7 (CH), 122.8 (C), 119.6 (CH), 113.2 (C), 98.2 (C), 78.8 (CH<sub>2</sub>), 57.0 (CH<sub>2</sub>, OCH<sub>2</sub>CH<sub>3</sub>), 36.4 (CH<sub>2</sub>), 30.2 (CH), 23.5 (CH<sub>3</sub>), 15.2 (CH<sub>3</sub>, OCH<sub>2</sub>CH<sub>3</sub>); LRMS *m/z* 330.15 (M + H<sup>+</sup>), calcd for C<sub>13</sub>H<sub>16</sub>BrNO<sub>4</sub> 329.0263; Anal. calcd for C<sub>13</sub>H<sub>16</sub>BrNO<sub>4</sub> (329.0263): C, 47.29; H, 4.88; N, 4.24. Found: C, 47.32; H, 4.91; N, 4.31%.

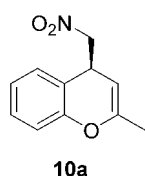

**(4S)-2-Methyl-4-nitromethyl-4H-chromene (10a):** Prepared following the procedure **D** and purified by column chromatography using EtOAc/hexane and isolated as solid. The enantiomeric excess (*ee*) was determined by chiral stationary phase HPLC using a Daicel Chiralcel OD-H column (hexane/2-propanol = 97:3, flow rate 1.0 mL/min, λ = 254 nm), *t<sub>R</sub>*

= 8.09 min (major), *t<sub>R</sub>* = 8.74 min (minor). Mp 58 °C; [α]<sub>D</sub><sup>25</sup> = -15.5° (*c* = 0.23 g/100 mL, CHCl<sub>3</sub>, 81% *ee*); IR (Neat): ν<sub>max</sub> 3623, 3602, 1688, 1544 (NO<sub>2</sub>), 1485, 1380, 1314, 1263, 1227, 1193, 1105, 1069, 1022, 801 and 767 cm<sup>-1</sup>; <sup>1</sup>H NMR (CDCl<sub>3</sub>) δ 7.23 (1H, t, *J* = 7.6 Hz), 7.11-7.05 (2H, m), 6.96 (1H, d, *J* = 8.4 Hz), 4.75 (1H, d, *J* = 3.6 Hz), 4.45 (1H, dd, *J* = 11.6, 5.6 Hz), 4.43-4.38 (1H, m), 4.27-4.26 (1H, m), 1.95 (3H, s, CH<sub>3</sub>); <sup>13</sup>C NMR (CDCl<sub>3</sub>, DEPT-135) δ 151.6 (C), 150.7 (C), 128.8 (CH), 128.0 (CH), 123.7 (CH), 118.2 (C), 116.9 (CH), 94.5 (CH), 82.0 (CH<sub>2</sub>), 33.9 (CH), 19.3 (CH<sub>3</sub>); LRMS *m/z* 204 (M - H<sup>+</sup>), calcd for C<sub>11</sub>H<sub>11</sub>NO<sub>3</sub> 205.0739; Anal. calcd for C<sub>11</sub>H<sub>11</sub>NO<sub>3</sub> (205.0739): C, 64.38; H, 5.40; N, 6.83. Found: C, 64.25; H, 5.46; N, 6.89%.

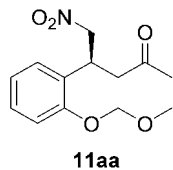

**(4S)-4-(2-Methoxymethoxy-phenyl)-5-nitro-pentan-2-one (11aa):** Prepared following the procedure **E** and purified by column chromatography using EtOAc/hexane and isolated as liquid. [α]<sub>D</sub><sup>25</sup> = -44.6° (*c* = 0.20 g/100 mL, CHCl<sub>3</sub>, 82% *ee*); IR (Neat): ν<sub>max</sub> 2918, 2851, 1712 (C=O), 1550 (NO<sub>2</sub>), 1489, 1375, 1232, 1151, 1078, 999 and 758 cm<sup>-1</sup>;

<sup>1</sup>H NMR (CDCl<sub>3</sub>) δ 7.23 (1H, dt, *J* = 7.2, 2.3 Hz), 7.15 (1H, dd, *J* = 7.6, 1.6 Hz), 7.11 (1H, br d, *J* = 7.6 Hz), 6.96 (1H, dt, *J* = 7.2, 1.6 Hz), 5.25 (2H, s), 4.74 (2H, d, *J* = 6.8 Hz), 4.30 (1H, quintet, *J* = 6.8 Hz), 3.52 (3H, s, OCH<sub>3</sub>), 3.01 (2H, dABq, *J* = 17.6, 7.6 Hz), 2.14 (3H, s, CH<sub>3</sub>); <sup>13</sup>C NMR (CDCl<sub>3</sub>, DEPT-135) δ 205.9 (C, C=O), 154.8 (C), 129.0 (CH), 128.9 (CH), 126.9 (C), 122.0 (CH), 114.3 (CH), 94.4 (CH<sub>2</sub>), 78.0 (CH<sub>2</sub>), 56.3 (CH<sub>3</sub>, OCH<sub>3</sub>), 44.7 (CH<sub>2</sub>), 34.7 (CH), 30.2 (CH<sub>3</sub>); LRMS *m/z* 268.50 (M + H<sup>+</sup>), calcd for C<sub>13</sub>H<sub>17</sub>NO<sub>5</sub> 267.1107; Anal. calcd for C<sub>13</sub>H<sub>17</sub>NO<sub>5</sub> (267.1107): C, 58.24; H, 6.41; N, 5.24. Found: C, 58.25; H, 6.44; N, 5.32%.

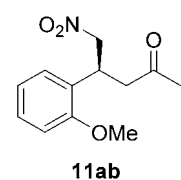

**(4S)-4-(2-Methoxy-phenyl)-5-nitro-pentan-2-one (11ab):** Prepared following the procedure **J** and purified by column chromatography using EtOAc/hexane and isolated as liquid. The enantiomeric excess (*ee*) was determined by chiral stationary phase HPLC using a Daicel Chiralpak AS-H column (hexane/2-propanol = 60:40, flow rate 1.0



This journal is (c) The Royal Society of Chemistry 2010

mL/min,  $\lambda = 210$  nm),  $t_R = 10.62$  min (major),  $t_R = 12.00$  min (minor).  $[\alpha]_D^{25} = +33.2^\circ$  ( $c = 0.50$  g/100 mL, CHCl<sub>3</sub>, 80% ee); IR (Neat):  $\nu_{\max}$  1716 (C=O), 1551 (NO<sub>2</sub>), 1494, 1462, 1376, 1245, 1165, 1122, 1028, 910 and 656 cm<sup>-1</sup>; <sup>1</sup>H NMR (CDCl<sub>3</sub>)  $\delta$  7.25-7.21 (1H, m), 7.12 (1H, d,  $J = 4.0$  Hz), 6.90-6.86 (2H, m), 4.75-4.66 (2H, m), 4.20 (1H, quintet,  $J = 6.8$  Hz), 3.84 (3H, s, OCH<sub>3</sub>), 3.04-2.91 (2H, m), 2.10 (3H, s, CH<sub>3</sub>); <sup>13</sup>C NMR (CDCl<sub>3</sub>, DEPT-135)  $\delta$  206.1 (C, C=O), 156.9 (C), 129.1 (CH), 128.8 (CH), 126.2 (C), 120.6 (CH), 110.8 (CH), 77.6 (CH<sub>2</sub>), 55.1 (CH<sub>3</sub>, OCH<sub>3</sub>), 44.3 (CH<sub>2</sub>), 35.2 (CH), 30.0 (CH<sub>3</sub>).

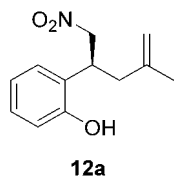

**(1S)-2-(3-Methyl-1-nitromethyl-but-3-enyl)-phenol (12a):** Prepared following the procedure F and purified by column chromatography using EtOAc/hexane and isolated as liquid. The enantiomeric excess (ee) was determined by chiral stationary phase HPLC using a Daicel Chiralpak AS-H column (hexane/2-propanol = 94:6, flow rate 0.8 mL/min,  $\lambda = 254$  nm),  $t_R = 7.57$  min (major),  $t_R = 8.75$  min (minor).  $[\alpha]_D^{25} = -26.5^\circ$  ( $c = 0.20$  g/100 mL, CHCl<sub>3</sub>, 82% ee); IR (Neat):  $\nu_{\max}$  3518 (OH), 1600, 1550 (NO<sub>2</sub>), 1454, 1378, 1260, 1105, 894, 755, 679, 646 and 601 cm<sup>-1</sup>; <sup>1</sup>H NMR (CDCl<sub>3</sub>)  $\delta$  7.13-7.10 (2H, m), 6.89 (1H, t,  $J = 7.2$  Hz), 6.72 (1H, t,  $J = 8.0$  Hz), 5.39 (1H, s, Ar-OH), 4.81-4.73 (3H, m), 4.67-4.62 (1H, m), 3.98 (1H, quintet,  $J = 6.8$  Hz), 2.53-2.49 (2H, m), 1.75 (3H, s, CH<sub>3</sub>); <sup>13</sup>C NMR (CDCl<sub>3</sub>, DEPT-135)  $\delta$  153.5 (C), 142.1 (C), 129.1 (CH), 128.5 (CH), 125.5 (C), 121.1 (CH), 116.0 (CH), 113.5 (CH<sub>2</sub>, C=CH<sub>2</sub>), 78.6 (CH<sub>2</sub>), 39.9 (CH<sub>2</sub>), 37.6 (CH), 22.0 (CH<sub>3</sub>); LRMS  $m/z$  222.00 (M + H<sup>+</sup>), calcd for C<sub>12</sub>H<sub>15</sub>NO<sub>3</sub> 221.1052; HRMS  $m/z$  244.0945 (M + Na), calcd for C<sub>12</sub>H<sub>15</sub>NO<sub>3</sub>Na 244.0950; Anal. calcd for C<sub>12</sub>H<sub>15</sub>NO<sub>3</sub> (221.1052): C, 65.14; H, 6.83; N, 6.33. Found: C, 65.25; H, 6.87; N, 6.42%.

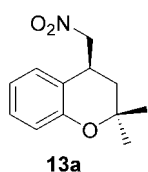

**(4S)-2,2-Dimethyl-4-nitromethyl-chroman (13a):** Prepared following the procedure G and purified by column chromatography using EtOAc/hexane and isolated as liquid. The enantiomeric excess (ee) was determined by chiral stationary phase HPLC using a Daicel Chiralcel OD-H column (hexane/2-propanol = 90:10, flow rate 1.0 mL/min,  $\lambda = 254$  nm),  $t_R = 6.44$  min (major),  $t_R = 8.15$  min (minor).  $[\alpha]_D^{25} = -65.8^\circ$  ( $c = 0.57$  g/100 mL, CHCl<sub>3</sub>, 81% ee); IR (Neat):  $\nu_{\max}$  2963, 2930, 2865, 1730, 1552 (NO<sub>2</sub>), 1483, 1444, 1376, 1260, 1087, 1025, 800 and 651 cm<sup>-1</sup>; <sup>1</sup>H NMR (CDCl<sub>3</sub>)  $\delta$  7.17 (1H, t,  $J = 7.6$  Hz), 7.08 (1H, d,  $J = 7.6$  Hz), 6.89 (1H, t,  $J = 7.2$  Hz), 6.84 (1H, d,  $J = 8.4$  Hz), 4.95 (1H, dd,  $J = 12.0, 4.8$  Hz), 4.40 (1H, t,  $J = 10.0$  Hz), 3.78-3.73 (1H, m), 1.98 (1H, dd,  $J = 13.4, 6.4$  Hz), 1.74 (1H, t,  $J = 11.6$  Hz), 1.44 (3H, s, CH<sub>3</sub>), 1.27 (3H, s, CH<sub>3</sub>); <sup>13</sup>C NMR (CDCl<sub>3</sub>, DEPT-135)  $\delta$  153.8 (C), 128.8 (CH), 126.3 (CH), 120.4 (CH), 118.7 (C), 118.4 (CH), 80.1 (CH<sub>2</sub>), 73.9 (C), 37.5 (CH<sub>2</sub>), 31.2 (CH), 29.5 (CH<sub>3</sub>), 24.1 (CH<sub>3</sub>); LRMS  $m/z$  221.80 (M + H<sup>+</sup>), calcd for C<sub>12</sub>H<sub>15</sub>NO<sub>3</sub> 221.1052; HRMS  $m/z$  244.0942 (M + Na), calcd for C<sub>12</sub>H<sub>15</sub>NO<sub>3</sub>Na 244.0950; Anal. calcd for C<sub>12</sub>H<sub>15</sub>NO<sub>3</sub> (221.1052): C, 65.14; H, 6.83; N, 6.33. Found: C, 65.08; H, 6.77; N, 6.25%.

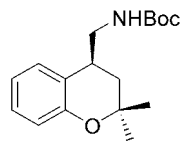**14a****(4S)-(2,2-Dimethyl-chroman-4-ylmethyl)-carbamic acid tert-butyl ester (14a):**

Prepared following the procedure **H** and purified by column chromatography using EtOAc/hexane and isolated as solid. Mp 68 °C;  $[\alpha]_D^{25} = -24.7^\circ$  ( $c = 0.5$  g/100 mL,  $\text{CHCl}_3$ , **81% ee**); IR (Neat):  $\nu_{\text{max}}$  3350 (NH), 2982, 2924, 2492, 1678 (C=O), 1606, 1577, 1525 (NO<sub>2</sub>), 1487, 1423, 1365, 1251, 1157, 1041, 935, 754, 638 and 403  $\text{cm}^{-1}$ ; <sup>1</sup>H NMR (CDCl<sub>3</sub>)  $\delta$  7.25 (1H, br d,  $J = 7.2$  Hz), 7.12 (1H, t,  $J = 7.2$  Hz), 6.88 (1H, t,  $J = 7.2$  Hz), 6.81 (1H, dd,  $J = 7.2, 1.0$  Hz), 4.50 (1H, s, NH), 3.82-3.77 (1H, m), 3.40-3.36 (1H, m), 3.09 (1H, m), 1.88 (1H, dd,  $J = 13.6, 6.0$  Hz), 1.68 (1H, t,  $J = 12.8$  Hz), 1.43 (12H, s, 4 x CH<sub>3</sub>), 1.23 (3H, s, CH<sub>3</sub>); <sup>13</sup>C NMR (CDCl<sub>3</sub>, DEPT-135)  $\delta$  156.1 (C), 154.4 (C), 127.9 (CH), 126.7 (CH), 121.6 (C), 120.2 (CH), 117.8 (CH), 79.4 (C), 74.2 (C), 43.6 (CH<sub>2</sub>), 37.3 (CH<sub>2</sub>), 31.9 (CH), 30.0 (CH<sub>3</sub>), 28.3 (3 x CH<sub>3</sub>), 24.1 (CH<sub>3</sub>); LRMS  $m/z$  292.10 (M + H<sup>+</sup>), calcd for C<sub>17</sub>H<sub>25</sub>NO<sub>3</sub> 291.1834; Anal. calcd for C<sub>17</sub>H<sub>25</sub>NO<sub>3</sub> (291.1834): C, 70.07; H, 8.65; N, 4.81. Found: C, 70.15; H, 8.61; N, 4.85%.

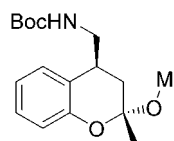**15aa****(2R, 4S)-(2-Methoxy-2-methyl-chroman-4-ylmethyl)-carbamic acid tert-butyl ester**

**(15aa):** Prepared following the procedure **H** and purified by column chromatography using EtOAc/hexane and isolated as liquid. The enantiomeric excess (ee) was determined by chiral stationary phase HPLC using a Daicel Chiralcel OD-H column

(hexane/2-propanol = 94:6, flow rate 0.6 mL/min,  $\lambda = 254$  nm),  $t_R = 9.83$  min (major),  $t_R = 11.39$  min (minor).  $[\alpha]_D^{25} = -44.5^\circ$  ( $c = 0.22$  g/100 mL,  $\text{CHCl}_3$ , **81% ee**); IR (Neat):  $\nu_{\text{max}}$  3627 (NH), 3361, 2977, 2936, 1704 (C=O), 1491, 1454, 1370, 1256, 1168, 1107, 1067 and 733  $\text{cm}^{-1}$ ; <sup>1</sup>H NMR (CDCl<sub>3</sub>)  $\delta$  7.25 (1H, d,  $J = 8.0$  Hz), 7.15 (1H, t,  $J = 8.0$  Hz), 6.94 (1H, dt,  $J = 8.0, 0.8$  Hz), 6.86 (1H, dd,  $J = 8.2, 1.2$  Hz), 4.44 (1H, s, NH), 3.80-3.73 (1H, m), 3.51-3.45 (1H, m), 3.29-3.22 (1H, m), 3.24 (3H, s, OCH<sub>3</sub>), 2.13 (1H, dd,  $J = 13.4, 6.0$  Hz), 1.75 (1H, t,  $J = 13.2$  Hz), 1.56 (3H, s, CH<sub>3</sub>), 1.47-1.41 (9H, m); <sup>13</sup>C NMR (CDCl<sub>3</sub>, DEPT-135)  $\delta$  156.1 (C), 152.8 (C), 127.8 (CH), 126.2 (CH), 123.0 (C), 121.1 (CH), 117.4 (CH), 98.4 (C), 79.3 (C), 49.0 (CH<sub>3</sub>, OCH<sub>3</sub>), 42.4 (CH<sub>2</sub>), 36.2 (CH<sub>2</sub>), 31.0 (CH), 28.3 (3 x CH<sub>3</sub>), 23.1 (CH<sub>3</sub>); HRMS  $m/z$  330.1682 (M + Na), calcd for C<sub>17</sub>H<sub>25</sub>NO<sub>4</sub>Na 330.1681; Anal. calcd for C<sub>17</sub>H<sub>25</sub>NO<sub>4</sub> (307.1784): C, 66.43; H, 8.20; N, 4.56. Found: C, 66.56; H, 8.25; N, 4.51%.

**(4S, 2S)-4-(2-Methoxy-phenyl)-2-methyl-pyrrolidine (cis-16ab) and (4S, 2R)-4-(2-Methoxy-phenyl)-**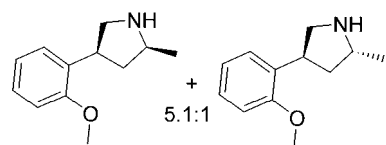**16ab****2-methyl-pyrrolidine (trans-16ab):**

Prepared following the procedure **K** and purified by column chromatography using EtOAc/hexane and isolated as liquid.  $[\alpha]_D^{25} = +31.0^\circ$  ( $c = 0.35$  g/100 mL,  $\text{CHCl}_3$ , **80% ee**); IR (Neat):  $\nu_{\text{max}}$  1598, 1493, 1459, 1243, 1095, 1026, 799, 641 and 605  $\text{cm}^{-1}$ ; <sup>1</sup>H NMR (CDCl<sub>3</sub>, major *cis*-isomer)  $\delta$  7.22-7.09 (2H, m),

This journal is (c) The Royal Society of Chemistry 2010

6.93-6.84 (2H, m), 3.82 (3H, s, OCH<sub>3</sub>), 3.88-3.70 (1H, m), 3.64-3.56 (1H, m), 3.34-3.25 (1H, m), 2.99-2.95 (1H, m), 2.64-2.57 (1H, br s, NH), 2.32-2.23 (1H, m), 1.54-1.43 (1H, m), 1.27 (3H, d, *J* = 6.2 Hz); <sup>13</sup>C NMR (CDCl<sub>3</sub>, DEPT-135, major *cis*-isomer) δ 157.3 (C), 132.4 (C), 127.2 (CH), 127.1 (CH), 120.5 (CH), 110.4 (CH), 55.5 (CH), 55.3 (CH<sub>3</sub>, OCH<sub>3</sub>), 53.0 (CH<sub>2</sub>), 41.5 (CH<sub>2</sub>), 40.6 (CH), 21.0 (CH<sub>3</sub>); LRMS *m/z* 192.15 (M + H<sup>+</sup>), calcd for C<sub>12</sub>H<sub>17</sub>NO 191.1310; Anal. calcd for C<sub>12</sub>H<sub>17</sub>NO (191.1310): C, 75.35; H, 8.96; N, 7.32. Found: C, 75.48; H, 8.88; N, 7.42%.

**(4*S*, 2*S*)-4-(2-Methoxy-phenyl)-2-methyl-1-(toluene-4-sulfonyl)-pyrrolidine (*cis*-17ab) and (4*S*, 2*R*)-4-(2-Methoxy-phenyl)-2-methyl-1-(toluene-4-sulfonyl)-pyrrolidine (*trans*-17ab):** Prepared following the procedure **L** and purified by column chromatography using EtOAc/hexane and isolated as liquid.

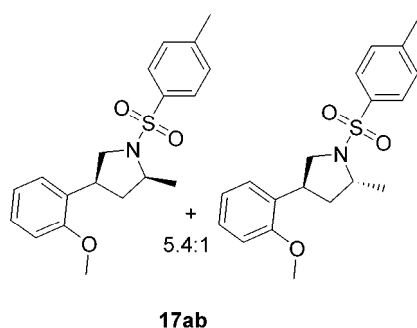

$[\alpha]_D^{25} = +38.5^\circ$  (*c* = 0.33 g/100 mL, CHCl<sub>3</sub>, 80% *ee*); IR (Neat):

$\nu_{\max}$  1597, 1493, 1461, 1341, 1243, 1092, 1032, 817, 755, 724, 658, 642 and 625 cm<sup>-1</sup>; <sup>1</sup>H NMR (CDCl<sub>3</sub>, major *cis*-isomer) δ 7.82 (2H, d, *J* = 8.2 Hz), 7.36 (2H, d, *J* = 8.0 Hz), 7.24-7.19 (1H, m), 7.12-7.10 (1H, m), 6.93-6.89 (1H, m), 6.85-6.82 (1H, m), 3.96 (1H, ddd, *J* = 11.6, 7.4, 1.2 Hz), 3.79 (3H, s, Ar-OCH<sub>3</sub>), 3.76-3.71 (1H, m), 3.27 (1H, t, *J* = 11.2 Hz), 2.97-2.87 (1H, m), 2.47 (3H, s, Ar-CH<sub>3</sub>),

2.96-2.23 (1H, m), 1.82-1.74 (1H, m), 1.49 (3H, d, *J* = 6.2 Hz); <sup>1</sup>H NMR (CDCl<sub>3</sub>, minor *trans*-isomer) δ 7.74 (2H, d, *J* = 8.2 Hz), 7.31 (2H, d, *J* = 8.0 Hz), 7.24-7.19 (1H, m), 7.12-7.10 (1H, m), 6.93-6.89 (1H, m), 6.85-6.82 (1H, m), 3.99-3.92 (1H, m), 3.79 (3H, s), 3.76-3.71 (1H, m), 3.27 (1H, t, *J* = 11.0 Hz), 2.97-2.87 (1H, m), 2.45 (3H, s), 2.96-2.23 (1H, m), 2.00-1.85 (1H, m), 1.44 (3H, d, *J* = 6.4 Hz); <sup>13</sup>C NMR (CDCl<sub>3</sub>, DEPT-135, major *cis*-isomer) δ 157.5 (C), 143.1 (C), 135.4 (C), 129.5 (2 x CH), 127.9 (CH), 127.7 (C), 127.6 (2 x CH), 126.6 (CH), 120.5 (CH), 110.3 (CH), 56.7 (CH), 55.2 (CH<sub>3</sub>, OCH<sub>3</sub>), 53.9 (CH<sub>2</sub>), 39.9 (CH<sub>2</sub>), 37.3 (CH), 22.8 (CH<sub>3</sub>), 21.5 (CH<sub>3</sub>); <sup>13</sup>C NMR (CDCl<sub>3</sub>, DEPT-135, minor *trans*-isomer) δ 157.6 (C), 143.1 (C), 134.6 (C), 129.5 (2 x CH), 127.9 (CH), 127.6 (2 x CH), 127.5 (C), 126.6 (CH), 120.4 (CH), 110.36 (CH), 56.7 (CH), 55.7 (CH<sub>3</sub>, OCH<sub>3</sub>), 53.8 (CH<sub>2</sub>), 37.9 (CH<sub>2</sub>), 36.1 (CH), 23.4 (CH<sub>3</sub>), 21.5 (CH<sub>3</sub>); LRMS *m/z* 346.25 (M + H<sup>+</sup>), calcd for C<sub>19</sub>H<sub>23</sub>NO<sub>3</sub>S 345.1399; Anal. calcd for C<sub>19</sub>H<sub>23</sub>NO<sub>3</sub>S (345.1399): C, 66.06; H, 6.71; N, 4.05. Found: C, 66.25; H, 6.62; N, 4.12%.

♣ The absolute configuration of chiral products **8aa-eb** and **9aa-eb** were also established by comparison of **(+)-11ab** with the chiral product synthesized from direct asymmetric Michael reaction (see Fei Xue et al. *Adv. Synth. Catal.*, **2008**, 350, 2194-2198).

RACEMIC **5a** ↔ **4a** ↔ **6a**: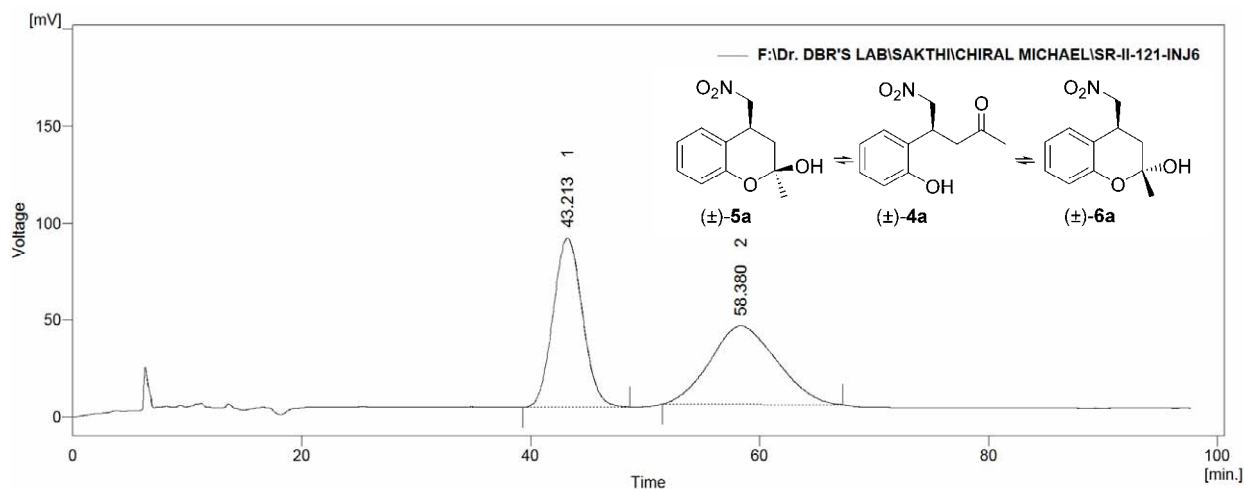

Daicel chiralpak AD-H, Hexane/i-PrOH = 95:5, Flow Rate 0.5 mL/min, 254 nm.

Result Table (Uncal - F:\Dr. DBR'S LAB\SAKTHI\CHIRAL MICHAEL\SR-II-121-INJ6)

|   | Reten. Time [min] | Area [mV.s] | Height [mV] | Area [%] | Height [%] | W05 [min] |
|---|-------------------|-------------|-------------|----------|------------|-----------|
| 1 | 43.213            | 10318.546   | 58.262      | 48.7     | 68.4       | 2.77      |
| 2 | 58.380            | 10879.922   | 26.908      | 51.3     | 31.6       | 6.38      |
|   | Total             | 21198.468   | 85.170      | 100.0    | 100.0      |           |

CHIRAL **5a** ↔ **4a** ↔ **6a** (22% ee):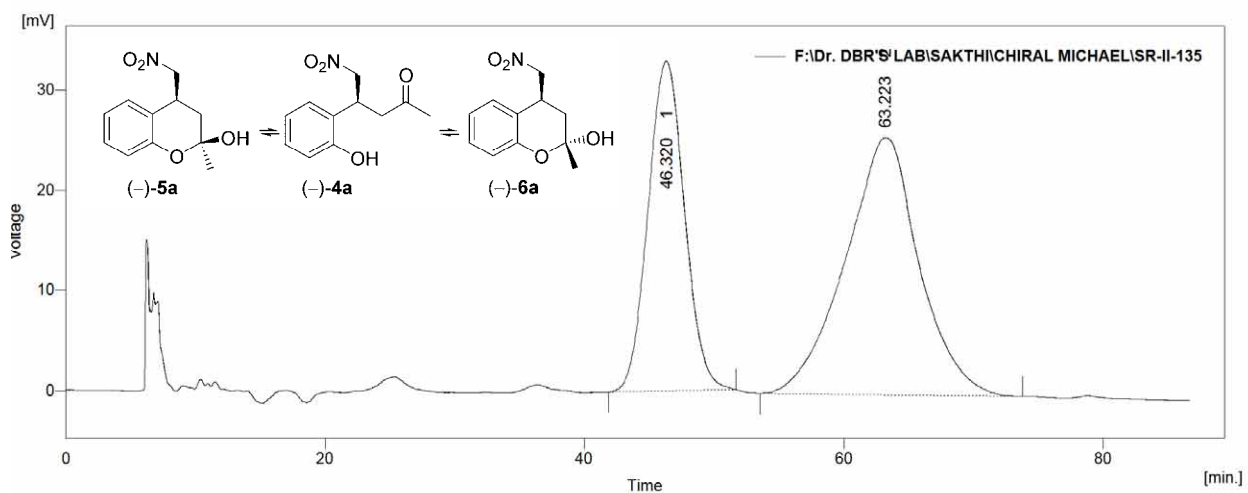

Daicel chiralpak AD-H, Hexane/i-PrOH = 95:5, Flow Rate 0.5 mL/min, 254 nm.

Result Table (Uncal - F:\Dr. DBR'S LAB\SAKTHI\CHIRAL MICHAEL\SR-II-135)

|   | Reten. Time | Area | Height | Area | Height | W05 |
|---|-------------|------|--------|------|--------|-----|
| 1 | 46.320      |      |        |      |        |     |
| 2 | 63.223      |      |        |      |        |     |



RACEMIC **8aa**: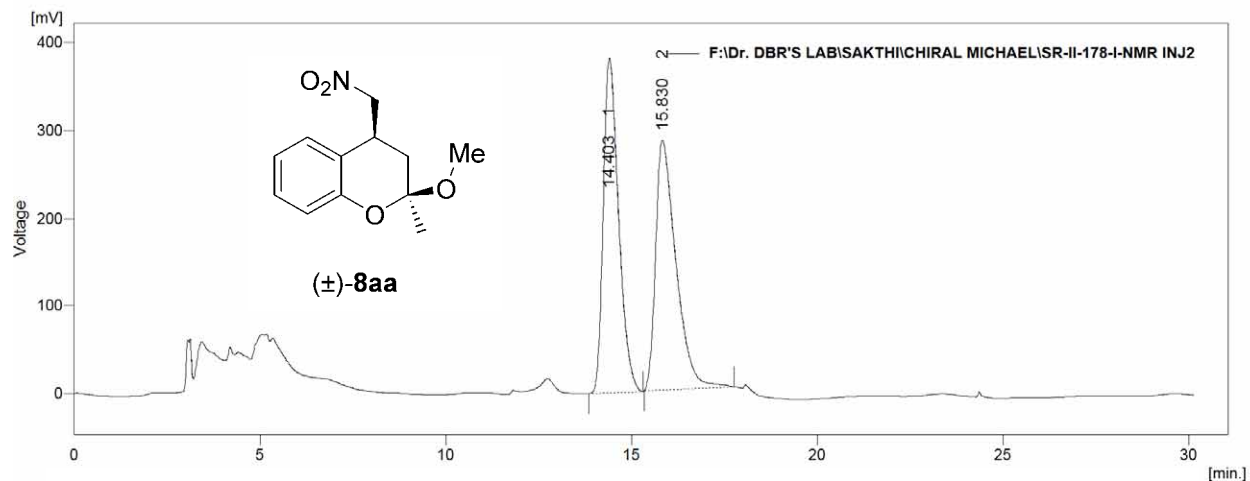

Result Table (Uncal - F:\Dr. DBR'S LAB\SAKTHI\CHIRAL MICHAEL\SR-II-178-I-NMR INJ2)

|   | Reten. Time [min] | Area [mV.s] | Height [mV] | Area [%] | Height [%] | W05 [min] |
|---|-------------------|-------------|-------------|----------|------------|-----------|
| 1 | 14.403            | 7267.009    | 254.500     | 50.2     | 57.3       | 0.44      |
| 2 | 15.830            | 7207.534    | 190.025     | 49.8     | 42.7       | 0.57      |
|   | Total             | 14474.543   | 444.525     | 100.0    | 100.0      |           |

CHIRAL **8aa** (84% ee):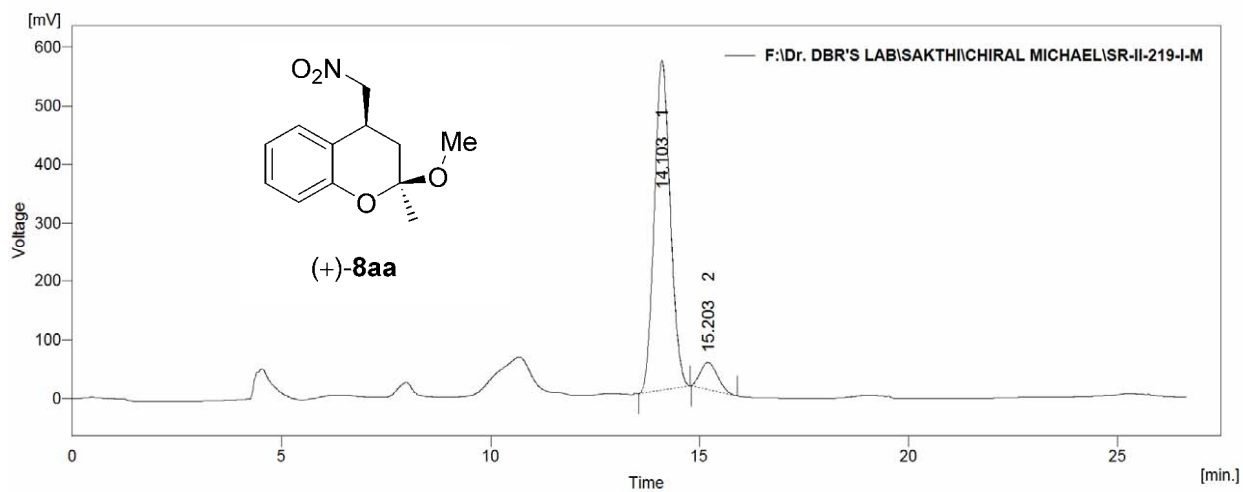

Result Table (Uncal - F:\Dr. DBR'S LAB\SAKTHI\CHIRAL MICHAEL\SR-II-219-I-M)

|   | Reten. Time [min] | Area [mV.s] | Height [mV] | Area [%] | Height [%] | W05 [min] |
|---|-------------------|-------------|-------------|----------|------------|-----------|
| 1 | 14.103            | 9914.923    | 375.320     | 91.9     | 92.4       | 0.41      |
| 2 | 15.203            | 879.379     | 30.667      | 8.1      | 7.6        | 0.46      |
|   | Total             | 10794.302   | 405.987     | 100.0    | 100.0      |           |

RACEMIC **9aa**: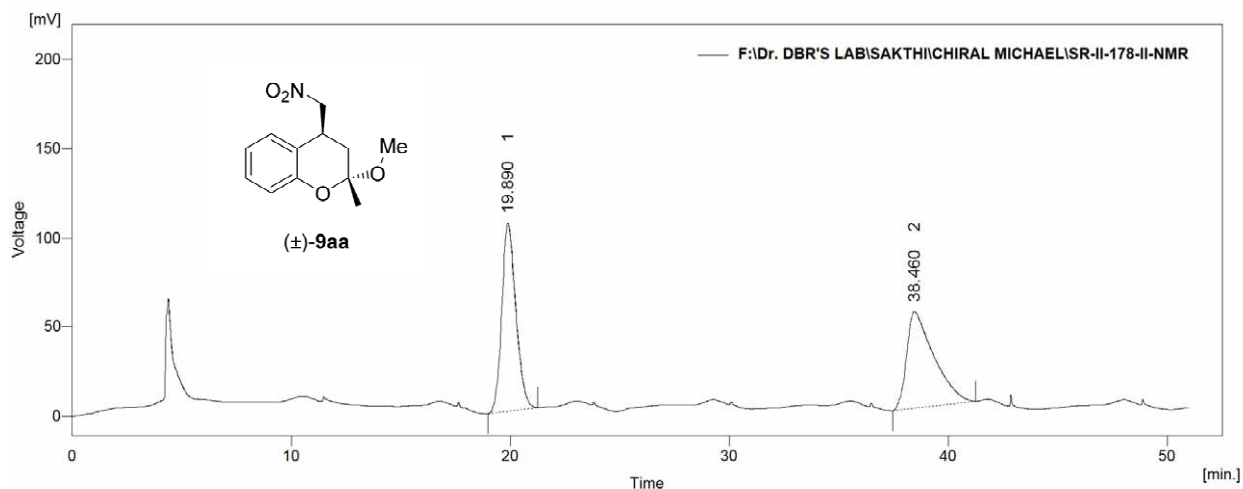

Daicel chiralcel OD-H, Hexane/i-PrOH = 99:1, Flow Rate 0.8 mL/min, 254 nm.

Result Table (Uncal - F:\Dr. DBR'S LAB\SAKTHI\CHIRAL MICHAEL\SR-II-178-II-NMR)

|   | Reten. Time [min] | Area [mV.s] | Height [mV] | Area [%] | Height [%] | W05 [min] |
|---|-------------------|-------------|-------------|----------|------------|-----------|
| 1 | 19.890            | 3121.366    | 70.465      | 50.3     | 66.2       | 0.68      |
| 2 | 38.460            | 3086.682    | 35.926      | 49.7     | 33.8       | 1.35      |
|   | Total             | 6208.048    | 106.391     | 100.0    | 100.0      |           |

CHIRAL **9aa** (82% ee):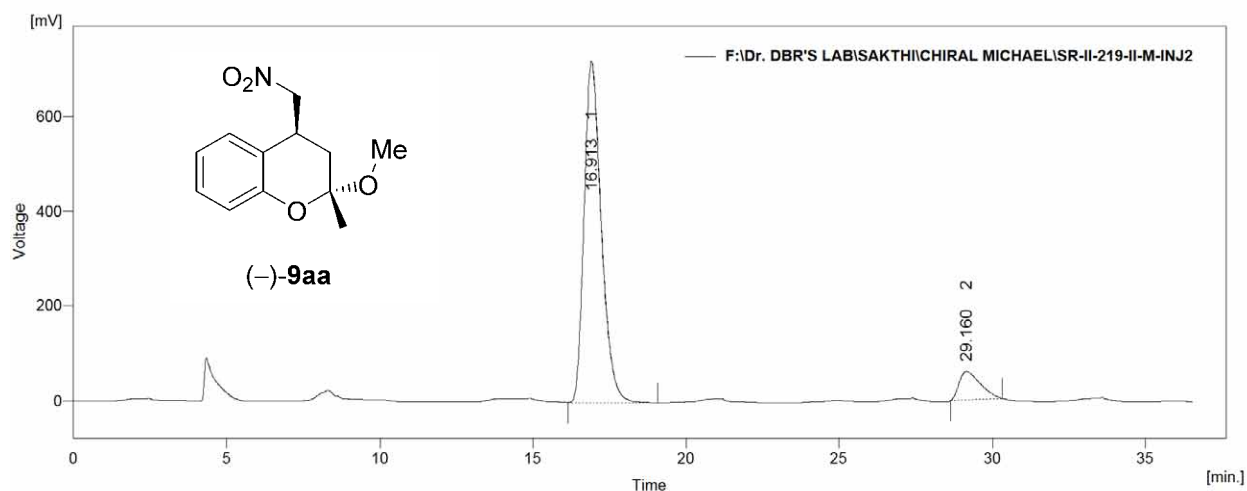

Daicel chiralcel OD-H, Hexane/i-PrOH = 99:1, Flow Rate 0.8 mL/min, 254 nm.

Result Table (Uncal - F:\Dr. DBR'S LAB\SAKTHI\CHIRAL MICHAEL\SR-II-219-II-M-INJ2)

|   | Reten. Time [min] | Area [mV.s] | Height [mV] | Area [%] | Height [%] | W05 [min] |
|---|-------------------|-------------|-------------|----------|------------|-----------|
| 1 | 16.913            | 18743.042   | 480.605     | 90.8     | 92.4       | 0.60      |
| 2 | 29.160            | 1894.363    | 39.584      | 9.2      | 7.6        | 0.78      |
|   | Total             | 20637.404   | 520.188     | 100.0    | 100.0      |           |

RACEMIC **5b**: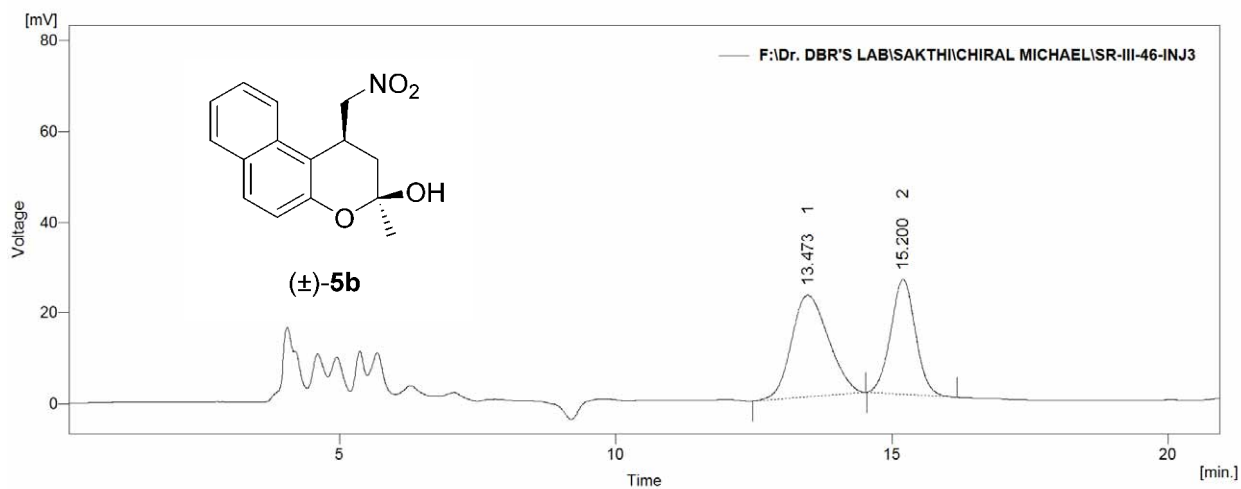

Daicel chiralcel OD-H, Hexane/i-PrOH = 90:10, Flow Rate 1.0 mL/min, 254 nm.

Result Table (Uncal - F:\Dr. DBR'S LAB\SAKTHI\CHIRAL MICHAEL\SR-III-46-INJ3)

|   | Reten. Time [min] | Area [mV.s] | Height [mV] | Area [%] | Height [%] | W05 [min] |
|---|-------------------|-------------|-------------|----------|------------|-----------|
| 1 | 13.473            | 692.512     | 14.928      | 56.7     | 46.9       | 0.74      |
| 2 | 15.200            | 527.822     | 16.918      | 43.3     | 53.1       | 0.48      |
|   | Total             | 1220.334    | 31.847      | 100.0    | 100.0      |           |

CHIRAL **5b** (98% ee):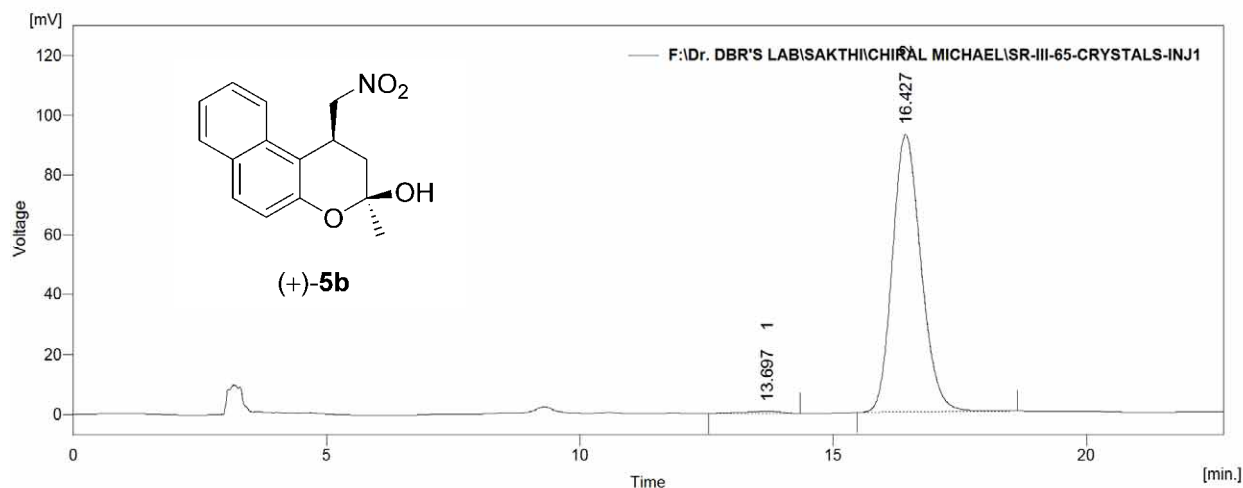

Daicel chiralcel OD-H, Hexane/i-PrOH = 90:10, Flow Rate 1.0 mL/min, 254 nm.

Result Table (Uncal - F:\Dr. DBR'S LAB\SAKTHI\CHIRAL MICHAEL\SR-III-65-CRYSTALS-INJ1)

|   | Reten. Time [min] | Area [mV.s] | Height [mV] | Area [%] | Height [%] | W05 [min] |
|---|-------------------|-------------|-------------|----------|------------|-----------|
| 1 | 13.697            | 24.119      | 0.454       | 1.0      | 0.7        | 0.88      |
| 2 | 16.427            | 2425.580    | 61.868      | 99.0     | 99.3       | 0.60      |
|   | Total             | 2449.699    | 62.322      | 100.0    | 100.0      |           |



RACEMIC **8ca**: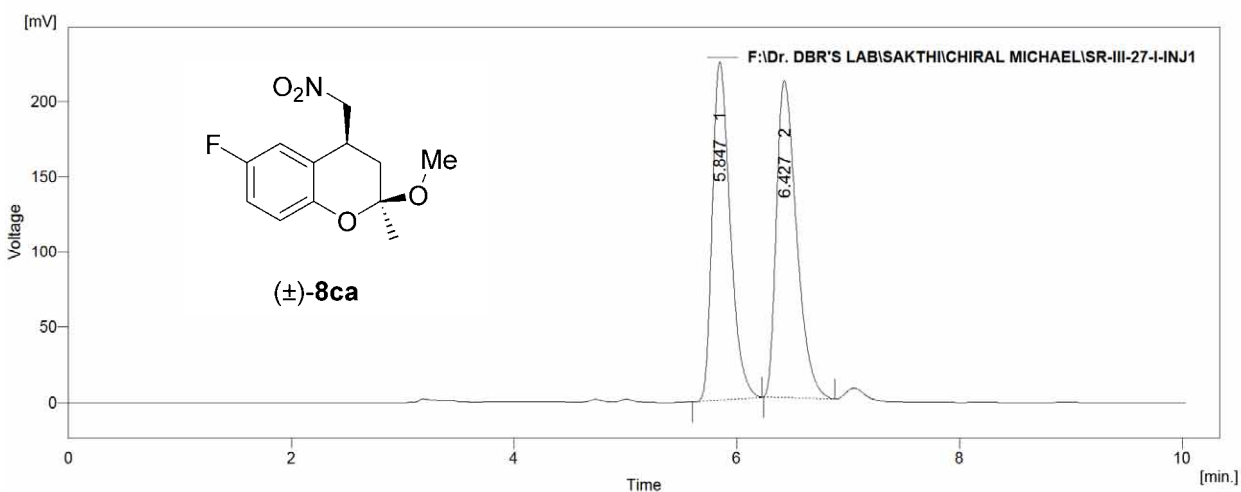

Daicel chiralpak AS-H, Hexane/*i*-PrOH = 95:5, Flow Rate 1.0 mL/min, 254 nm.

Result Table (Uncal - F:\Dr. DBR'S LAB\SAKTHI\CHIRAL MICHAEL\SR-III-27-I-INJ1)

|   | Reten. Time [min] | Area [mV.s] | Height [mV] | Area [%] | Height [%] | W05 [min] |
|---|-------------------|-------------|-------------|----------|------------|-----------|
| 1 | 5.847             | 1660.629    | 149.464     | 48.5     | 51.6       | 0.18      |
| 2 | 6.427             | 1765.566    | 140.133     | 51.5     | 48.4       | 0.20      |
|   | Total             | 3426.195    | 289.597     | 100.0    | 100.0      |           |

CHIRAL **8ca** (82% ee):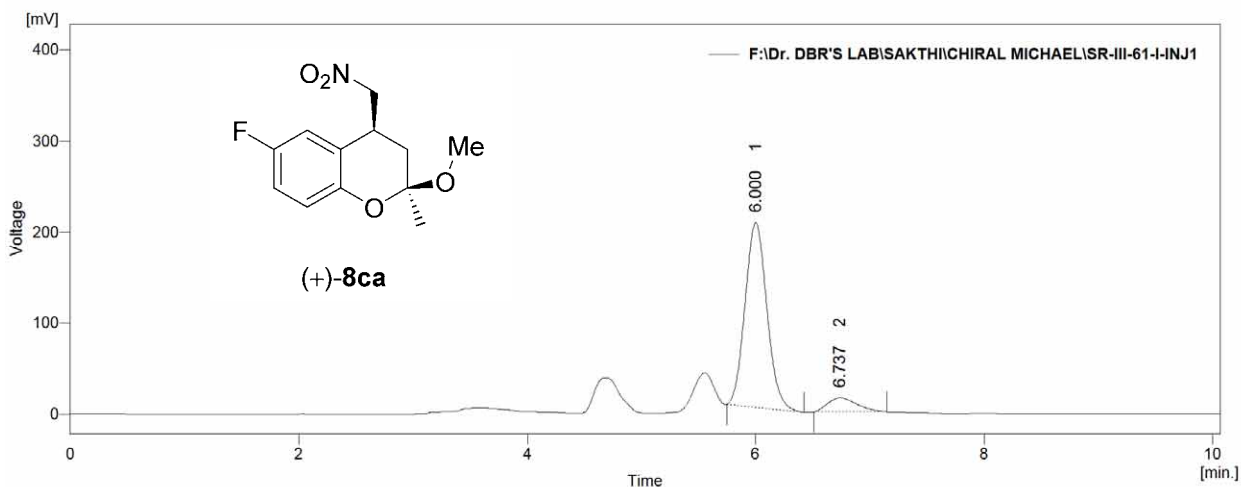

Daicel chiralpak AS-H, Hexane/*i*-PrOH = 95:5, Flow Rate 1.0 mL/min, 254 nm.

Result Table (Uncal - F:\Dr. DBR'S LAB\SAKTHI\CHIRAL MICHAEL\SR-III-61-I-INJ1)

|   | Reten. Time [min] | Area [mV.s] | Height [mV] | Area [%] | Height [%] | W05 [min] |
|---|-------------------|-------------|-------------|----------|------------|-----------|
| 1 | 6.000             | 1797.229    | 135.714     | 91.0     | 93.0       | 0.21      |
| 2 | 6.737             | 178.300     | 10.179      | 9.0      | 7.0        | 0.28      |
|   | Total             | 1975.529    | 145.893     | 100.0    | 100.0      |           |

RACEMIC **9ca**: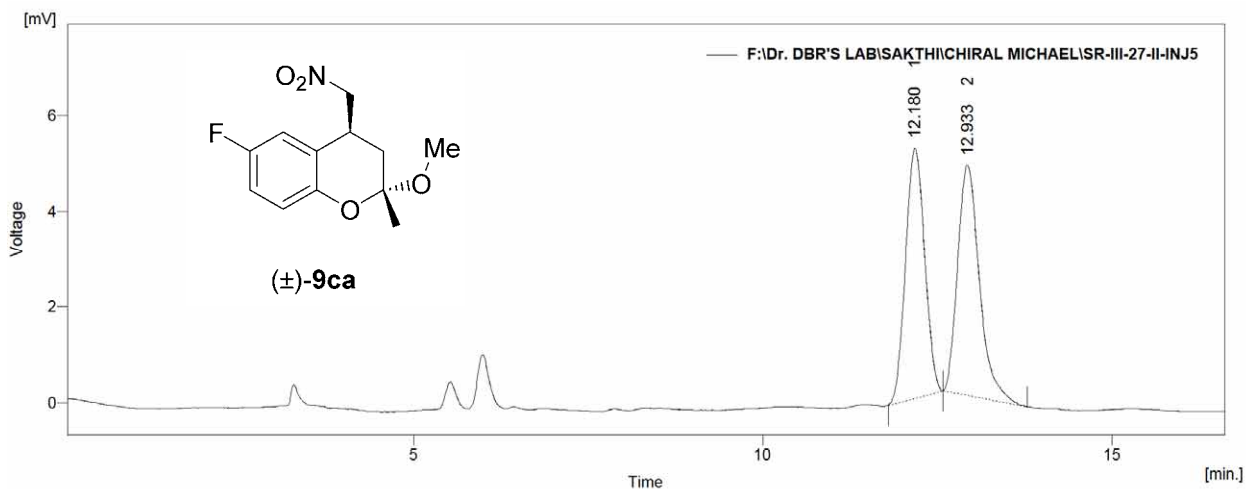

Daicel chiralcel OD-H, Hexane/*i*-PrOH = 97:3, Flow Rate 1.0 mL/min, 254 nm.

Result Table (Uncal - F:\Dr. DBR'S LAB\SAKTHI\CHIRAL MICHAEL\SR-III-27-II-INJ5)

|   | Reten. Time [min] | Area [mV.s] | Height [mV] | Area [%] | Height [%] | W05 [min] |
|---|-------------------|-------------|-------------|----------|------------|-----------|
| 1 | 12.180            | 66.175      | 3.490       | 48.7     | 52.1       | 0.31      |
| 2 | 12.933            | 69.599      | 3.210       | 51.3     | 47.9       | 0.33      |
|   | Total             | 135.775     | 6.700       | 100.0    | 100.0      |           |

CHIRAL **9ca** (76% ee):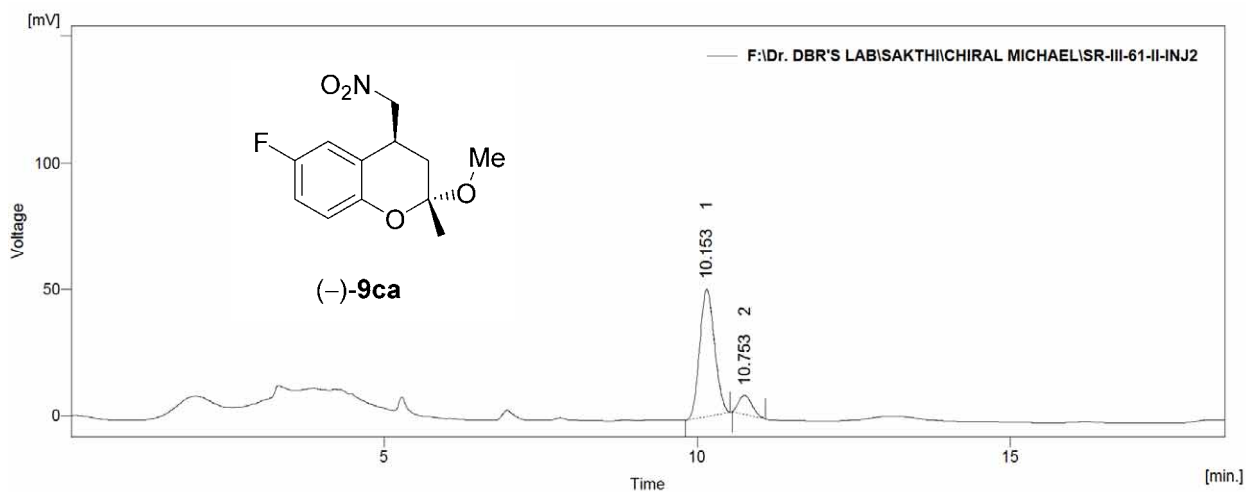

Daicel chiralcel OD-H, Hexane/*i*-PrOH = 97:3, Flow Rate 1.0 mL/min, 254 nm.

Result Table (Uncal - F:\Dr. DBR'S LAB\SAKTHI\CHIRAL MICHAEL\SR-III-61-II-INJ2)

|   | Reten. Time [min] | Area [mV.s] | Height [mV] | Area [%] | Height [%] | W05 [min] |
|---|-------------------|-------------|-------------|----------|------------|-----------|
| 1 | 10.153            | 549.336     | 33.409      | 88.0     | 87.0       | 0.26      |
| 2 | 10.753            | 74.868      | 4.991       | 12.0     | 13.0       | 0.24      |

RACEMIC **8da**: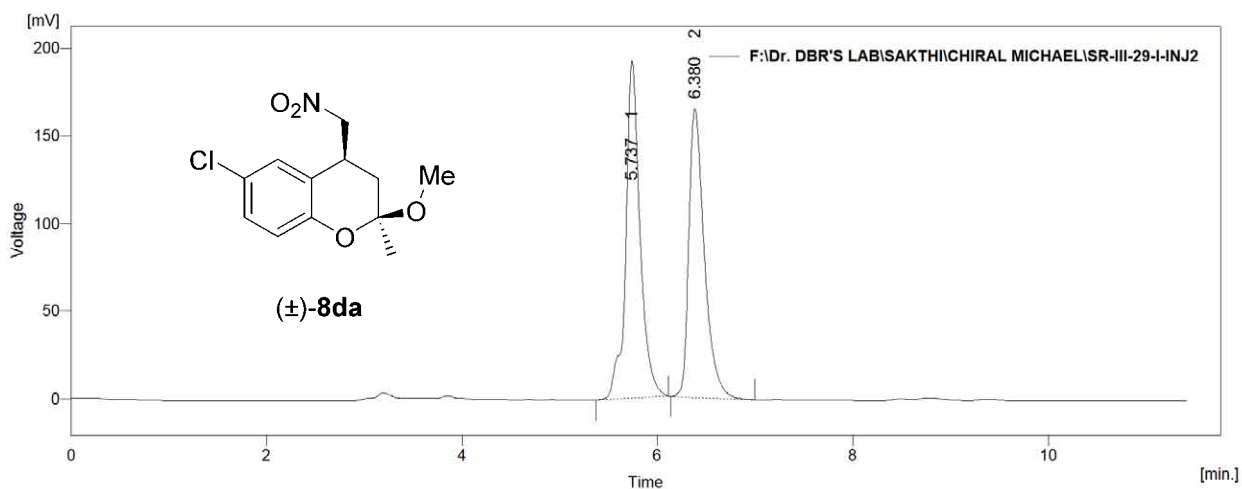

Daicel chiralpak AS-H, Hexane/*i*-PrOH = 95:5, Flow Rate 1.0 mL/min, 254 nm.

Result Table (Uncal - F:\Dr. DBR'S LAB\SAKTHI\CHIRAL MICHAEL\SR-III-29-I-INJ2)

|   | Reten. Time [min] | Area [mV.s] | Height [mV] | Area [%] | Height [%] | W05 [min] |
|---|-------------------|-------------|-------------|----------|------------|-----------|
| 1 | 5.737             | 1308.769    | 128.240     | 51.9     | 53.9       | 0.14      |
| 2 | 6.380             | 1212.254    | 109.864     | 48.1     | 46.1       | 0.17      |
|   | Total             | 2521.023    | 238.105     | 100.0    | 100.0      |           |

CHIRAL **8da** (69% ee):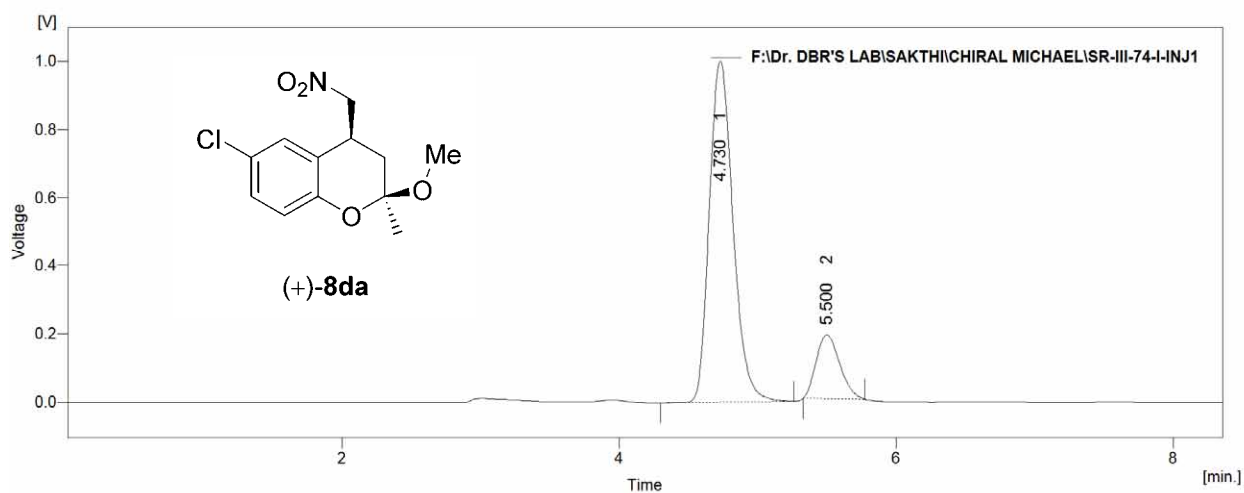

Daicel chiralpak AS-H, Hexane/*i*-PrOH = 95:5, Flow Rate 1.0 mL/min, 254 nm.

RACEMIC **9da**: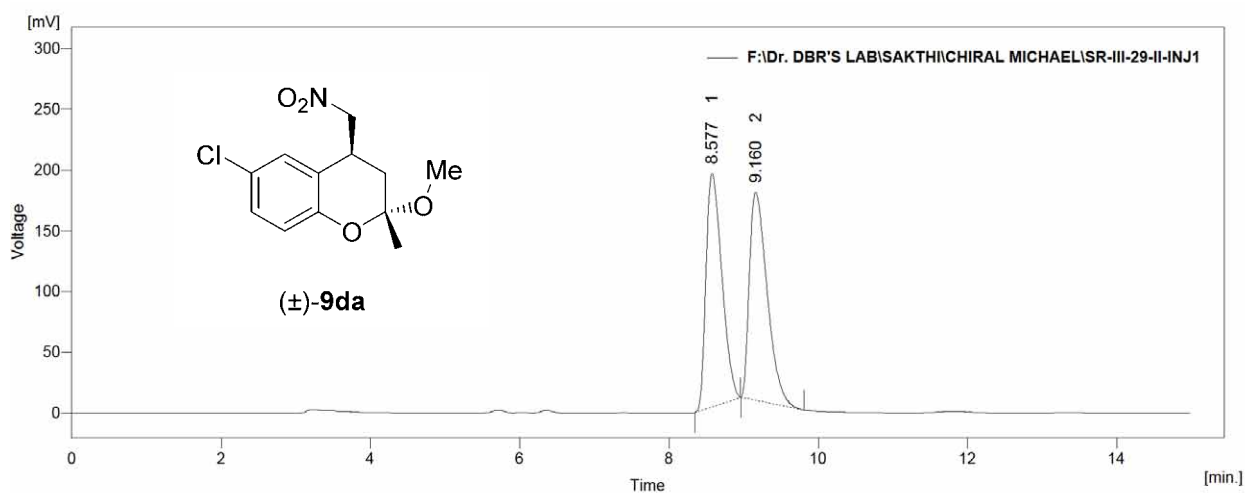Daicel chiralpak AS-H, Hexane/*i*-PrOH = 95:5, Flow Rate 1.0 mL/min, 254 nm.

Result Table (Uncal - F:\Dr. DBR'S LAB\SAKTHI\CHIRAL MICHAEL\SR-III-29-II-INJ1)

|   | Reten. Time [min] | Area [mV.s] | Height [mV] | Area [%] | Height [%] | W05 [min] |
|---|-------------------|-------------|-------------|----------|------------|-----------|
| 1 | 8.577             | 1882.576    | 127.911     | 49.9     | 52.9       | 0.24      |
| 2 | 9.160             | 1886.995    | 114.052     | 50.1     | 47.1       | 0.26      |
|   | Total             | 3769.571    | 241.963     | 100.0    | 100.0      |           |

CHIRAL **9da** (70% ee):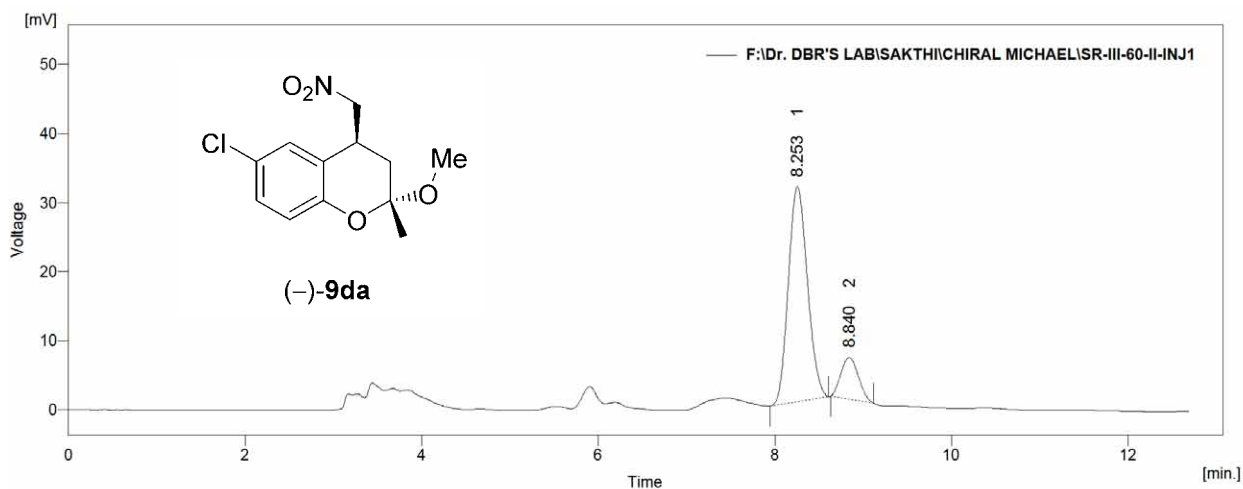Daicel chiralpak AS-H, Hexane/*i*-PrOH = 95:5, Flow Rate 1.0 mL/min, 254 nm.

RACEMIC **8ea**: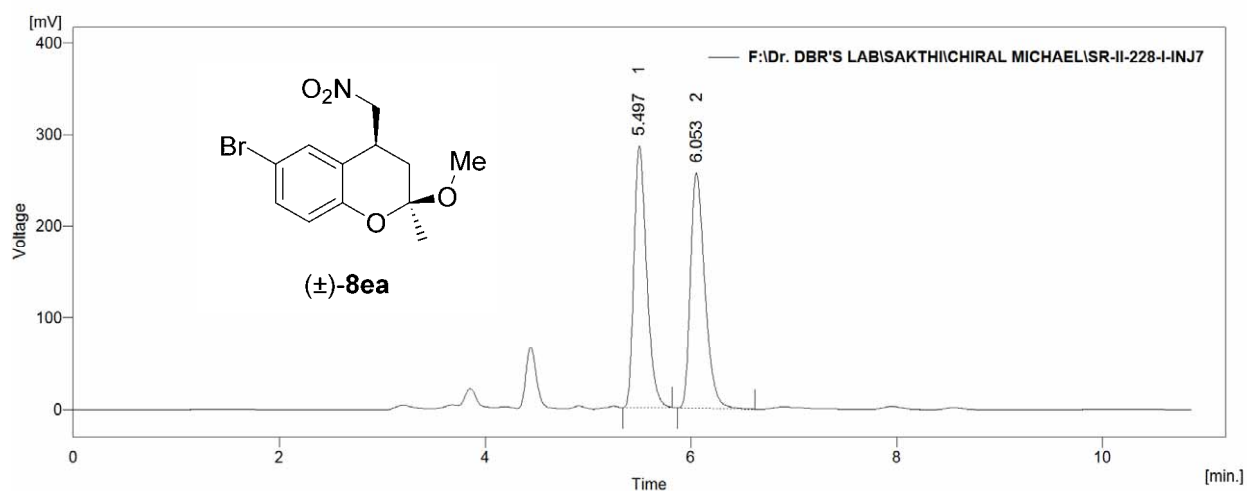

Daicel Chiralpak AS-H, Hexane/i-PrOH = 91:9, Flow Rate 1.0 mL/min, 254 nm.

Result Table (Uncal - F:\Dr. DBR'S LAB\SAKTHI\CHIRAL MICHAEL\SR-II-228-I-INJ7)

|   | Reten. Time [min] | Area [mV.s] | Height [mV] | Area [%] | Height [%] | W05 [min] |
|---|-------------------|-------------|-------------|----------|------------|-----------|
| 1 | 5.497             | 1624.272    | 190.149     | 49.5     | 52.7       | 0.13      |
| 2 | 6.053             | 1659.037    | 170.785     | 50.5     | 47.3       | 0.15      |
|   | Total             | 3283.309    | 360.934     | 100.0    | 100.0      |           |

CHIRAL **8ea** (87% ee):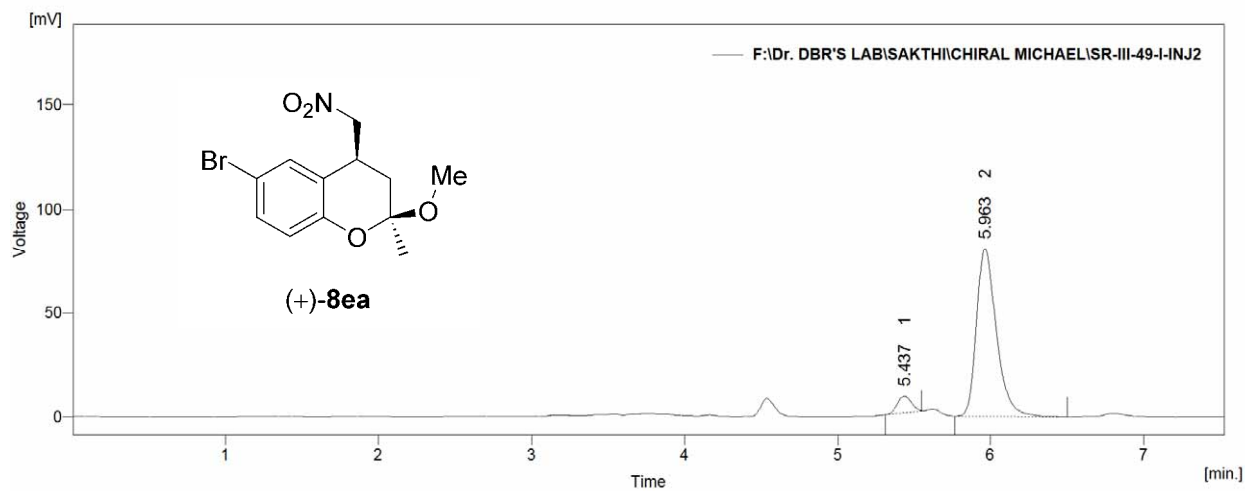

RACEMIC **9ea**: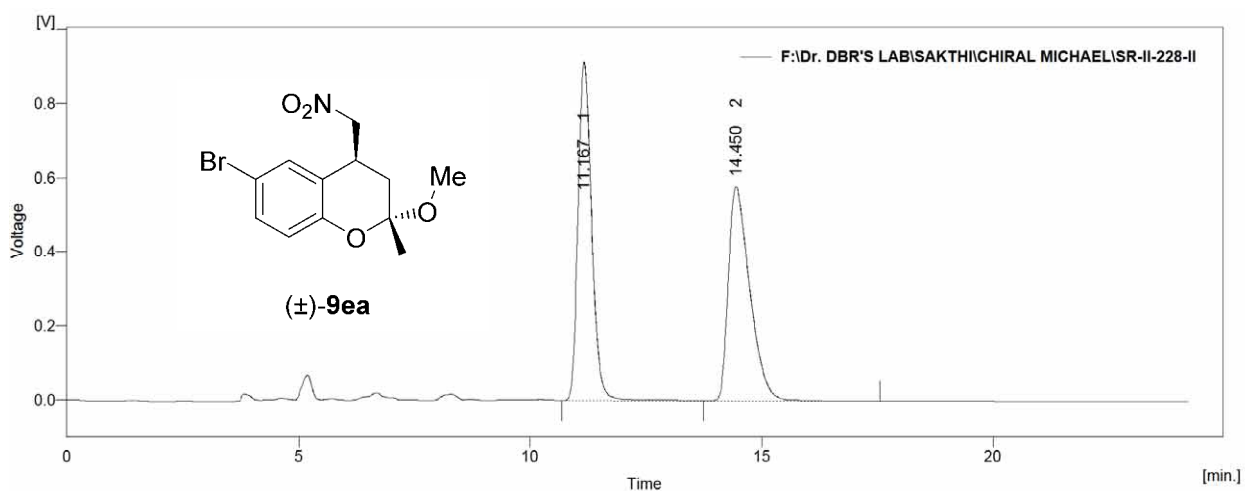

Daicel Chiralcel OD-H, Hexane/i-PrOH = 95:5, Flow Rate 0.8 mL/min, 254 nm.

Result Table (Uncal - F:\Dr. DBR'S LAB\SAKTHI\CHIRAL MICHAEL\SR-II-228-II)

|   | Reten. Time [min] | Area [mV.s] | Height [mV] | Area [%] | Height [%] | W05 [min] |
|---|-------------------|-------------|-------------|----------|------------|-----------|
| 1 | 11.167            | 12544.448   | 609.489     | 50.3     | 61.2       | 0.32      |
| 2 | 14.450            | 12408.256   | 385.931     | 49.7     | 38.8       | 0.50      |
|   | Total             | 24952.704   | 995.419     | 100.0    | 100.0      |           |

CHIRAL **9ea** (86% ee):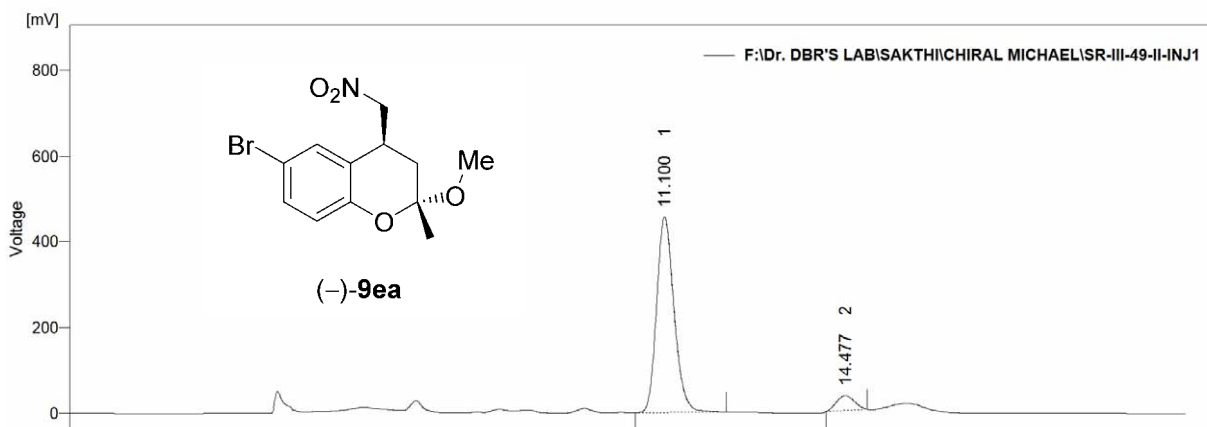

RACEMIC **8fa**: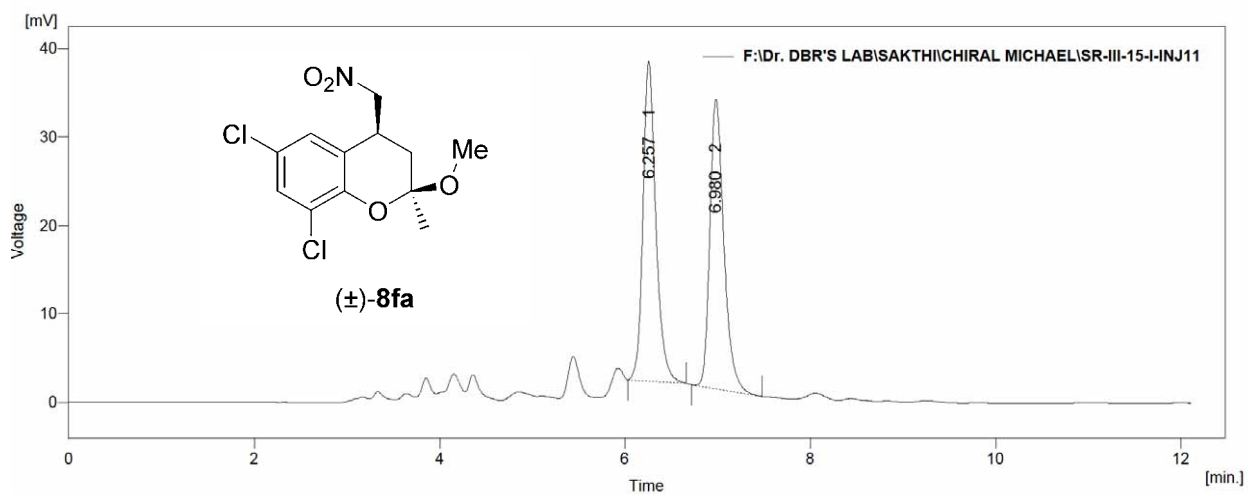

Daicel Chiralpak AS-H, Hexane/*i*-PrOH = 97:3, Flow Rate 1.0 mL/min, 254 nm.

Result Table (Uncal - F:\Dr. DBR'S LAB\SAKTHI\CHIRAL MICHAEL\SR-III-15-I-INJ11)

|   | Reten. Time [min] | Area [mV.s] | Height [mV] | Area [%] | Height [%] | W05 [min] |
|---|-------------------|-------------|-------------|----------|------------|-----------|
| 1 | 6.257             | 231.409     | 24.097      | 50.3     | 52.5       | 0.14      |
| 2 | 6.980             | 228.256     | 21.820      | 49.7     | 47.5       | 0.16      |
|   | Total             | 459.664     | 45.918      | 100.0    | 100.0      |           |

CHIRAL **8fa** (88% ee):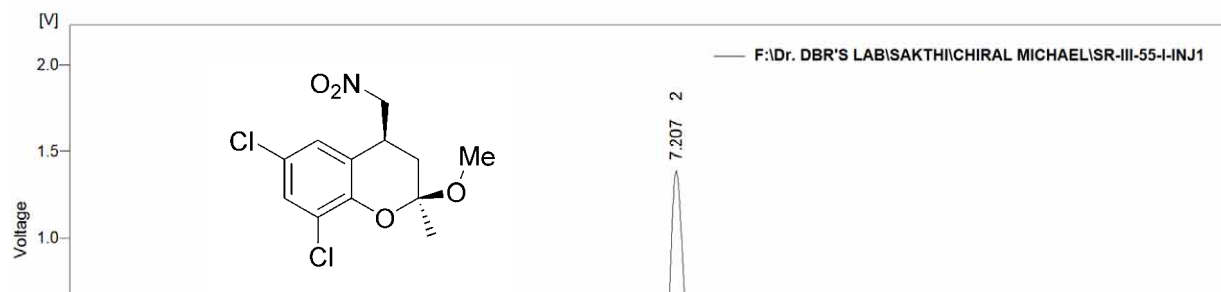

RACEMIC **9fa**: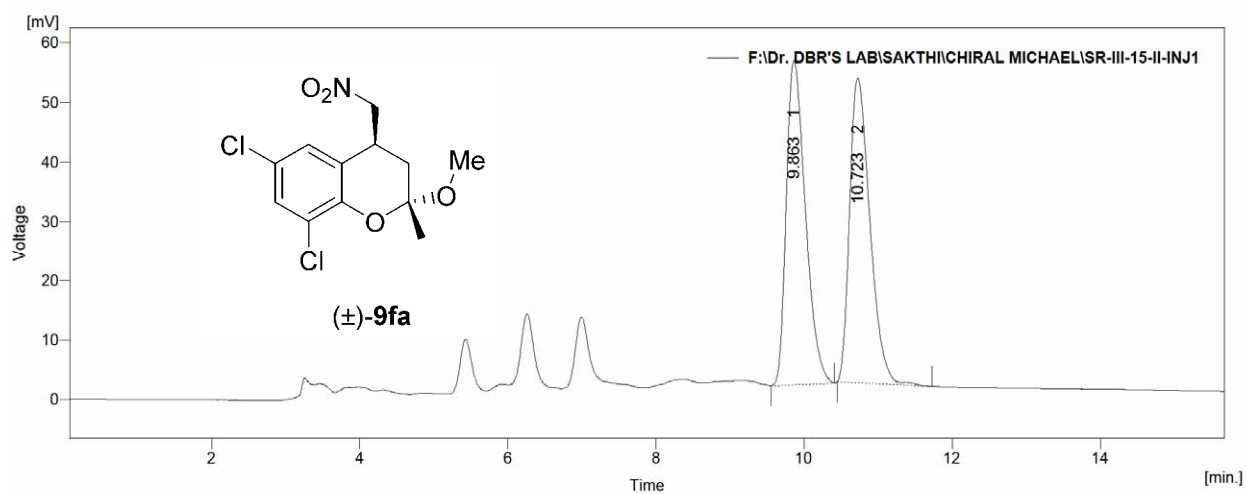

Daicel Chiralpak AS-H, Hexane/i-PrOH = 97:3, Flow Rate 1.0 mL/min, 254 nm.

Result Table (Uncal - F:\Dr. DBR'S LAB\SAKTHI\CHIRAL MICHAEL\SR-III-15-II-INJ1)

|   | Reten. Time [min] | Area [mV.s] | Height [mV] | Area [%] | Height [%] | W05 [min] |
|---|-------------------|-------------|-------------|----------|------------|-----------|
| 1 | 9.863             | 650.836     | 36.316      | 50.0     | 51.5       | 0.28      |
| 2 | 10.723            | 651.696     | 34.149      | 50.0     | 48.5       | 0.30      |
|   | Total             | 1302.532    | 70.465      | 100.0    | 100.0      |           |

CHIRAL **9fa** (91% ee):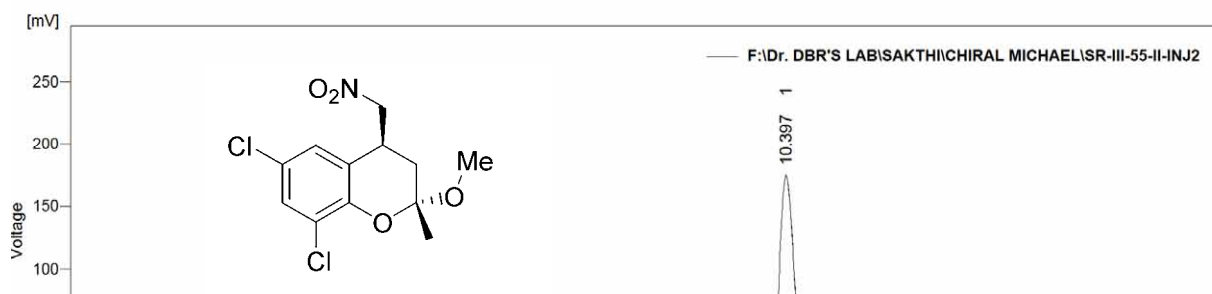



RACEMIC **8ga**: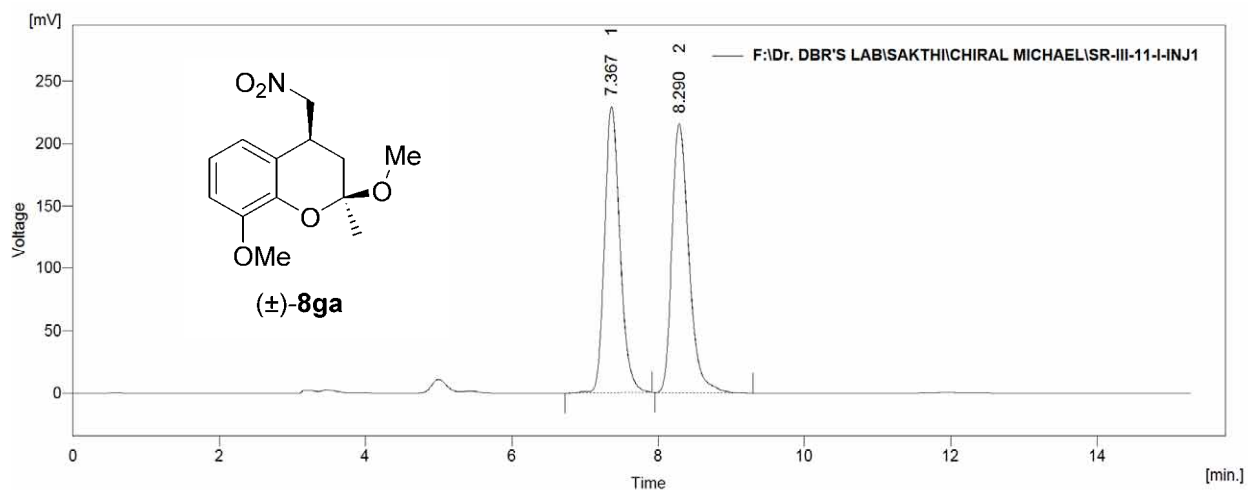

Daicel Chiralpak AS-H, Hexane/i-PrOH = 95:5, Flow Rate 1.0 mL/min, 254 nm.

Result Table (Uncal - F:\Dr. DBR'S LAB\SAKTHI\CHIRAL MICHAEL\SR-III-11-I-INJ1)

|   | Reten. Time [min] | Area [mV.s] | Height [mV] | Area [%] | Height [%] | W05 [min] |
|---|-------------------|-------------|-------------|----------|------------|-----------|
| 1 | 7.367             | 2275.419    | 152.987     | 49.5     | 51.6       | 0.23      |
| 2 | 8.290             | 2320.886    | 143.724     | 50.5     | 48.4       | 0.25      |
|   | Total             | 4596.305    | 296.712     | 100.0    | 100.0      |           |

CHIRAL **8ga** (79% ee):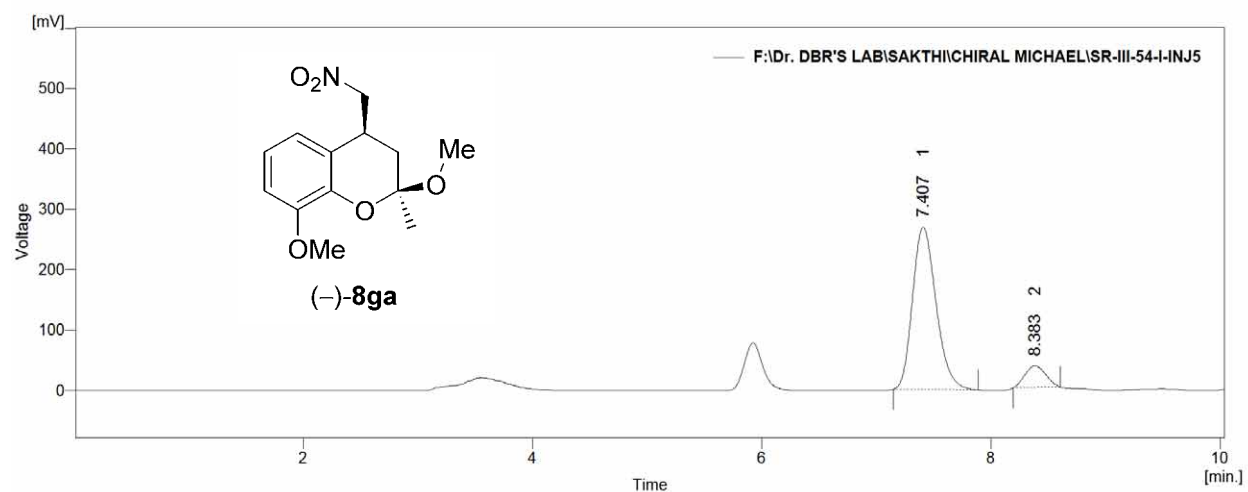

Daicel Chiralpak AS-H, Hexane/i-PrOH = 95:5, Flow Rate 1.0 mL/min, 254 nm.

Result Table (Uncal - F:\Dr. DBR'S LAB\SAKTHI\CHIRAL MICHAEL\SR-III-54-I-INJ5)

|   | Reten. Time [min] | Area [mV.s] | Height [mV] | Area [%] | Height [%] | W05 [min] |
|---|-------------------|-------------|-------------|----------|------------|-----------|
| 1 | 7.407             | 2555.666    | 178.894     | 89.5     | 88.3       | 0.22      |
| 2 | 8.383             | 300.186     | 23.719      | 10.5     | 11.7       | 0.21      |
|   | Total             | 2855.853    | 202.613     | 100.0    | 100.0      |           |

RACEMIC **9ga**: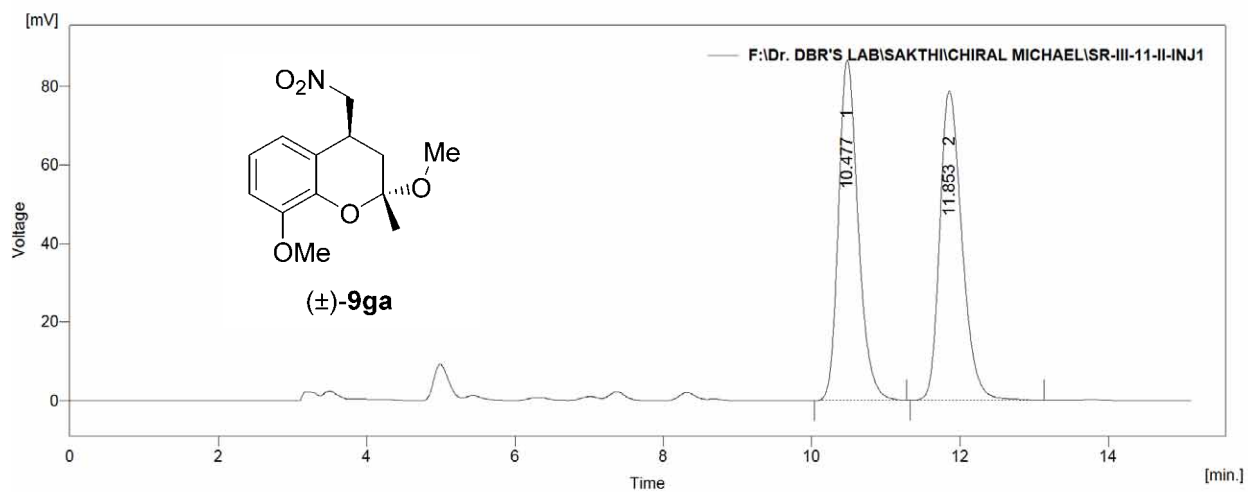

Daicel Chiralpak AS-H, Hexane/i-PrOH = 95:5, Flow Rate 1.0 mL/min, 254 nm.

Result Table (Uncal - F:\Dr. DBR'S LAB\SAKTHI\CHIRAL MICHAEL\SR-III-11-II-INJ1)

|   | Reten. Time [min] | Area [mV.s] | Height [mV] | Area [%] | Height [%] | W05 [min] |
|---|-------------------|-------------|-------------|----------|------------|-----------|
| 1 | 10.477            | 1067.374    | 57.706      | 49.6     | 52.4       | 0.28      |
| 2 | 11.853            | 1084.214    | 52.452      | 50.4     | 47.6       | 0.32      |
|   | Total             | 2151.588    | 110.158     | 100.0    | 100.0      |           |

CHIRAL **9ga** (79% ee):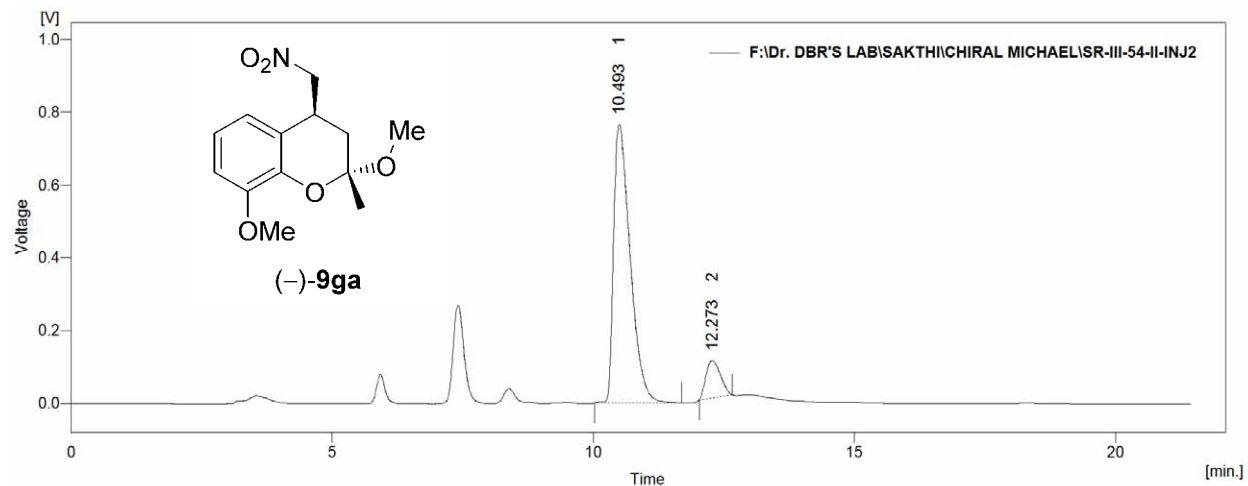Daicel Chiralpak AS-H, Hexane/*i*-PrOH = 95:5, Flow Rate 1.0 mL/min, 254 nm.

Result Table (Uncal - F:\Dr. DBR'S LAB\SAKTHI\CHIRAL MICHAEL\SR-III-54-II-INJ2)

|   | Reten. Time [min] | Area [mV.s] | Height [mV] | Area [%] | Height [%] | W05 [min] |
|---|-------------------|-------------|-------------|----------|------------|-----------|
| 1 | 10.493            | 11227.933   | 510.300     | 89.6     | 88.3       | 0.34      |
| 2 | 12.273            | 1302.253    | 67.913      | 10.4     | 11.7       | 0.33      |
|   | Total             | 12530.186   | 578.213     | 100.0    | 100.0      |           |

RACEMIC **8ha**: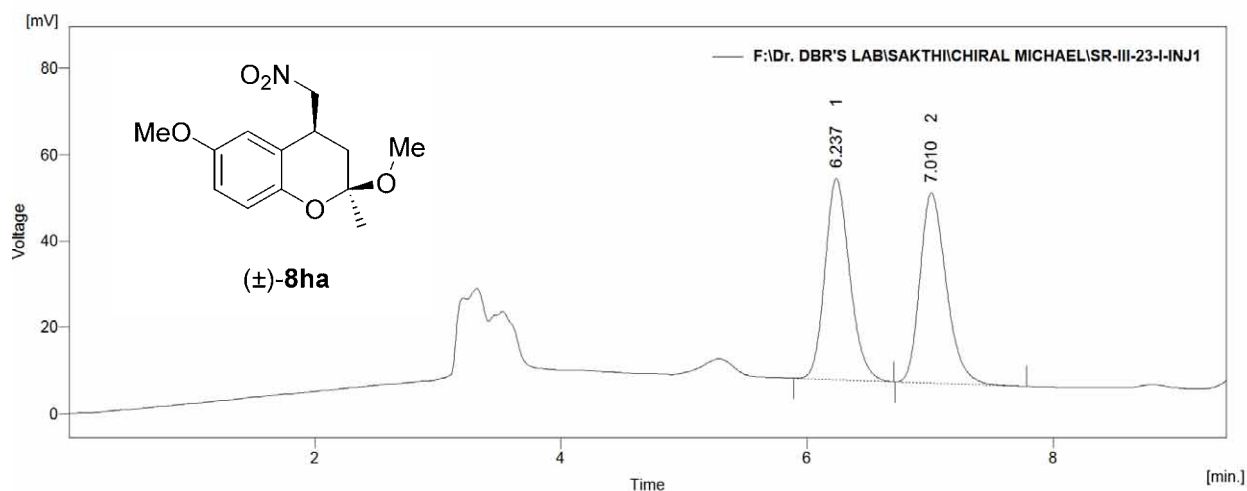Daicel Chiralpak AS-H, Hexane/*i*-PrOH = 95:5, Flow Rate 1.0 mL/min, 254 nm.

Result Table (Uncal - F:\Dr. DBR'S LAB\SAKTHI\CHIRAL MICHAEL\SR-III-23-I-INJ1)

|   | Reten. Time [min] | Area [mV.s] | Height [mV] | Area [%] | Height [%] | W05 [min] |
|---|-------------------|-------------|-------------|----------|------------|-----------|
| 1 | 6.237             | 434.580     | 31.141      | 49.8     | 51.4       | 0.22      |
| 2 | 7.010             | 437.651     | 29.391      | 50.2     | 48.6       | 0.23      |
|   | Total             | 872.231     | 60.532      | 100.0    | 100.0      |           |

CHIRAL **8ha** (79% ee):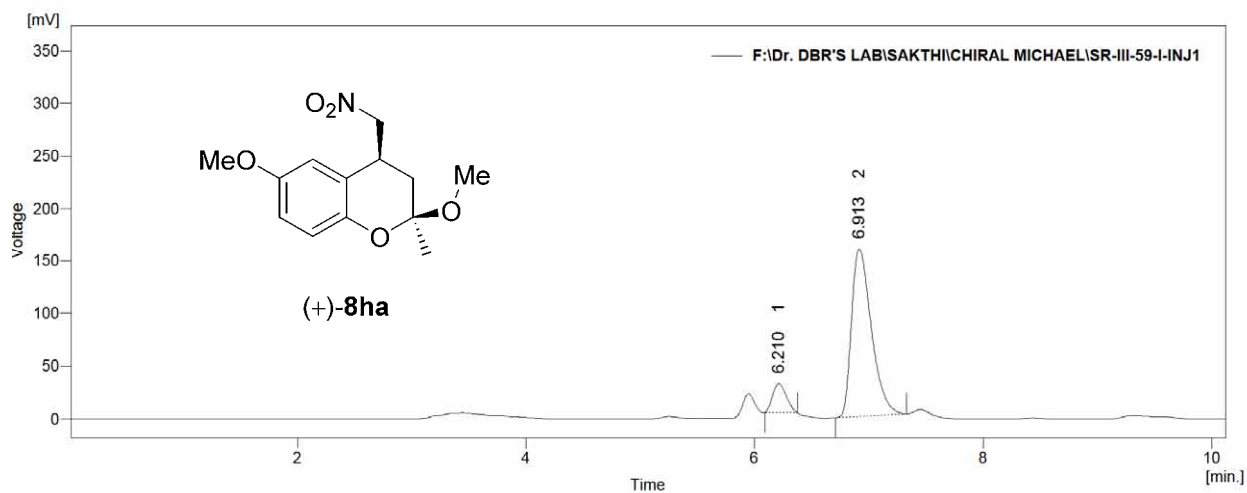

Daicel Chiralpak AS-H, Hexane/*i*-PrOH = 95:5, Flow Rate 1.0 mL/min, 254 nm.

Result Table (Uncal - F:\Dr. DBR'S LAB\SAKTHI\CHIRAL MICHAEL\SR-III-59-I-INJ1)

|   | Reten. Time [min] | Area [mV.s] | Height [mV] | Area [%] | Height [%] | W05 [min] |
|---|-------------------|-------------|-------------|----------|------------|-----------|
| 1 | 6.210             | 152.052     | 18.166      | 10.6     | 14.6       | 0.14      |
| 2 | 6.913             | 1276.552    | 106.159     | 89.4     | 85.4       | 0.19      |
|   | Total             | 1428.604    | 124.325     | 100.0    | 100.0      |           |

RACEMIC **9na**: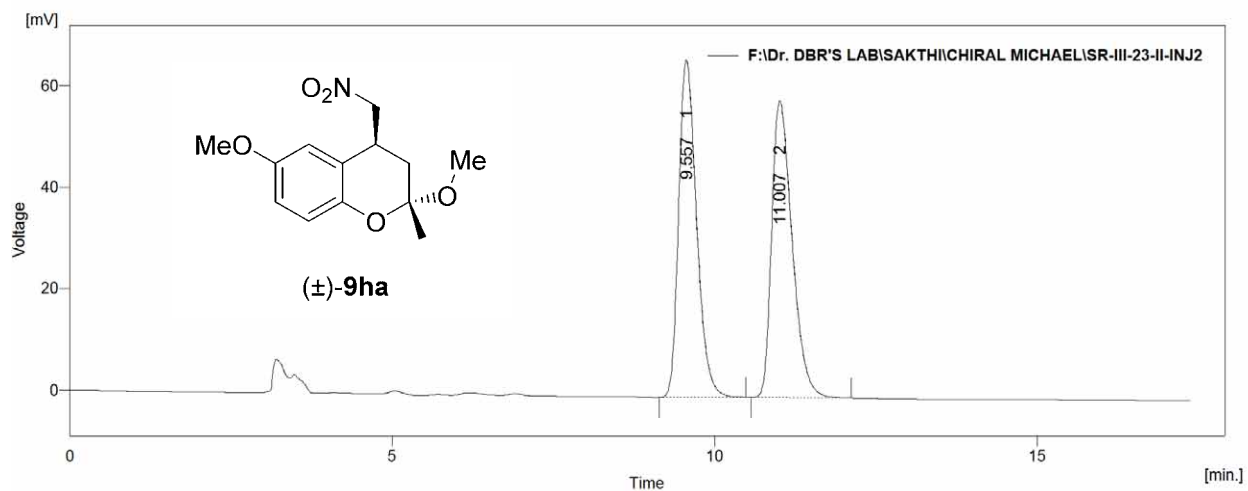

Daicel Chiralpak AS-H, Hexane/*i*-PrOH = 95:5, Flow Rate 1.0 mL/min, 254 nm.

Result Table (Uncal - F:\Dr. DBR'S LAB\SAKTHI\CHIRAL MICHAEL\SR-III-23-II-INJ2)

|   | Reten. Time [min] | Area [mV.s] | Height [mV] | Area [%] | Height [%] | W05 [min] |
|---|-------------------|-------------|-------------|----------|------------|-----------|
| 1 | 9.557             | 851.832     | 44.296      | 49.8     | 53.2       | 0.30      |
| 2 | 11.007            | 857.264     | 38.965      | 50.2     | 46.8       | 0.34      |
|   | Total             | 1709.097    | 83.261      | 100.0    | 100.0      |           |

CHIRAL **9ha** (79% ee):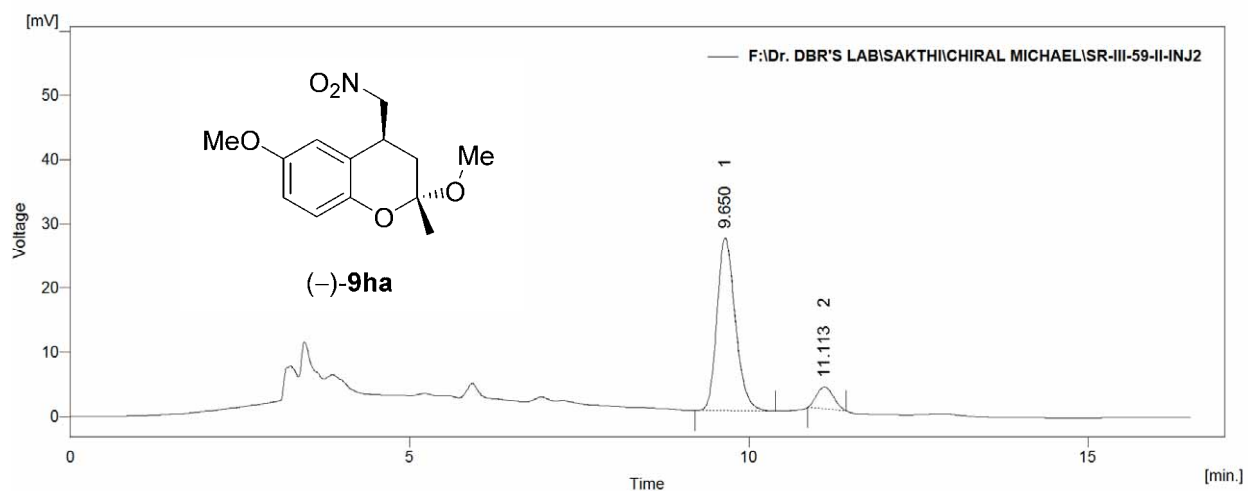Daicel Chiralpak AS-H, Hexane/*i*-PrOH = 95:5, Flow Rate 1.0 mL/min, 254 nm.

Result Table (Uncal - F:\Dr. DBR'S LAB\SAKTHI\CHIRAL MICHAEL\SR-III-59-II-INJ2)

|   | Reten. Time [min] | Area [mV.s] | Height [mV] | Area [%] | Height [%] | W05 [min] |
|---|-------------------|-------------|-------------|----------|------------|-----------|
| 1 | 9.650             | 337.052     | 17.943      | 89.6     | 88.8       | 0.29      |
| 2 | 11.113            | 39.166      | 2.264       | 10.4     | 11.2       | 0.28      |
|   | Total             | 376.219     | 20.207      | 100.0    | 100.0      |           |

RACEMIC **8ia**: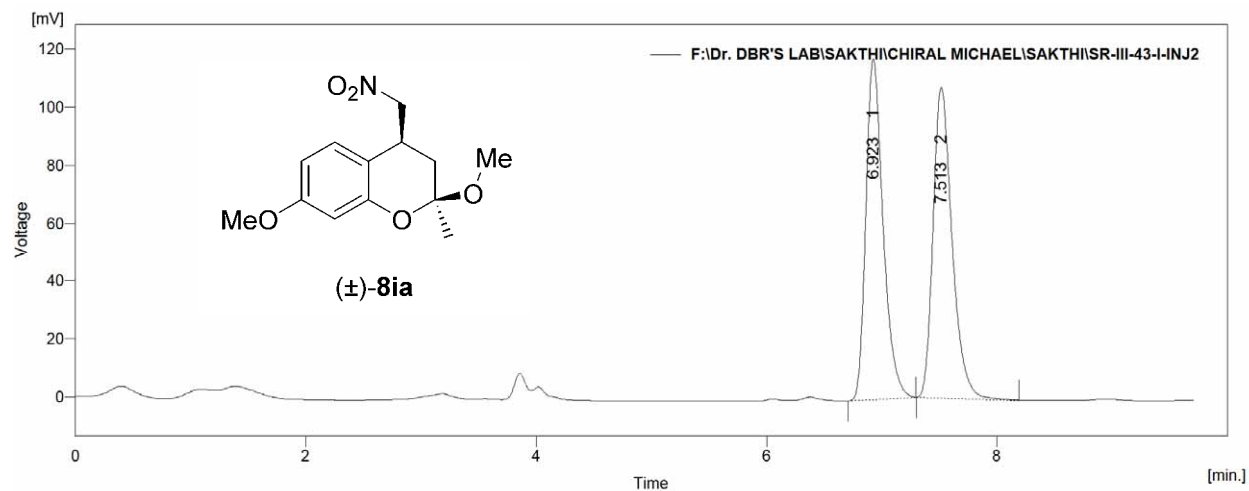Daicel Chiralpak AS-H, Hexane/*i*-PrOH = 95:5, Flow Rate 1.0 mL/min, 254 nm.

Result Table (Uncal - F:\Dr. DBR'S LAB\SAKTHI\CHIRAL MICHAEL\SAKTHI\SR-III-43-I-INJ2)

|   | Reten. Time [min] | Area [mV.s] | Height [mV] | Area [%] | Height [%] | W05 [min] |
|---|-------------------|-------------|-------------|----------|------------|-----------|
| 1 | 6.923             | 813.479     | 78.344      | 49.9     | 52.3       | 0.16      |
| 2 | 7.513             | 818.152     | 71.508      | 50.1     | 47.7       | 0.17      |
|   | Total             | 1631.631    | 149.852     | 100.0    | 100.0      |           |

CHIRAL **8ia** (80% ee):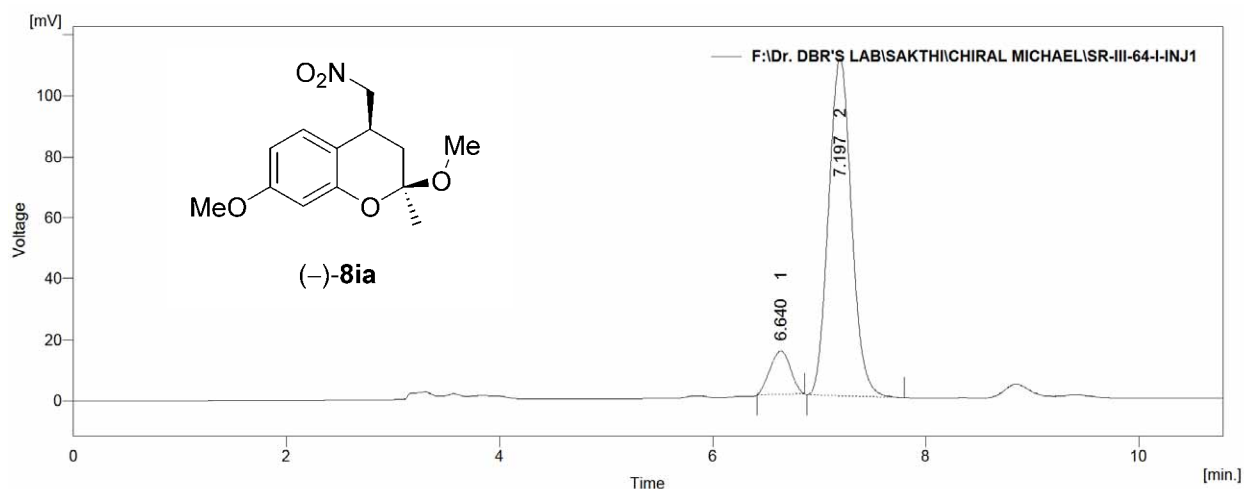

Daicel Chiralpak AS-H, Hexane/*i*-PrOH = 95:5, Flow Rate 1.0 mL/min, 254 nm.

Result Table (Uncal - F:\Dr. DBR'S LAB\SAKTHI\CHIRAL MICHAEL\SR-III-64-I-INJ1)

|   | Reten. Time [min] | Area [mV.s] | Height [mV] | Area [%] | Height [%] | W05 [min] |
|---|-------------------|-------------|-------------|----------|------------|-----------|
| 1 | 6.640             | 124.179     | 9.365       | 10.1     | 11.3       | 0.22      |
| 2 | 7.197             | 1100.346    | 73.668      | 89.9     | 88.7       | 0.24      |
|   | Total             | 1224.525    | 83.033      | 100.0    | 100.0      |           |

RACEMIC **9ia**: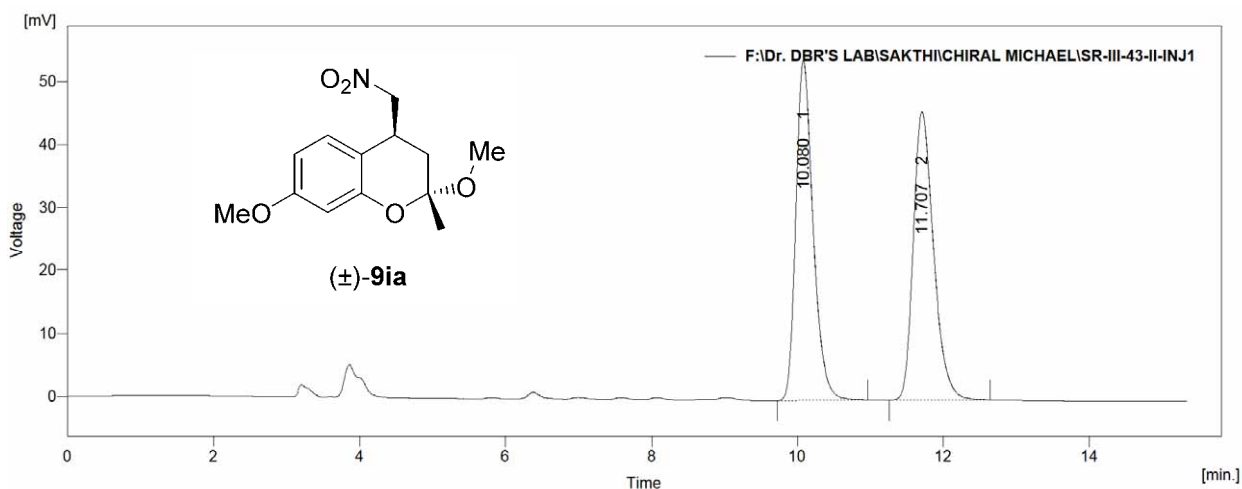

Daicel Chiralpak AS-H, Hexane/*i*-PrOH = 95:5, Flow Rate 1.0 mL/min, 254 nm.

Result Table (Uncal - F:\Dr. DBR'S LAB\SAKTHI\CHIRAL MICHAEL\SR-III-43-II-INJ1)

|   | Reten. Time [min] | Area [mV.s] | Height [mV] | Area [%] | Height [%] | W05 [min] |
|---|-------------------|-------------|-------------|----------|------------|-----------|
| 1 | 10.080            | 584.144     | 35.934      | 49.9     | 54.1       | 0.25      |
| 2 | 11.707            | 585.317     | 30.472      | 50.1     | 45.9       | 0.29      |
|   | Total             | 1169.461    | 66.407      | 100.0    | 100.0      |           |

CHIRAL **9ia** (80% ee):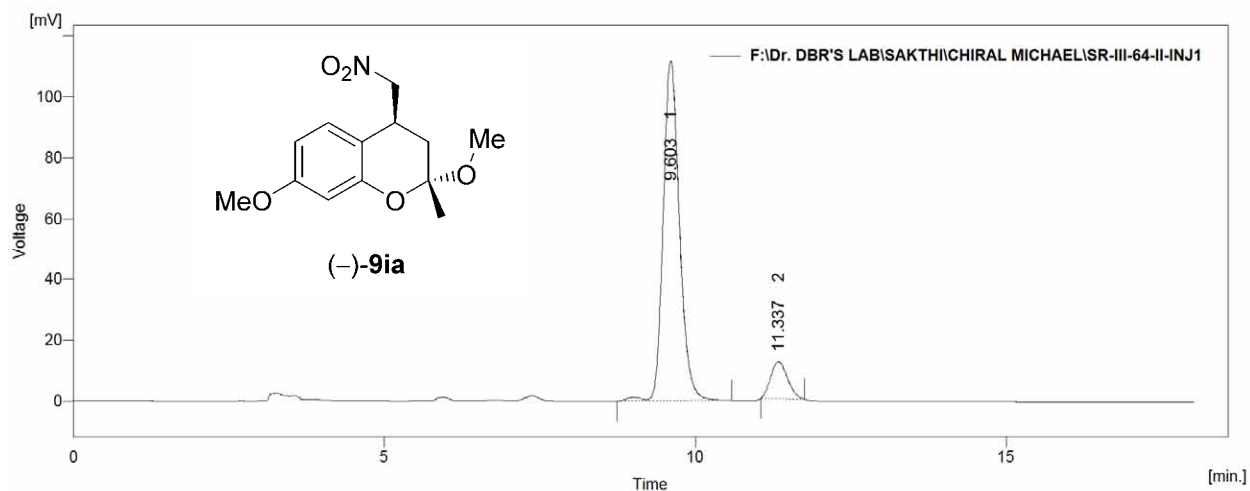Daicel Chiralpak AS-H, Hexane/*i*-PrOH = 95:5, Flow Rate 1.0 mL/min, 254 nm.

Result Table (Uncal - F:\Dr. DBR'S LAB\SAKTHI\CHIRAL MICHAEL\SR-III-64-II-INJ1)

|   | Reten. Time [min] | Area [mV.s] | Height [mV] | Area [%] | Height [%] | W05 [min] |
|---|-------------------|-------------|-------------|----------|------------|-----------|
| 1 | 9.603             | 1358.717    | 74.588      | 89.9     | 90.2       | 0.28      |
| 2 | 11.337            | 152.684     | 8.117       | 10.1     | 9.8        | 0.30      |
|   | Total             | 1511.401    | 82.706      | 100.0    | 100.0      |           |

RACEMIC **8ja**: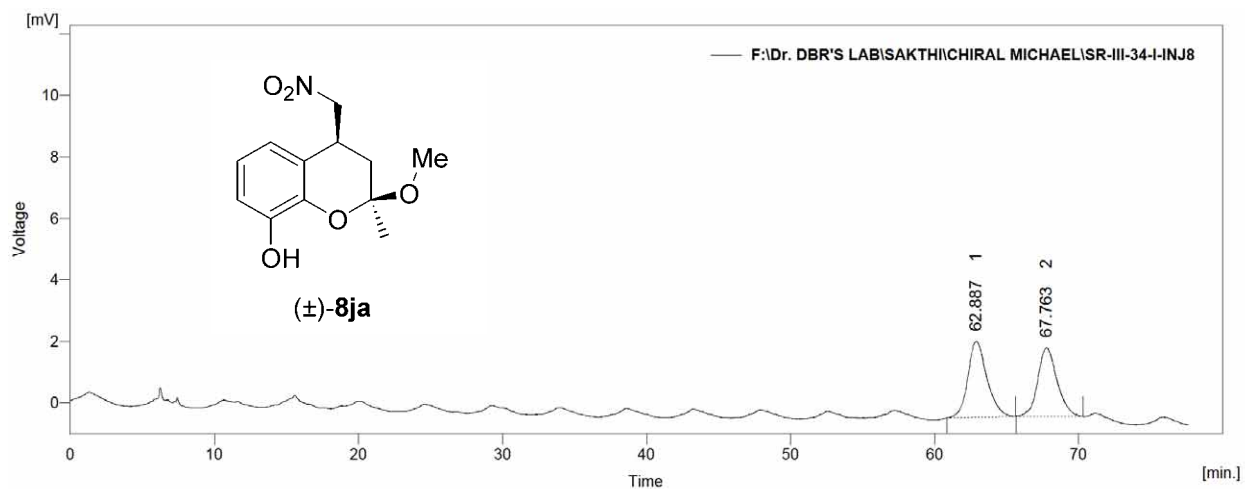Daicel Chiralpak AD-H, Hexane/*i*-PrOH = 98:2, Flow Rate 0.5 mL/min, 254 nm.

Result Table (Uncal - F:\Dr. DBR'S LAB\SAKTHI\CHIRAL MICHAEL\SR-III-34-I-INJ8)

|   | Reten. Time [min] | Area [mV.s] | Height [mV] | Area [%] | Height [%] | W05 [min] |
|---|-------------------|-------------|-------------|----------|------------|-----------|
| 1 | 62.887            |             |             |          |            |           |
| 2 | 67.763            |             |             |          |            |           |

CHIRAL **8ja** (83% ee):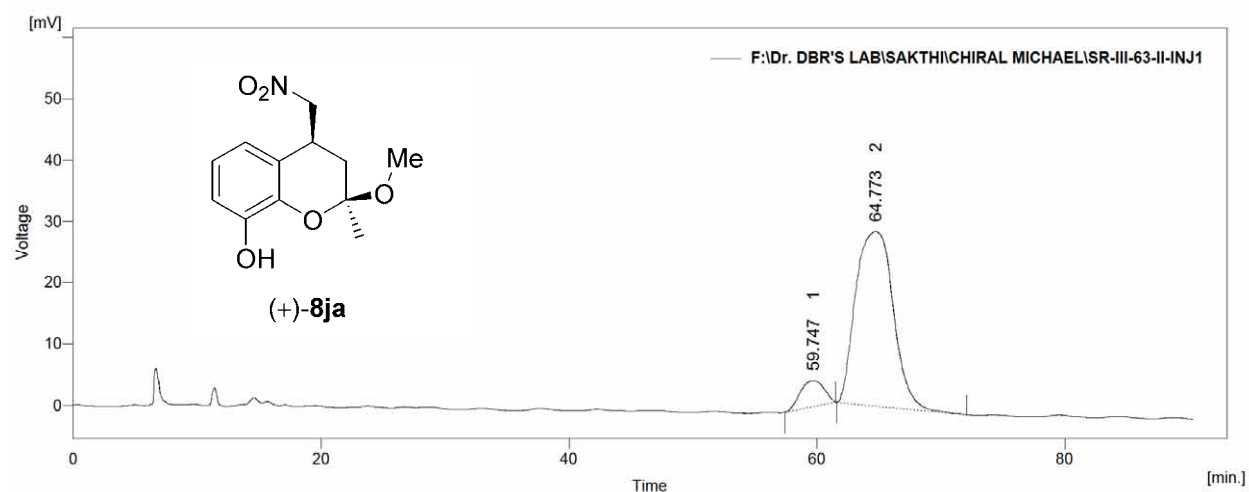

Daicel Chiralpak AD-H, Hexane/*i*-PrOH = 98:2, Flow Rate 0.5 mL/min, 254 nm.

Result Table (Uncal - F:\Dr. DBR'S LAB\SAKTHI\CHIRAL MICHAEL\SR-III-63-II-INJ1)

|   | Reten. Time [min] | Area [mV.s] | Height [mV] | Area [%] | Height [%] | W05 [min] |
|---|-------------------|-------------|-------------|----------|------------|-----------|
| 1 | 59.747            | 379.144     | 2.810       | 8.7      | 12.9       | 2.27      |
| 2 | 64.773            | 3986.933    | 19.011      | 91.3     | 87.1       | 3.38      |
|   | Total             | 4366.077    | 21.822      | 100.0    | 100.0      |           |

RACEMIC **9ja**: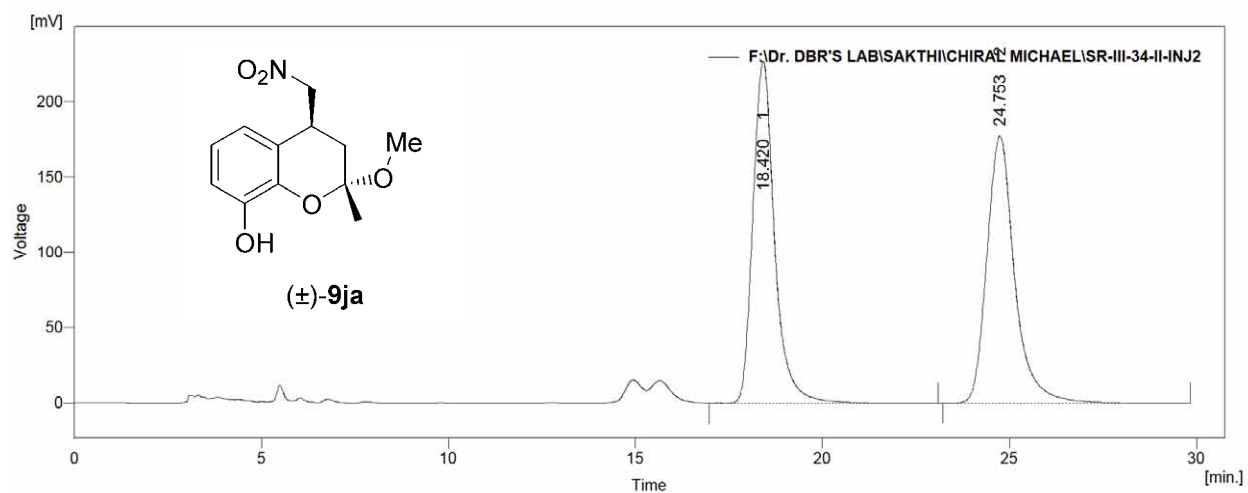



Daicel Chiralpak AD-H, Hexane/i-PrOH = 95:5, Flow Rate 1.0 mL/min, 254 nm.

Result Table (Uncal - F:\Dr. DBR'S LAB\SAKTHI\CHIRAL MICHAEL\SR-III-34-II-INJ2)

|   | Reten. Time [min] | Area [mV.s] | Height [mV] | Area [%] | Height [%] | W05 [min] |
|---|-------------------|-------------|-------------|----------|------------|-----------|
| 1 | 18.420            | 6080.990    | 151.245     | 49.8     | 56.1       | 0.60      |
| 2 | 24.753            | 6124.138    | 118.452     | 50.2     | 43.9       | 0.75      |
|   | Total             | 12205.128   | 269.696     | 100.0    | 100.0      |           |

CHIRAL **9ja** (82% ee):

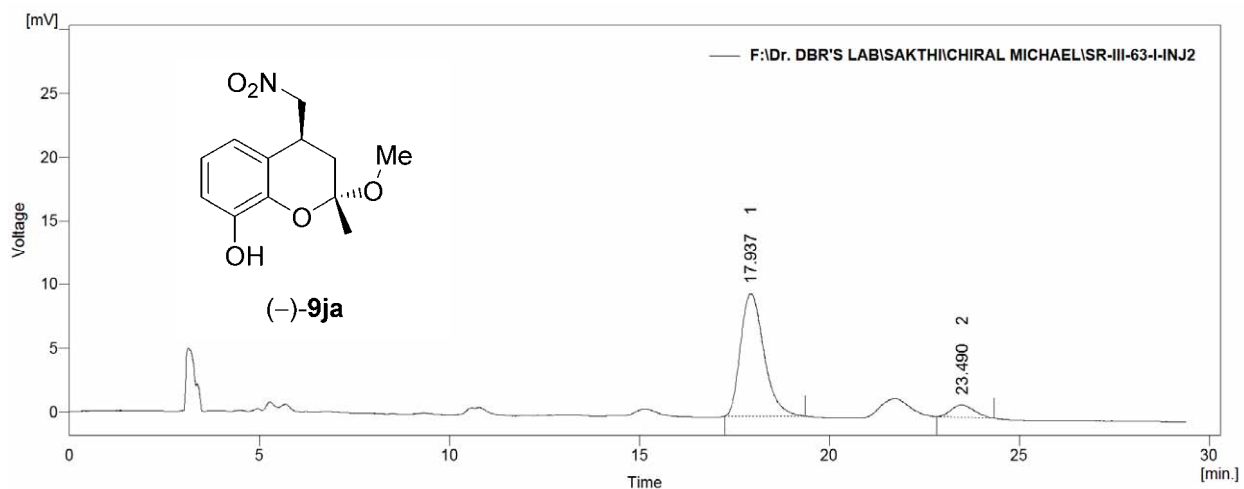

Daicel Chiralpak AD-H, Hexane/i-PrOH = 95:5, Flow Rate 1.0 mL/min, 254 nm.

Result Table (Uncal - F:\Dr. DBR'S LAB\SAKTHI\CHIRAL MICHAEL\SR-III-63-I-INJ2)

|   | Reten. Time [min] | Area [mV.s] | Height [mV] | Area [%] | Height [%] | W05 [min] |
|---|-------------------|-------------|-------------|----------|------------|-----------|
| 1 | 17.937            | 273.949     | 6.380       | 91.0     | 90.9       | 0.66      |
| 2 | 23.490            | 27.204      | 0.638       | 9.0      | 9.1        | 0.68      |
|   | Total             | 301.154     | 7.018       | 100.0    | 100.0      |           |

RACEMIC **8ka**:

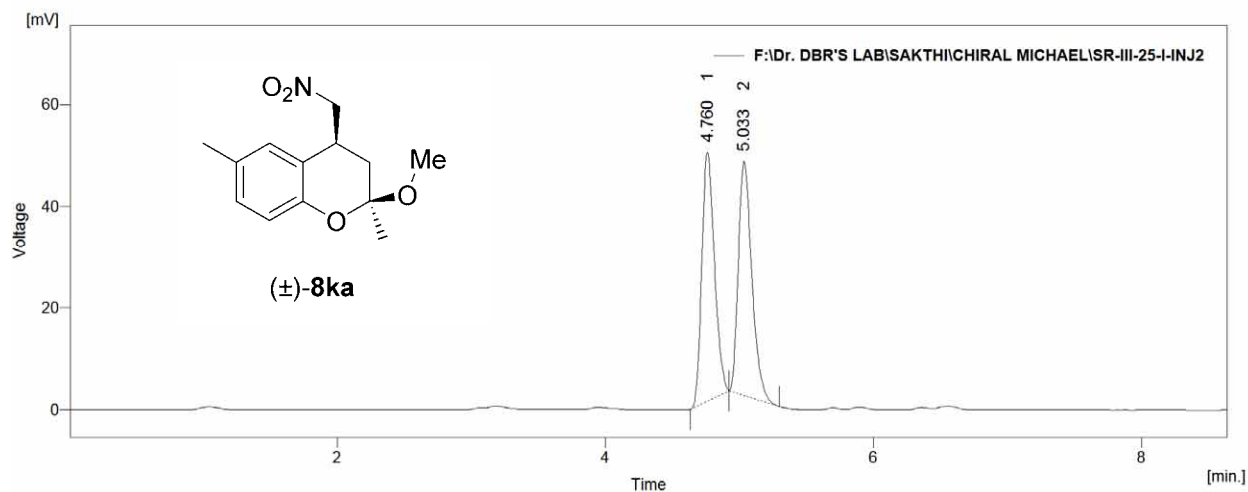

CHIRAL **8ka** (92% ee):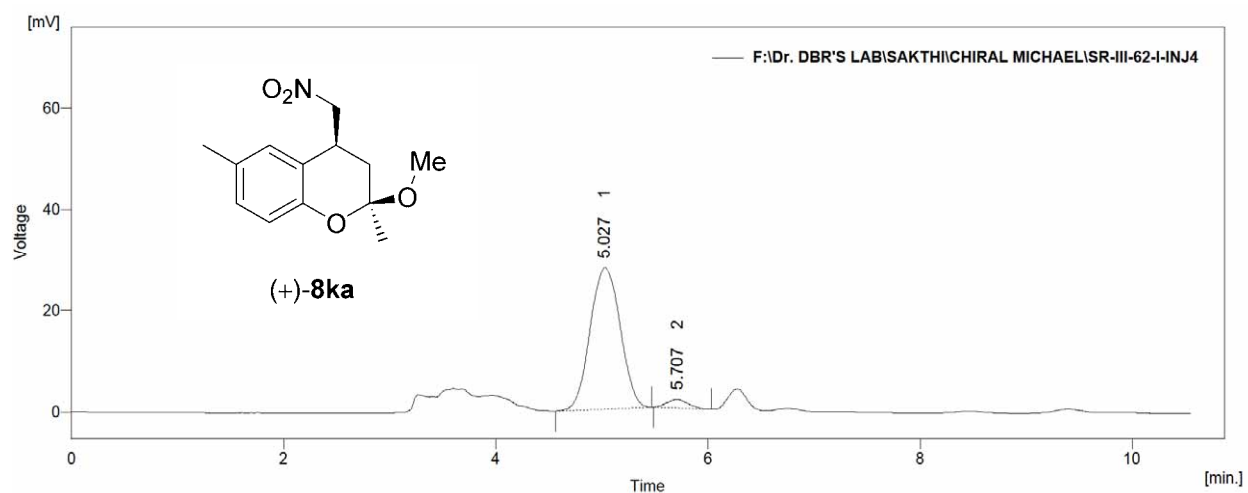

Daicel Chiralpak AS-H, Hexane/*i*-PrOH = 97:3, Flow Rate 1.0 mL/min, 254 nm.

Result Table (Uncal - F:\Dr. DBR'S LAB\SAKTHI\CHIRAL MICHAEL\SR-III-62-I-INJ4)

|   | Reten. Time [min] | Area [mV.s] | Height [mV] | Area [%] | Height [%] | W05 [min] |
|---|-------------------|-------------|-------------|----------|------------|-----------|
| 1 | 5.027             | 364.215     | 18.507      | 95.9     | 94.4       | 0.32      |
| 2 | 5.707             | 15.573      | 1.088       | 4.1      | 5.6        | 0.23      |
|   | Total             | 379.788     | 19.595      | 100.0    | 100.0      |           |

RACEMIC **9ka**.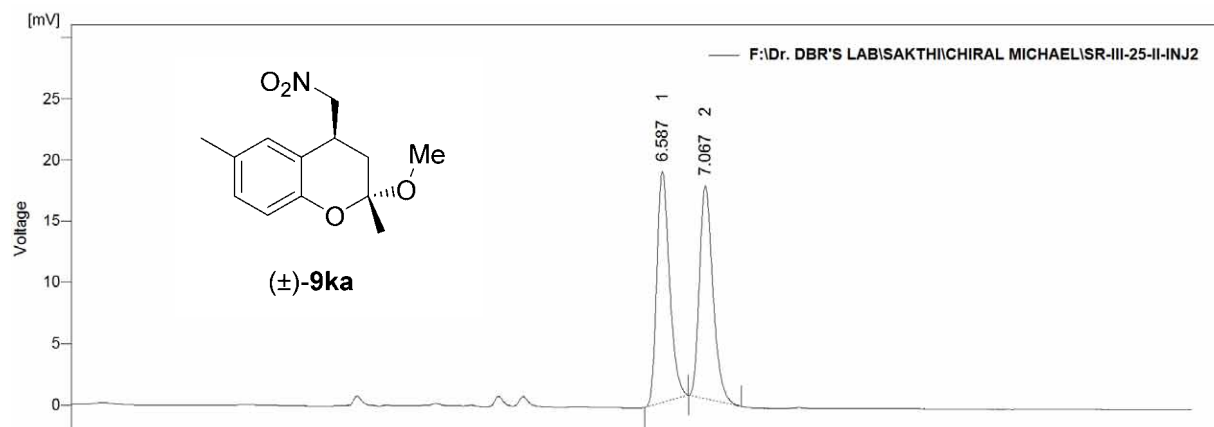

CHIRAL **9ka** (89% ee):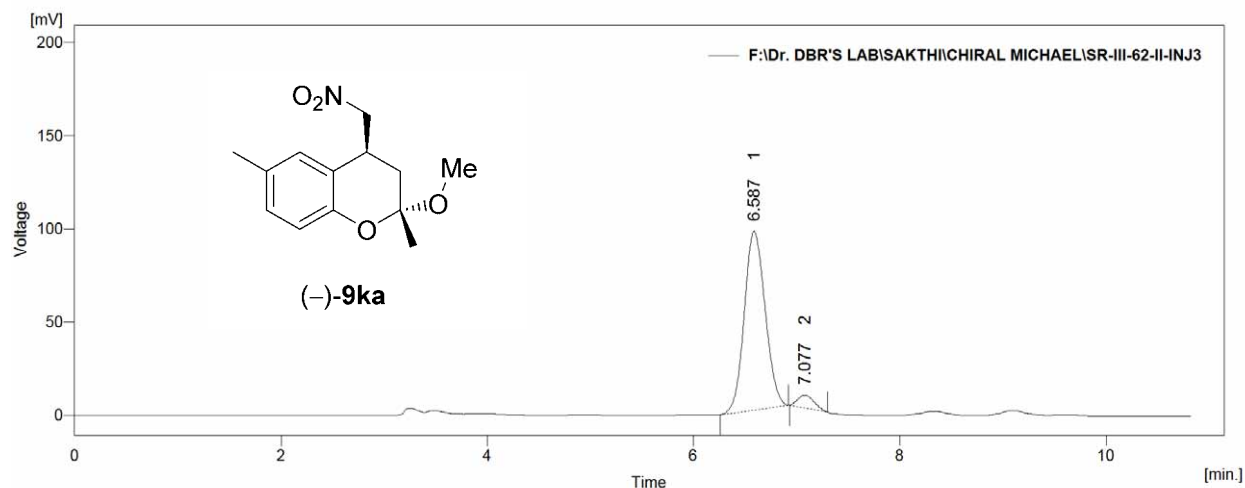

Daicel Chiralpak AS-H, Hexane/i-PrOH = 97:3, Flow Rate 1.0 mL/min, 254 nm.

Result Table (Uncal - F:\Dr. DBR'S LAB\SAKTHI\CHIRAL MICHAEL\SR-III-62-II-INJ3)

|   | Reten. Time [min] | Area [mV.s] | Height [mV] | Area [%] | Height [%] | W05 [min] |
|---|-------------------|-------------|-------------|----------|------------|-----------|
| 1 | 6.587             | 894.877     | 63.995      | 94.7     | 93.5       | 0.22      |
| 2 | 7.077             | 50.331      | 4.452       | 5.3      | 6.5        | 0.18      |
|   | Total             | 945.208     | 68.447      | 100.0    | 100.0      |           |

CHIRAL **8ka-D<sub>5</sub>** (89% ee):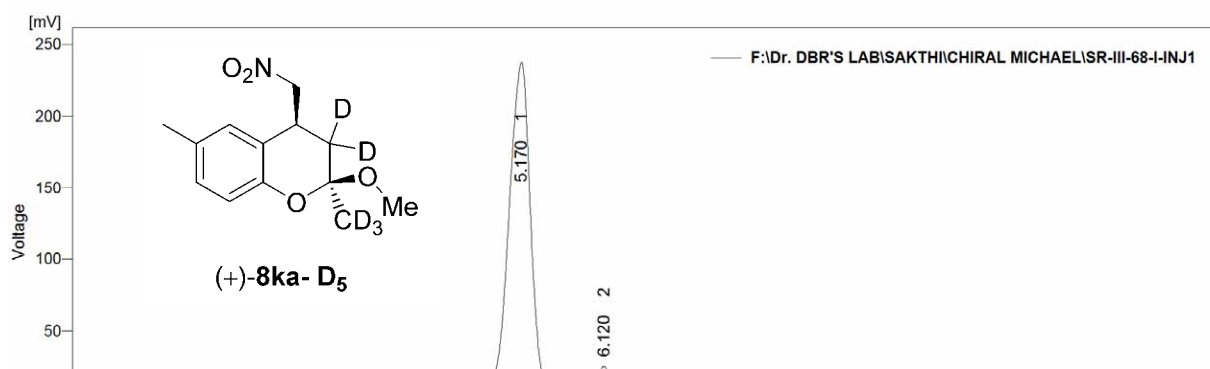

CHIRAL **9ka-D<sub>5</sub>** (89% ee):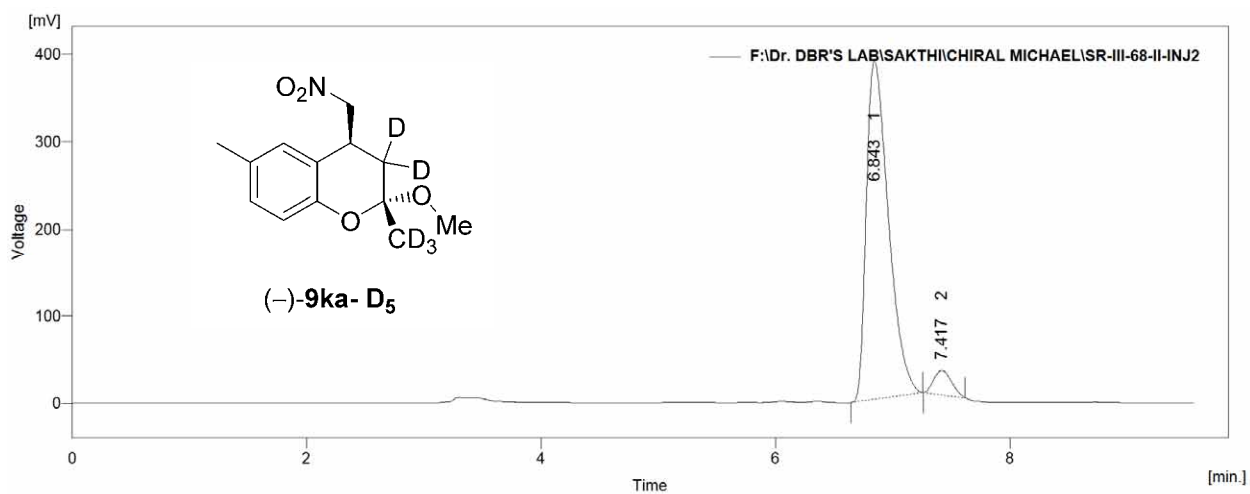

Daicel Chiralpak AS-H, Hexane/i-PrOH = 97:3, Flow Rate 1.0 mL/min, 254 nm.

Result Table (Uncal - F:\Dr. DBR'S LAB\SAKTHI\CHIRAL MICHAEL\SR-III-68-II-INJ2)

|   | Reten. Time [min] | Area [mV.s] | Height [mV] | Area [%] | Height [%] | W05 [min] |
|---|-------------------|-------------|-------------|----------|------------|-----------|
| 1 | 6.843             | 3390.845    | 258.803     | 94.5     | 93.3       | 0.21      |
| 2 | 7.417             | 198.563     | 18.684      | 5.5      | 6.7        | 0.18      |
|   | Total             | 3589.408    | 277.487     | 100.0    | 100.0      |           |

RACEMIC **8ab**: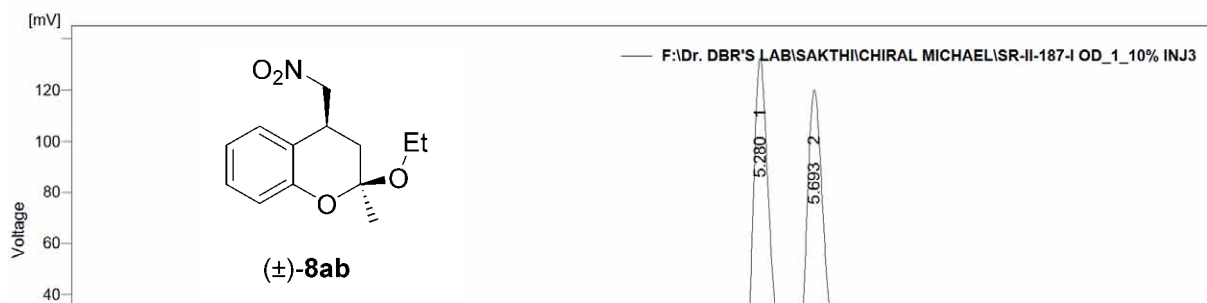

CHIRAL **8ab** (80% ee):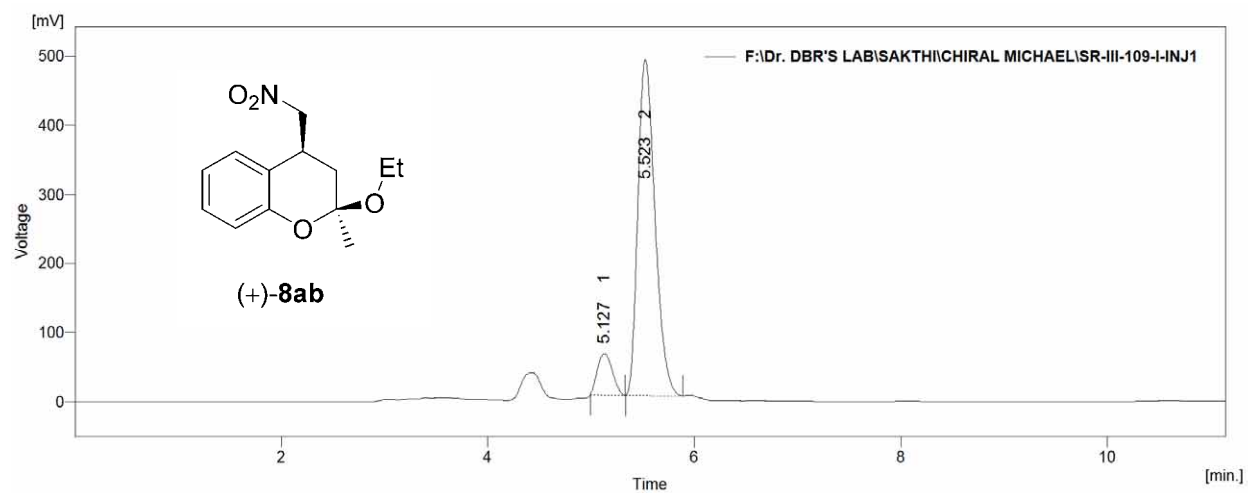

Daicel Chiralcel OD-H, Hexane/i-PrOH = 90:10, Flow Rate 1.0 mL/min, 254 nm.

Result Table (Uncal - F:\Dr. DBR'S LAB\SAKTHI\CHIRAL MICHAEL\SR-III-109-I-INJ1)

|   | Reten. Time [min] | Area [mV.s] | Height [mV] | Area [%] | Height [%] | W05 [min] |
|---|-------------------|-------------|-------------|----------|------------|-----------|
| 1 | 5.127             | 401.974     | 40.009      | 9.7      | 11.0       | 0.17      |
| 2 | 5.523             | 3724.883    | 324.028     | 90.3     | 89.0       | 0.18      |
|   | Total             | 4126.857    | 364.038     | 100.0    | 100.0      |           |

RACEMIC **9ab**:

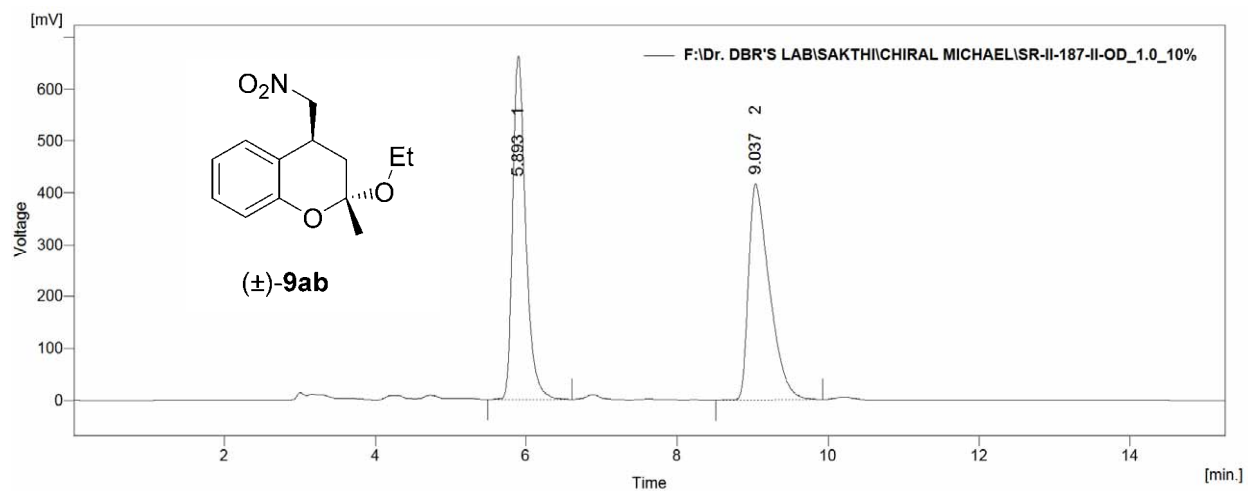

Daicel Chiralcel OD-H, Hexane/*i*-PrOH = 90:10, Flow Rate 1.0 mL/min, 254 nm.

Result Table (Uncal - F:\Dr. DBR'S LAB\SAKTHI\CHIRAL MICHAEL\SR-II-187-II-OD\_1.0\_10%)

|   | Reten. Time [min] | Area [mV.s] | Height [mV] | Area [%] | Height [%] | W05 [min] |
|---|-------------------|-------------|-------------|----------|------------|-----------|
| 1 | 5.893             | 5284.193    | 441.731     | 49.9     | 61.4       | 0.18      |
| 2 | 9.037             | 5312.705    | 277.583     | 50.1     | 38.6       | 0.30      |
|   | Total             | 10596.898   | 719.314     | 100.0    | 100.0      |           |

CHIRAL **9ab** (80% ee):

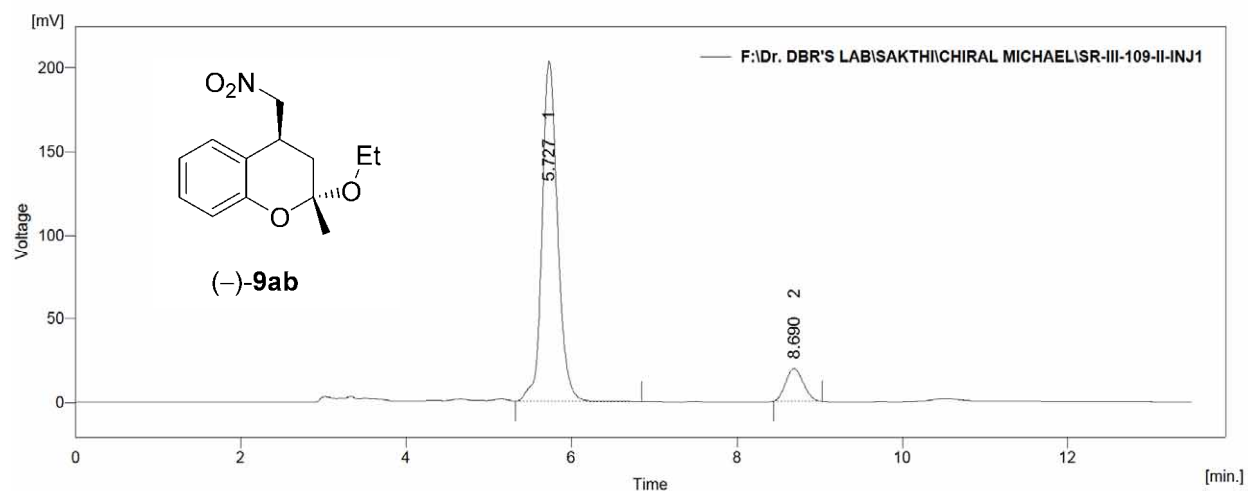

Daicel Chiralcel OD-H, Hexane/*i*-PrOH = 90:10, Flow Rate 1.0 mL/min, 254 nm.

Result Table (Uncal - F:\Dr. DBR'S LAB\SAKTHI\CHIRAL MICHAEL\SR-III-109-II-INJ1)

|   | Reten. Time [min] | Area [mV.s] | Height [mV] | Area [%] | Height [%] | W05 [min] |
|---|-------------------|-------------|-------------|----------|------------|-----------|
| 1 | 5.727             | 1771.027    | 135.481     | 90.2     | 91.2       | 0.20      |
| 2 | 8.690             | 193.345     | 13.046      | 9.8      | 8.8        | 0.24      |
|   | Total             | 1964.372    | 148.528     | 100.0    | 100.0      |           |

**RACEMIC 8eb:**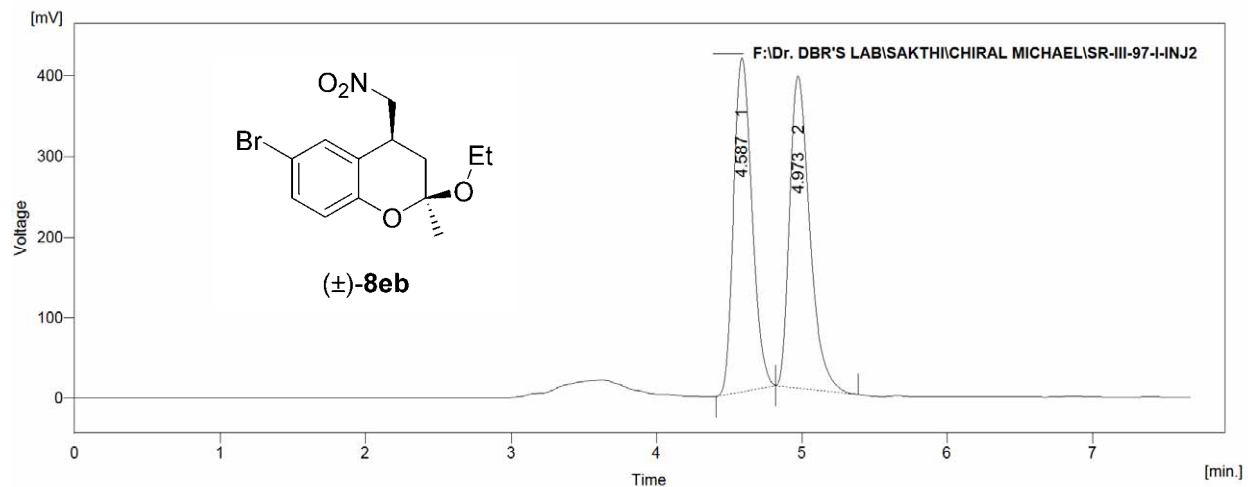

Daicel Chiralpak AS-H, Hexane/*i*-PrOH = 90:10, Flow Rate 1.0 mL/min, 254 nm.

Result Table (Uncal - F:\Dr. DBR'S LAB\SAKTHI\CHIRAL MICHAEL\SR-III-97-I-INJ2)

|   | Reten. Time [min] | Area [mV.s] | Height [mV] | Area [%] | Height [%] | W05 [min] |
|---|-------------------|-------------|-------------|----------|------------|-----------|
| 1 | 4.587             | 2421.094    | 276.036     | 49.5     | 51.7       | 0.14      |
| 2 | 4.973             | 2471.258    | 258.029     | 50.5     | 48.3       | 0.15      |
|   | Total             | 4892.352    | 534.065     | 100.0    | 100.0      |           |

**CHIRAL 8eb (88% ee):**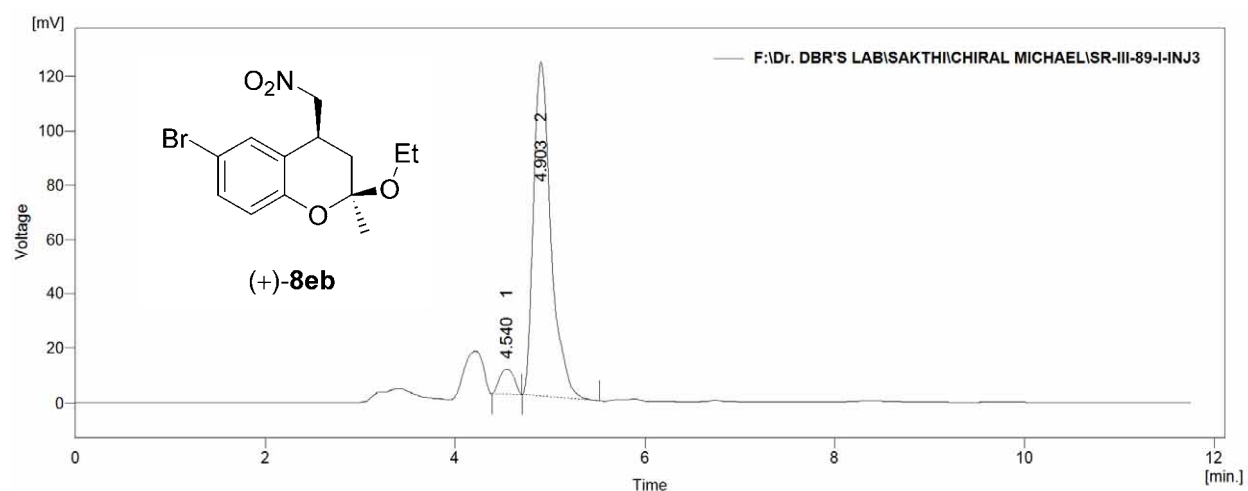

Daicel Chiralpak AS-H, Hexane/*i*-PrOH = 90:10, Flow Rate 1.0 mL/min, 254 nm.

Result Table (Uncal - F:\Dr. DBR'S LAB\SAKTHI\CHIRAL MICHAEL\SR-III-89-I-INJ3)

|   | Reten. Time [min] | Area [mV.s] | Height [mV] | Area [%] | Height [%] | W05 [min] |
|---|-------------------|-------------|-------------|----------|------------|-----------|
| 1 | 4.540             | 65.507      | 6.125       | 5.9      | 7.0        | 0.19      |
| 2 | 4.903             | 1041.022    | 81.594      | 94.1     | 93.0       | 0.19      |
|   | Total             | 1106.530    | 87.719      | 100.0    | 100.0      |           |

RACEMIC **9eb**: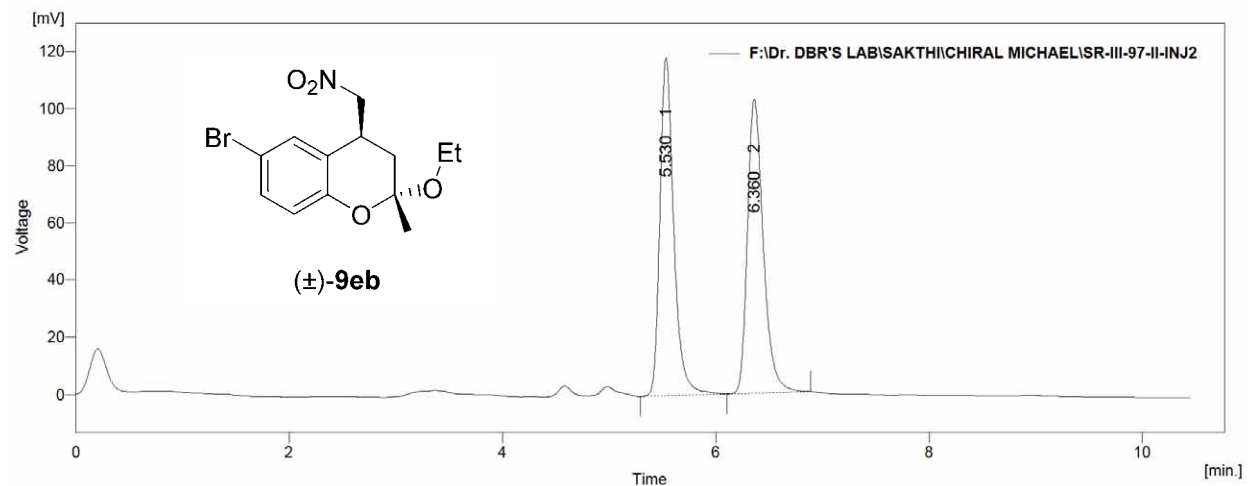

Daicel Chiralpak AS-H, Hexane/*i*-PrOH = 90:10, Flow Rate 1.0 mL/min, 254 nm.

Result Table (Uncal - F:\Dr. DBR'S LAB\SAKTHI\CHIRAL MICHAEL\SR-III-97-II-INJ2)

|   | Reten. Time [min] | Area [mV.s] | Height [mV] | Area [%] | Height [%] | W05 [min] |
|---|-------------------|-------------|-------------|----------|------------|-----------|
| 1 | 5.530             | 709.787     | 78.651      | 50.1     | 53.4       | 0.14      |
| 2 | 6.360             | 706.892     | 68.562      | 49.9     | 46.6       | 0.16      |
|   | Total             | 1416.679    | 147.214     | 100.0    | 100.0      |           |

CHIRAL **9eb** (82% ee):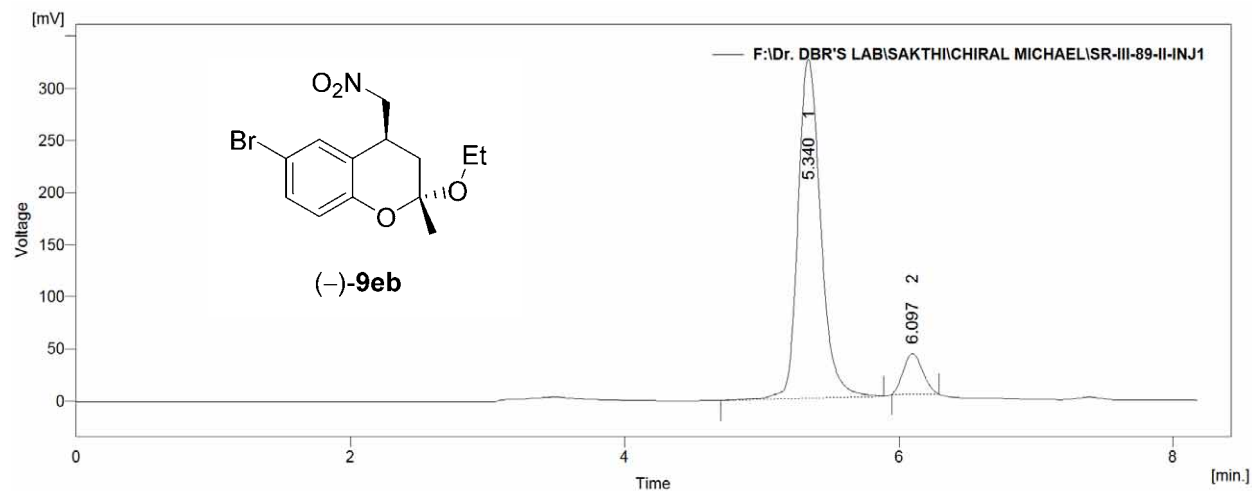

Daicel Chiralpak AS-H, Hexane/*i*-PrOH = 90:10, Flow Rate 1.0 mL/min, 254 nm.

Result Table (Uncal - F:\Dr. DBR'S LAB\SAKTHI\CHIRAL MICHAEL\SR-III-89-II-INJ1)

|   | Reten. Time [min] | Area [mV.s] | Height [mV] | Area [%] | Height [%] | W05 [min] |
|---|-------------------|-------------|-------------|----------|------------|-----------|
| 1 | 5.340             | 2481.844    | 216.504     | 90.8     | 89.4       | 0.18      |
| 2 | 6.097             | 251.696     | 25.696      | 9.2      | 10.6       | 0.16      |
|   | Total             | 2733.540    | 242.201     | 100.0    | 100.0      |           |



RACEMIC **10a**: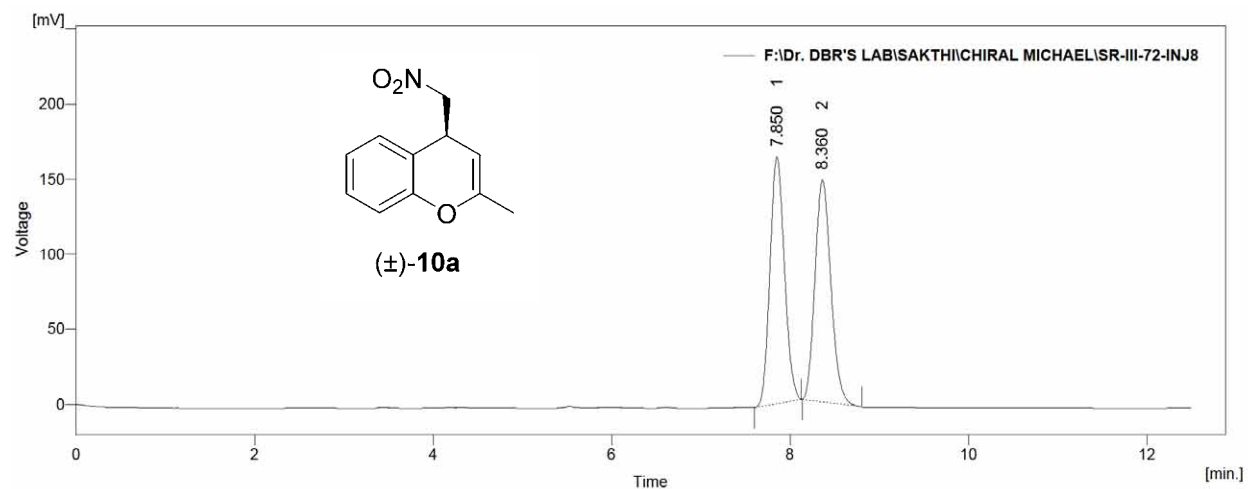

Daicel Chiralcel OD-H, Hexane/i-PrOH = 97:3, Flow Rate 1.0 mL/min, 254 nm.

Result Table (Uncal - F:\Dr. DBR'S LAB\SAKTHI\CHIRAL MICHAEL\SR-III-72-INJ8)

|   | Reten. Time [min] | Area [mV.s] | Height [mV] | Area [%] | Height [%] | W05 [min] |
|---|-------------------|-------------|-------------|----------|------------|-----------|
| 1 | 7.850             | 1228.327    | 109.324     | 50.2     | 52.6       | 0.18      |
| 2 | 8.360             | 1218.691    | 98.350      | 49.8     | 47.4       | 0.19      |
|   | Total             | 2447.018    | 207.674     | 100.0    | 100.0      |           |

CHIRAL **10a** (81% ee):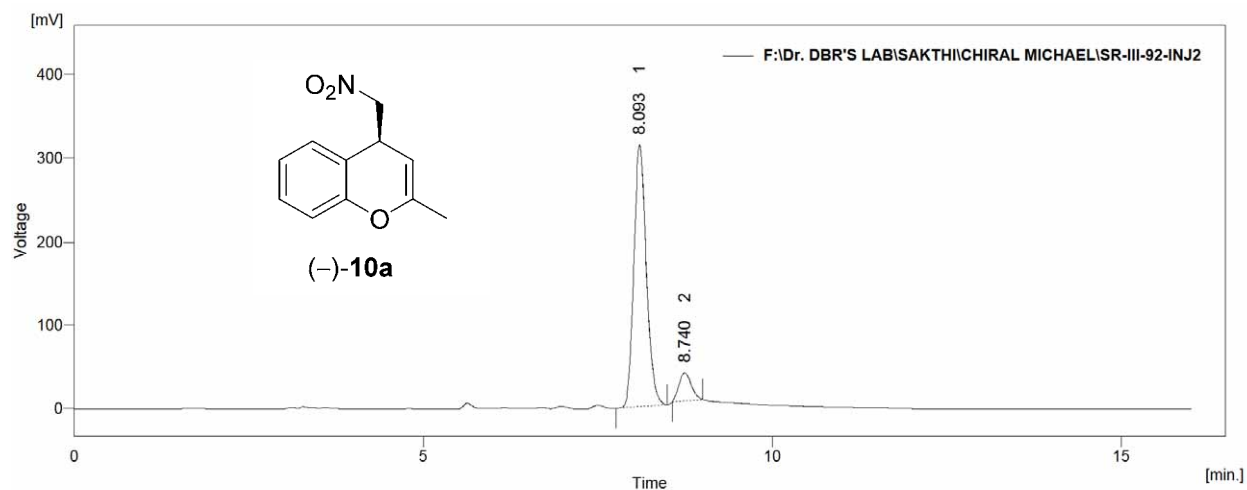

Daicel Chiralcel OD-H, Hexane/i-PrOH = 97:3, Flow Rate 1.0 mL/min, 254 nm.

Result Table (Uncal - F:\Dr. DBR'S LAB\SAKTHI\CHIRAL MICHAEL\SR-III-92-INJ2)

|   | Reten. Time [min] | Area [mV.s] | Height [mV] | Area [%] | Height [%] | W05 [min] |
|---|-------------------|-------------|-------------|----------|------------|-----------|
| 1 | 8.093             | 2595.290    | 208.697     | 90.5     | 90.3       | 0.19      |
| 2 | 8.740             | 273.255     | 22.291      | 9.5      | 9.7        | 0.20      |
|   | Total             | 2868.544    | 230.988     | 100.0    | 100.0      |           |

RACEMIC **12a**: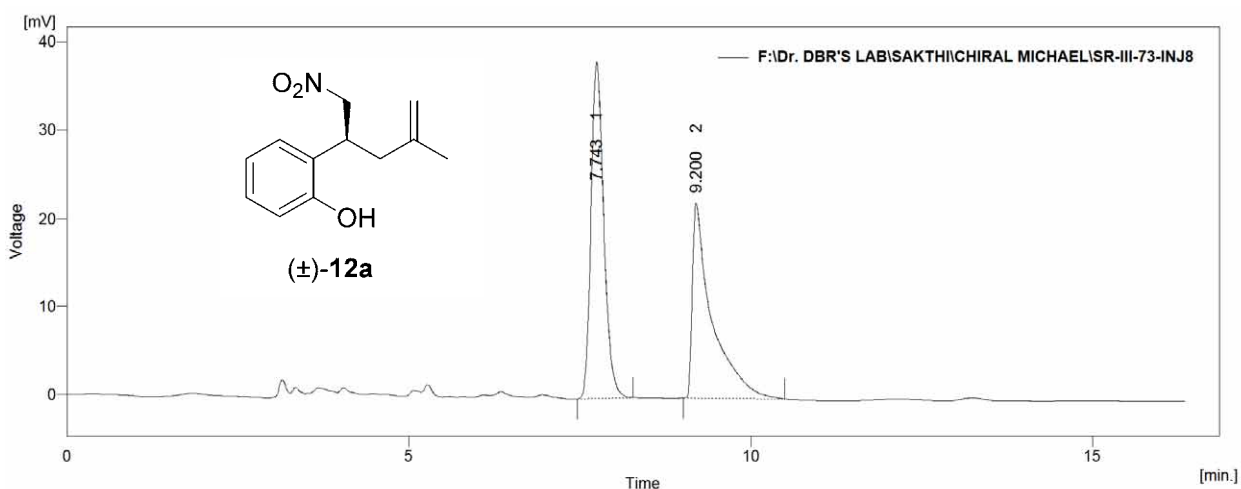Daicel Chiralpak AS-H, Hexane/*i*-PrOH = 94:6, Flow Rate 0.8 mL/min, 254 nm.

Result Table (Uncal - F:\Dr. DBR'S LAB\SAKTHI\CHIRAL MICHAEL\SR-III-73-INJ8)

|   | Reten. Time [min] | Area [mV.s] | Height [mV] | Area [%] | Height [%] | W05 [min] |
|---|-------------------|-------------|-------------|----------|------------|-----------|
| 1 | 7.743             | 328.404     | 25.456      | 52.9     | 63.3       | 0.20      |
| 2 | 9.200             | 292.699     | 14.763      | 47.1     | 36.7       | 0.23      |
|   | Total             | 621.103     | 40.219      | 100.0    | 100.0      |           |

CHIRAL **12a** (82% ee):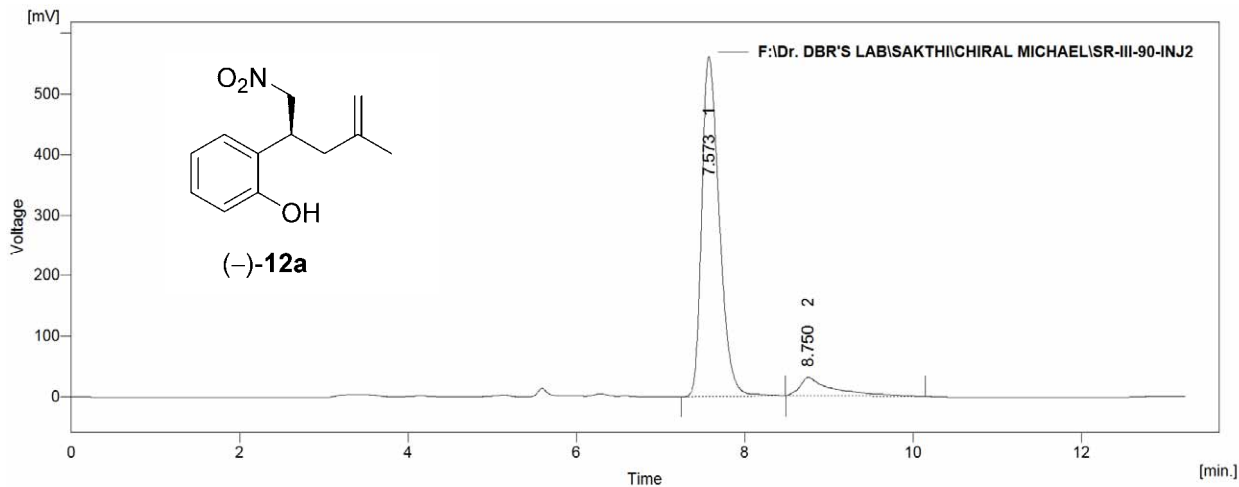Daicel Chiralpak AS-H, Hexane/*i*-PrOH = 94:6, Flow Rate 0.8 mL/min, 254 nm.

Result Table (Uncal - F:\Dr. DBR'S LAB\SAKTHI\CHIRAL MICHAEL\SR-III-90-INJ2)

|   | Reten. Time [min] | Area [mV.s] | Height [mV] | Area [%] | Height [%] | W05 [min] |
|---|-------------------|-------------|-------------|----------|------------|-----------|
| 1 | 7.573             | 5409.210    | 373.695     | 90.9     | 94.8       | 0.22      |
| 2 | 8.750             | 543.297     | 20.546      | 9.1      | 5.2        | 0.30      |
|   | Total             | 5952.507    | 394.242     | 100.0    | 100.0      |           |

**RACEMIC 13a:**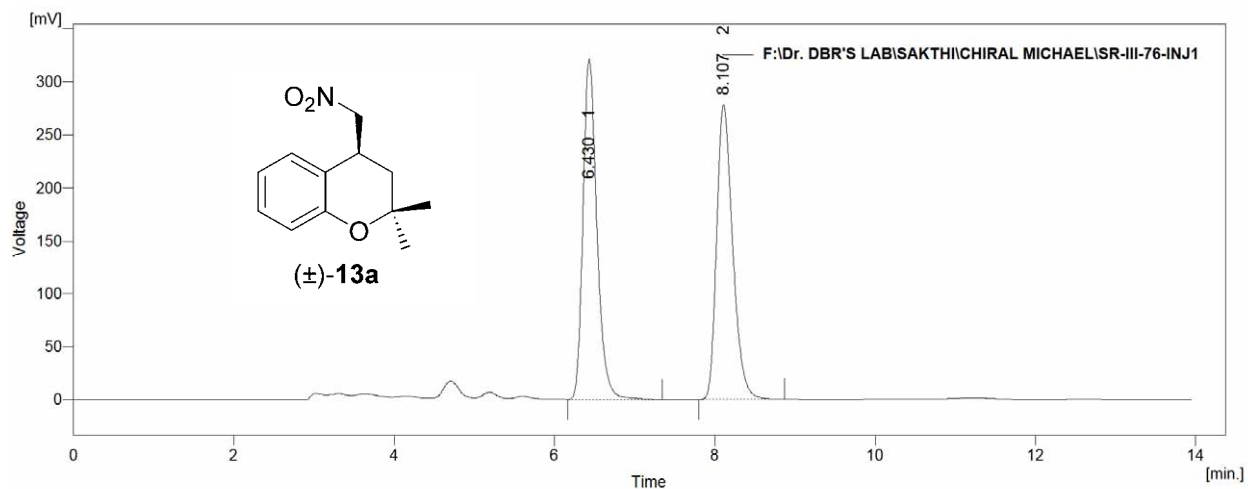

Daicel Chiralcel OD-H, Hexane/i-PrOH = 90:10, Flow Rate 1.0 mL/min, 254 nm.

Result Table (Uncal - F:\Dr. DBR'S LAB\SAKTHI\CHIRAL MICHAEL\SR-III-76-INJ1)

|   | Reten. Time [min] | Area [mV.s] | Height [mV] | Area [%] | Height [%] | W05 [min] |
|---|-------------------|-------------|-------------|----------|------------|-----------|
| 1 | 6.430             | 2568.866    | 214.114     | 50.0     | 53.6       | 0.18      |
| 2 | 8.107             | 2572.321    | 185.233     | 50.0     | 46.4       | 0.21      |
|   | Total             | 5141.187    | 399.347     | 100.0    | 100.0      |           |

**CHIRAL 13a (81% ee):**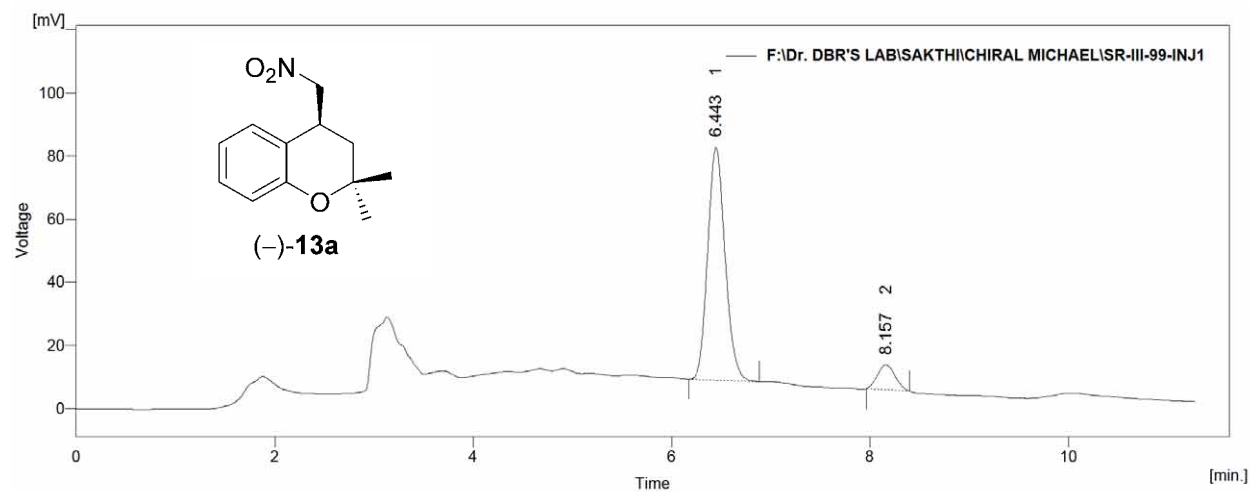

Daicel Chiralcel OD-H, Hexane/i-PrOH = 90:10, Flow Rate 1.0 mL/min, 254 nm.

Result Table (Uncal - F:\Dr. DBR'S LAB\SAKTHI\CHIRAL MICHAEL\SR-III-99-INJ1)

|   | Reten. Time [min] | Area [mV.s] | Height [mV] | Area [%] | Height [%] | W05 [min] |
|---|-------------------|-------------|-------------|----------|------------|-----------|
| 1 | 6.443             | 598.692     | 49.135      | 90.4     | 90.5       | 0.19      |
| 2 | 8.157             | 63.913      | 5.182       | 9.6      | 9.5        | 0.20      |
|   | Total             | 662.606     | 54.317      | 100.0    | 100.0      |           |

RACEMIC **15aa**: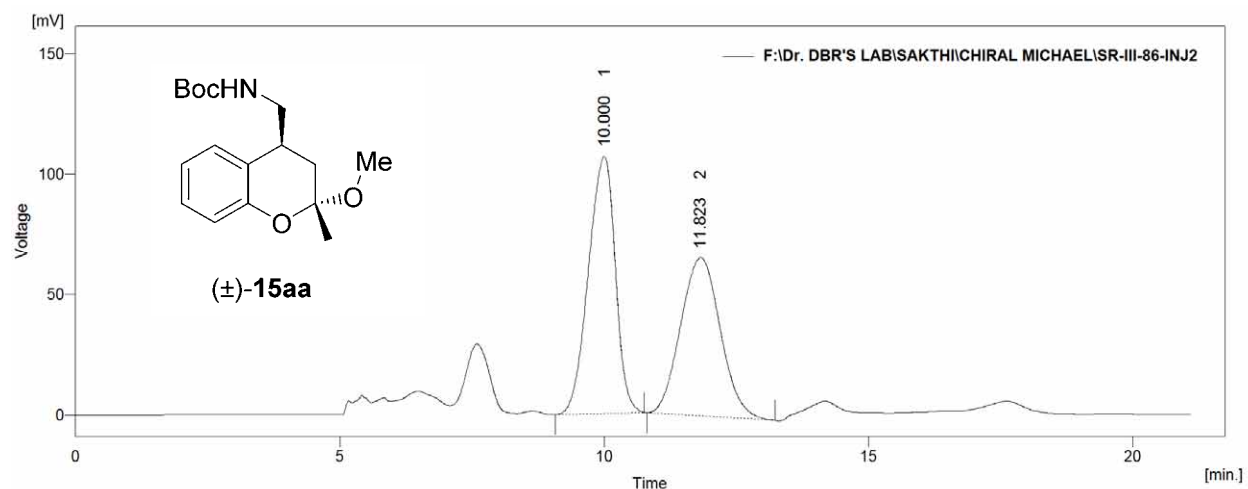

Daicel Chiralcel OD-H, Hexane/*i*-PrOH = 94:6, Flow Rate 0.6 mL/min, 254 nm.

Result Table (Uncal - F:\Dr. DBR'S LAB\SAKTHI\CHIRAL MICHAEL\SR-III-86-INJ2)

|   | Reten. Time [min] | Area [mV.s] | Height [mV] | Area [%] | Height [%] | W05 [min] |
|---|-------------------|-------------|-------------|----------|------------|-----------|
| 1 | 10.000            | 2514.574    | 71.070      | 52.4     | 61.9       | 0.56      |
| 2 | 11.823            | 2280.239    | 43.704      | 47.6     | 38.1       | 0.82      |
|   | Total             | 4794.813    | 114.774     | 100.0    | 100.0      |           |

CHIRAL **15aa** (81% ee):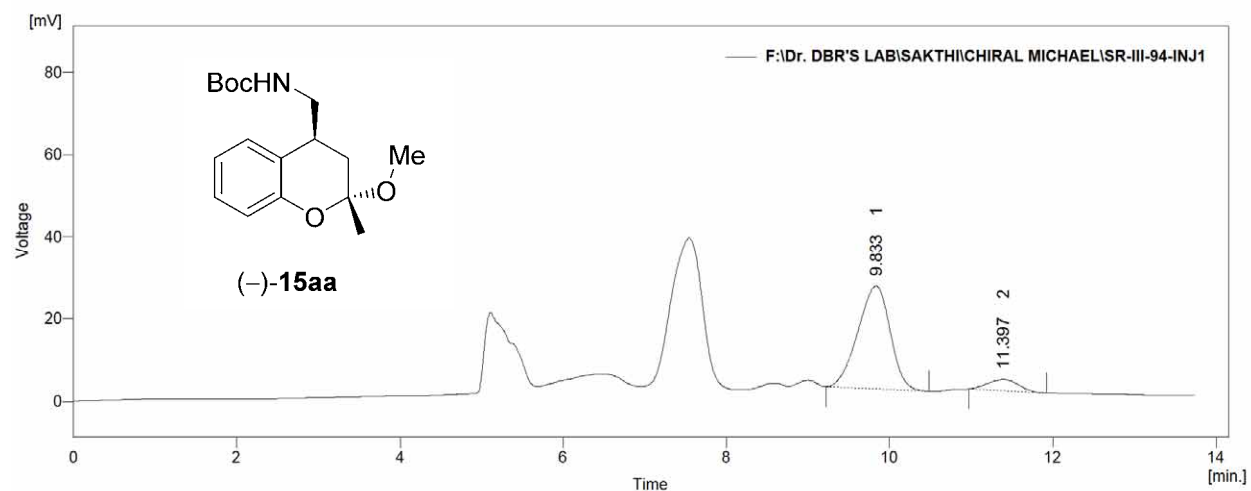

Daicel Chiralcel OD-H, Hexane/*i*-PrOH = 94:6, Flow Rate 0.6 mL/min, 254 nm.

Result Table (Uncal - F:\Dr. DBR'S LAB\SAKTHI\CHIRAL MICHAEL\SR-III-94-INJ1)

|  | Reten. Time | Area | Height | Area | Height | W05 |
|--|-------------|------|--------|------|--------|-----|
|--|-------------|------|--------|------|--------|-----|

CHIRAL (-)-**8aa** (25% ee):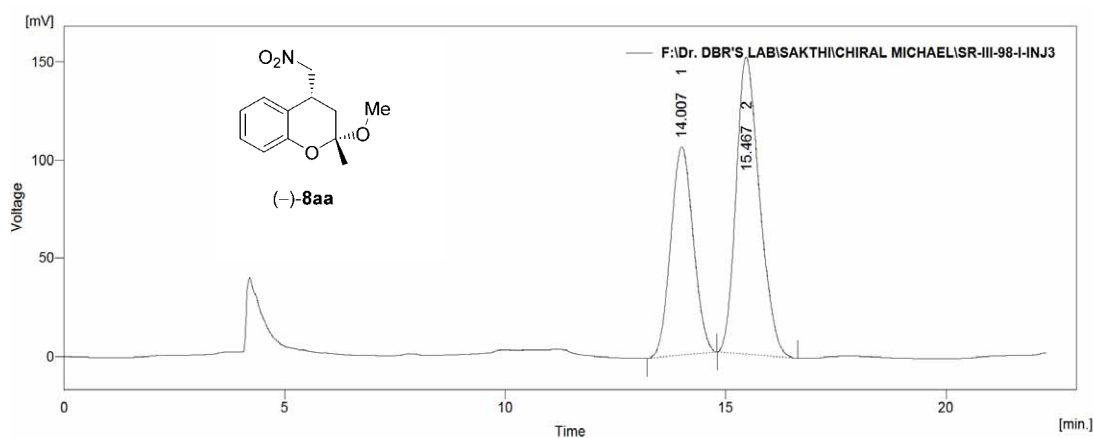

Daicel chiralcel OD-H, Hexane/*i*-PrOH = 99:1, Flow Rate 0.8 mL/min, 254 nm.

Result Table (Uncal - F:\Dr. DBR'S LAB\SAKTHI\CHIRAL MICHAEL\SR-III-98-I-INJ4)

|   | Reten. Time [min] | Area [mV.s] | Height [mV] | Area [%] | Height [%] | W05 [min] |
|---|-------------------|-------------|-------------|----------|------------|-----------|
| 1 | 14.007            | 2236.190    | 67.269      | 37.5     | 40.0       | 0.54      |
| 2 | 15.467            | 3727.687    | 100.838     | 62.5     | 60.0       | 0.57      |
|   | Total             | 5963.876    | 168.107     | 100.0    | 100.0      |           |

CHIRAL (+)-**9aa** (21% ee):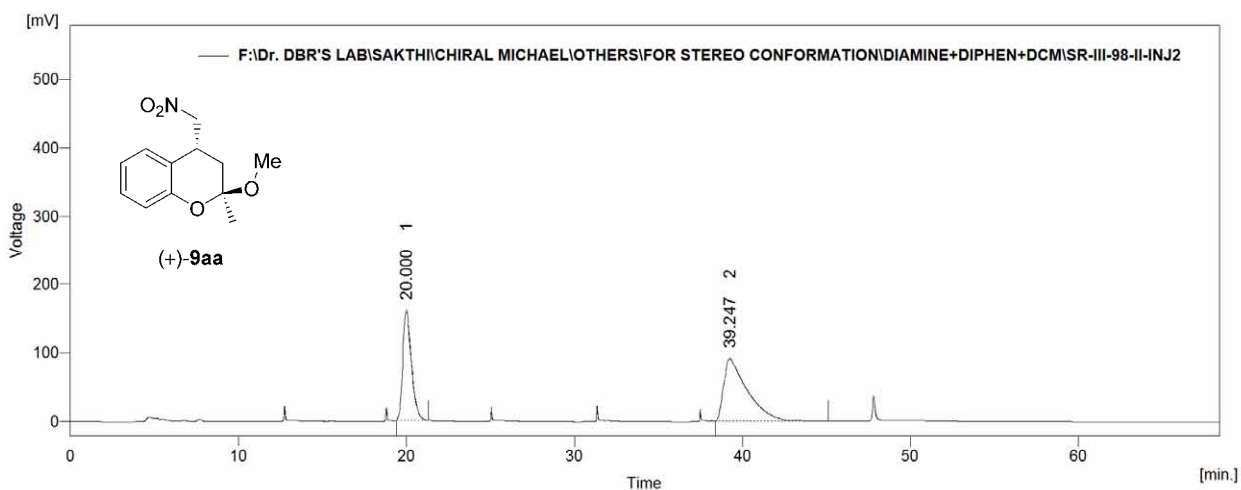

Daicel chiralcel OD-H, Hexane/*i*-PrOH = 99:1, Flow Rate 0.8 mL/min, 254 nm.

**RACEMIC 11ab:**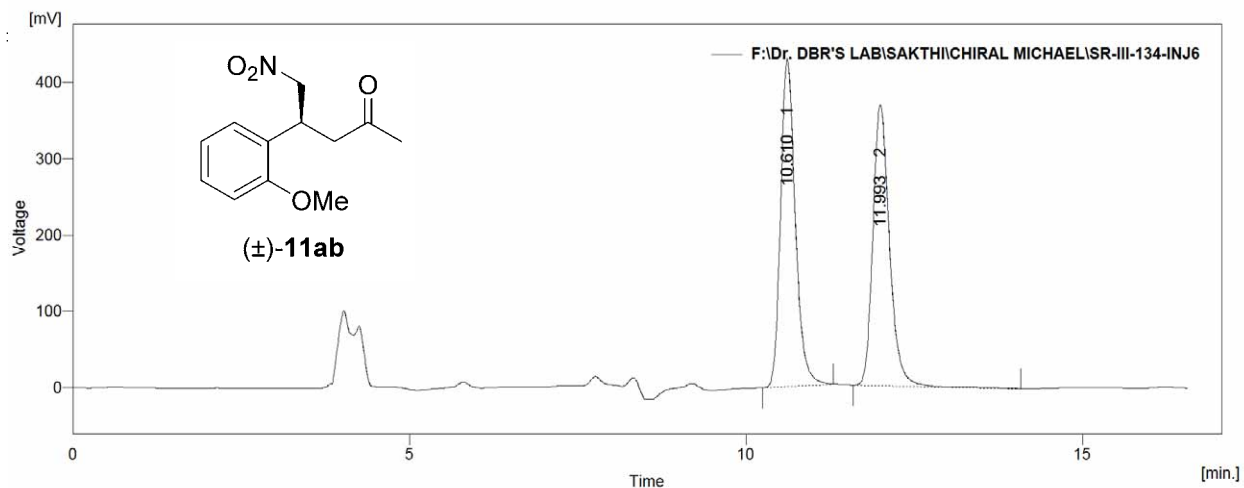

Daicel chiralpak AS-H, Hexane/i-PrOH = 60:40, Flow Rate 1.0 mL/min, 210 nm.

Result Table (Uncal - F:\Dr. DBR'S LAB\SAKTHI\CHIRAL MICHAEL\SR-III-134-INJ6)

|   | Reten. Time [min] | Area [mV.s] | Height [mV] | Area [%] | Height [%] | W05 [min] |
|---|-------------------|-------------|-------------|----------|------------|-----------|
| 1 | 10.610            | 4339.270    | 286.476     | 50.9     | 53.9       | 0.23      |
| 2 | 11.993            | 4191.352    | 245.307     | 49.1     | 46.1       | 0.26      |
|   | Total             | 8530.622    | 531.784     | 100.0    | 100.0      |           |

**CHIRAL 11ab (80% ee):**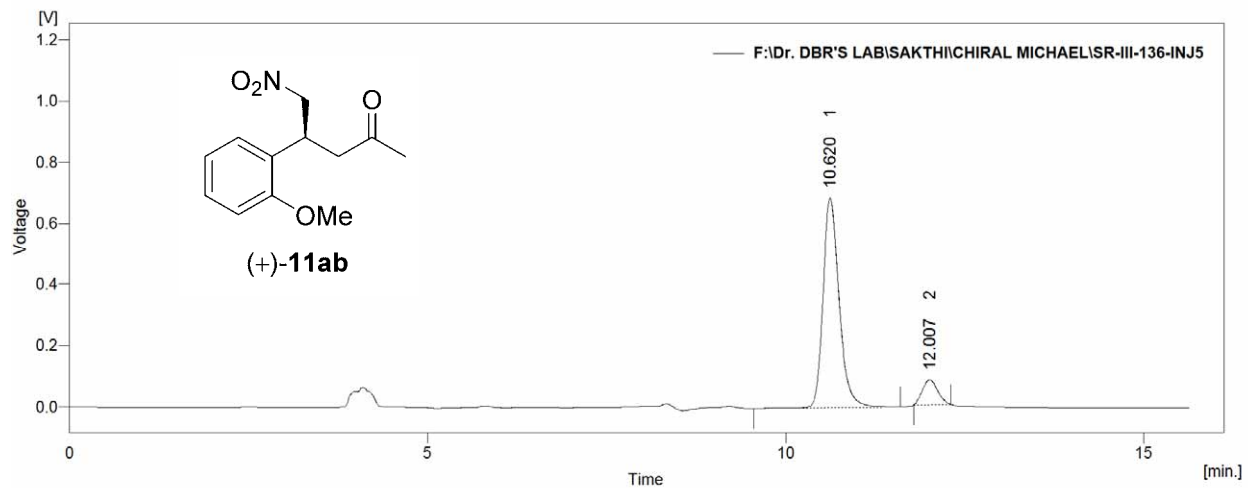

Daicel chiralpak AS-H, Hexane/i-PrOH = 60:40, Flow Rate 1.0 mL/min, 210 nm

## Datablock: dbr11 (Compound 8ba)

---

Bond precision: C-C = 0.0021 Å Wavelength=0.71073

Cell: a=10.7266 (17) b=11.6724 (15) c=11.4931 (13)

alpha=90 beta=93.195 (15) gamma=90

Temperature: 293 K

|                        | Calculated   | Reported     |
|------------------------|--------------|--------------|
| Volume                 | 1436.8 (3)   | 1436.8 (3)   |
| Space group            | P 21/n       | P21/n        |
| Hall group             | -P 2yn       | ?            |
| Moiety formula         | C16 H17 N O4 | ?            |
| Sum formula            | C16 H17 N O4 | C16 H17 N O4 |
| Mr                     | 287.31       | 287.31       |
| Dx, g cm <sup>-3</sup> | 1.328        | 1.328        |
| Z                      | 4            | 4            |
| Mu (mm <sup>-1</sup> ) | 0.096        | 0.096        |

|           |             |             |
|-----------|-------------|-------------|
| F000      | 608.0       | 608.0       |
| F000'     | 608.32      |             |
| h,k,lmax  | 13,14,14    | 13,14,14    |
| Nref      | 2943        | 2939        |
| Tmin,Tmax | 0.977,0.986 | 0.834,1.000 |
| Tmin'     | 0.962       |             |

Correction method= MULTI-SCAN

Data completeness= 0.999      Theta(max)= 26.370

R(reflections)= 0.0499( 2042)      wR2(reflections)= 0.1317( 2939)

S = 1.033      Npar= 192

---

## Datablock dbr11 - ellipsoid plot





Supplementary Material (ESI) for Organic & Biomolecular Chemistry

This journal is (c) The Royal Society of Chemistry 2010

Bond precision: C-C = 0.0019 Å Wavelength=0.71073

Cell: a=11.2657(18) b=6.0004(10) c=19.842(3)

alpha=90 beta=94.626(2) gamma=90

Temperature: 298 K

|                        | Calculated   | Reported     |
|------------------------|--------------|--------------|
| Volume                 | 1336.9(4)    | 1336.9(4)    |
| Space group            | P 21/c       | P2(1)/c      |
| Hall group             | -P 2ybc      | ?            |
| Moiety formula         | C13 H17 N O5 | ?            |
| Sum formula            | C13 H17 N O5 | C13 H17 N O5 |
| Mr                     | 267.28       | 267.28       |
| Dx, g cm <sup>-3</sup> | 1.328        | 1.328        |
| Z                      | 4            | 4            |
| Mu (mm <sup>-1</sup> ) | 0.102        | 0.102        |
| F000                   | 568.0        | 568.0        |
| F000'                  | 568.33       |              |
| h,k,lmax               | 14,7,26      | 14,7,26      |
| Nref                   | 3275         | 3178         |
| Tmin,Tmax              | 0.964,0.975  | 0.960,0.975  |
| Tmin'                  | 0.960        |              |

Correction method= MULTI-SCAN

Data completeness= 0.970 Theta(max)= 28.180

R(reflections)= 0.0558( 2688) wR2(reflections)= 0.1526( 3178)

S = 1.056 Npar= 175

## Datablock dbr77\_m - ellipsoid plot

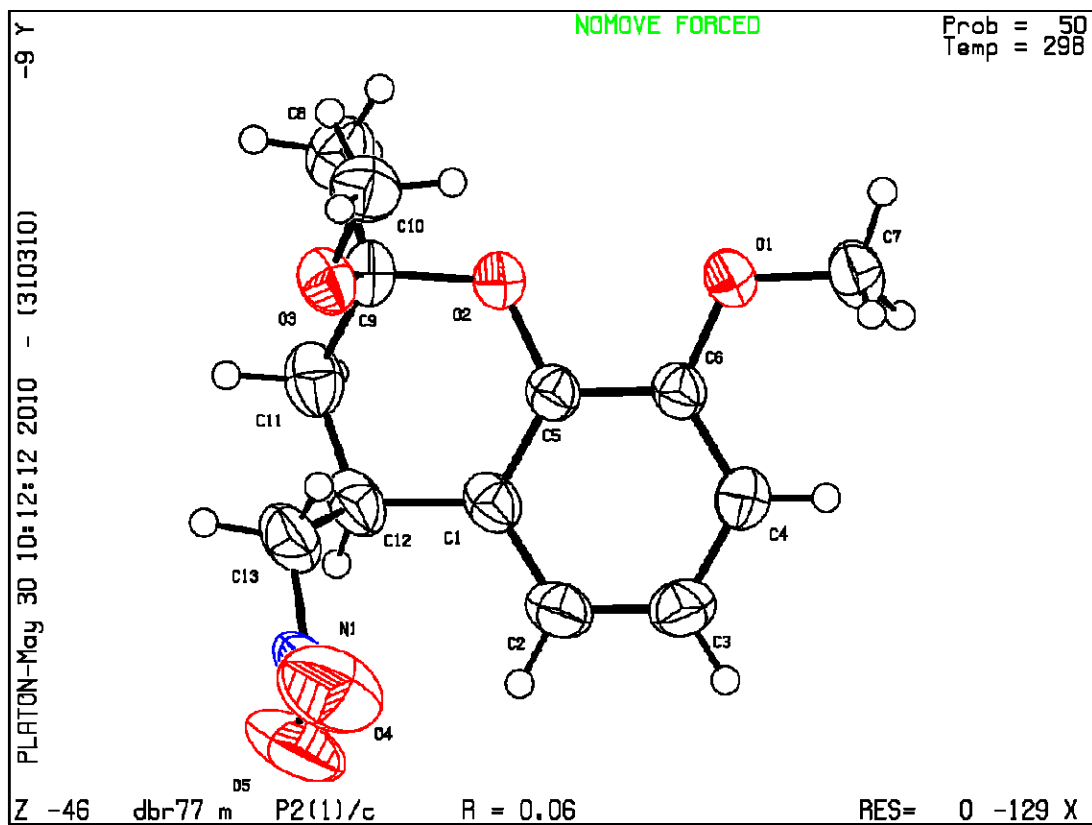

## Datablock: dbr76\_m (Compound 9ha)

---

Bond precision: C-C = 0.0029 Å Wavelength=0.71073

Cell: a=8.850(3) b=6.326(2) c=23.884(9)

alpha=90 beta=95.201(6) gamma=90

Temperature: 298 K

|                        | Calculated   | Reported     |
|------------------------|--------------|--------------|
| Volume                 | 1331.6(8)    | 1331.5(9)    |
| Space group            | P 21/c       | P2(1)/c      |
| Hall group             | -P 2ybc      | ?            |
| Moiety formula         | C13 H17 N O5 | ?            |
| Sum formula            | C13 H17 N O5 | C13 H17 N O5 |
| Mr                     | 267.28       | 267.28       |
| Dx, g cm <sup>-3</sup> | 1.333        | 1.333        |
| Z                      | 4            | 4            |
| Mu (mm <sup>-1</sup> ) | 0.103        | 0.103        |
| F000                   | 568.0        | 568.0        |
| F000'                  | 568.33       |              |
| h, k, lmax             | 11, 8, 31    | 11, 8, 31    |
| Nref                   | 3271         | 3150         |
| Tmin, Tmax             | 0.970, 0.984 | 0.130, 1.000 |
| Tmin'                  | 0.970        |              |

Correction method= MULTI-SCAN

Data completeness= 0.963 Theta(max)= 28.150

R(reflections)= 0.0656( 2629) wR2(reflections)= 0.1493( 3150)

S = 1.181

Npar= 175

## Datablock dbr76\_m - ellipsoid plot

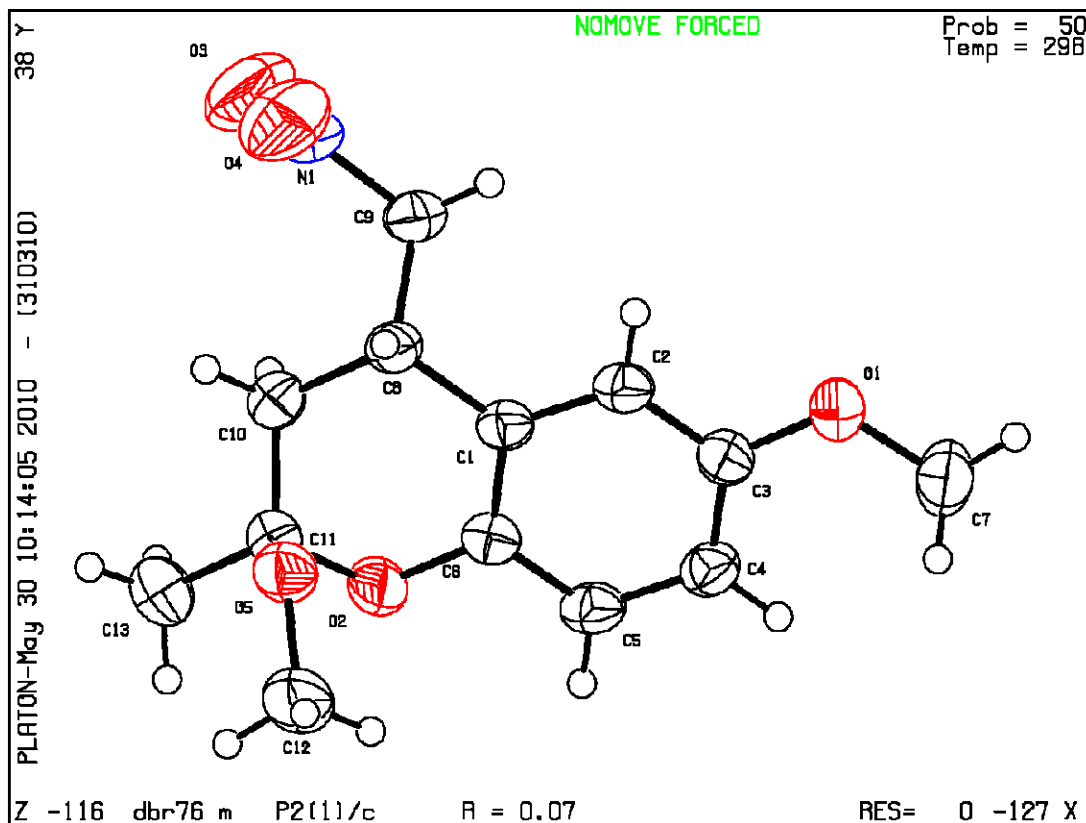

Supplement: c0ob00189a-1.pdf [file c0ob00189a-1.pdf]
