# Supplementary material for: Sequential combination of Michael and acetalization reactions: direct catalytic asymmetric synthesis of functionalized 4-nitromethyl-chromans as drug intermediates
Source: Royal Society of Chemistry journal article supplement (doi:10.1039/c0ob00189a), 2010-01-01
Supplement: c0ob00189a-2.pdf [file c0ob00189a-2.pdf]

# Supporting Information-II

## NMR Spectral Data

### Sequential Combination of Michael and Acetalization Reactions: Direct Catalytic Asymmetric Synthesis of Functionalized 4-Nitromethylchromans as Drug Intermediates

**Dhevalapally B. Ramachary\* and Rajasekar Sakthidevi**

*School of Chemistry, University of Hyderabad, Central University (P.O.),*

*Hyderabad 500 046, India*

[ramsc@uohyd.ernet.in](mailto:ramsc@uohyd.ernet.in)

**Key Note about the NMR plots:** *Due to the Michael $\leftrightarrow$ lactol isomerism in the SMA compounds 4/5/6,  $^1\text{H}$  and  $^{13}\text{C}$  NMR representing the signals of three compounds. The SMA products were found to exist in rapid equilibrium with 1:1:1 ratio of Michael $\leftrightarrow$ cis-lactol $\leftrightarrow$ trans-lactol products in solution ( $\text{CDCl}_3$ ). The equilibrium is very rapid and therefore no pseudo-diastereomers are observed during HPLC analysis.*

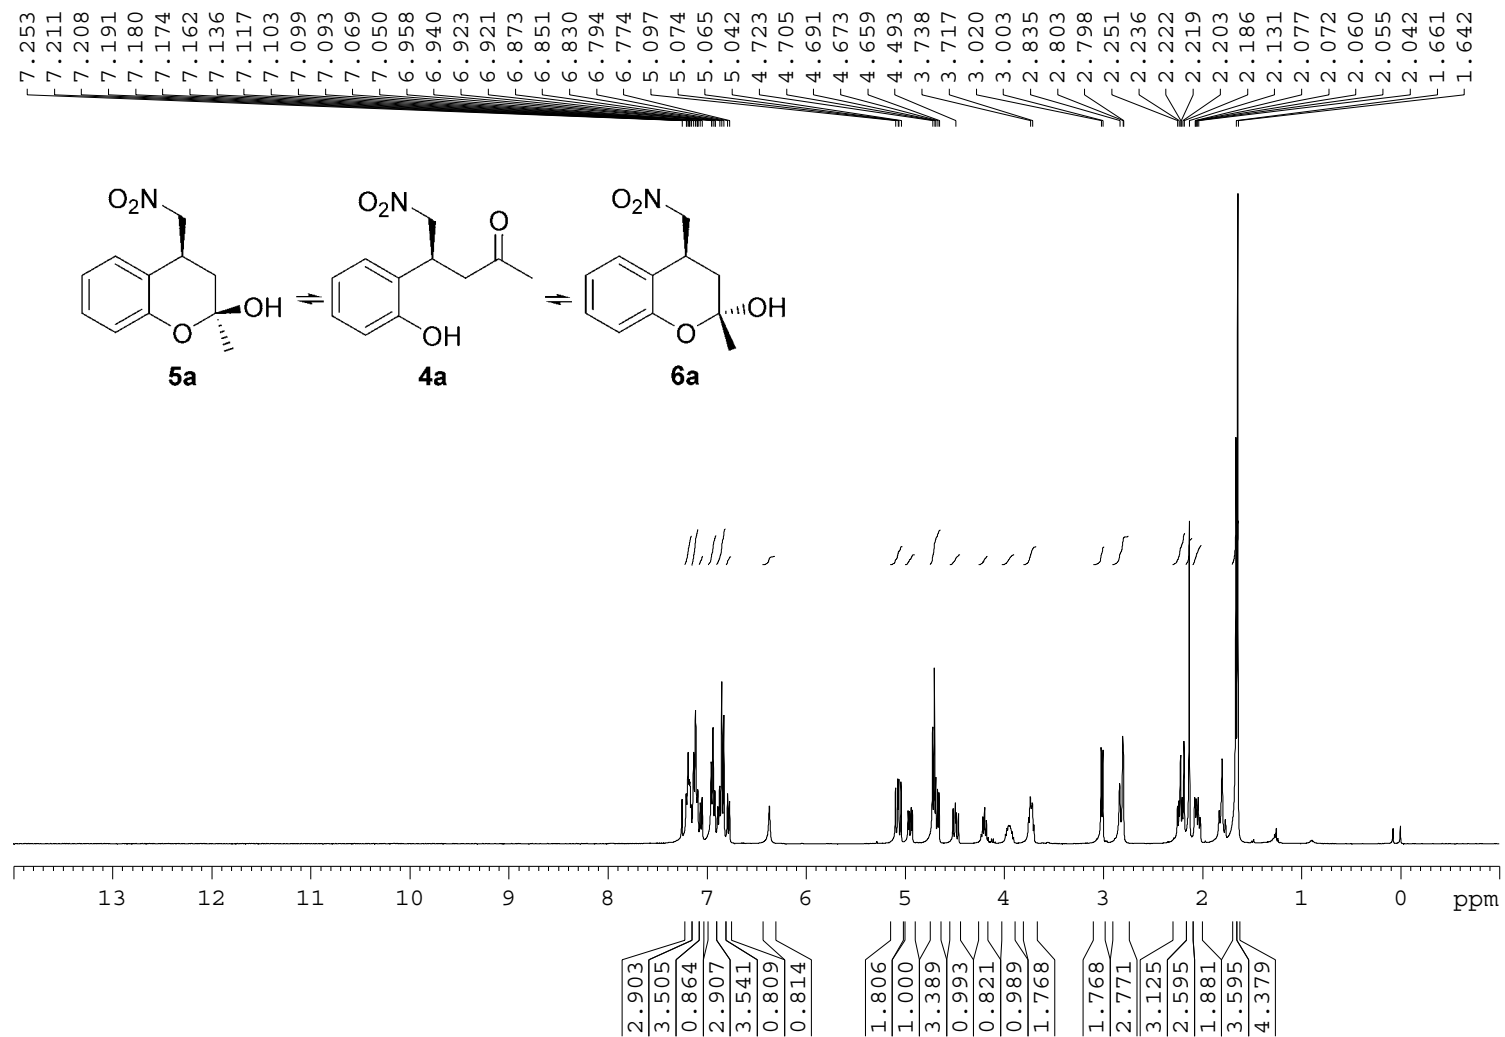

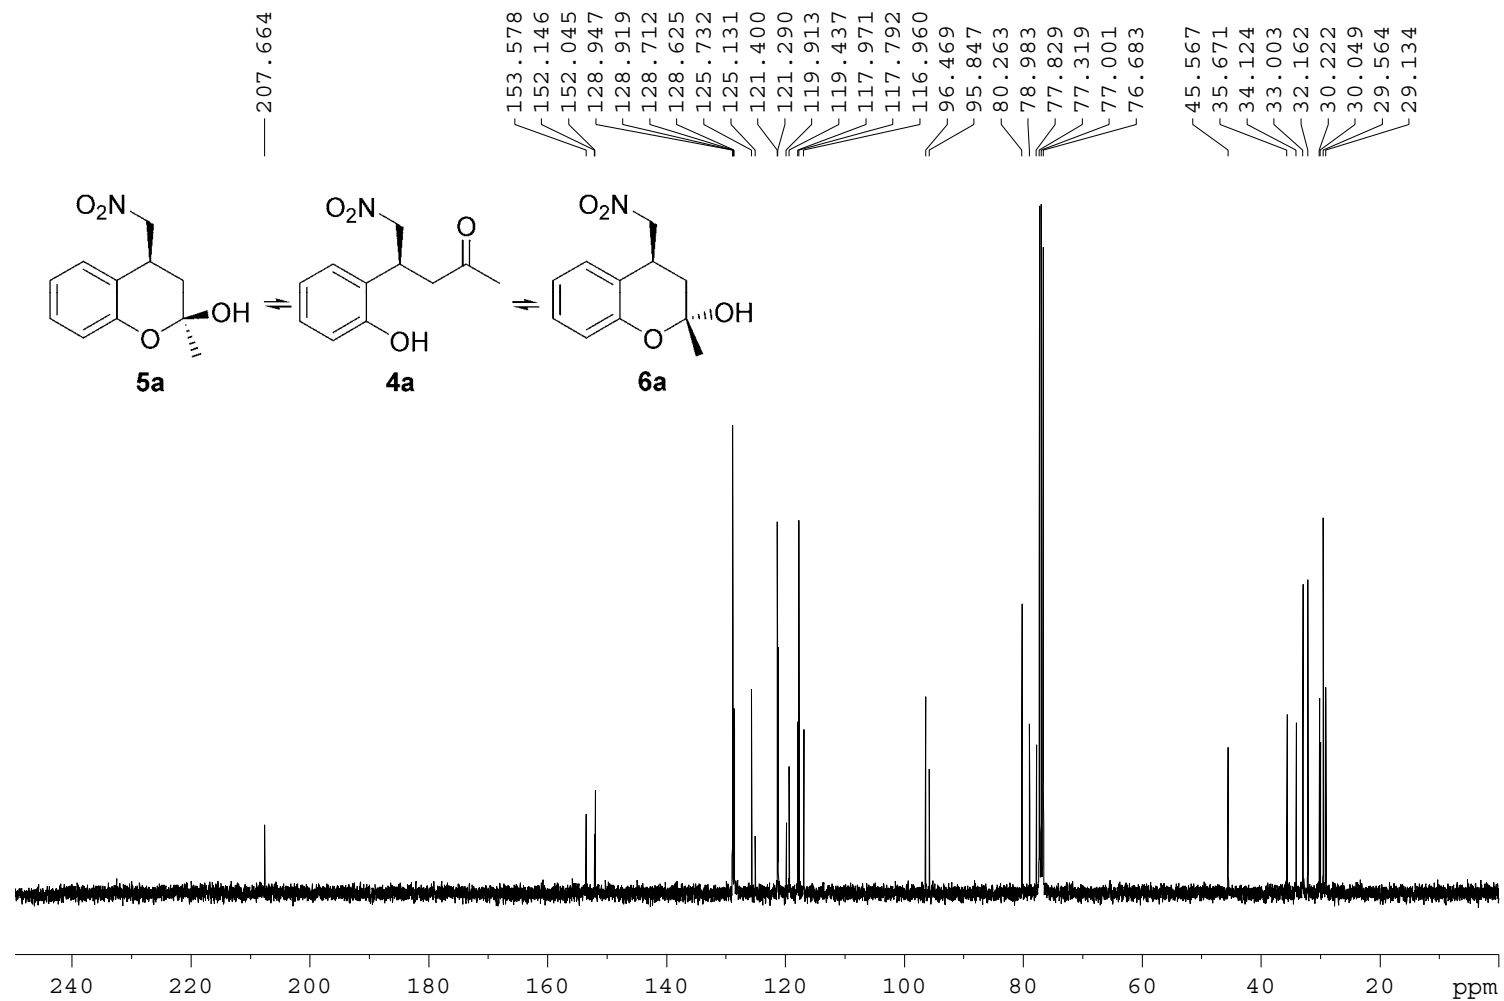

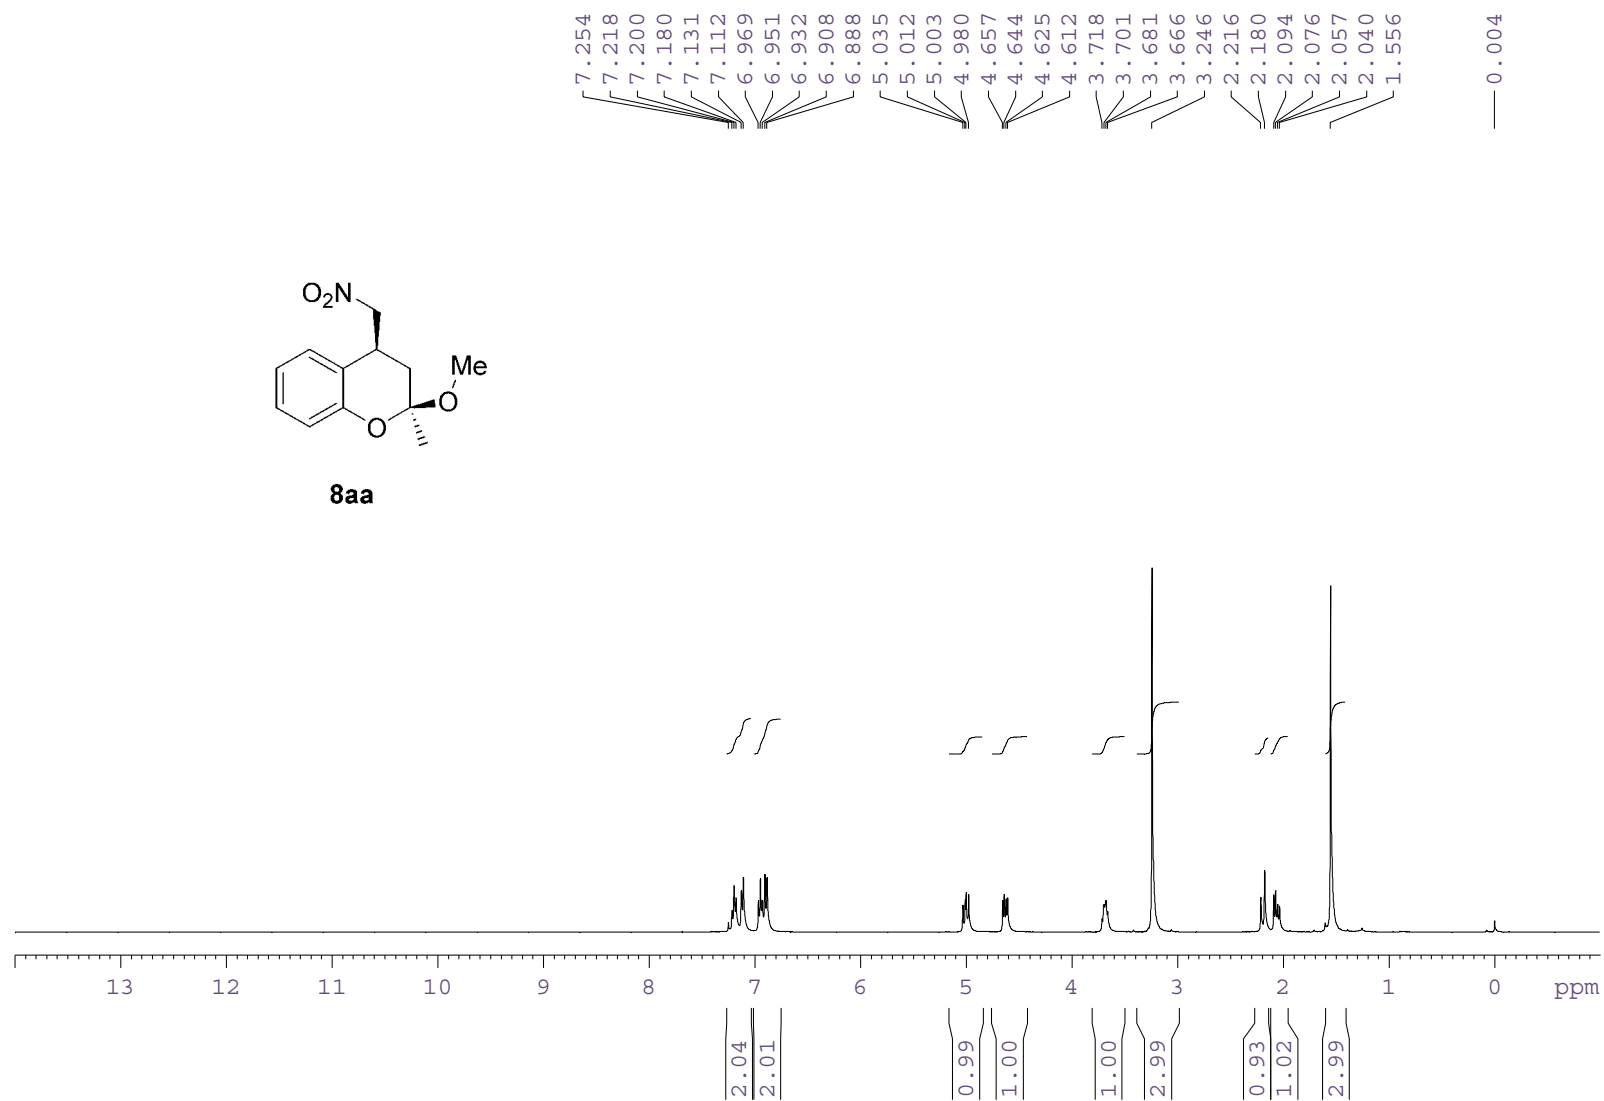

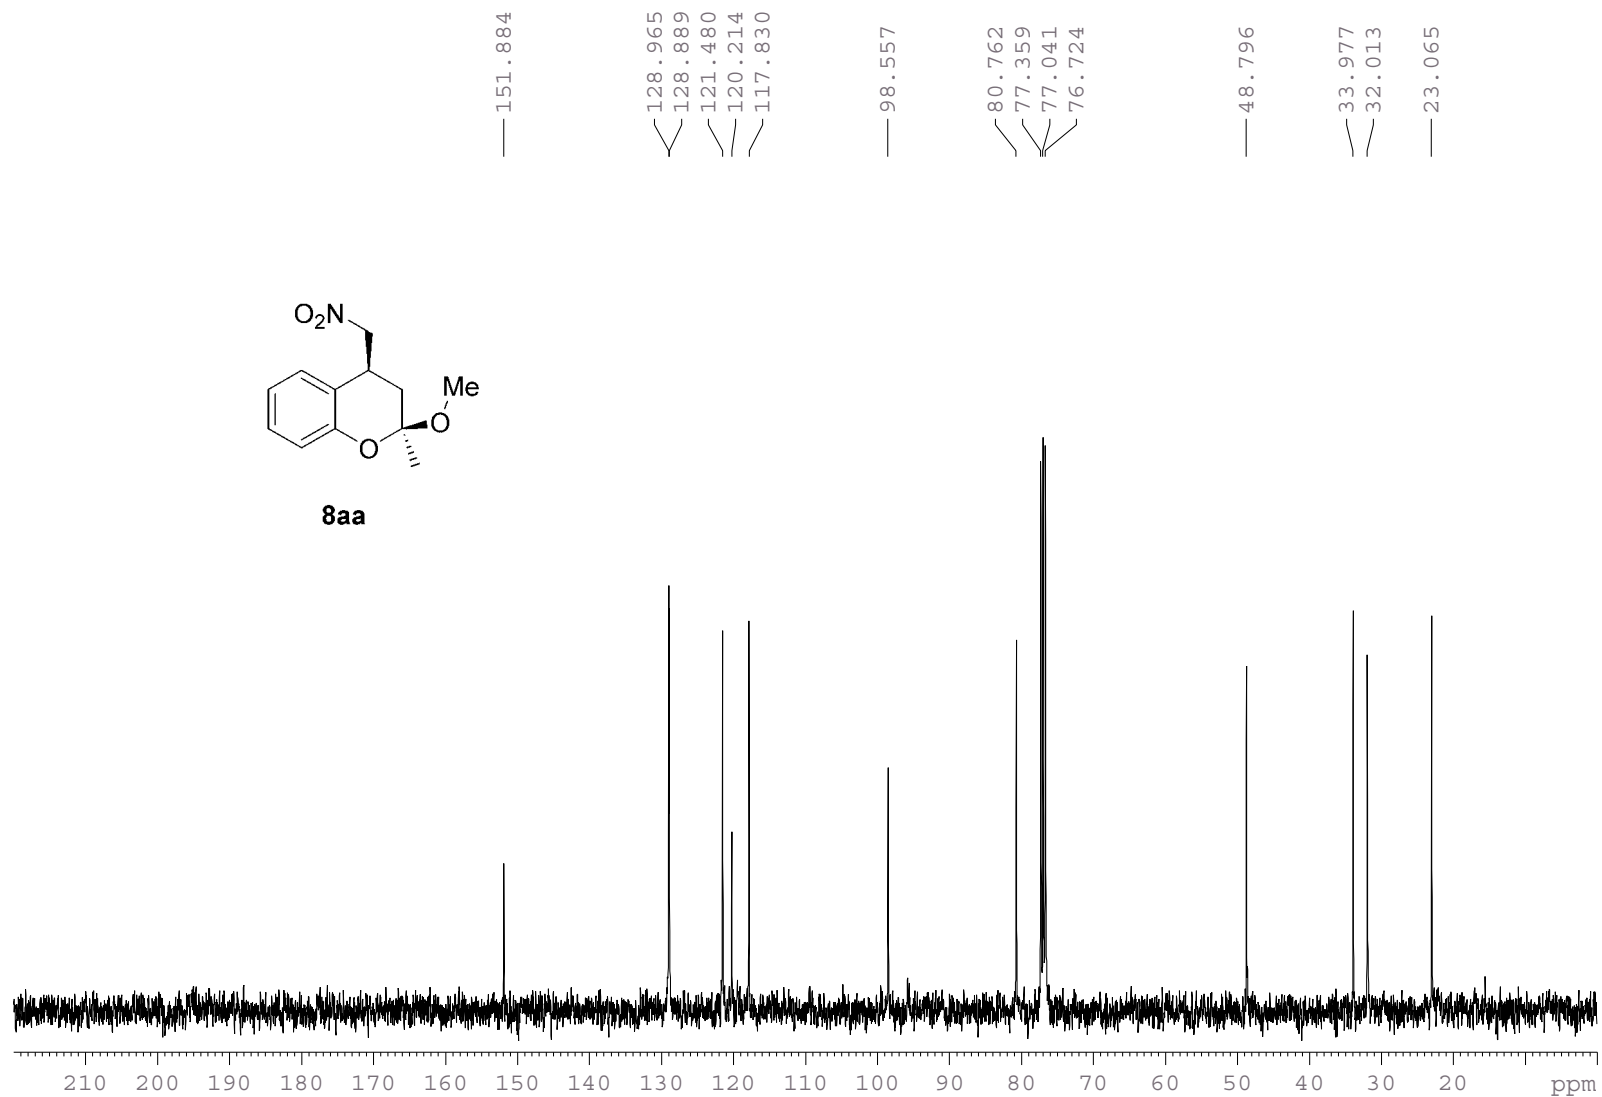

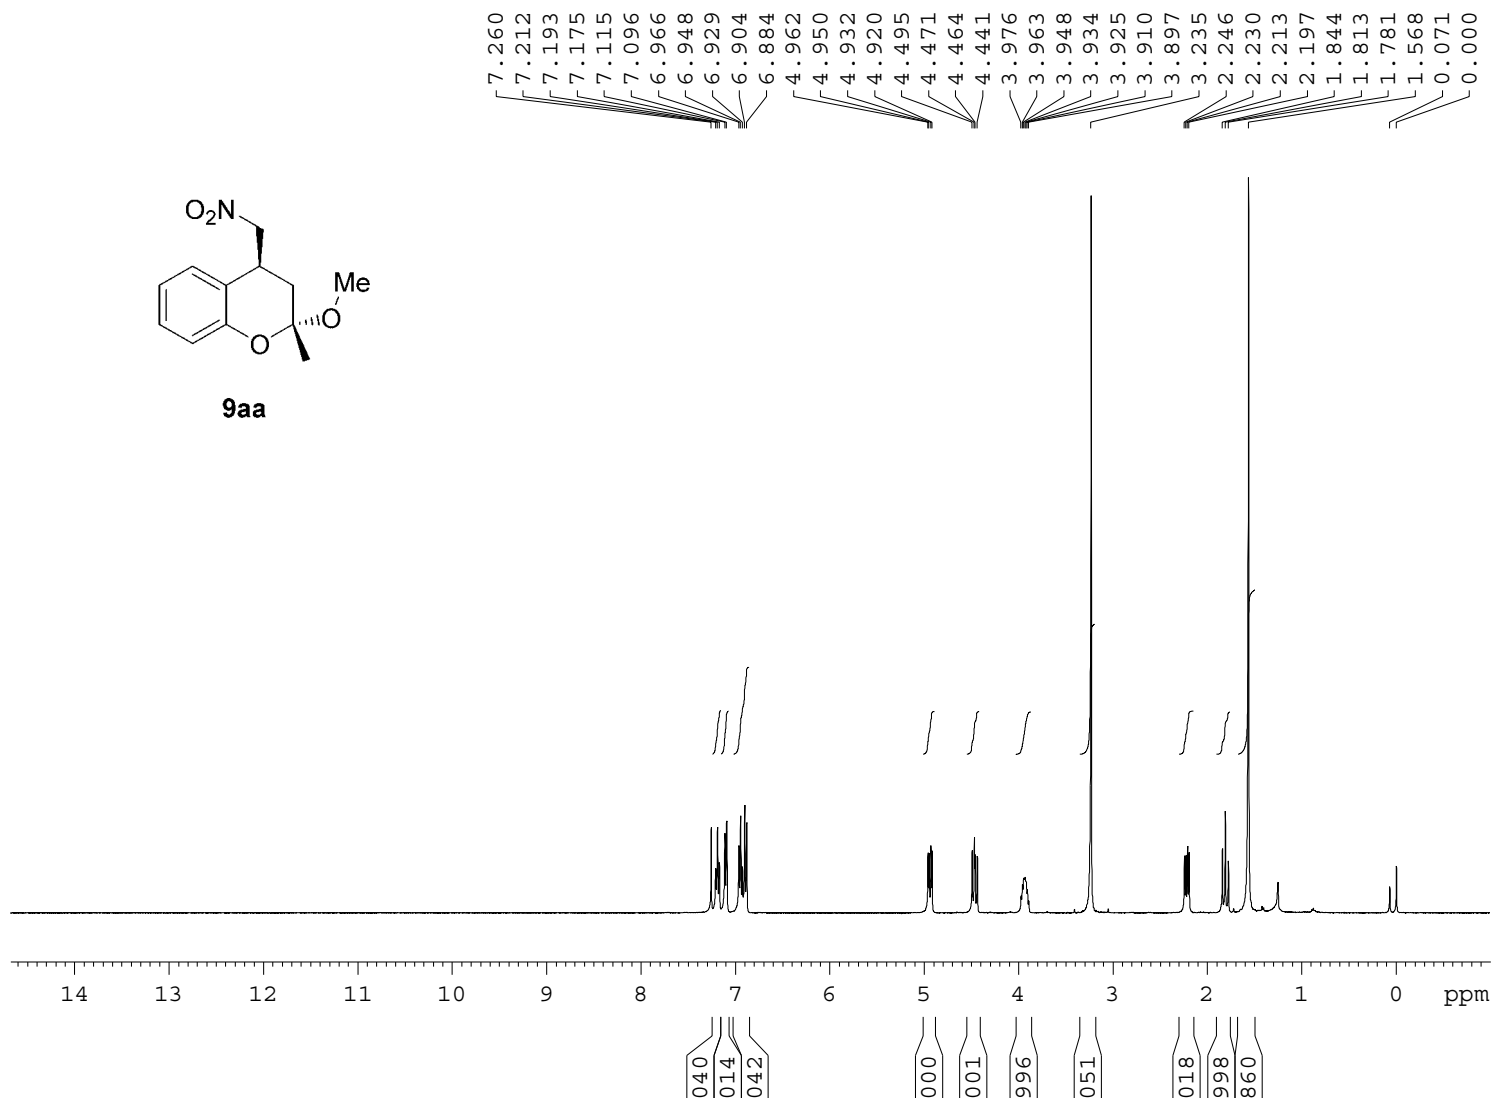

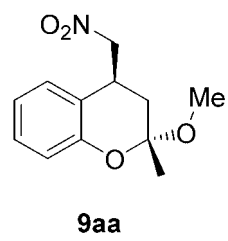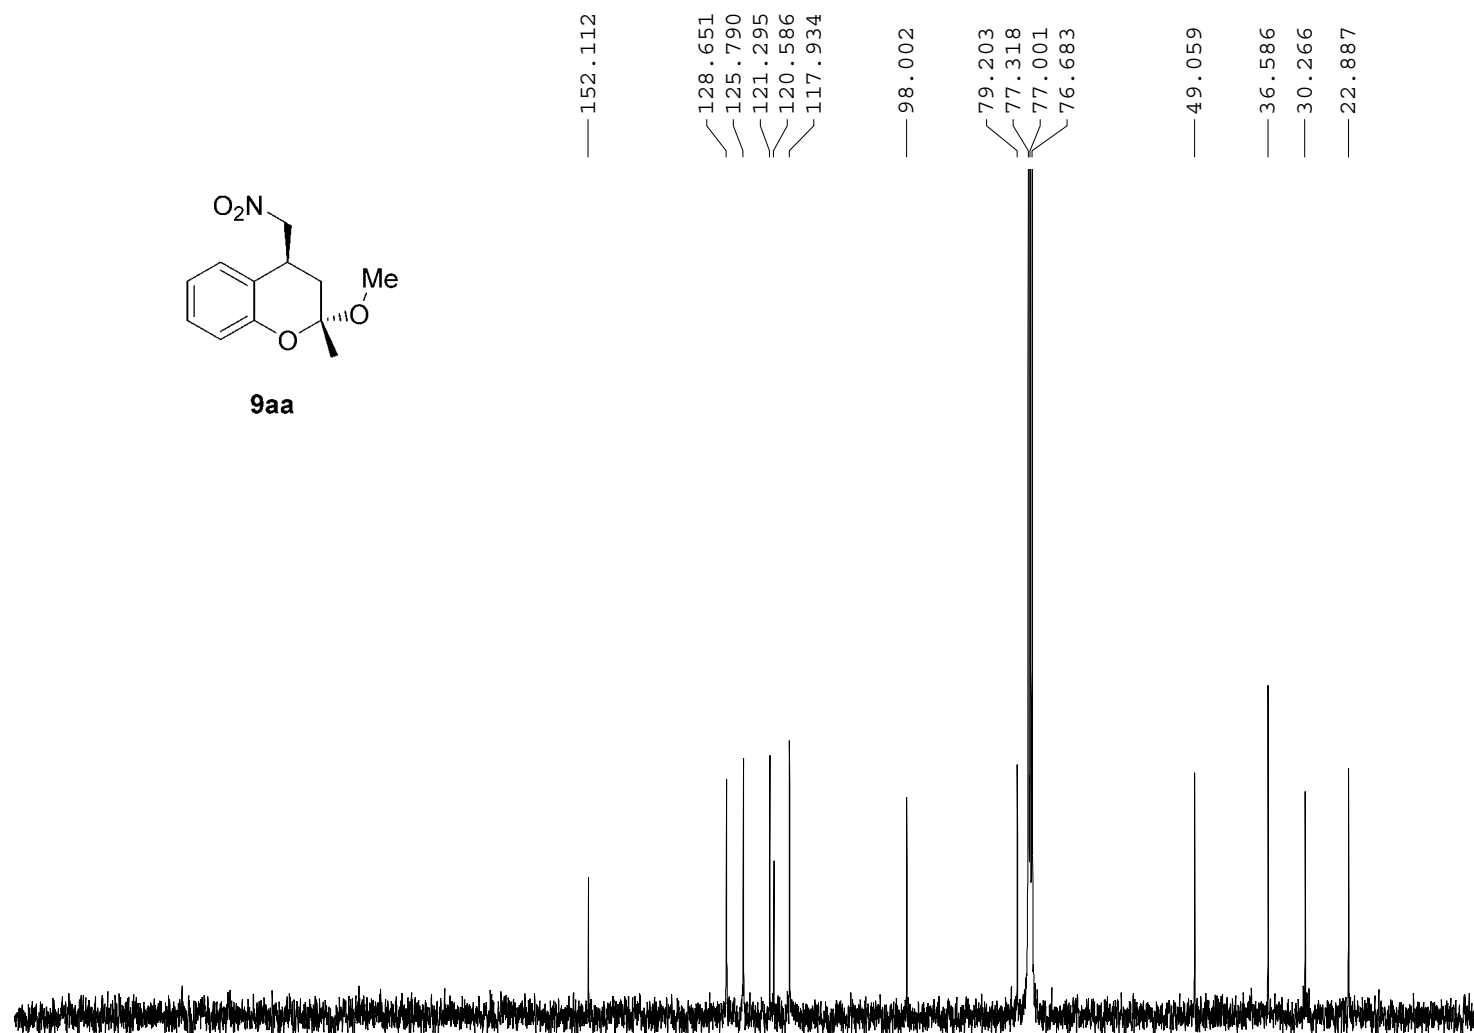

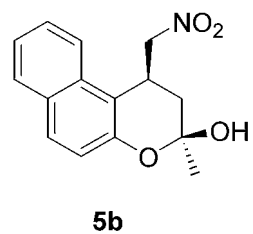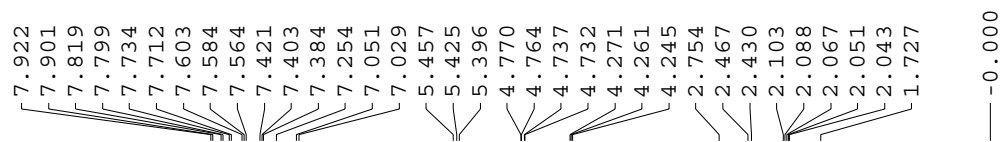



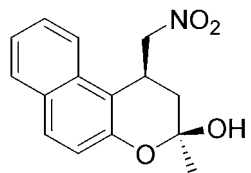

**5b**

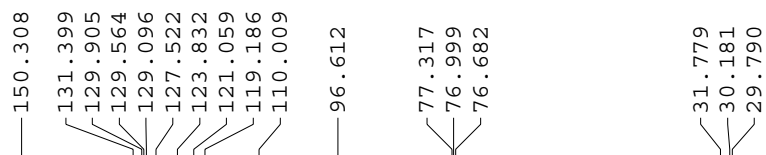

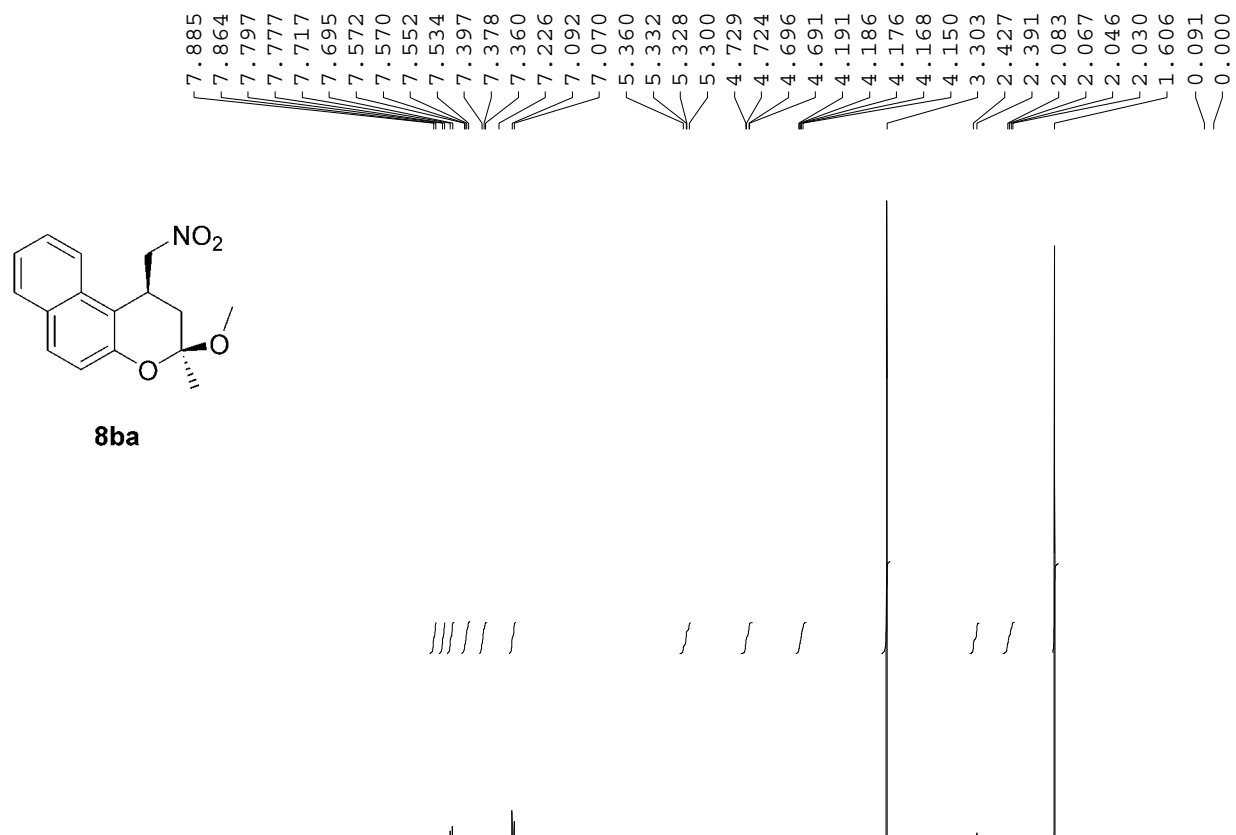

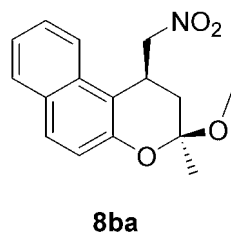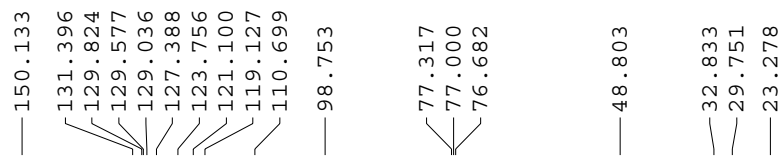

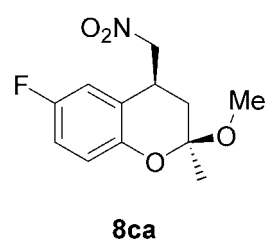

7.264  
6.930  
6.923  
6.908  
6.901  
6.888  
6.881  
6.858  
6.856  
6.846  
6.832  
6.824  
5.013  
4.991  
4.981  
4.958  
4.637  
4.623  
4.604  
4.590  
3.697  
3.680  
3.661  
3.644  
3.228  
2.196  
2.160  
2.074  
2.057  
2.038  
2.020  
1.547  
0.078  
0.000

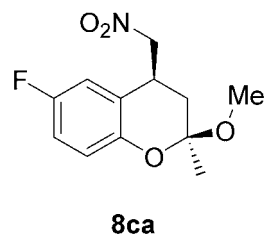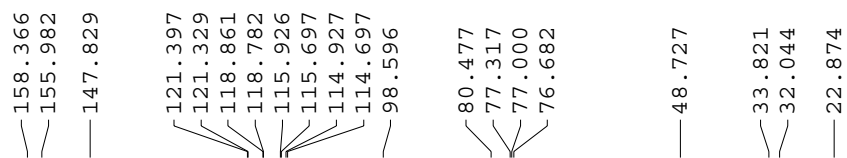

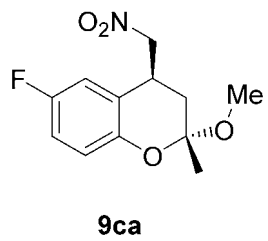

7.262  
6.917  
6.910  
6.894  
6.889  
6.875  
6.869  
6.852  
6.839  
6.830  
6.814  
4.875  
4.863  
4.844  
4.832  
4.503  
4.480  
4.472  
4.449  
3.934  
3.920  
3.904  
3.892  
3.869  
3.855  
3.216  
2.231  
2.216  
2.198  
2.182  
1.824  
1.792  
1.761  
1.555  
0.077  
0.000

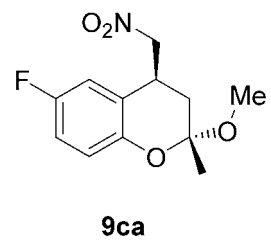

—158.344  
—155.962  
—148.129

—121.778  
—121.710  
—118.922  
—118.842  
—115.523  
—115.295  
—112.440  
—112.203  
—98.111

—78.781  
—77.318  
—77.000  
—76.682

—49.001

—36.199  
—30.452  
—22.711

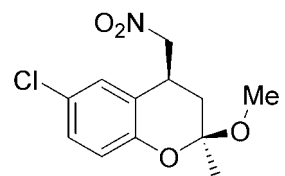

**8da**

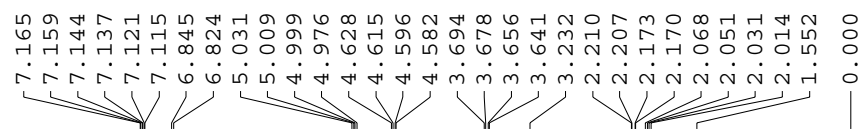



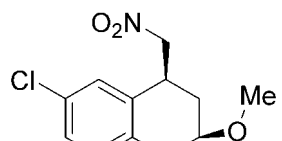

— 150.531

128.944  
128.558  
126.164  
121.865  
119.202

— 98.795

80.374  
77.317  
77.000  
76.682

— 48.811

33.778  
31.809  
— 22.855

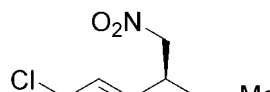

7.263  
7.157  
7.155  
7.151  
7.149  
7.136  
7.134  
7.129  
7.128  
7.091  
7.089  
7.086  
7.083  
6.838  
6.817  
4.907  
4.896  
4.877  
4.865  
4.497  
4.474  
4.466  
4.444  
3.933  
3.918  
3.906  
3.903  
3.898  
3.895  
3.891  
3.888  
3.883  
3.880  
3.867  
3.853  
3.218  
2.233  
2.217  
2.200  
2.184  
1.821  
1.791  
1.789

Supplementary Material (ESI) for Organic & Biomolecular Chemistry

This journal is (c) The Royal Society of Chemistry 2010

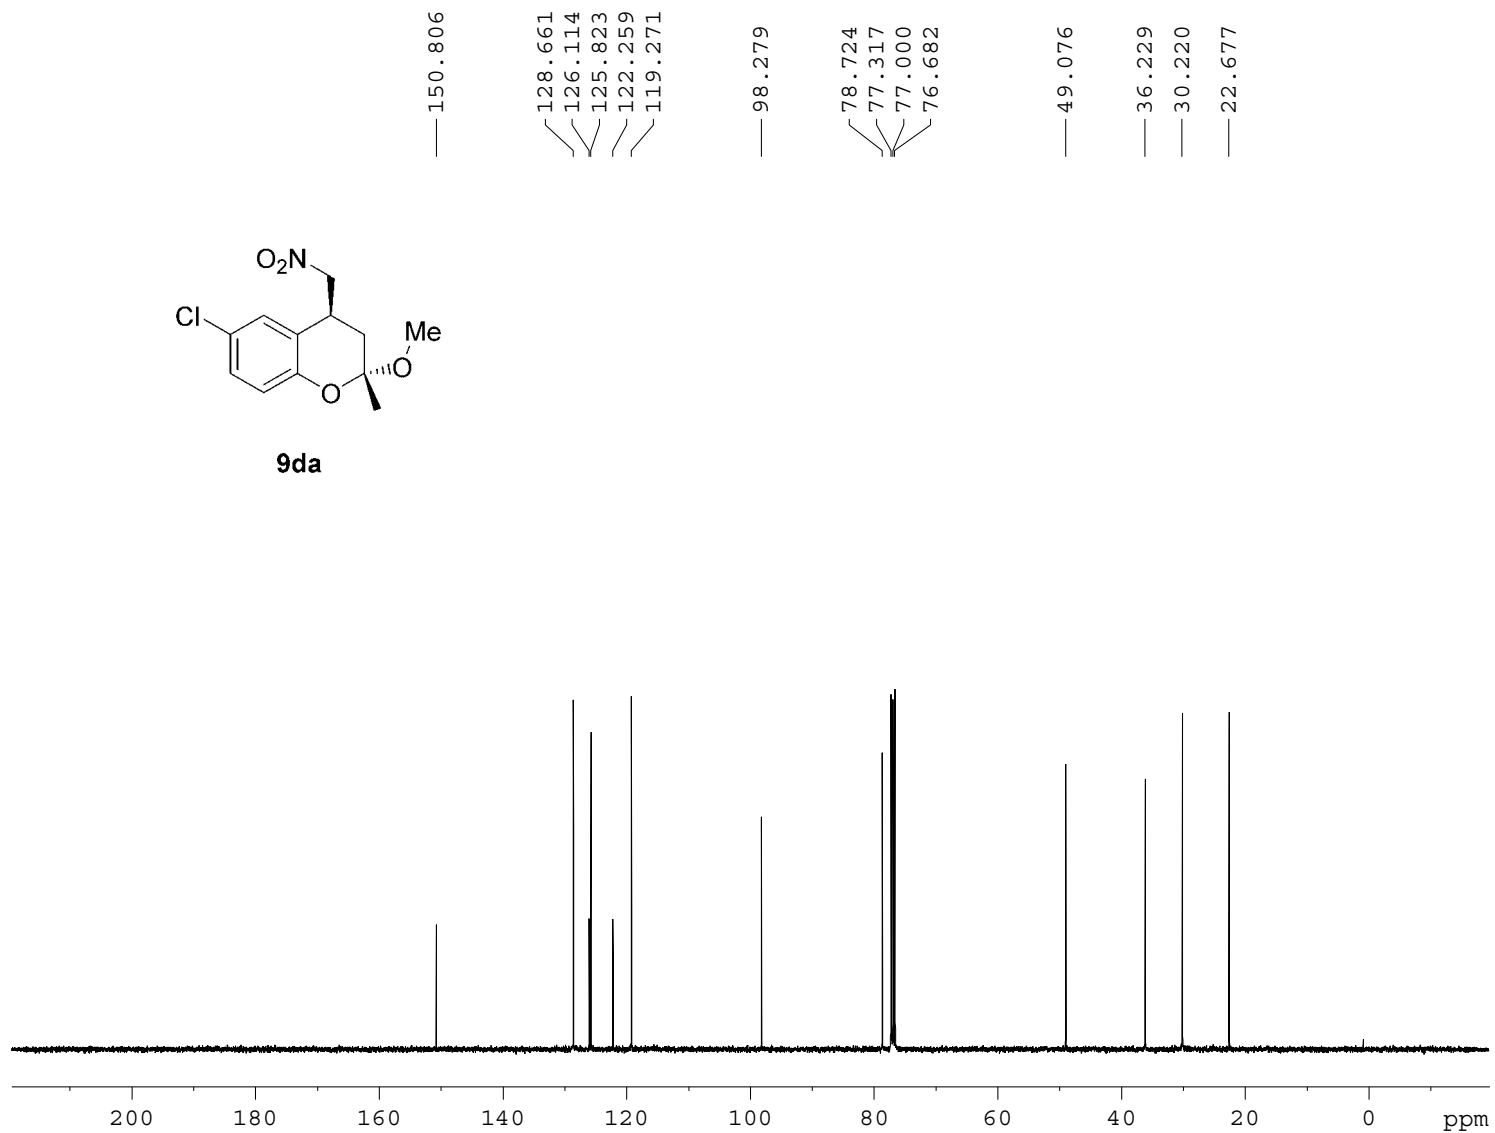

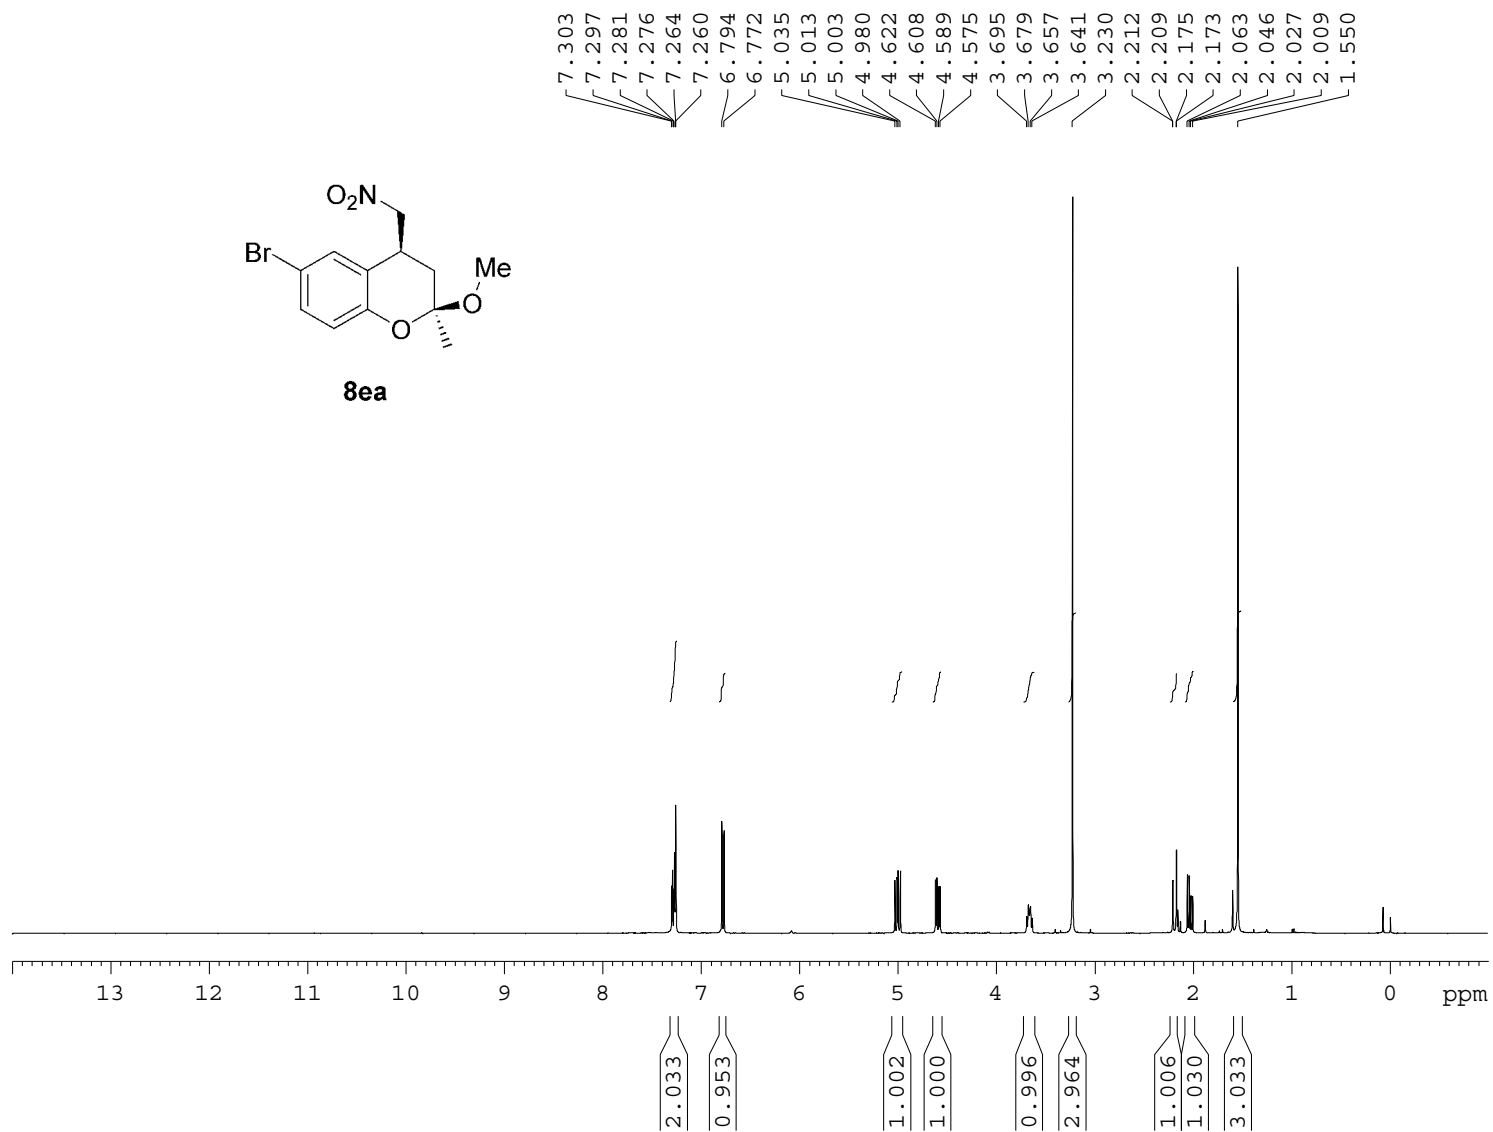

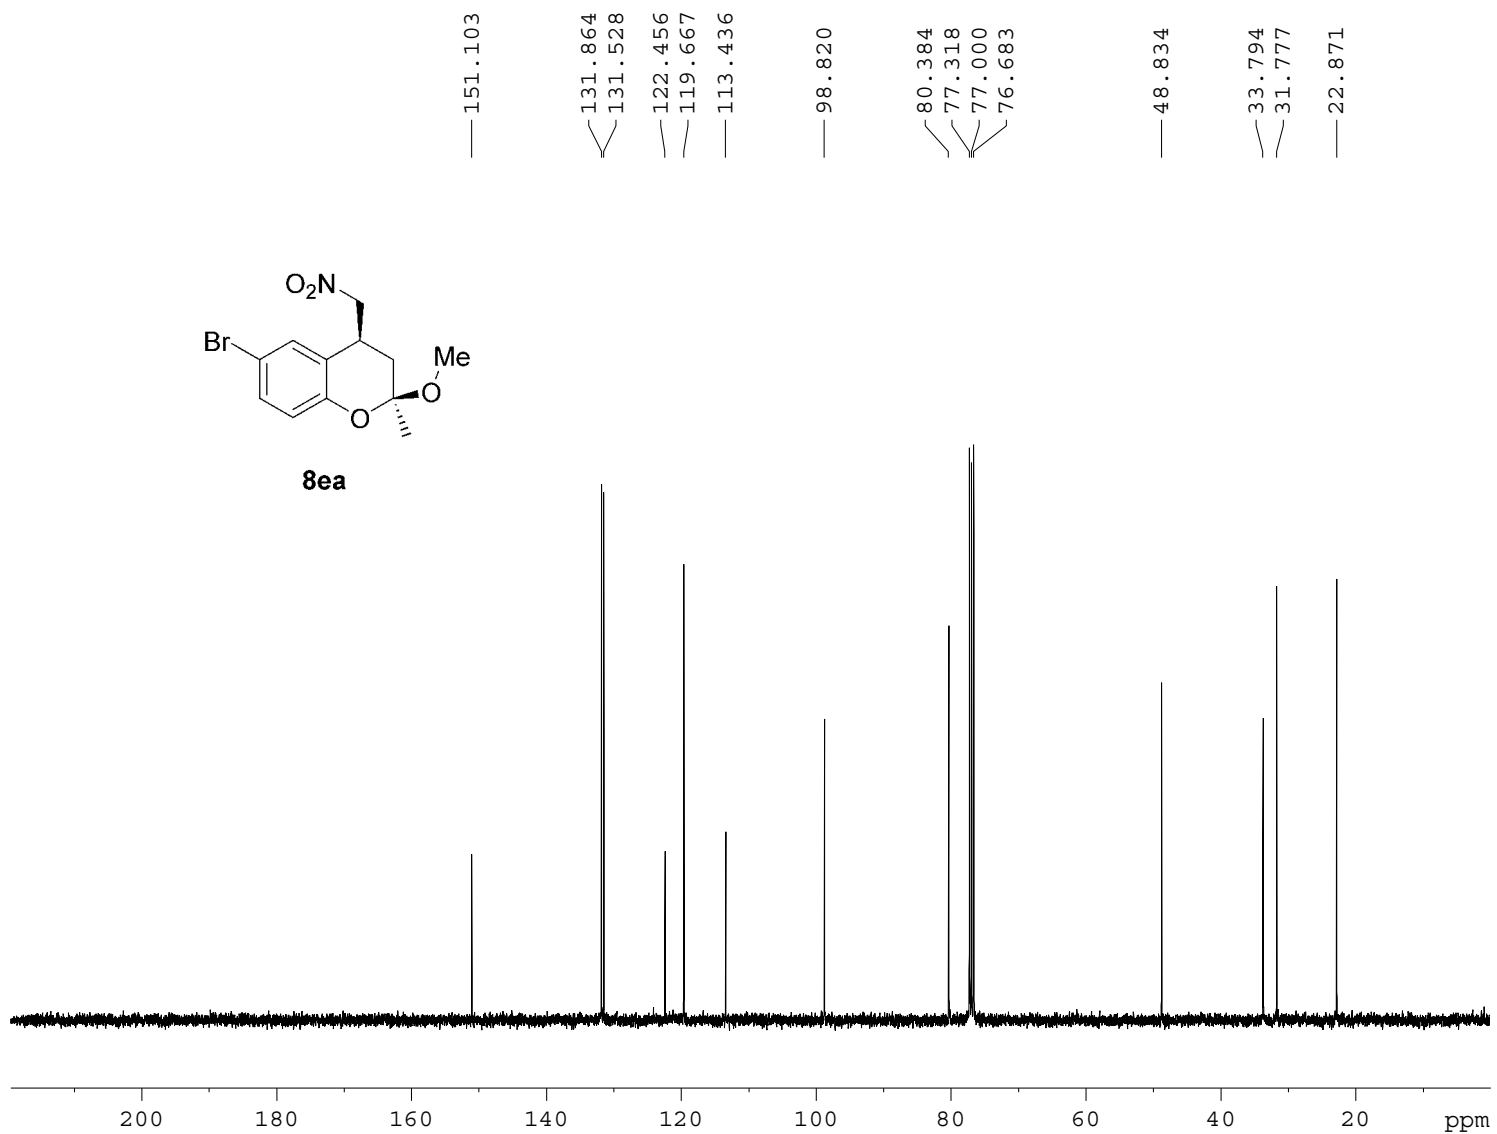

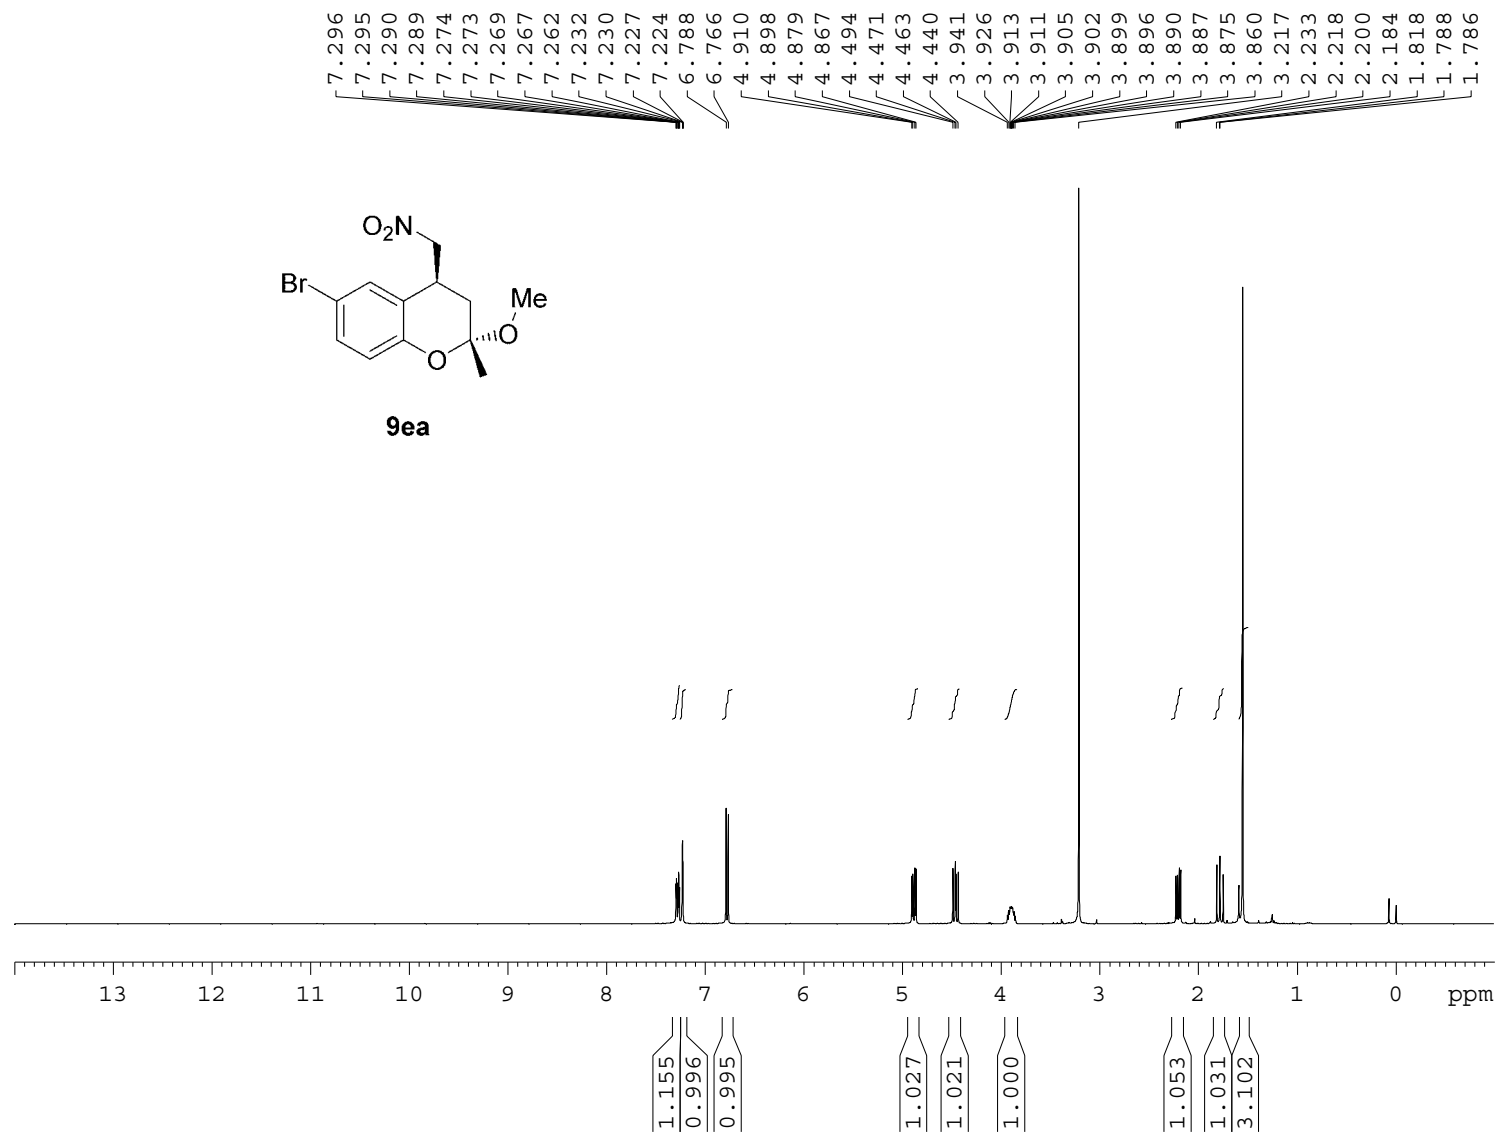

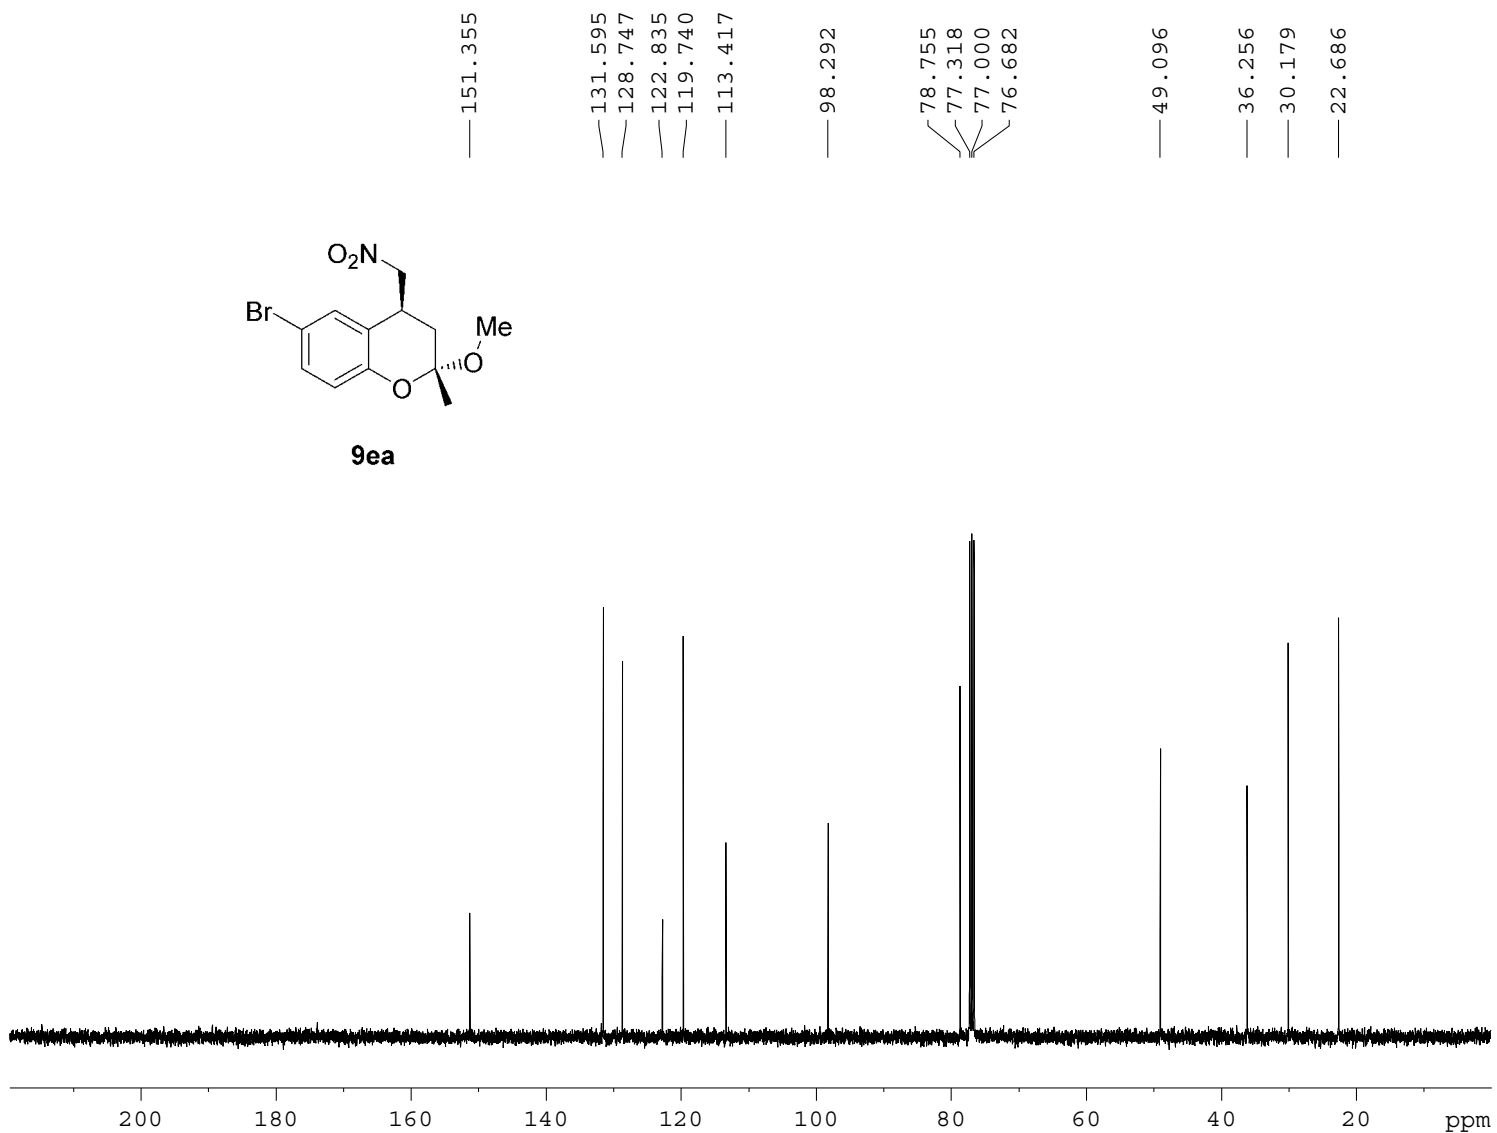



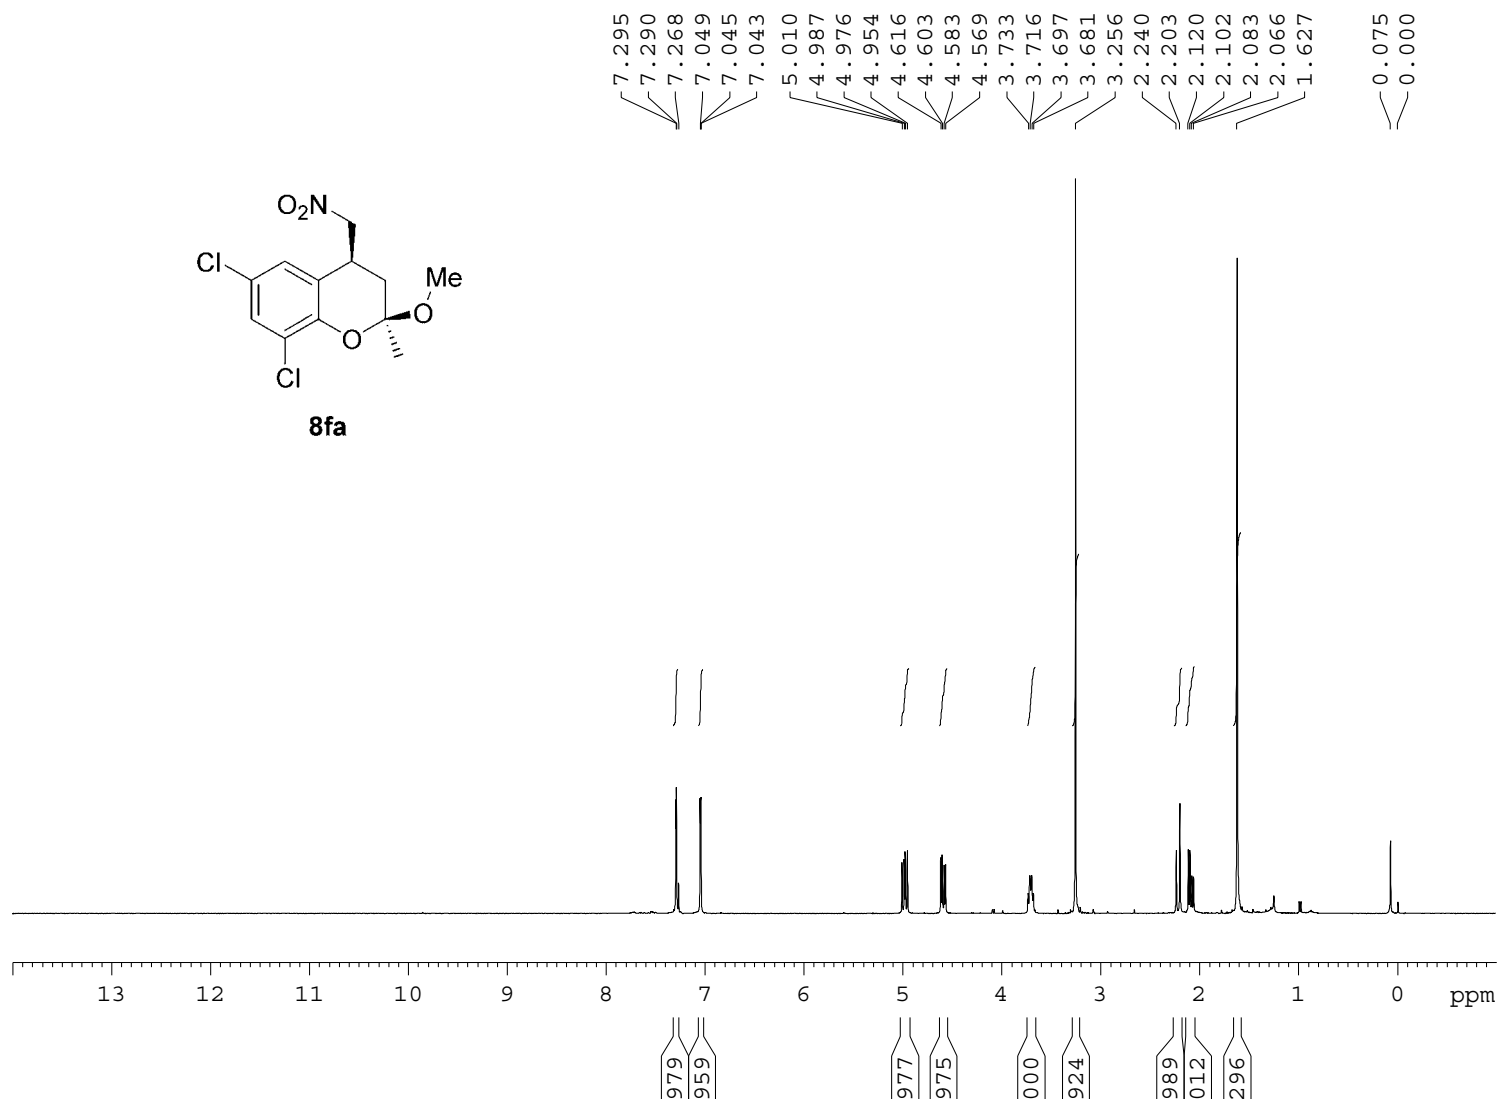

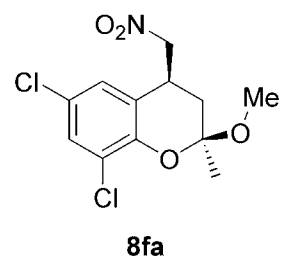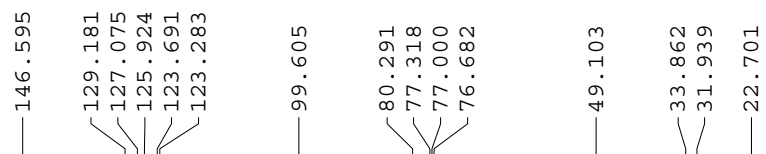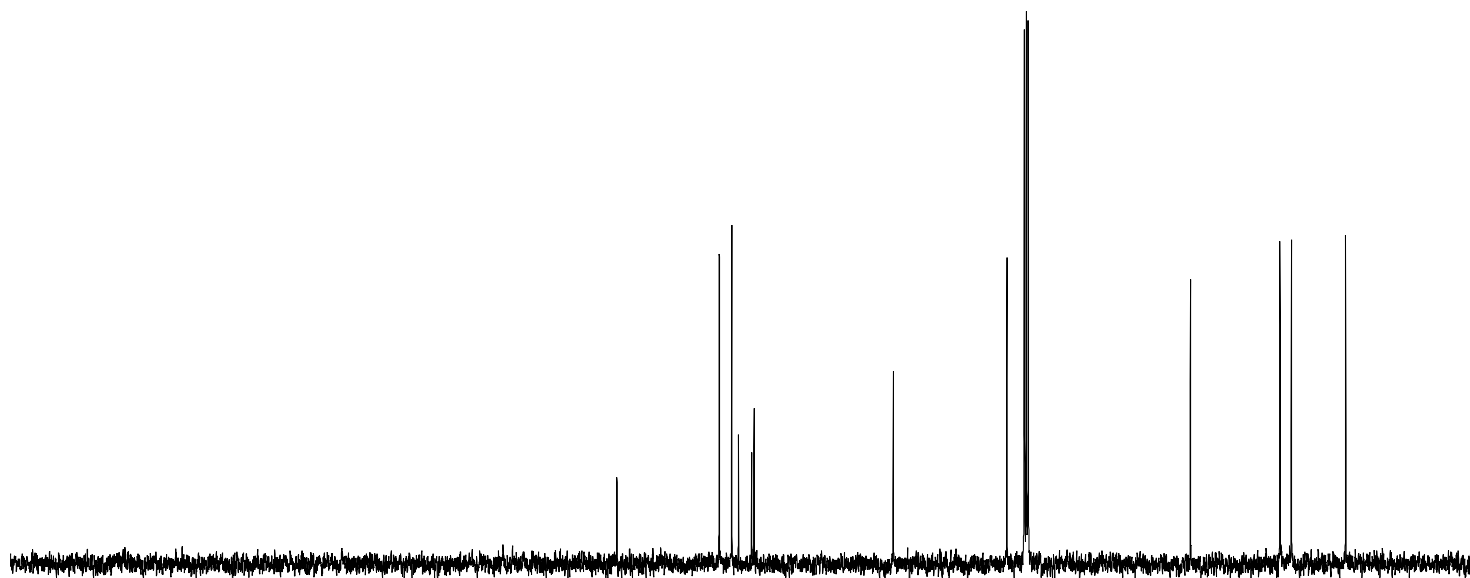

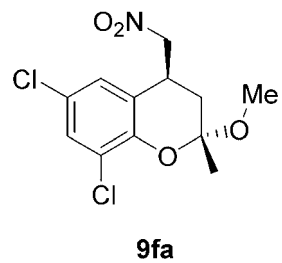

7.288  
7.284  
7.282  
7.265  
7.023  
7.020  
7.018  
4.879  
4.868  
4.848  
4.836  
4.525  
4.503  
4.494  
4.471  
3.942  
3.929  
3.914  
3.903  
3.895  
3.892  
3.878  
3.864  
3.233  
2.273  
2.257  
2.240  
2.224  
1.895  
1.863  
1.832  
1.633  
0.073  
0.000

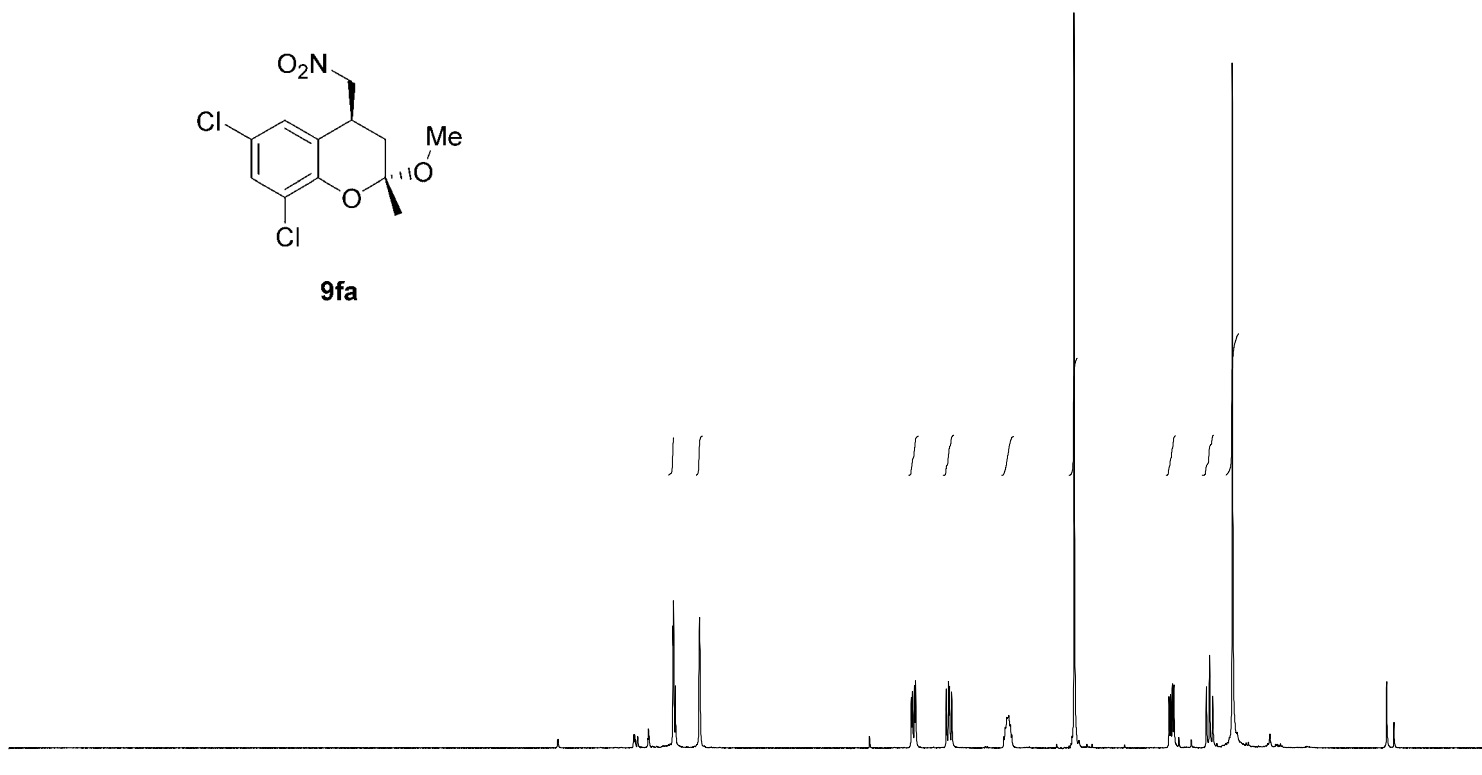

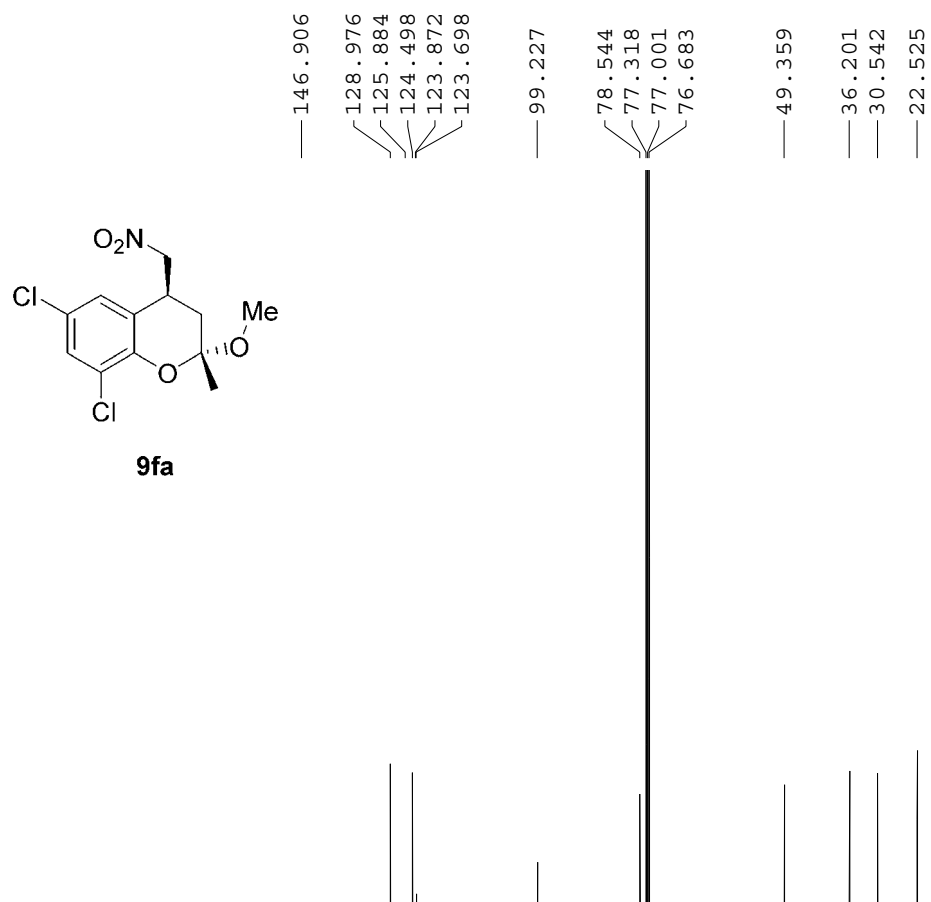

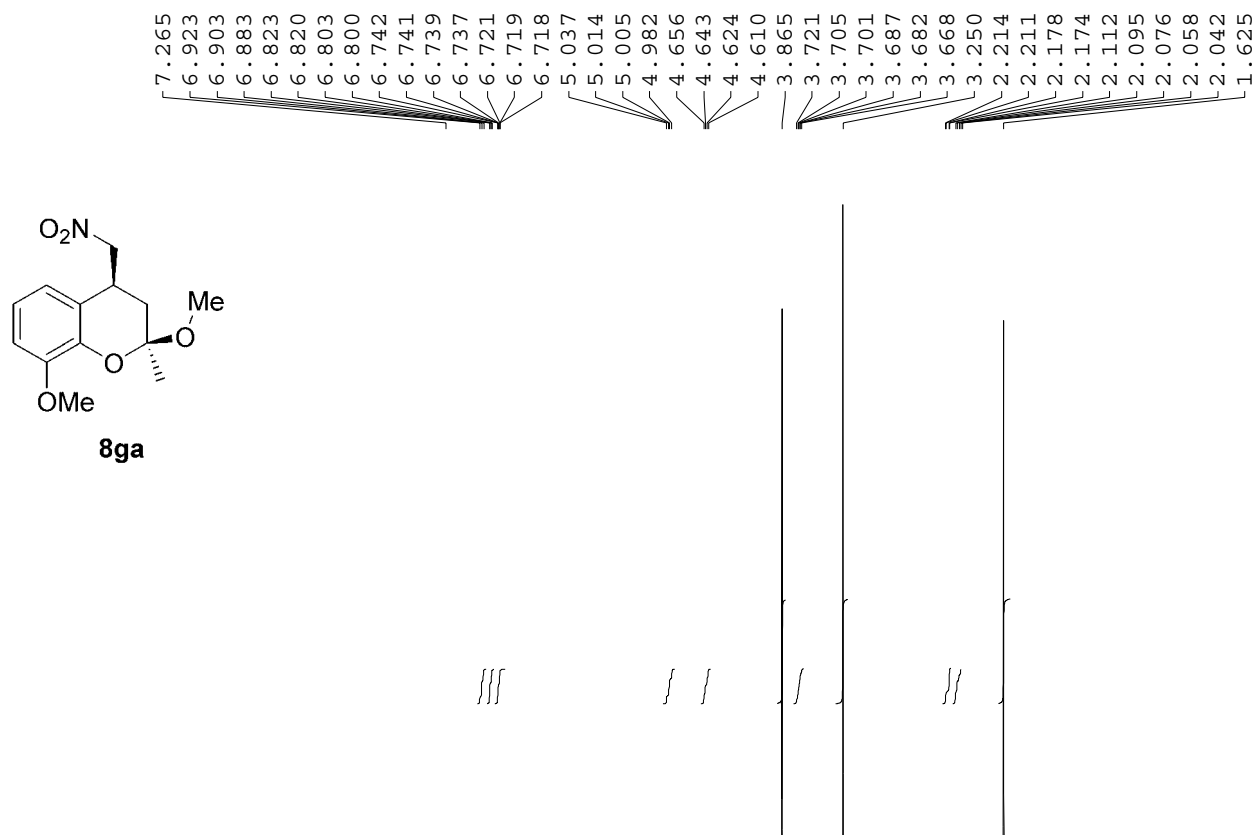

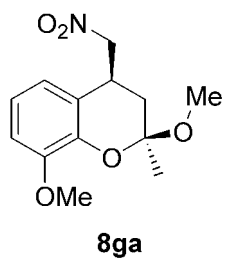

— 149.019

— 141.320

121.055

120.928

120.393

— 110.644

— 98.564

80.647

77.319

77.001

76.683

— 55.943

— 48.827

33.860

31.966

— 23.070

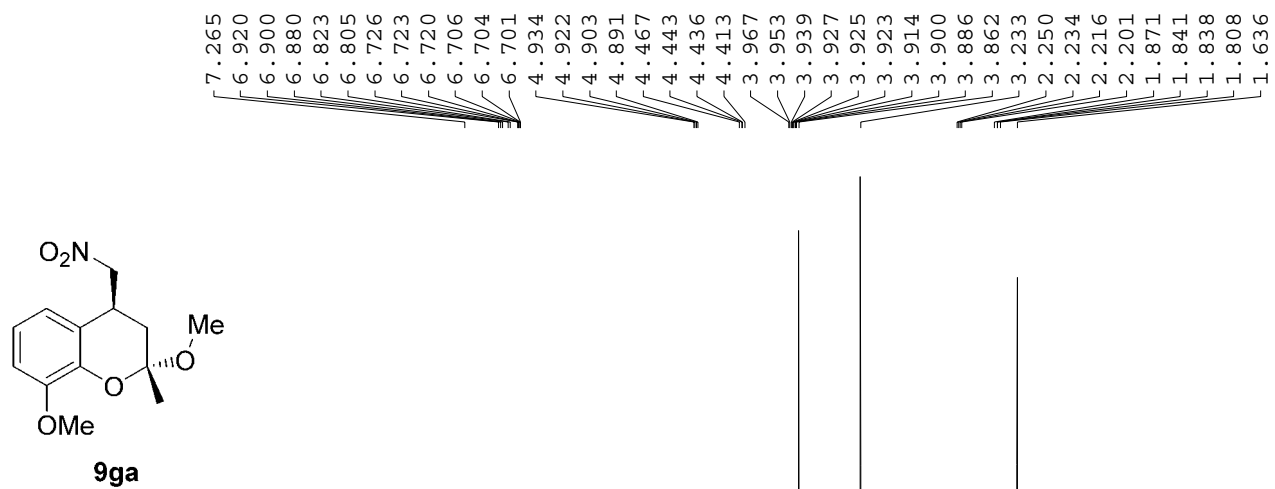

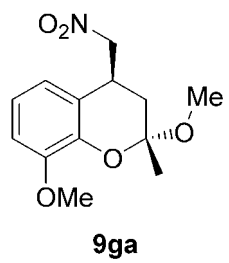

—149.157

—141.515

121.519

120.828

117.566

—110.653

—98.153

79.320

77.317

77.000

76.681

—55.980

—49.127

—36.526

—30.427

—22.922



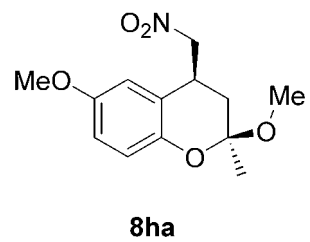

7.261  
6.836  
6.814  
6.789  
6.784  
6.767  
6.762  
6.646  
6.641  
5.032  
5.009  
5.000  
4.977  
4.656  
4.642  
4.624  
4.610  
3.748  
3.681  
3.664  
3.646  
3.628  
3.219  
2.179  
2.142  
2.067  
2.050  
2.031  
2.013  
1.531  
0.076  
0.000

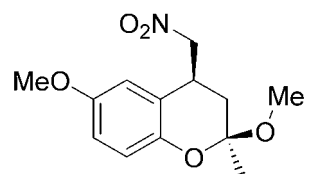

— 154.012

— 145.649

— 120.680

— 118.433

— 115.115

— 113.118

— 98.374

— 80.736

— 77.318

— 77.000

— 76.682

— 55.655

— 48.618

— 33.952

— 32.316

— 22.979

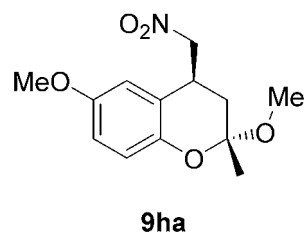

7.261  
6.836  
6.772  
6.766  
6.750  
6.744  
6.640  
6.635  
4.913  
4.901  
4.882  
4.870  
4.482  
4.459  
4.452  
4.428  
3.933  
3.919  
3.904  
3.892  
3.882  
3.867  
3.853  
3.750  
3.209  
2.221  
2.206  
2.188  
2.173  
1.823  
1.792  
1.760  
1.543  
0.000

—153.930  
—145.931  
  
121.210  
118.453  
114.122  
111.249  
—97.841  
  
79.236  
77.318  
77.000  
76.683  
  
—55.663  
—48.922  
  
—36.568  
—30.588  
—22.825

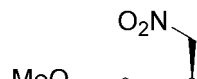

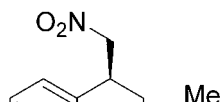

7.267  
7.022  
7.001  
6.556  
6.550  
6.535  
6.529  
6.453  
6.447  
4.982  
4.960  
4.950  
4.928  
4.628  
4.614  
4.596  
4.582  
3.777  
3.657  
3.640  
3.619  
3.603  
3.595  
3.263  
2.198  
2.162  
2.071  
2.054  
2.035  
2.018  
1.551  
0.084  
0.007  
0.006

Supplementary Material (ESI) for Organic & Biomolecular Chemistry

This journal is (c) The Royal Society of Chemistry 2010

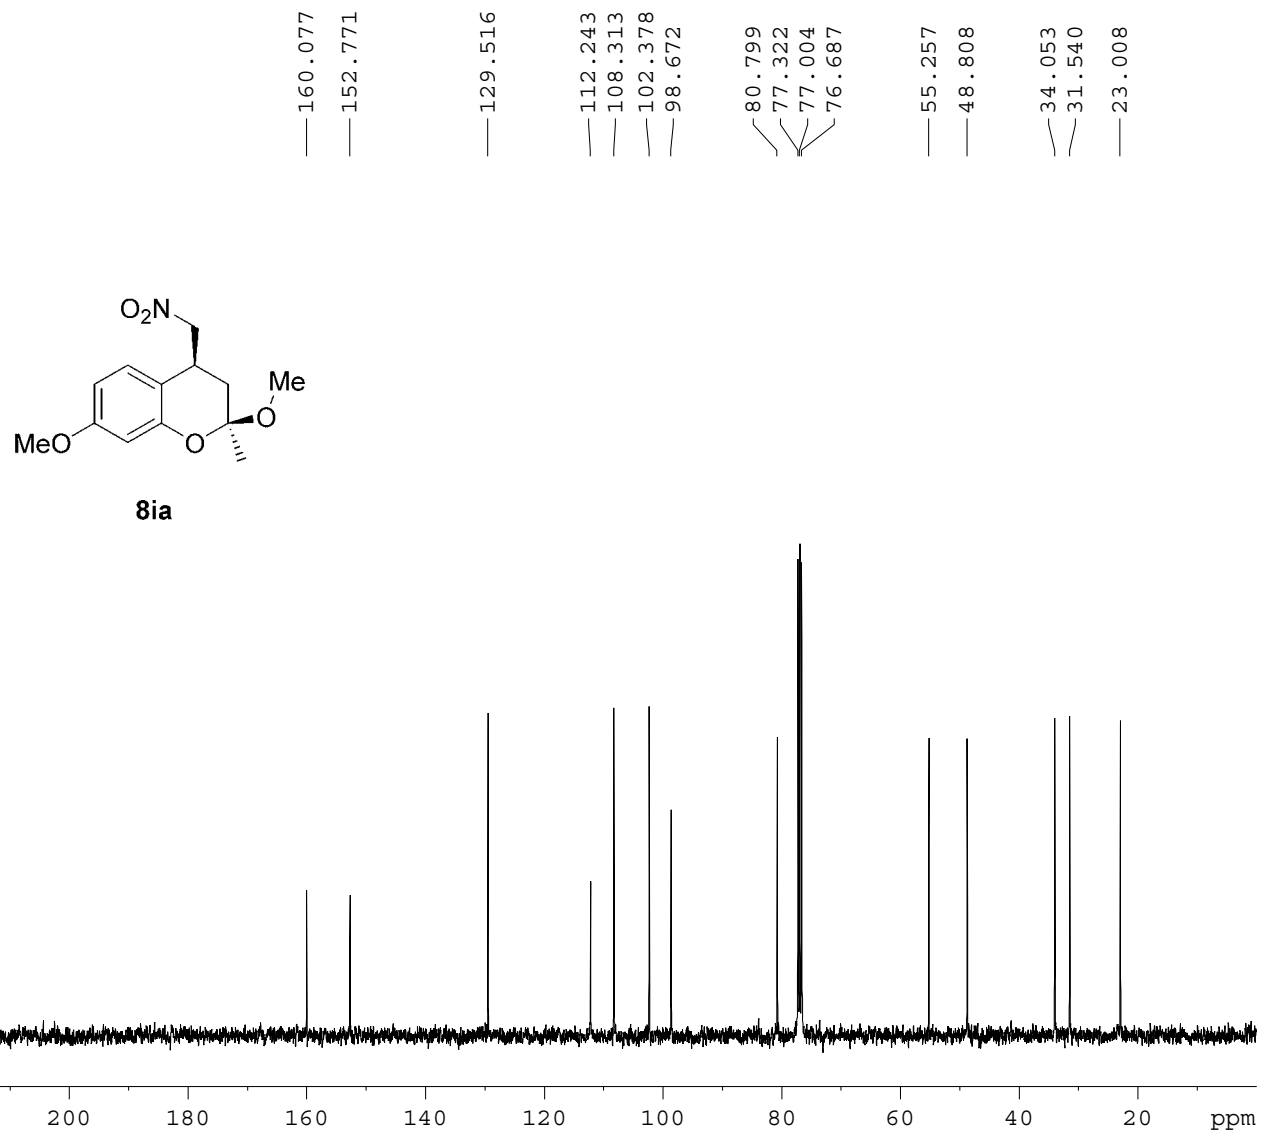

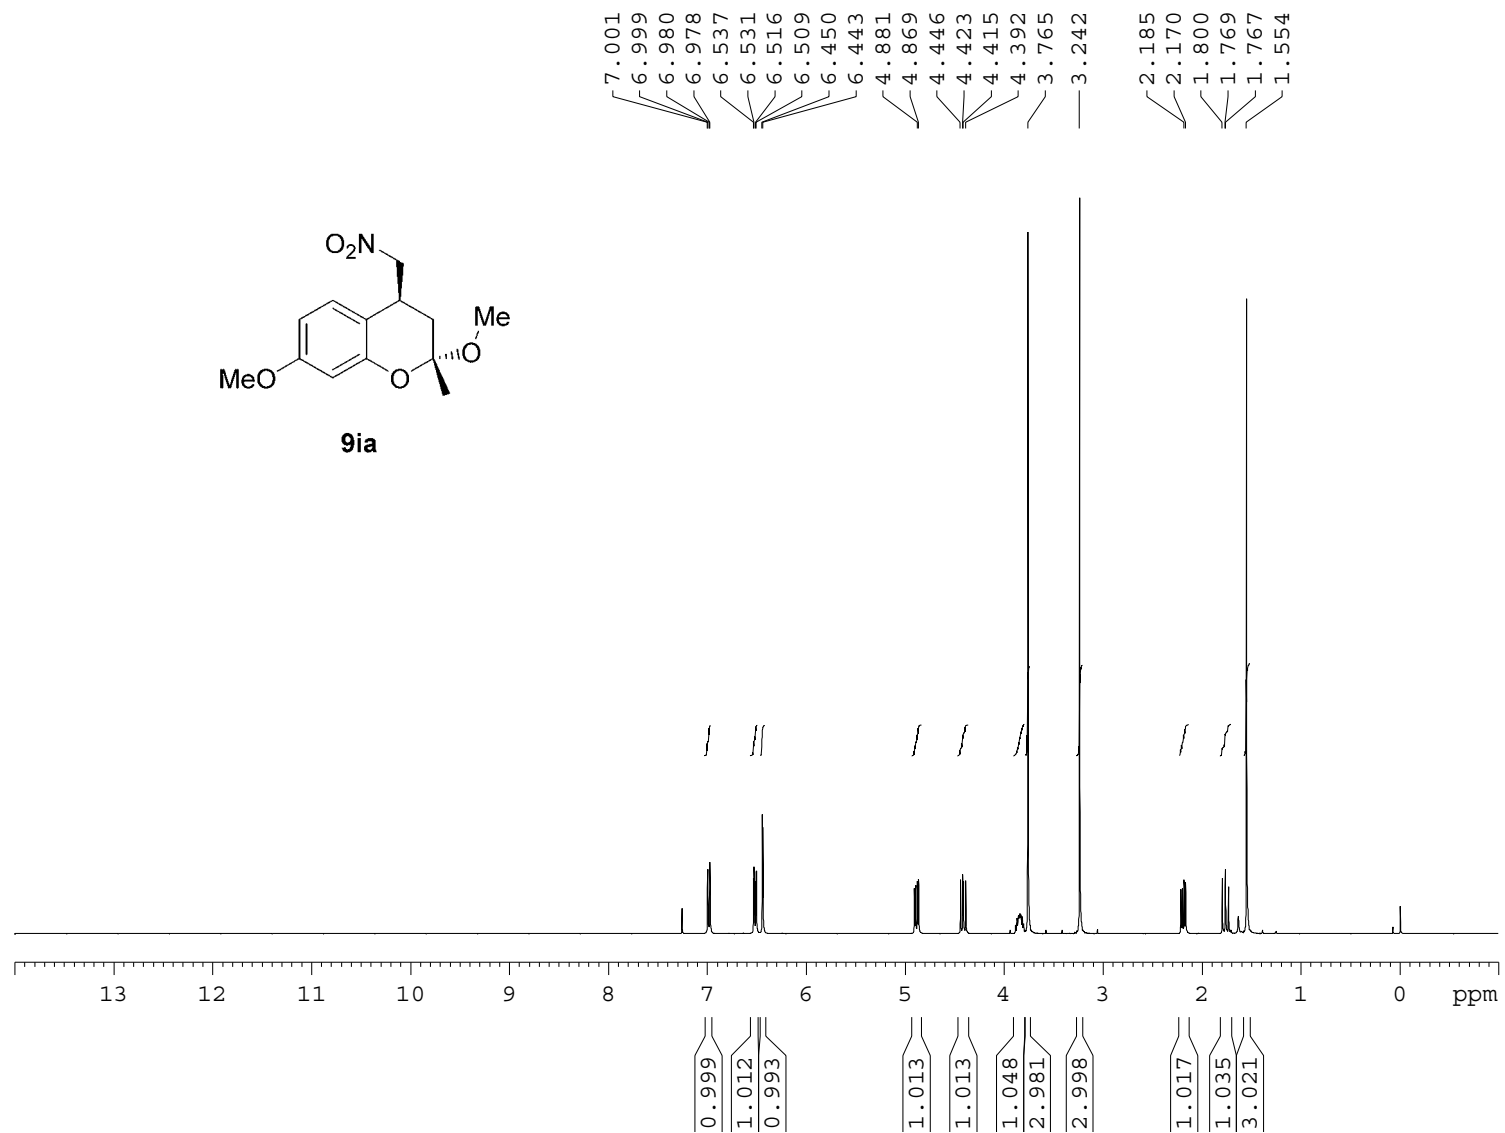



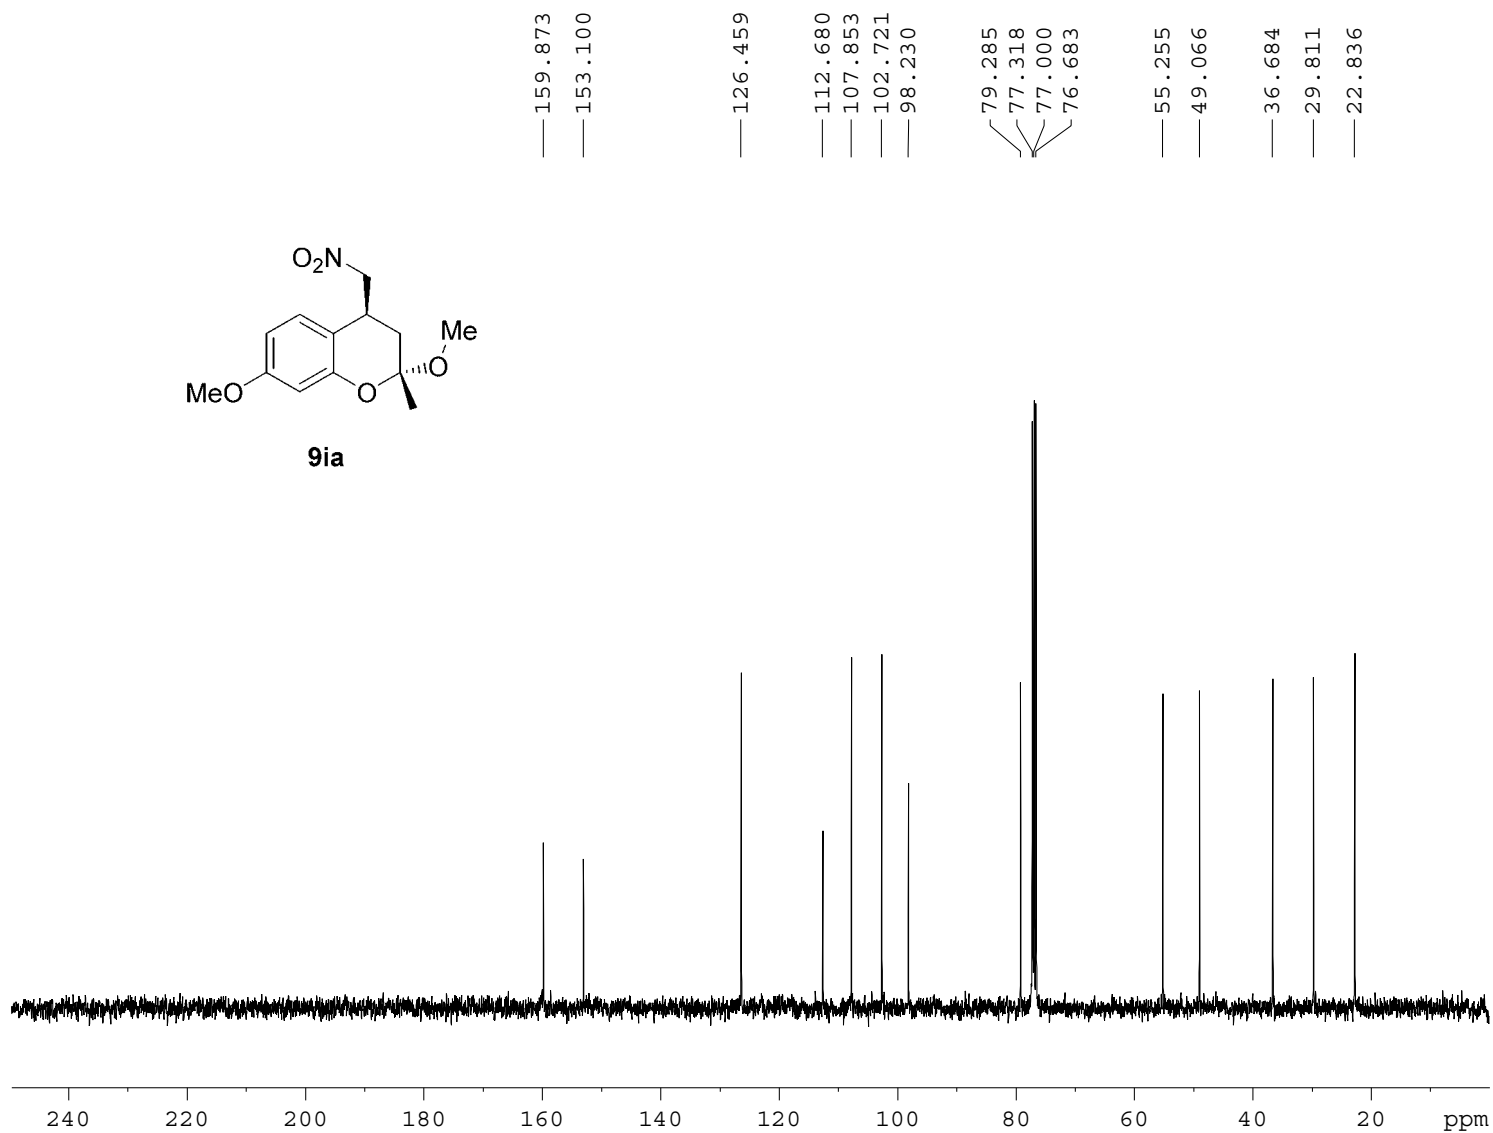

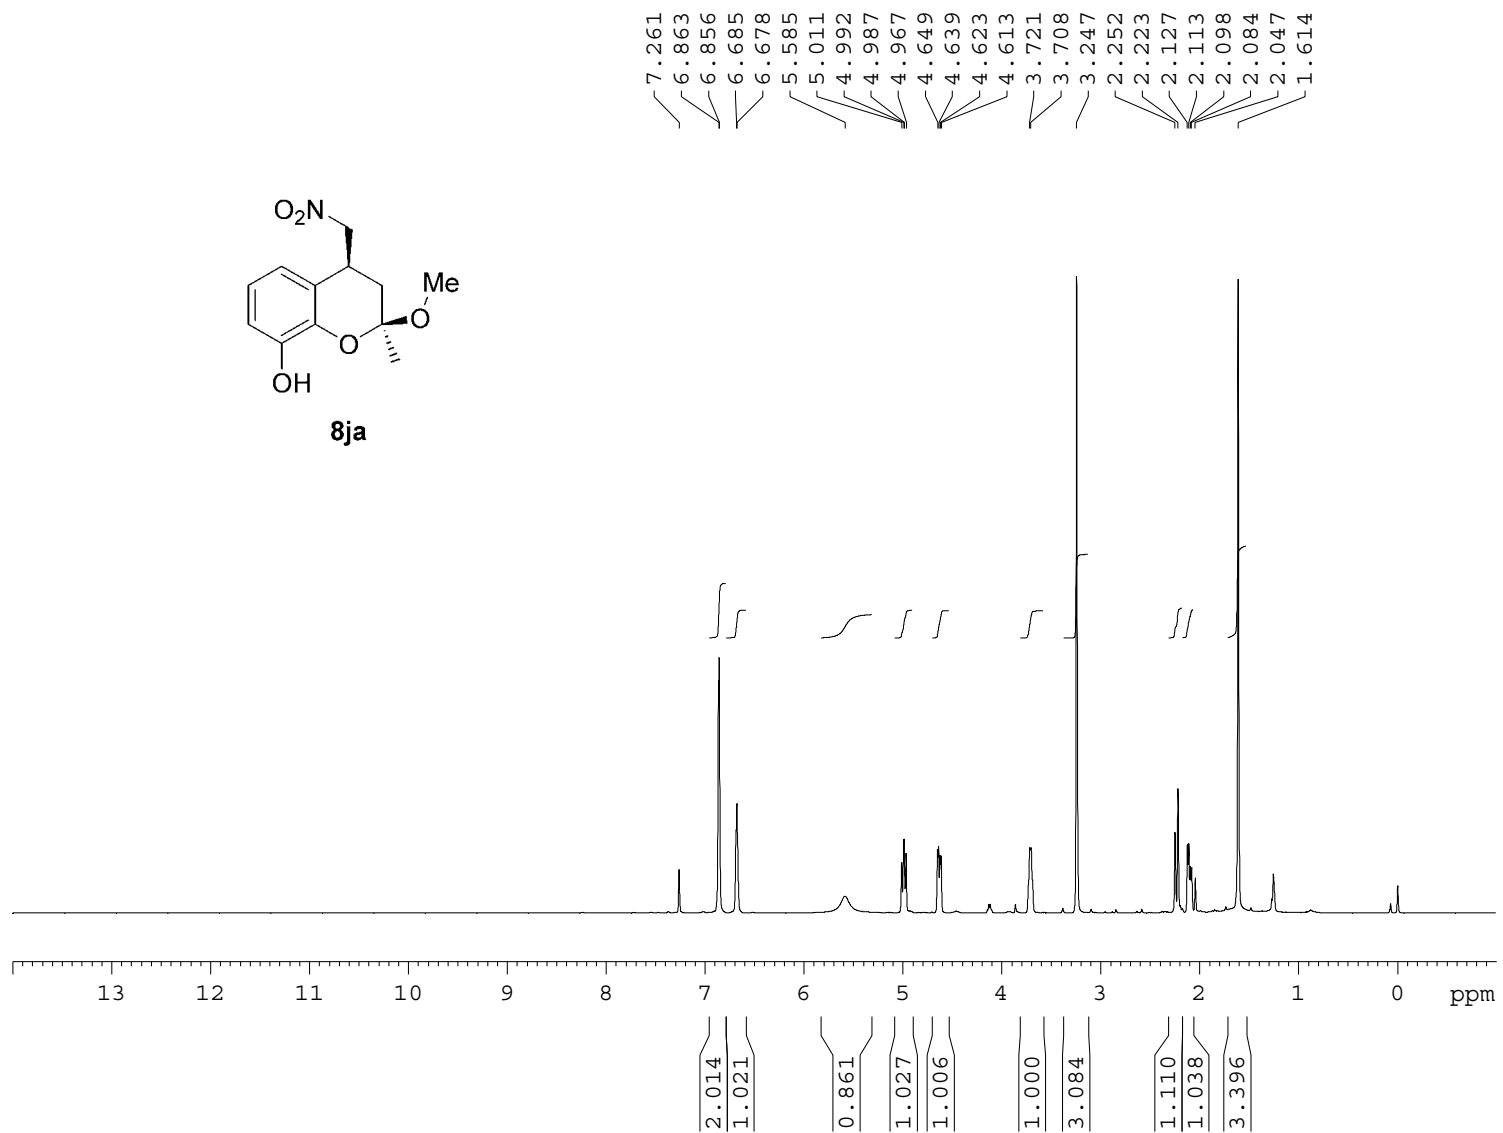

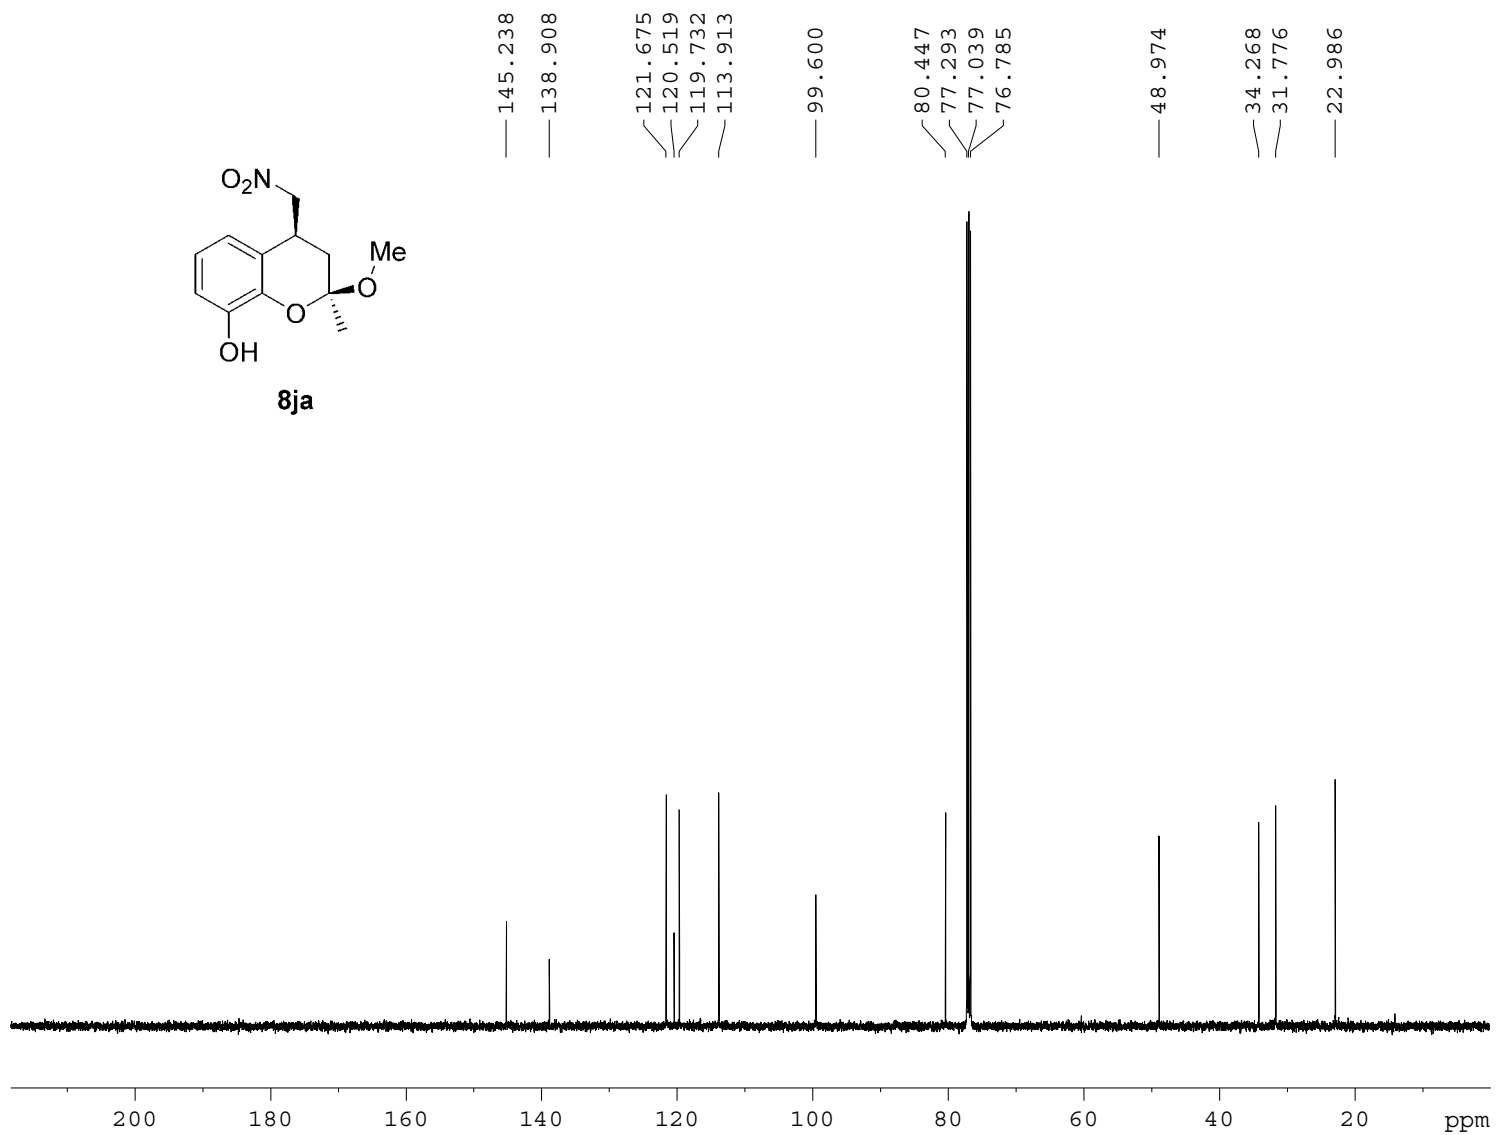

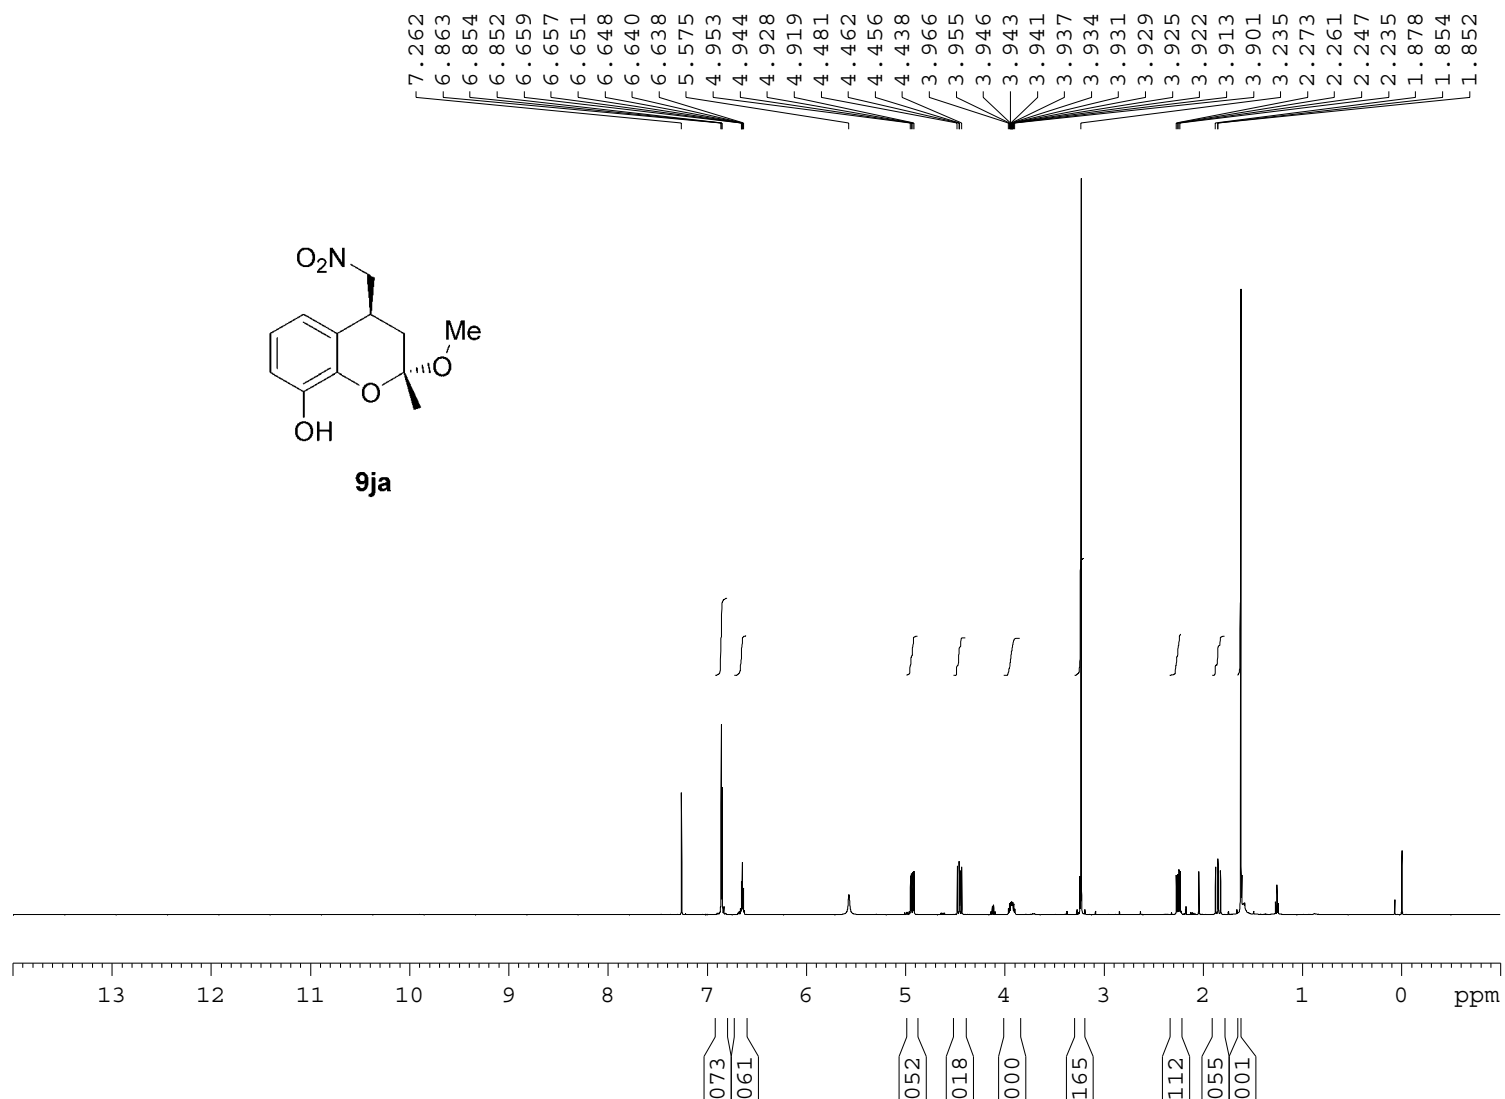

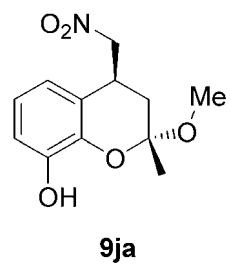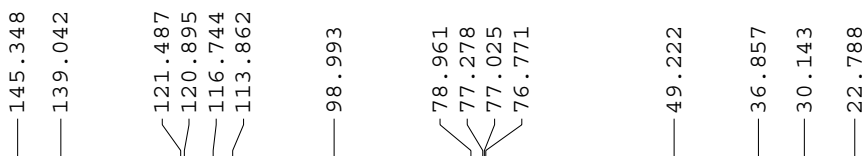

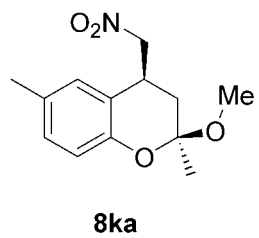

7.247  
7.011  
7.006  
6.991  
6.985  
6.925  
6.921  
6.801  
6.781  
5.036  
5.013  
5.004  
4.981  
4.640  
4.627  
4.608  
4.595  
3.663  
3.648  
3.629  
3.625  
3.610  
3.226  
2.269  
2.192  
2.189  
2.156  
2.153  
2.060  
2.043  
2.024  
2.007  
1.535

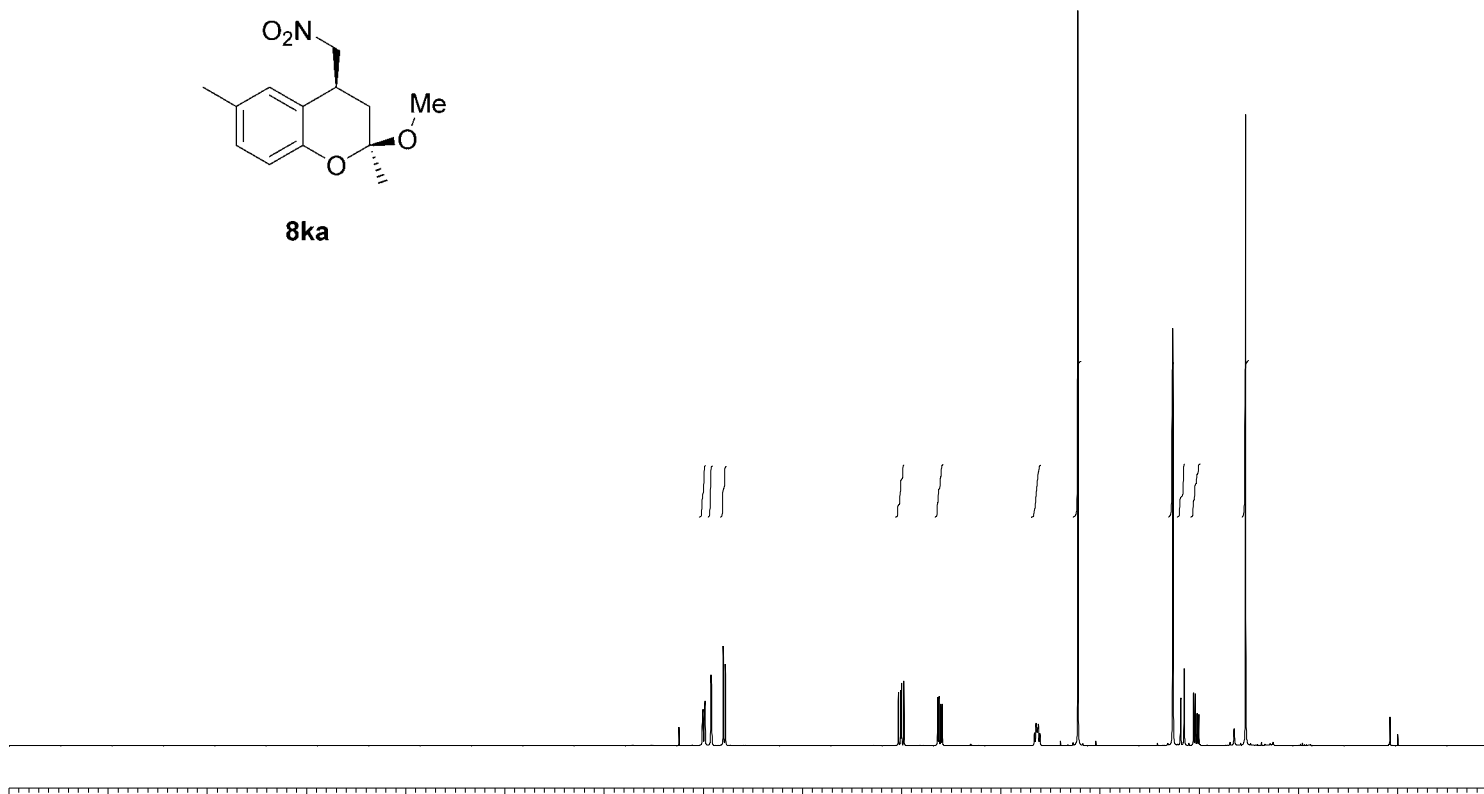

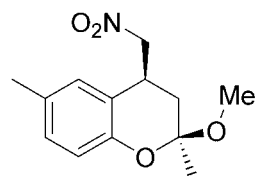

**8ka**

|   |         |   |        |   |        |
|---|---------|---|--------|---|--------|
| — | 149.585 | — | 98.428 | — | 48.648 |
| < | 130.706 | < | 80.751 | < | 33.963 |
| > | 129.533 | > | 77.318 | > | 31.998 |
| < | 129.141 | < | 77.000 | < | 23.006 |
| > | 119.801 | > | 76.683 | > | 20.457 |
| < | 117.506 |   |        |   |        |

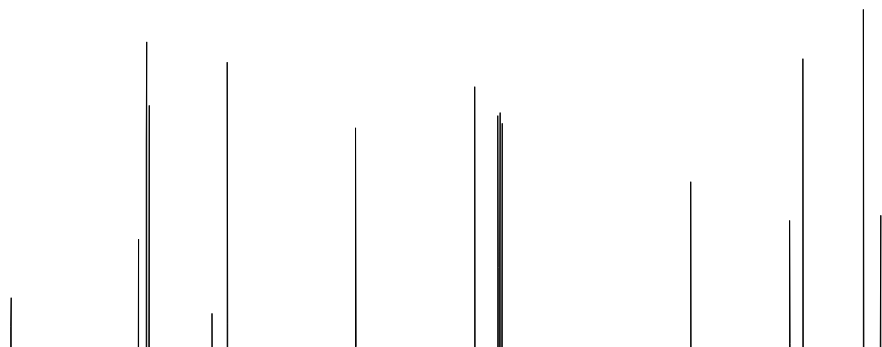

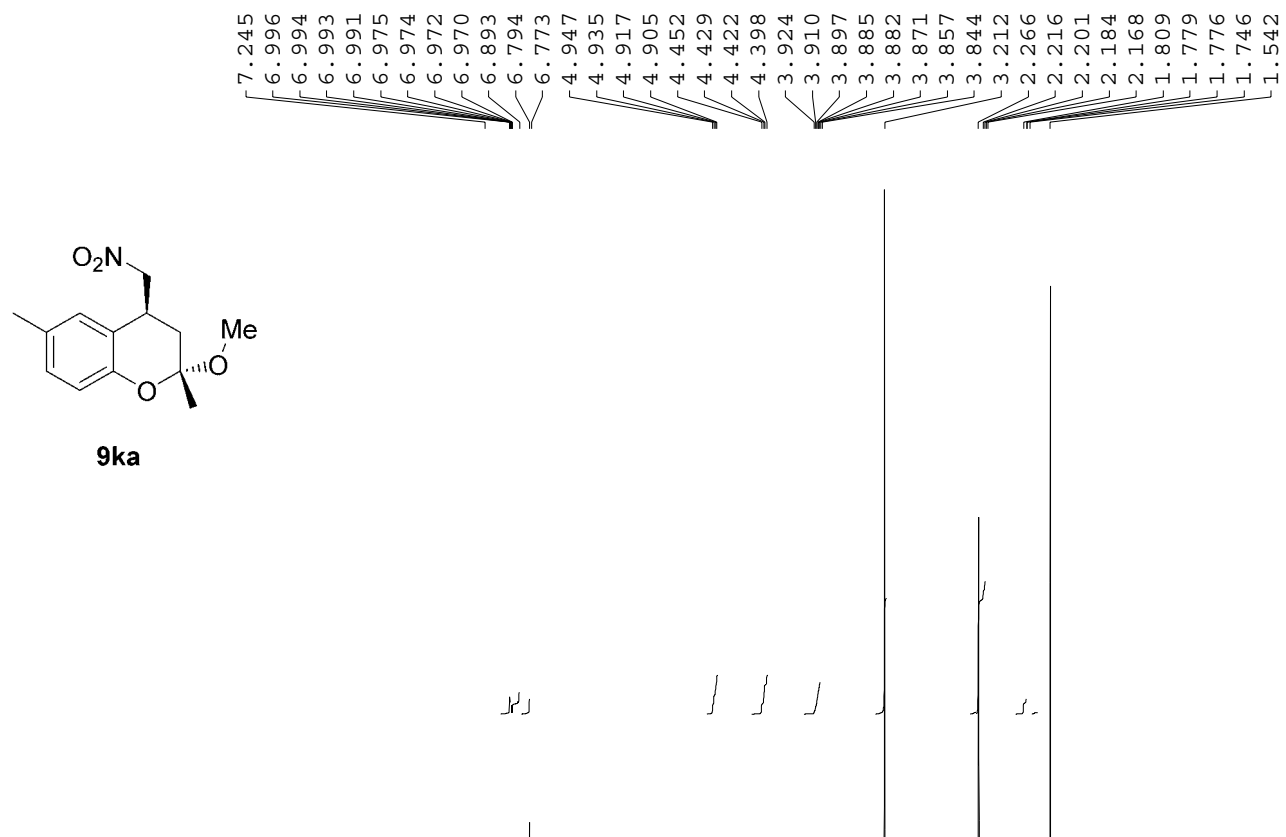



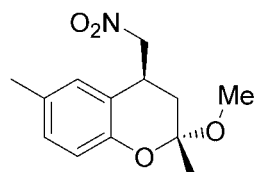

**9ka**

|   |         |
|---|---------|
| — | 149.797 |
| — | 130.492 |
| — | 129.234 |
| — | 126.188 |
| — | 120.193 |
| — | 117.630 |
| — | 97.849  |
| — | 79.264  |
| — | 77.318  |
| — | 77.000  |
| — | 76.682  |
| — | 48.936  |
| — | 36.623  |
| — | 30.224  |
| — | 22.833  |
| — | 20.632  |

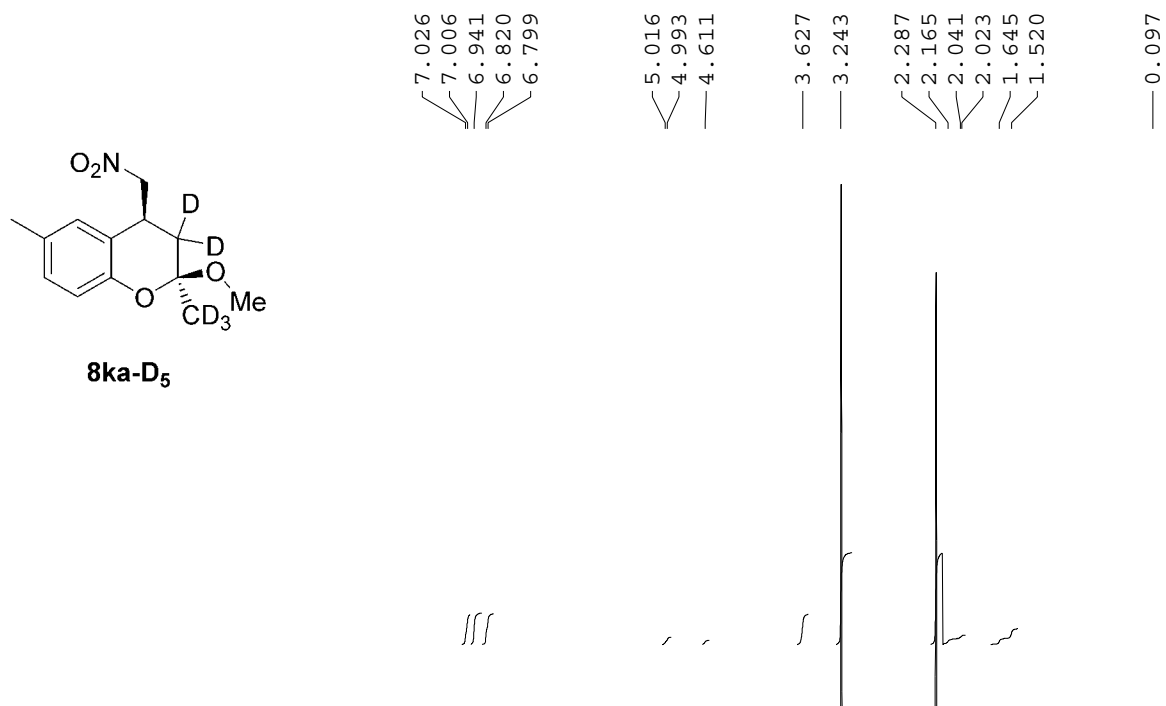

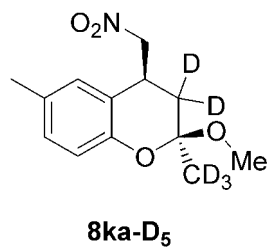

— 149.592

< 130.710  
< 129.539  
< 129.161  
< 119.761  
< 117.510

— 98.286

< 77.317  
< 76.999  
< 76.682

— 48.660

< 31.749  
< 31.685  
— 20.474

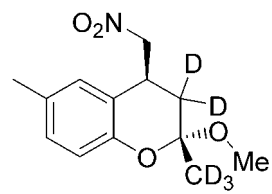

**9ka-D<sub>5</sub>**

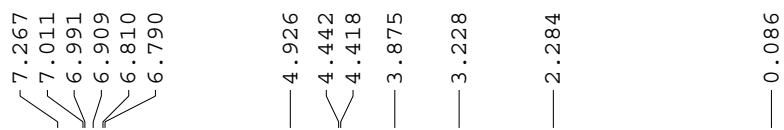

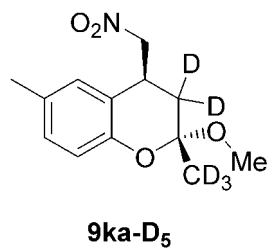

—149.866

130.574  
129.313  
126.278  
120.216  
117.709

—97.767

79.033  
77.369  
77.051  
76.734

—49.013

30.040  
29.967  
22.081  
20.721

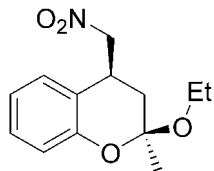

7.256  
7.207  
7.189  
7.172  
7.169  
7.125  
7.107  
6.957  
6.939  
6.920  
6.880  
6.859  
5.090  
5.067  
5.057  
5.035  
4.672  
4.658  
4.640  
4.626  
3.720  
3.704  
3.683  
3.667  
3.615  
3.598  
3.580  
3.564  
2.224  
2.188  
2.068  
2.051  
2.032  
2.015  
1.561  
1.046  
1.029  
1.011

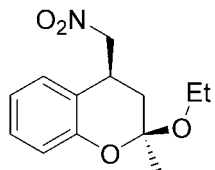

— 151.996

128.906  
128.812  
121.328  
120.211  
117.751

— 98.388

80.907  
77.319  
77.001  
76.684

— 56.862

34.230  
32.096  
— 23.755  
— 15.395

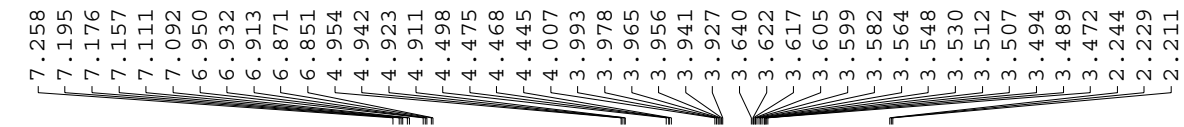



Supplementary Material (ESI) for Organic & Biomolecular Chemistry

This journal is (c) The Royal Society of Chemistry 2010

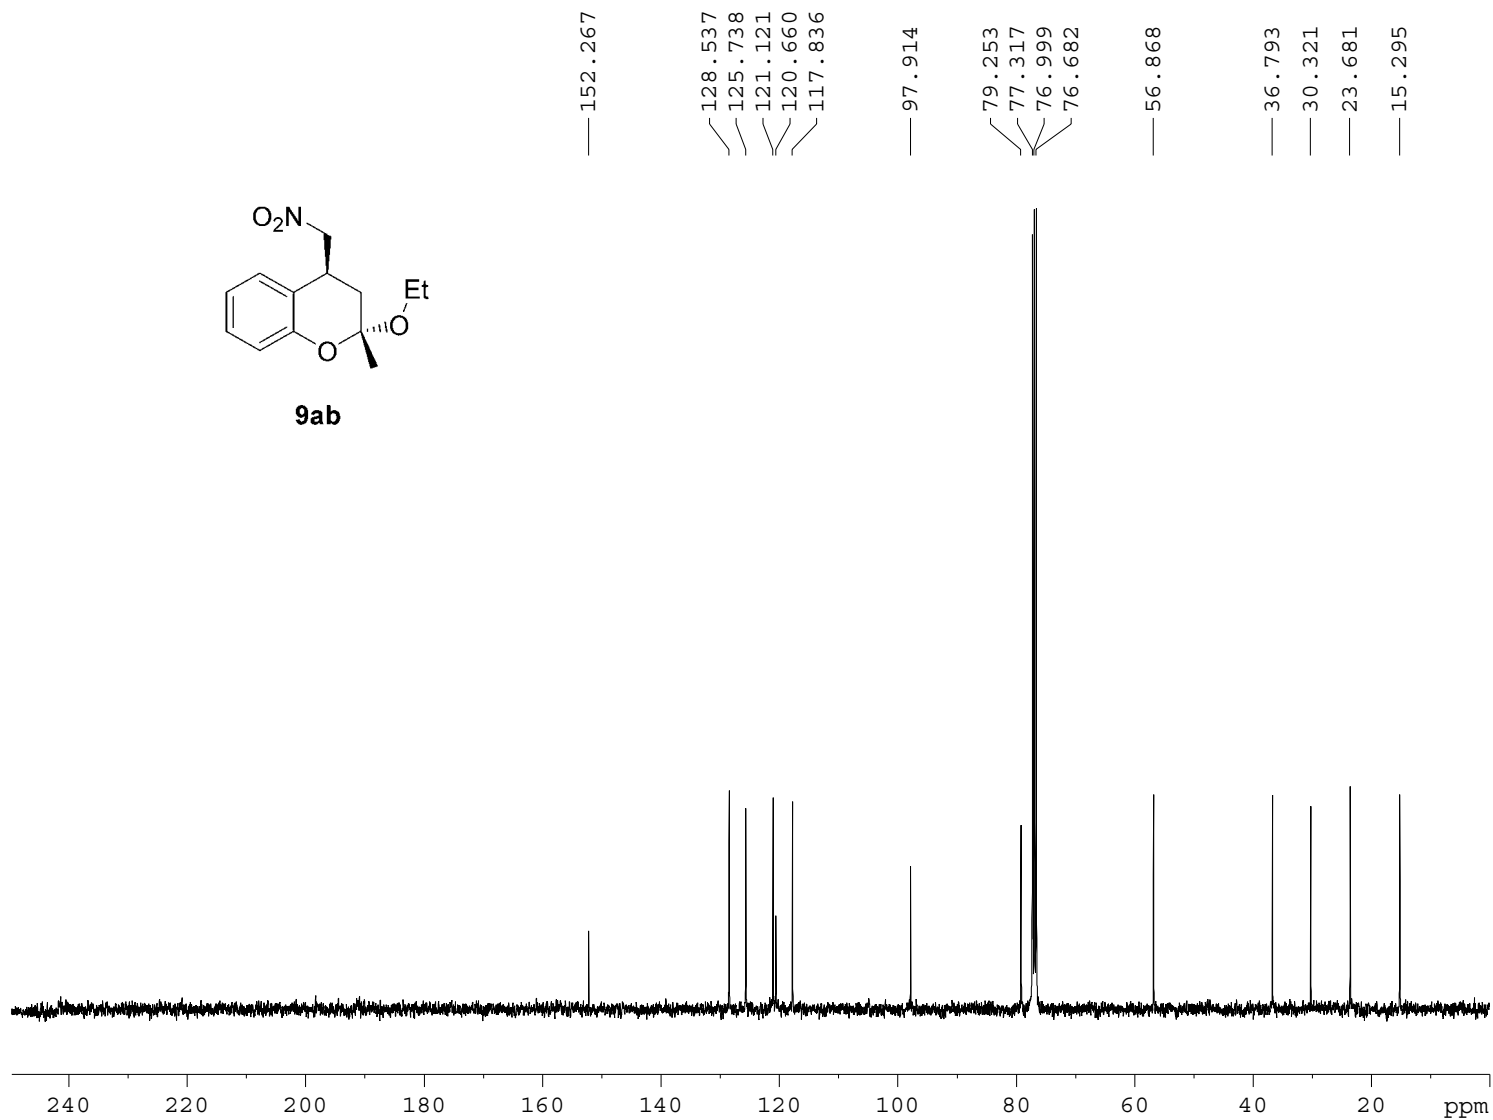

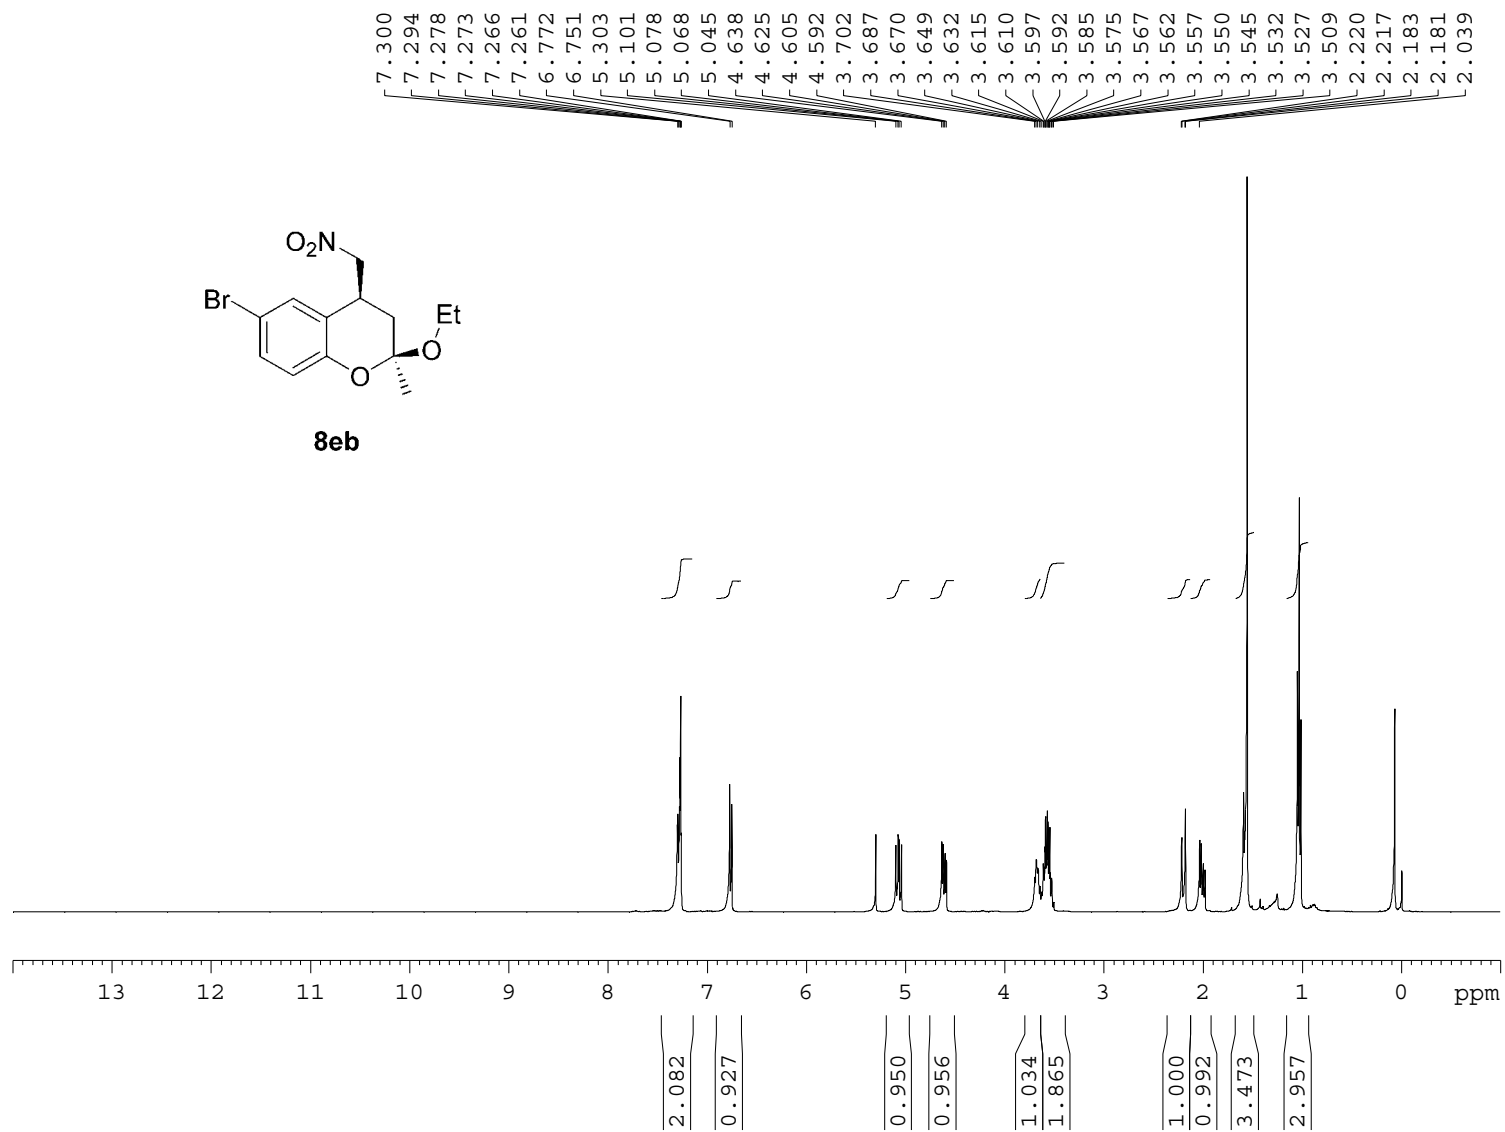

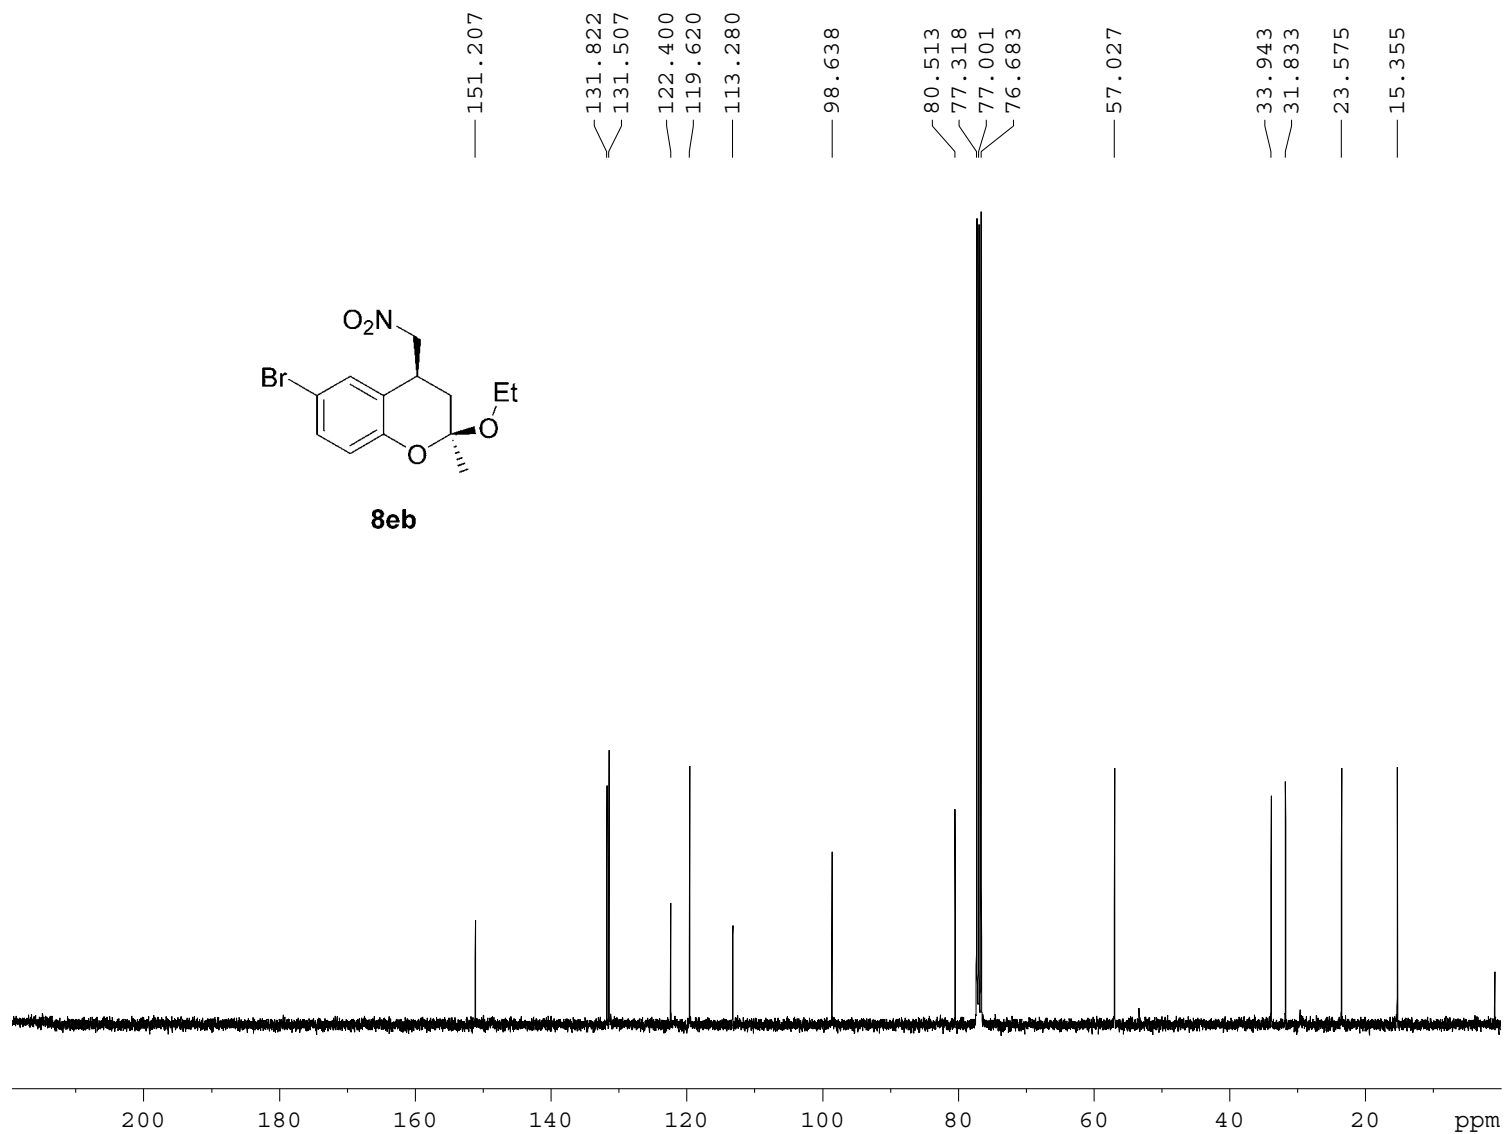

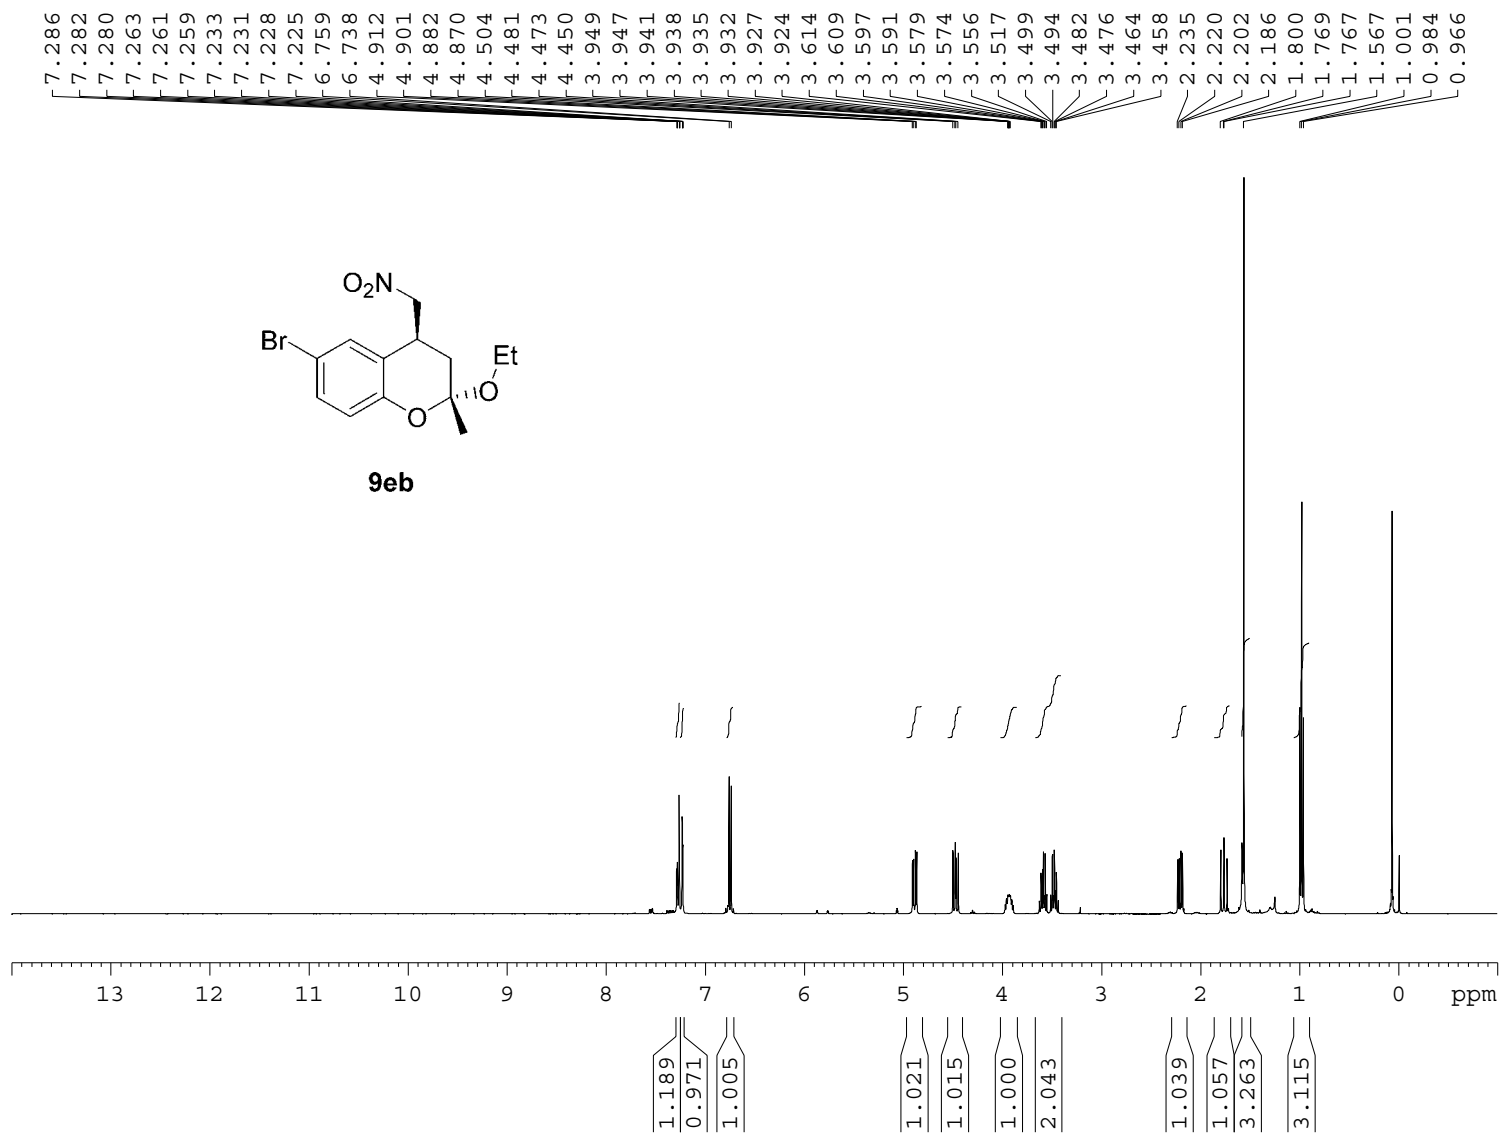

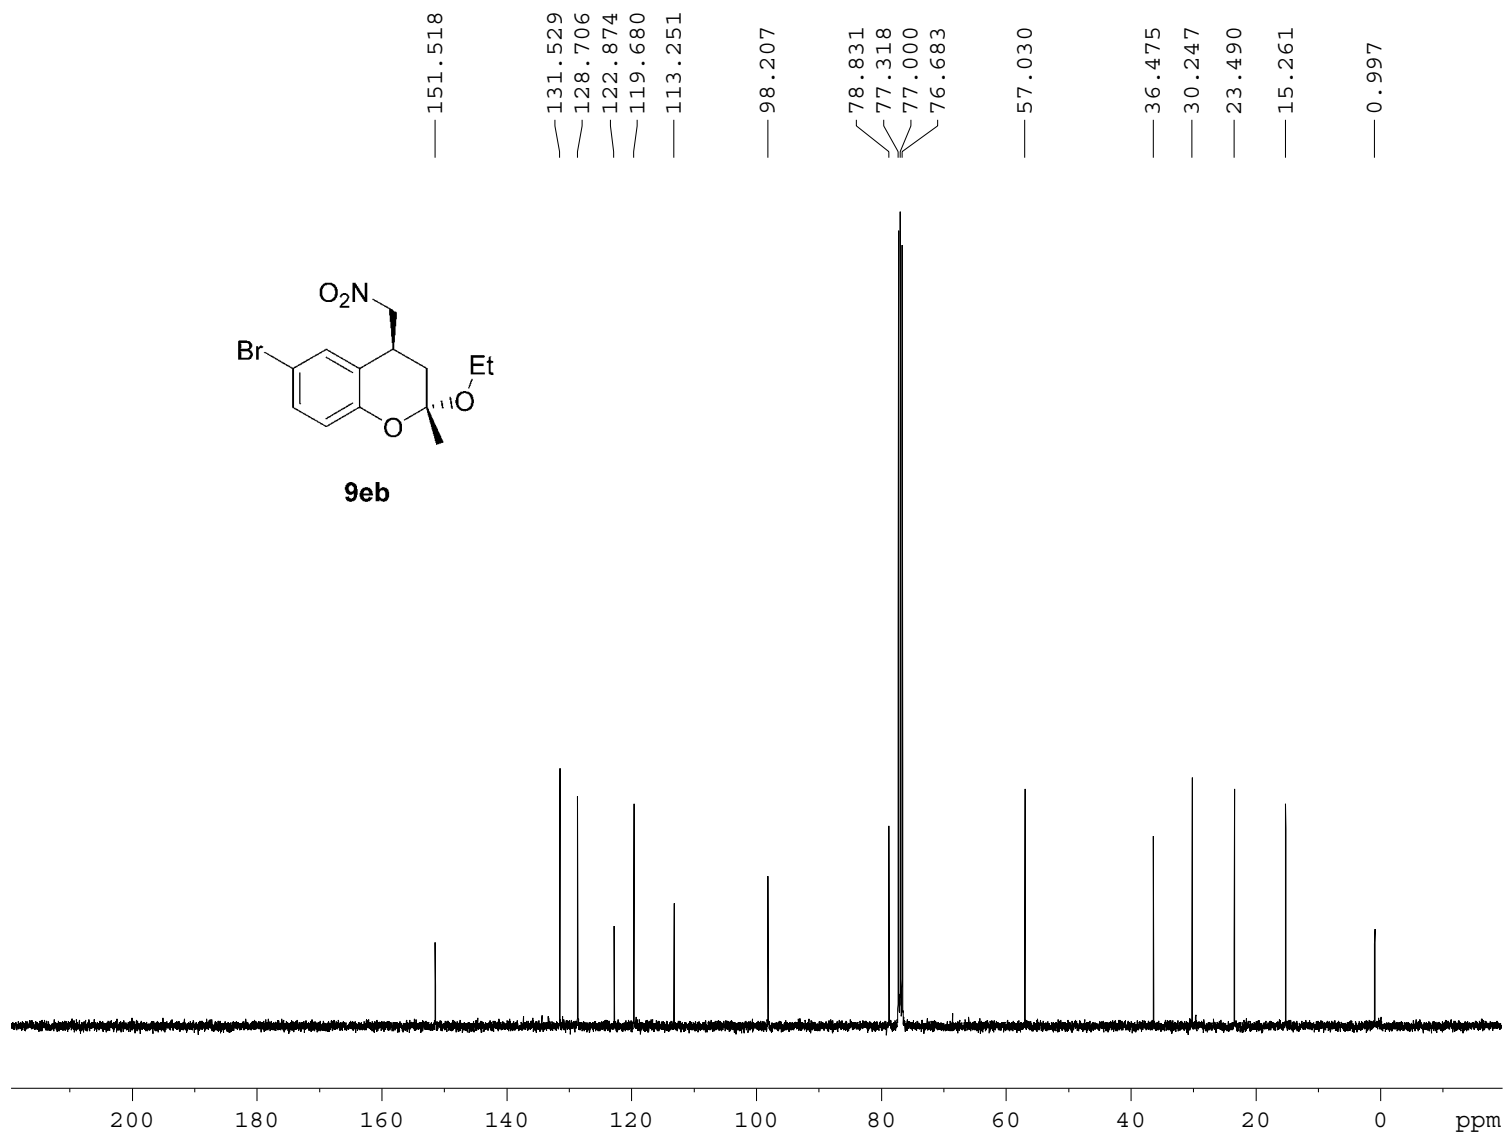

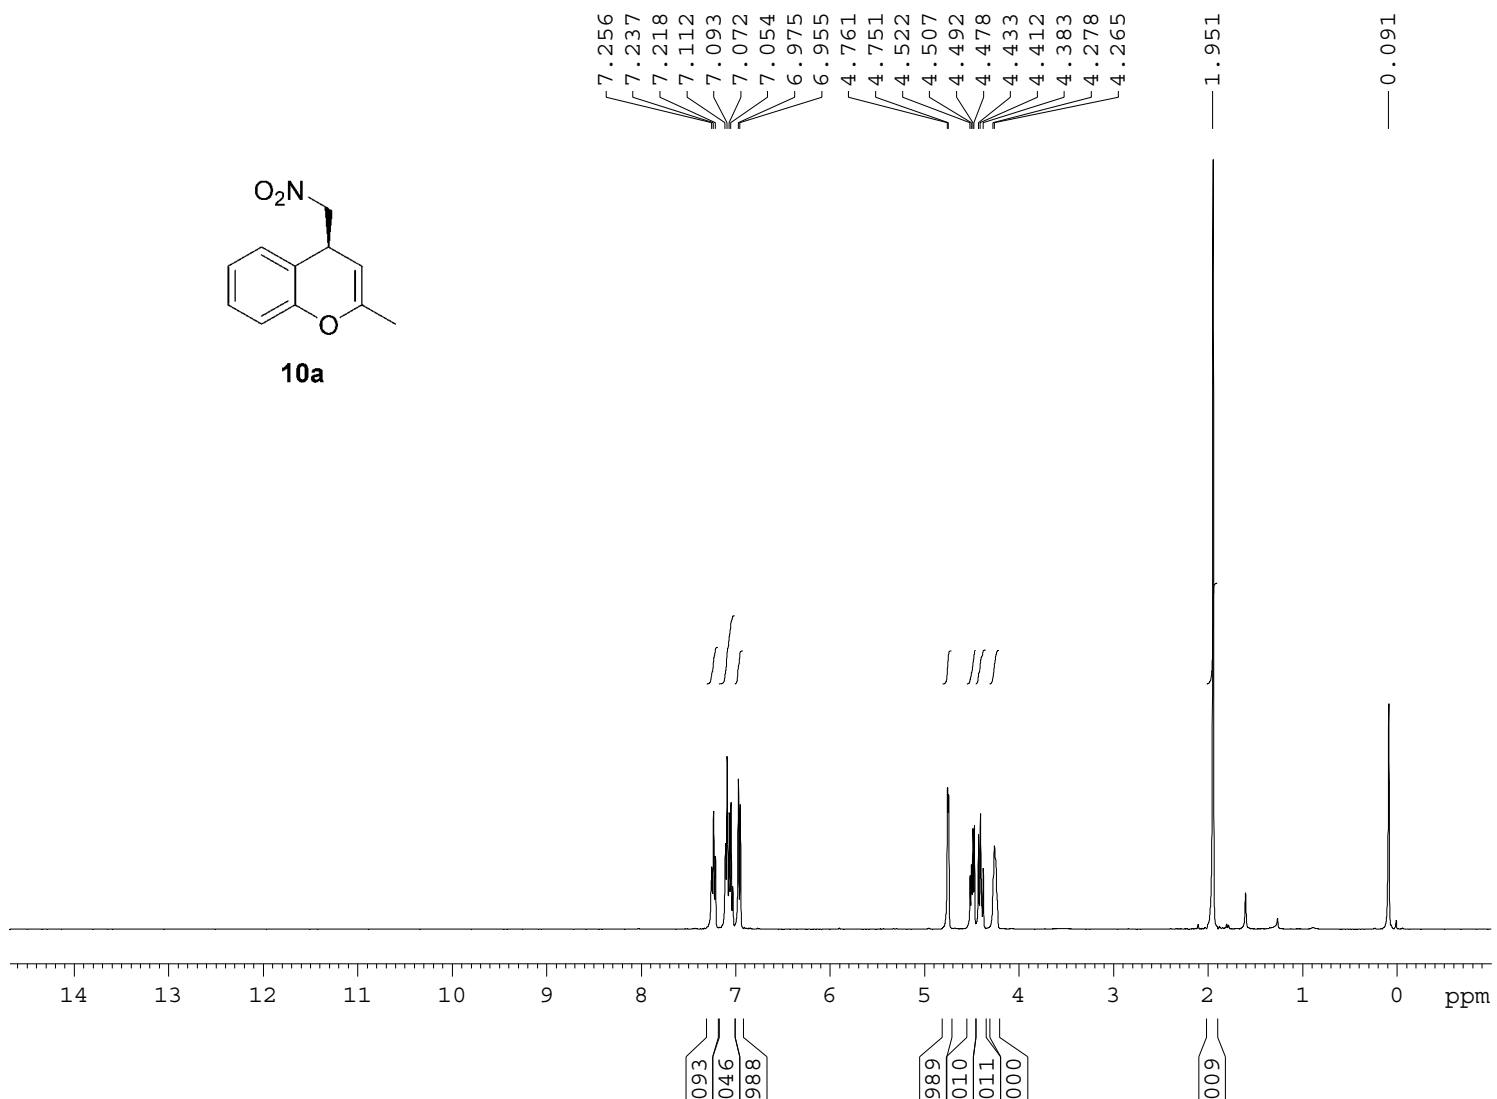

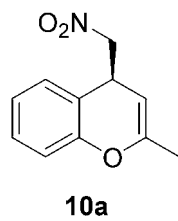

151.649  
150.726

128.797  
128.065  
123.737  
118.222  
116.886

94.548

81.981  
77.318  
77.000  
76.682

33.894

19.333



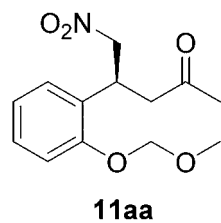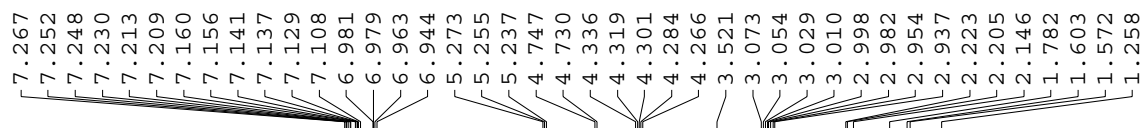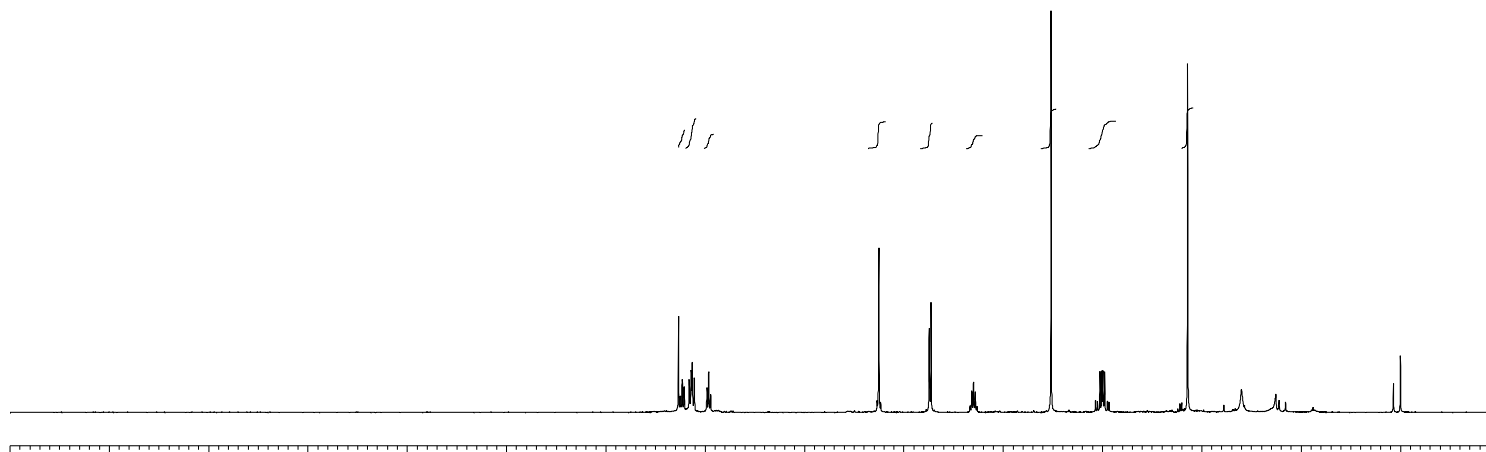

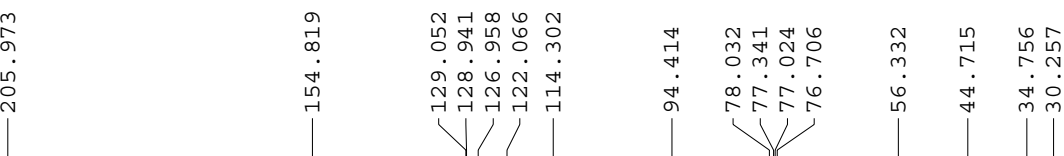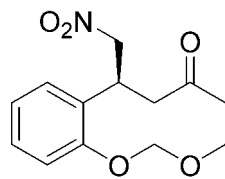

**11aa**

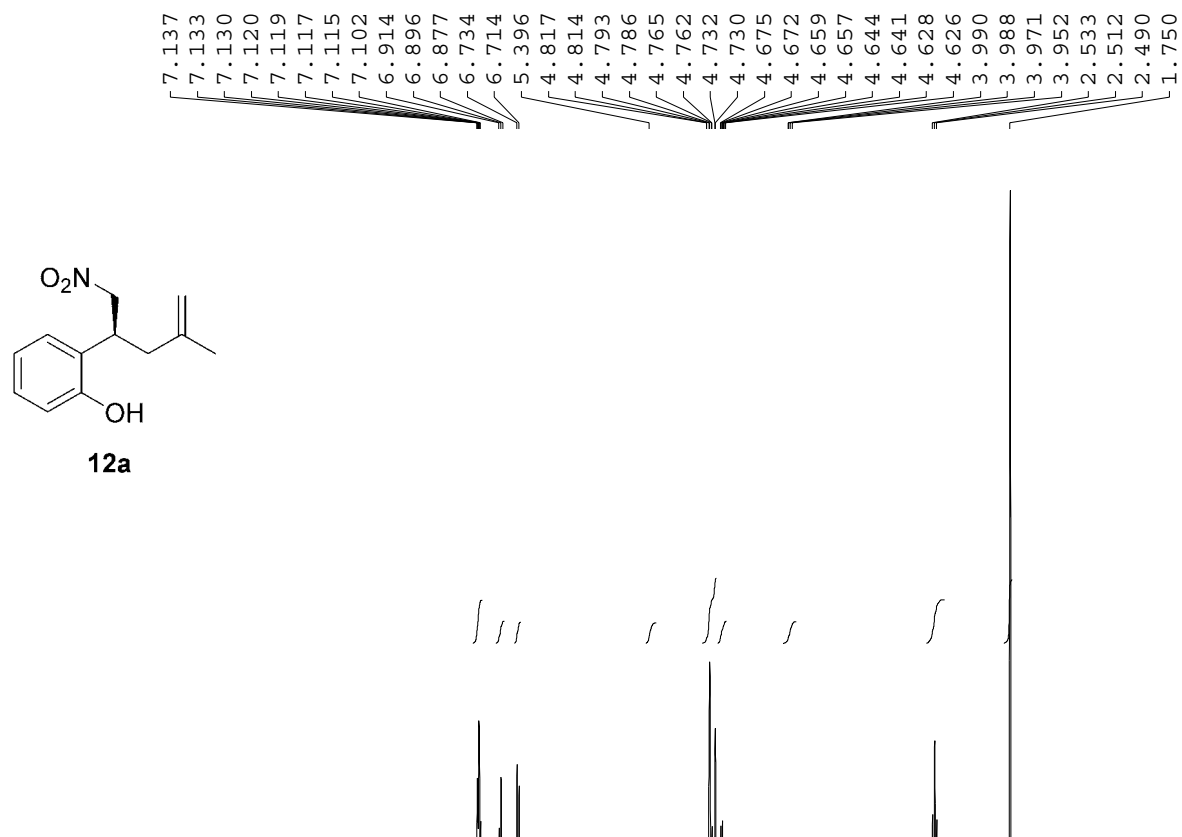

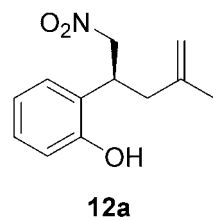

— 153.496

— 142.159

— 129.175

— 128.572

— 125.577

— 121.135

— 116.020

— 113.519

— 78.597

— 77.392

— 77.075

— 76.757

— 39.907

— 37.665

— 22.055

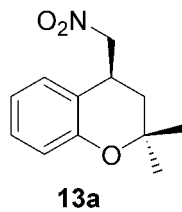

7.256  
7.188  
7.169  
7.150  
7.097  
7.078  
6.906  
6.888  
6.868  
6.850  
6.829  
4.974  
4.962  
4.944  
4.932  
4.423  
4.398  
4.368  
3.784  
3.770  
3.758  
3.745  
3.732  
3.720  
3.705  
2.004  
1.988  
1.970  
1.955  
1.770  
1.741  
1.708  
1.598  
1.444  
1.269  
0.075

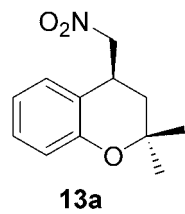

— 153.816

— 128.851  
— 126.319  
— 120.421  
— 118.765  
— 118.380

— 80.082  
— 77.317  
— 77.000  
— 76.682  
— 73.946

— 37.564  
— 31.189  
— 29.565  
— 24.142

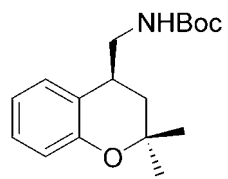

**14a**

7.264  
7.240  
7.144  
7.126  
7.106  
6.899  
6.881  
6.862  
6.812  
6.794  
6.792  
4.502  
3.820  
3.794  
3.786  
3.774  
3.399  
3.387  
3.364  
3.095  
3.082  
1.907  
1.892  
1.873  
1.858  
1.717  
1.685  
1.653  
1.437  
1.428  
1.235  
0.071  
0.000

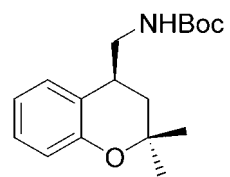

14a

156.179  
154.419

127.918  
126.729  
121.607  
120.204  
117.814

79.402  
77.323  
77.006  
76.689  
74.213

43.601  
37.366  
31.955  
30.003  
28.363  
24.162



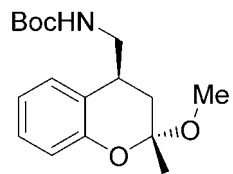

7.265  
7.241  
7.174  
7.154  
7.136  
6.965  
6.946  
6.930  
6.928  
6.876  
6.874  
6.856  
6.853  
4.441  
3.798  
3.791  
3.778  
3.765  
3.756  
3.744  
3.736  
3.515  
3.501  
3.490  
3.481  
3.466  
3.455  
3.288  
3.275  
3.267  
3.261  
3.238  
3.226  
2.176  
2.160  
2.145  
2.126  
2.111  
1.782  
1.750

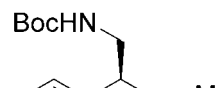

— 156.173  
— 152.816

— 127.783  
— 126.208  
— 123.041  
— 121.172  
— 117.469

— 98.437

— 79.335  
— 77.318  
— 77.203  
— 77.000  
— 76.683

— 48.995  
— 42.468  
— 36.179  
— 30.992  
— 28.344  
— 23.140

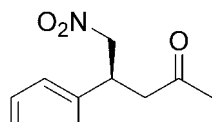

7.251  
7.231  
7.212  
7.133  
7.114  
6.898  
6.882  
6.862  
4.757  
4.726  
4.709  
4.695  
4.682  
4.664  
4.220  
4.203  
4.186  
4.170  
3.837  
3.038  
3.019  
2.993  
2.972  
2.955  
2.926  
2.910  
2.100

Supplementary Material (ESI) for Organic & Biomolecular Chemistry

This journal is (c) The Royal Society of Chemistry 2010

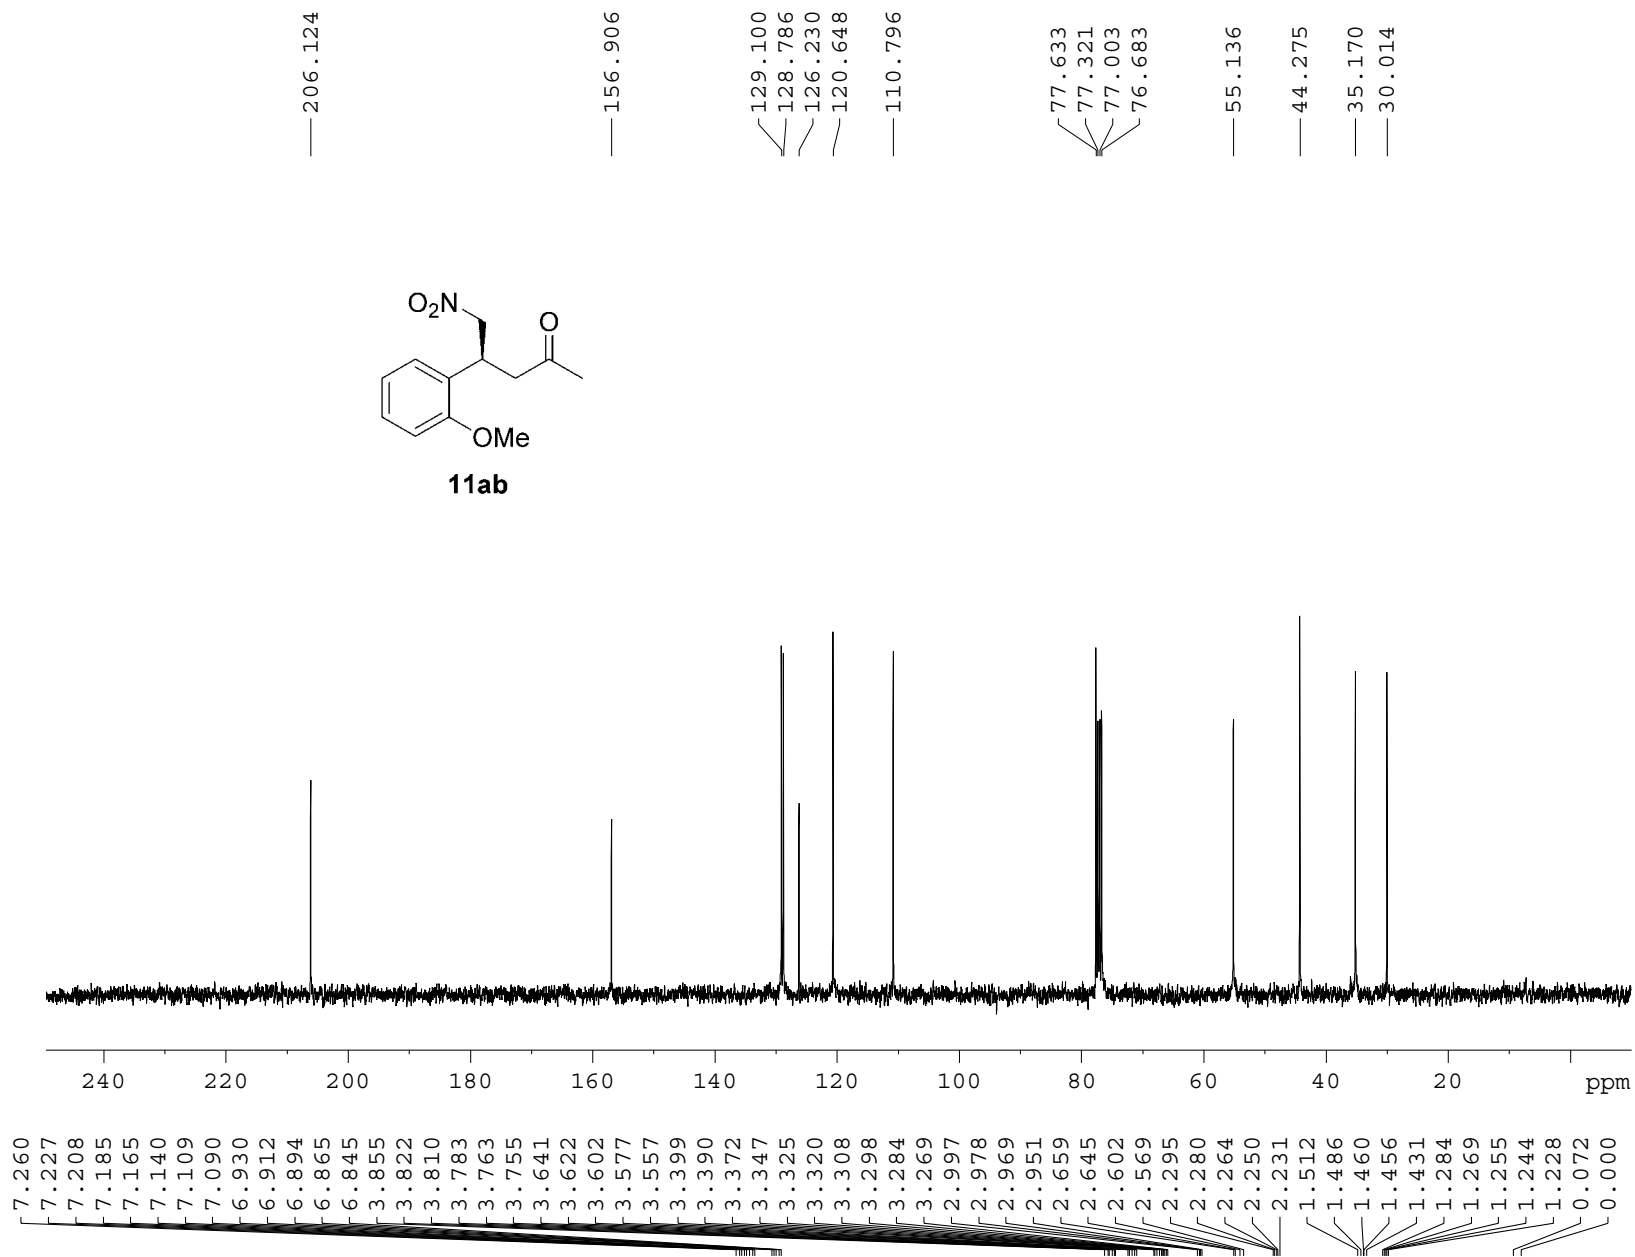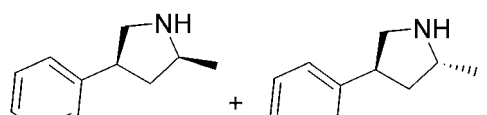

Supplementary Material (ESI) for Organic & Biomolecular Chemistry

This journal is (c) The Royal Society of Chemistry 2010

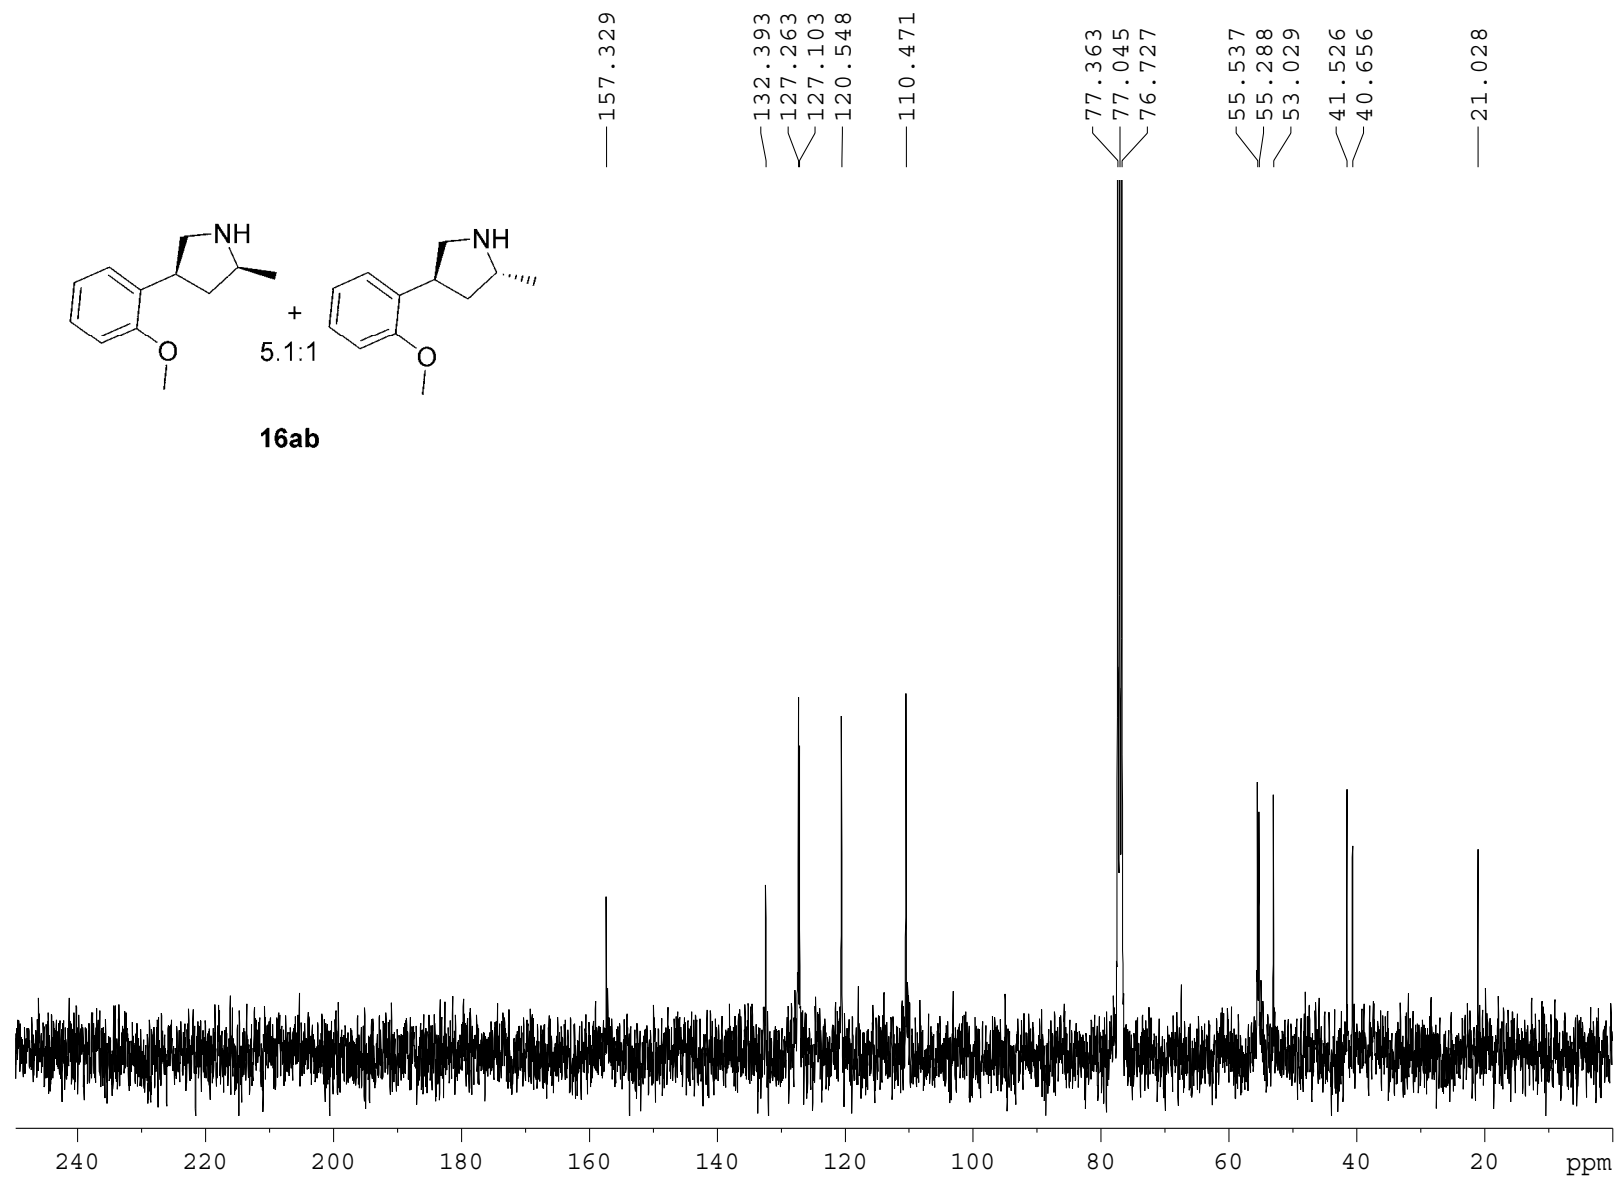

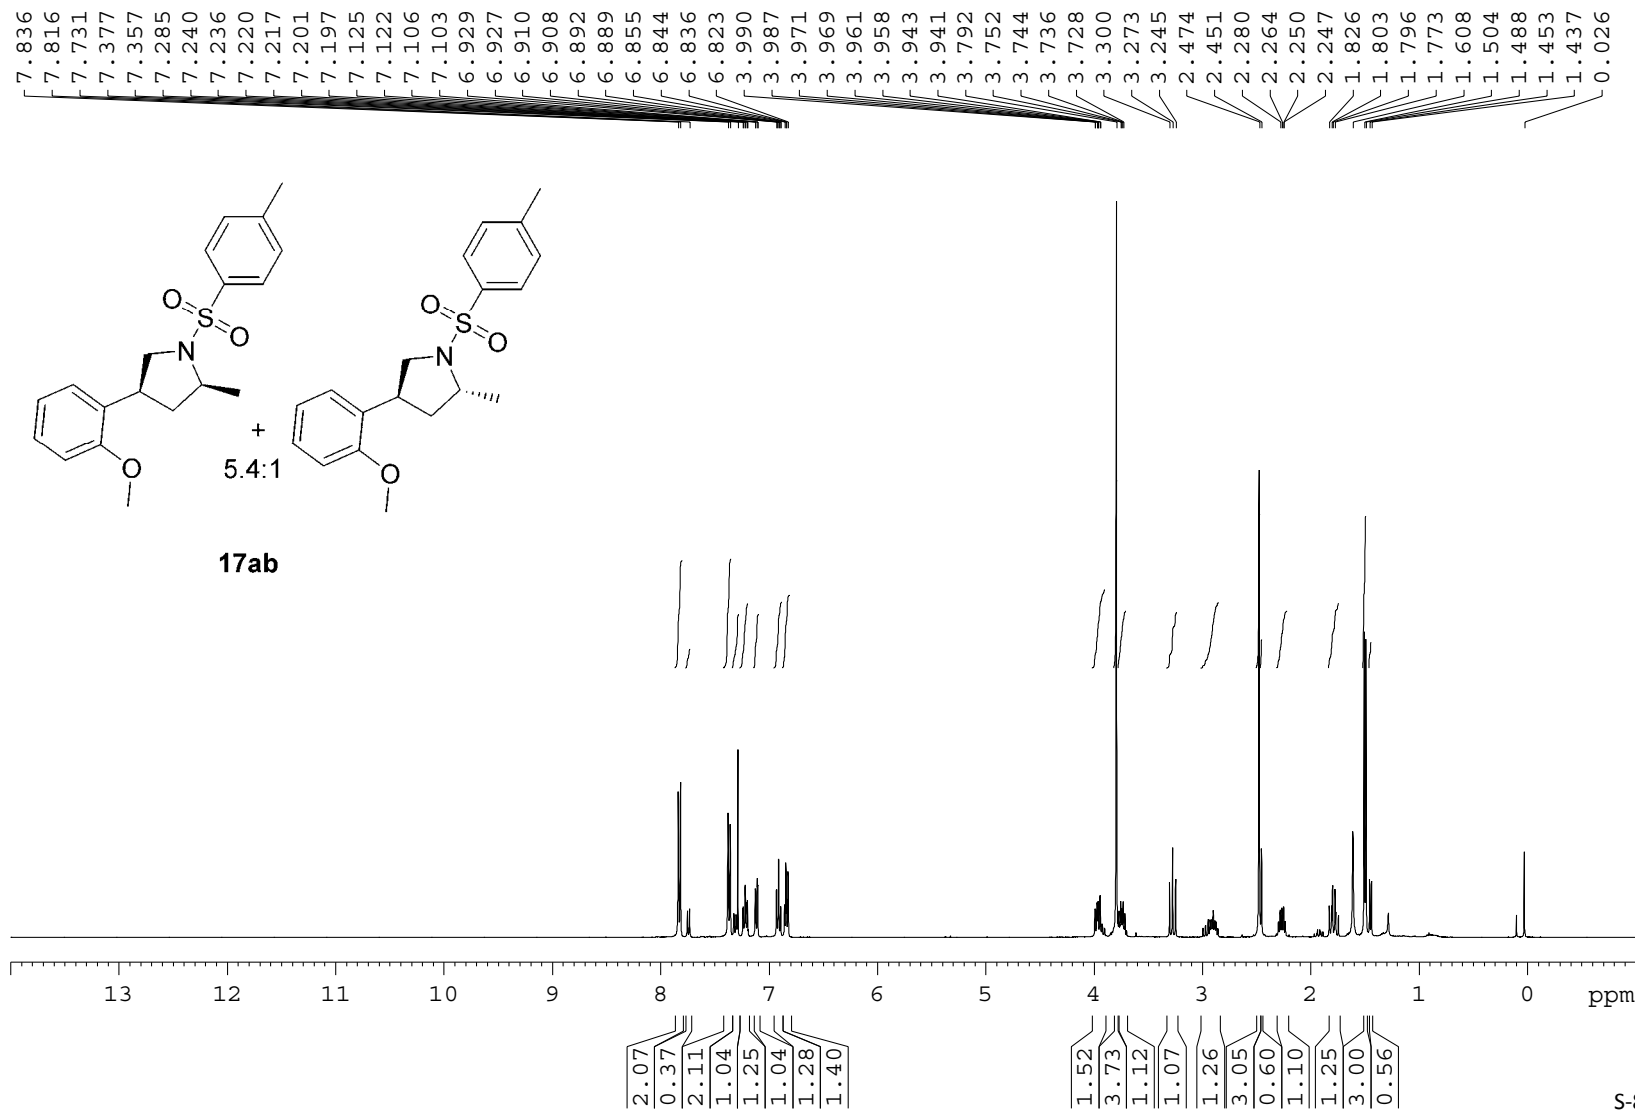



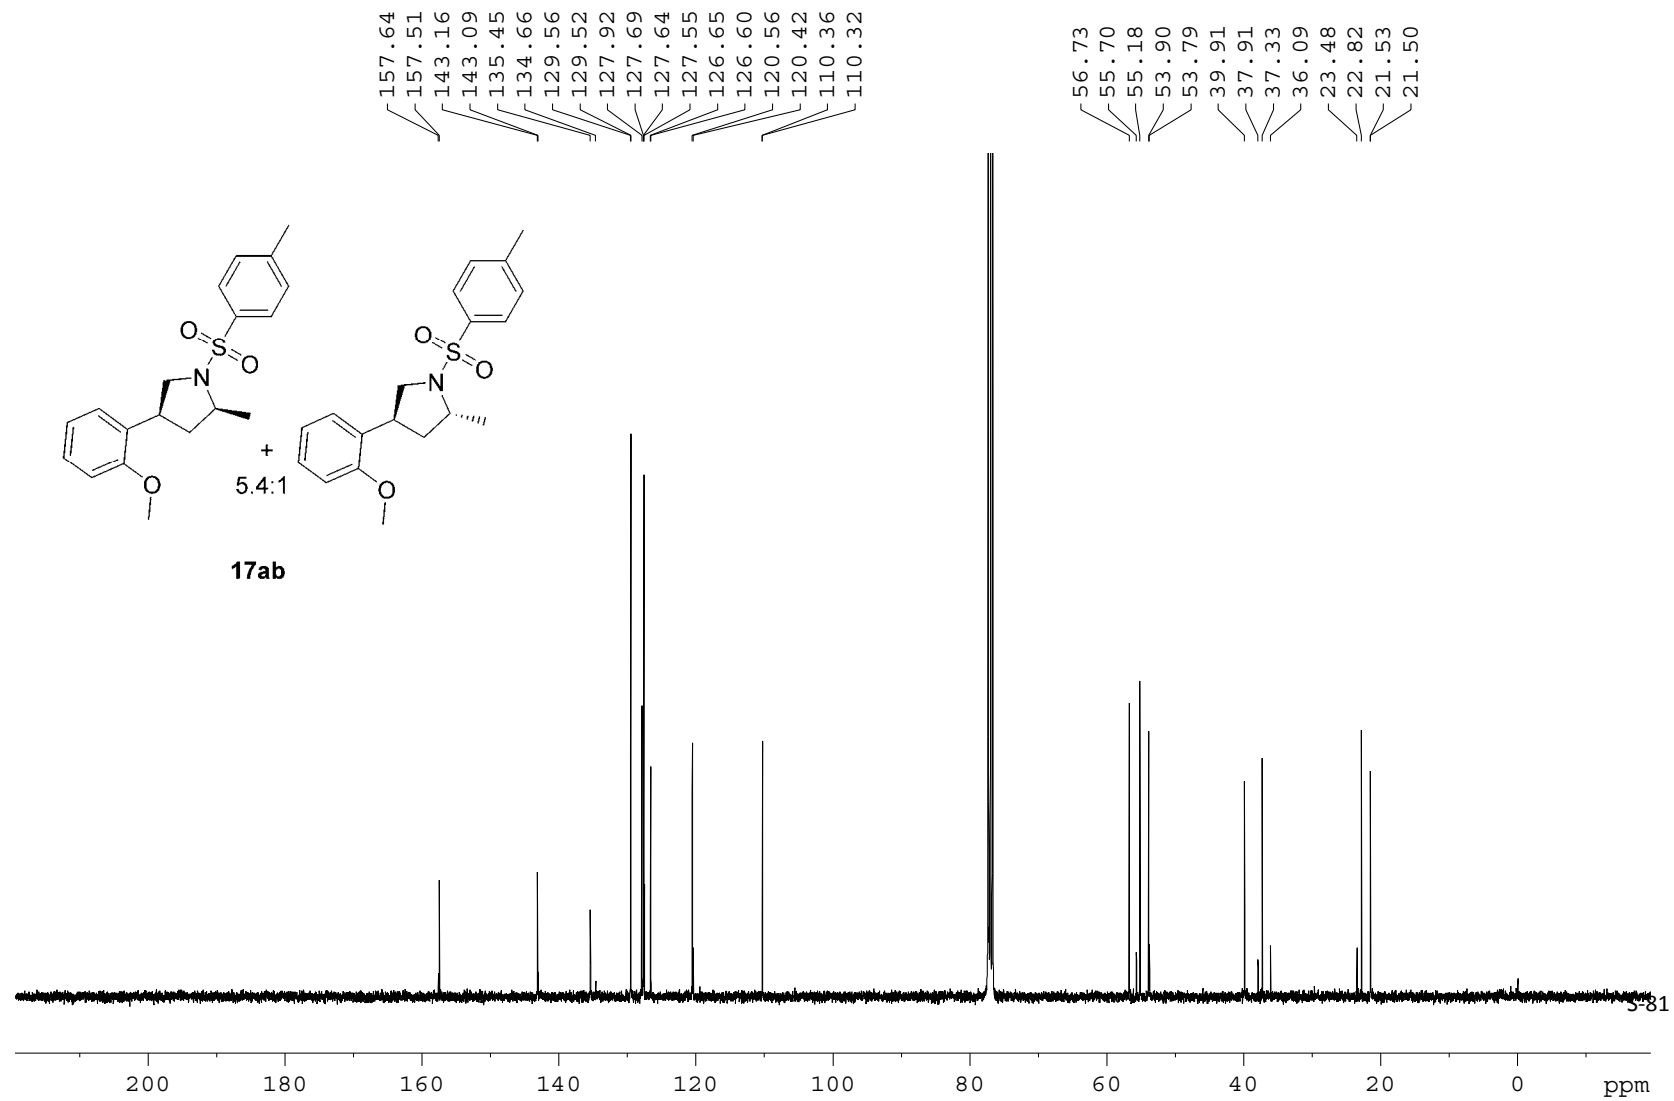



Hetero-COSY experiment on (+)-17ab:

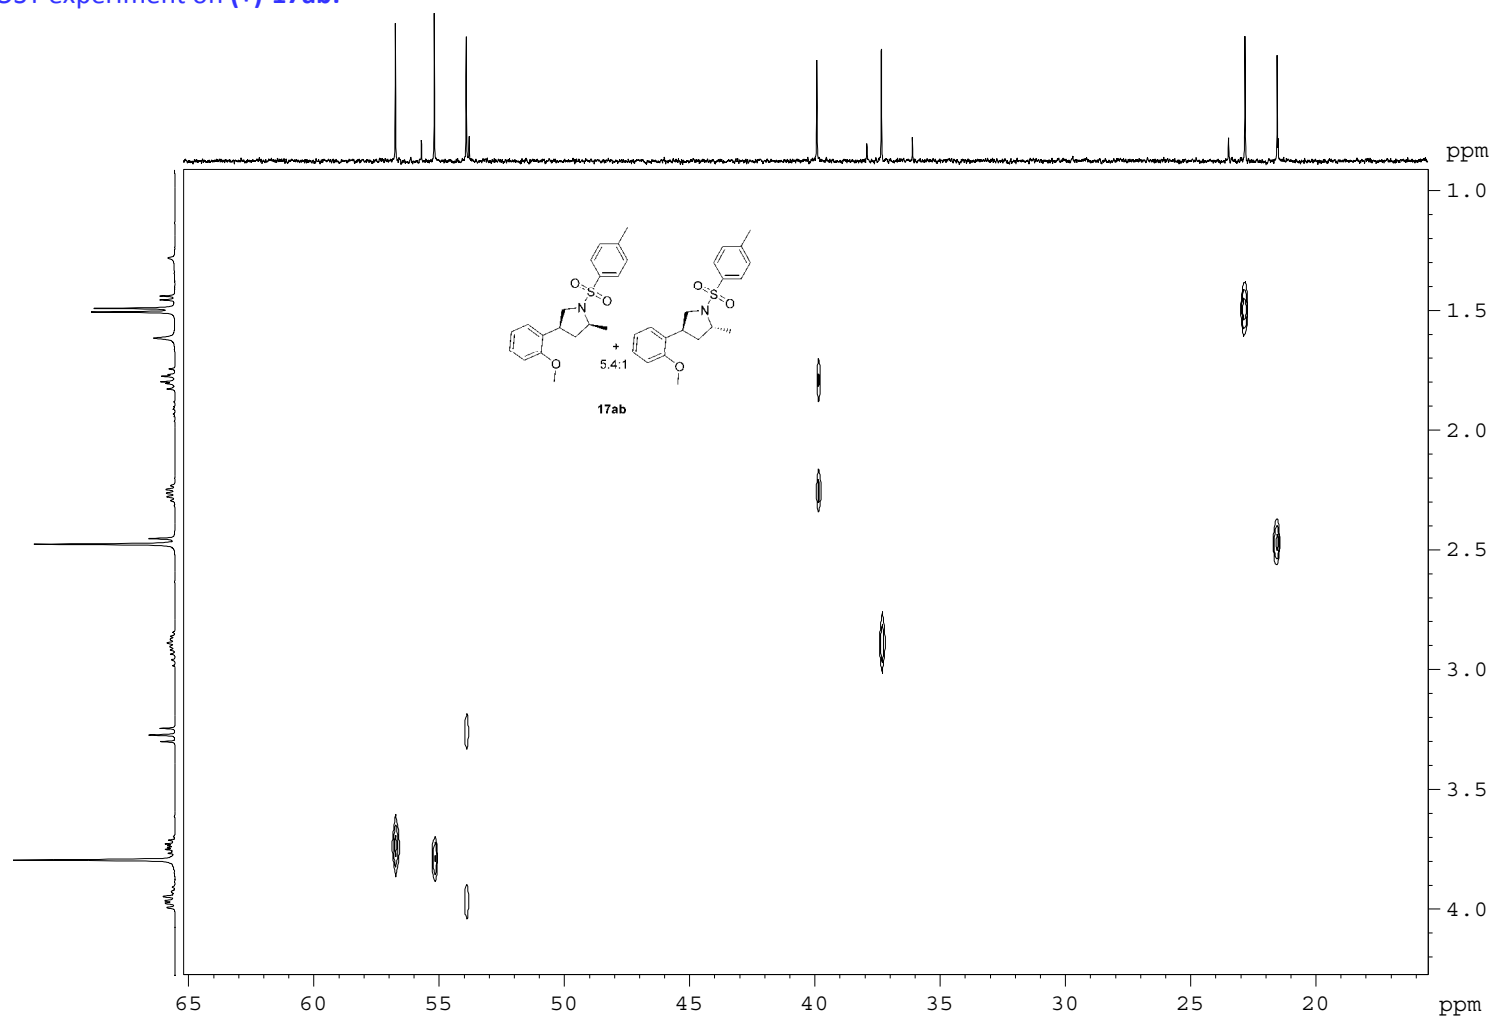

NOSEY Experiment on (+)-17ab:

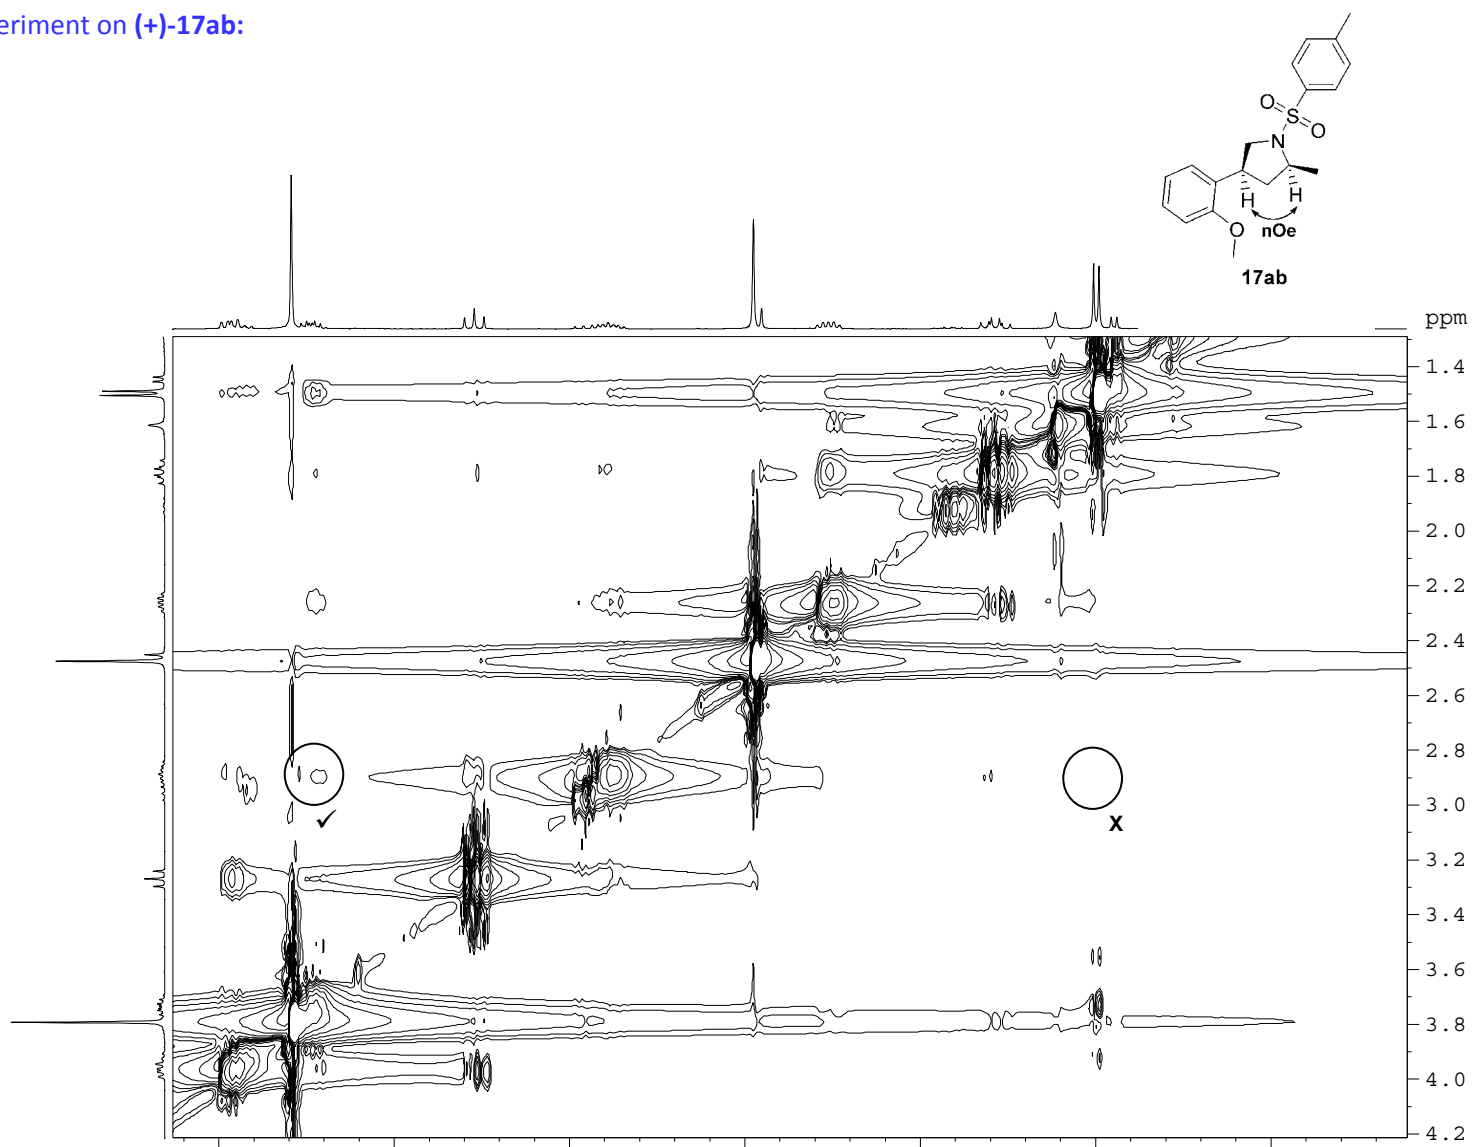

Supplementary Material (ESI) for Organic & Biomolecular Chemistry

This journal is (c) The Royal Society of Chemistry 2010
